# Supplementary material for: Metabolic switch in the aging astrocyte supported via integrative approach comprising network and transcriptome analyses
Source: publisher site journal article supplement (doi:10.18632/aging.204663), 2023-04-18
Supplement: Supplementary file [file aging-v15i19-204663-supplementary-material-SD3.pdf]

## SUPPLEMENTARY TABLES

**Supplementary Table 1. Optimal fluxes relevant to the neuron-astrocyte metabolic network during neurotransmission.**

|                  | Name                                                                       | Reaction                                                                                                   | Flux       | Sensibility   |
|------------------|----------------------------------------------------------------------------|------------------------------------------------------------------------------------------------------------|------------|---------------|
| EX_o2(e)         | Oxygen uptake                                                              | $o2[e] \leftarrow$                                                                                         | -33.425896 | 0.00000e+00   |
| NaEX_Neuron      | Neuronal sodium accumulation rate under stimulation                        | $na1[e] \rightleftharpoons na1[cN]$                                                                        | 350.000024 | 0.00000e+00   |
| NaKt_Neuron      | Neuronal sodium-potassium ATPase pump (sodium removal)                     | $atp[cN] + h2o[cN] + 2.0 k[I] + 3.0 na1[cN] \rightarrow adp[cN] + h[cN] + 2.0 k[cN] + 3.0 na1[I] + pi[cN]$ | 118.045878 | 0.00000e+00   |
| L-LACTt2r_Int    | L-lactate reversible transport via proton symport Interstitial and Synapse | $h[I] + lact-L[I] \leftarrow h[cA] + lac-L[cA]$                                                            | -6.912674  | 0.00000e+00   |
| L-LACTt2r_Neuron | L-lactate reversible transport via proton symport Neuron                   | $h[I] + lact-L[I] \rightarrow h[cN] + lac-L[cN]$                                                           | 6.912674   | 0.00000e+00   |
| GLUVESSEC_Neuron | L-glutamate secretion via secretory vesicle (ATP driven) Neuron            | $atp[cN] + glu-L[cN] + h2o[cN] \rightarrow adp[cN] + glu-L[I] + h[cN] + pi[cN]$                            | 4.137608   | 0.00000e+00   |
| GLNtN1_Int       | Glutamine transporter Interstitial and Synapse                             | $gln-L[I] + h[cA] + na1[i] \rightleftharpoons gln-L[cA] + h[i] + na1[cA]$                                  | -4.137608  | 0.00000e+00   |
| ATPS4m_Neuron    | ATP synthase (four protons per one ATP) Neuron                             | $adp[mN] + 4.0 h[cN] + pi [mN] \rightarrow atp[mN] + h2o[mN] + 3.0 h[mN]$                                  | 155.943088 | -2.775558e-16 |
| ATPS4m           | ATP synthase (four protons per one ATP) Astrocyte                          | $adp[mA] + 4.0 h[cN] + pi [mA] \leftarrow atp[mA] + h2o[mA] + 3.0 h[mA]$                                   | -0.016660  | 8.63000e+00   |
| GLCt1r           | Glucose transport (uniport) Astrocyte                                      | $glc-D[e] \rightarrow glc-D[cA]$                                                                           | 3.452172   | 6.65200e+01   |
| GLCt1r_Neuron    | Glucose transporter Neuron                                                 | $glc-D[e] \rightarrow glc-D[cN]$                                                                           | 2.120199   | 6.00000e+01   |
| ATPtm_Neuron     | ADT/ATP transporter, mitochondrial Neuron                                  | $adp[cN] + atp[mN] \rightarrow adp[mN] + atp[cN]$                                                          | 155.943088 | 0.00000e+00   |
| PYK_Neuron       | Pyruvate kinase Neuron                                                     | $adp[cN] + h[cN] + pep[cN] \rightarrow atp[cN] + pyr[cN]$                                                  | 4.240398   | 0.00000e+00   |
| PYK              | Pyruvate kinase Astrocyte                                                  | $adp[cA] + h[cA] + pep[cA] \rightarrow atp[cA] + pyr[cA]$                                                  | 6.896014   | 0.00000e+00   |

The lactate shuttle is active in both directions; L-LACTt2r\_Int is the efflux from the astrocyte, and L-LACTt2r\_Neuron corresponds to the influx to neurons. Also, the glutamate-glutamine cycle was active for neuronal glutamate export (GLUVESSEC\_Neuron) and glutamine efflux from astrocytes (GLNtN1\_Int).

**Supplementary Table 9. List of aging-related terms found among the functional annotation of differential hub genes.**

| Term                                                | Database                                                   |
|-----------------------------------------------------|------------------------------------------------------------|
| GO:0007568~aging                                    | Gene ontology - biological process                         |
| GO:0007569~cell aging                               | Gene ontology - biological process                         |
| GO:0010259~multicellular organism aging             | Gene ontology - biological process                         |
| m_LongevityPathway:The IGF-1 Receptor and Longevity | BioCarta (online maps of metabolic and signaling pathways) |
