# Supplementary material for: Metabolic switch in the aging astrocyte supported via integrative approach comprising network and transcriptome analyses
Source: Aging (Albany NY). 2023 Apr 18;15(19):9896–912. doi: 10.18632/aging.204663 (PMC10599759; doi:10.18632/aging.204663)
Supplement: Supplementary Table 8 [file aging-15-204663-s005.xlsx]

## Sheet: Readme
Sheet name	Supplementary table	Description
Aging associated DHG	S8	List of differential hub genes with previous functional annotation associated with aging-related terms.

## Sheet: Aging associated DHG
Supplementary Table 8. List of differential hub genes with previous functional annotation associated with aging-related terms.
Official gene symbol	Gene Name	Ensembl Gene ID	Entrez Gene ID	Astrocyte neurotransmission (log2fold-change)	Astrocyte neurotransmission TBOA (log2fold-change)	Neuron neurotransmission (log2fold-change)	Astrocyte aging (age_coefficient)	Neuron aging (age_coefficient)	GOTERM_BP_ALL	GOTERM_CC_ALL	GOTERM_MF_ALL	INTERPRO	KEGG_PATHWAY	PFAM	REACTOME_PATHWAY	UP_TISSUE	UP_KEYWORDS	UP_SEQ_FEATURE	BIOCARTA	BIOGRID_INTERACTION	COG_ONTOLOGY	DIP	EC_NUMBER	INTACT	MINT	Neuron optimal genes	Astrocyte optimal genes	Neuron central genes	Astrocyte central genes
abat	4-aminobutyrate aminotransferase(Abat)	ENSMUSG00000057880	268860	NA	NA	NA	-0.0164984	-0.0118352	GO:0000003~reproduction,GO:0001505~regulation of neurotransmitter levels,GO:0001659~temperature homeostasis,GO:0001666~response to hypoxia,GO:0001775~cell activation,GO:0002790~peptide secretion,GO:0002791~regulation of peptide secretion,GO:0002793~positive regulation of peptide secretion,GO:0003008~system process,GO:0003012~muscle system process,GO:0003013~circulatory system process,GO:0006082~o…	GO:0005576~extracellular region,GO:0005622~intracellular,GO:0005623~cell,GO:0005737~cytoplasm,GO:0005739~mitochondrion,GO:0005759~mitochondrial matrix,GO:0031974~membrane-enclosed lumen,GO:0031982~vesicle,GO:0031988~membrane-bounded vesicle,GO:0032144~4-aminobutyrate transaminase complex,GO:0032991~macromolecular complex,GO:0042995~cell projection,GO:0043005~neuron projection,GO:0043226~organelle…	GO:0003824~catalytic activity,GO:0003867~4-aminobutyrate transaminase activity,GO:0005488~binding,GO:0005515~protein binding,GO:0008483~transaminase activity,GO:0016740~transferase activity,GO:0016769~transferase activity, transferring nitrogenous groups,GO:0019899~enzyme binding,GO:0030170~pyridoxal phosphate binding,GO:0032145~succinate-semialdehyde dehydrogenase binding,GO:0042802~identical pr…	IPR004631:4-aminobutyrate aminotransferase, eukaryotic,IPR005814:Aminotransferase class-III,IPR015421:Pyridoxal phosphate-dependent transferase, major region, subdomain 1,IPR015422:Pyridoxal phosphate-dependent transferase, major region, subdomain 2,IPR015424:Pyridoxal phosphate-dependent transferase,	mmu00250:Alanine, aspartate and glutamate metabolism,mmu00280:Valine, leucine and isoleucine degradation,mmu00410:beta-Alanine metabolism,mmu00640:Propanoate metabolism,mmu00650:Butanoate metabolism,mmu01100:Metabolic pathways,mmu04727:GABAergic synapse,	PF00202:Aminotransferase class-III,	R-MMU-916853:R-MMU-916853,	Activated spleen,Brain,Cerebellum,Head,Hippocampus,Liver,Placenta and extra embryonic tissue,	Acetylation,Alternative splicing,Aminotransferase,Complete proteome,Direct protein sequencing,Disulfide bond,Iron,Iron-sulfur,Metal-binding,Mitochondrion,Neurotransmitter degradation,Proteomics identification,Pyridoxal phosphate,Reference proteome,Transferase,Transit peptide,	chain:4-aminobutyrate aminotransferase, mitochondrial,modified residue,splice variant,transit peptide:Mitochondrion,	0	0	0	0	2.6.1.19,2.6.1.22,	100043456:predicted gene 10681(Gm10681),15495:hydroxy-delta-5-steroid dehydrogenase, 3 beta- and steroid delta-isomerase 4(Hsd3b4),22627:tyrosine 3-monooxygenase/tryptophan 5-monooxygenase activation protein, epsilon polypeptide(Ywhae),	0	NA	NA	NA	Astrocyte-central
dld	dihydrolipoamide dehydrogenase(Dld)	ENSMUSG00000020664	13382	NA	NA	NA	-0.0239992	-0.00718798	GO:0000003~reproduction,GO:0003006~developmental process involved in reproduction,GO:0006082~organic acid metabolic process,GO:0006084~acetyl-CoA metabolic process,GO:0006085~acetyl-CoA biosynthetic process,GO:0006086~acetyl-CoA biosynthetic process from pyruvate,GO:0006090~pyruvate metabolic process,GO:0006091~generation of precursor metabolites and energy,GO:0006103~2-oxoglutarate metabolic pro…	GO:0001669~acrosomal vesicle,GO:0005622~intracellular,GO:0005623~cell,GO:0005634~nucleus,GO:0005654~nucleoplasm,GO:0005737~cytoplasm,GO:0005739~mitochondrion,GO:0005759~mitochondrial matrix,GO:0005773~vacuole,GO:0005929~cilium,GO:0012505~endomembrane system,GO:0016023~cytoplasmic, membrane-bounded vesicle,GO:0030141~secretory granule,GO:0031410~cytoplasmic vesicle,GO:0031974~membrane-enclosed lum…	GO:0000166~nucleotide binding,GO:0003824~catalytic activity,GO:0004148~dihydrolipoyl dehydrogenase activity,GO:0004738~pyruvate dehydrogenase activity,GO:0005488~binding,GO:0016491~oxidoreductase activity,GO:0016620~oxidoreductase activity, acting on the aldehyde or oxo group of donors, NAD or NADP as acceptor,GO:0016651~oxidoreductase activity, acting on NAD(P)H,GO:0016667~oxidoreductase activit…	IPR004099:Pyridine nucleotide-disulphide oxidoreductase, dimerisation,IPR006258:Dihydrolipoamide dehydrogenase,IPR012999:Pyridine nucleotide-disulphide oxidoreductase, class I, active site,IPR016156:FAD/NAD-linked reductase, dimerisation,IPR023753:Pyridine nucleotide-disulphide oxidoreductase, FAD/NAD(P)-binding domain,	mmu00010:Glycolysis / Gluconeogenesis,mmu00020:Citrate cycle (TCA cycle),mmu00260:Glycine, serine and threonine metabolism,mmu00280:Valine, leucine and isoleucine degradation,mmu00620:Pyruvate metabolism,mmu00630:Glyoxylate and dicarboxylate metabolism,mmu01100:Metabolic pathways,mmu01130:Biosynthesis of antibiotics,mmu01200:Carbon metabolism,	PF02852:Pyridine nucleotide-disulphide oxidoreductase, dimerisation domain,PF07992:Pyridine nucleotide-disulphide oxidoreductase,	R-MMU-204174:R-MMU-204174,R-MMU-389661:R-MMU-389661,R-MMU-5362517:R-MMU-5362517,R-MMU-6783984:R-MMU-6783984,R-MMU-70268:R-MMU-70268,R-MMU-70895:R-MMU-70895,R-MMU-71064:R-MMU-71064,R-MMU-71403:R-MMU-71403,	Bone marrow,Brain,Heart,Hippocampus,Liver,Mammary tumor,	Acetylation,Complete proteome,Direct protein sequencing,Disulfide bond,FAD,Flavoprotein,Mitochondrion,NAD,Oxidoreductase,Phosphoprotein,Redox-active center,Reference proteome,Transit peptide,	active site:Proton acceptor,binding site:FAD,binding site:FAD; via amide nitrogen and carbonyl oxygen,binding site:NAD,binding site:NAD; via amide nitrogen,binding site:NAD; via amide nitrogen and carbonyl oxygen,chain:Dihydrolipoyl dehydrogenase, mitochondrial,disulfide bond,modified residue,nucleotide phosphate-binding region:FAD,nucleotide phosphate-binding region:NAD,sequence conflict,transit…	0	15194:Dld~dihydrolipoamide dehydrogenase,16531:Dld~dihydrolipoamide dehydrogenase,170484:Dld~dihydrolipoamide dehydrogenase,3028:Dld~dihydrolipoamide dehydrogenase,	0	0	1.8.1.4,	100043456:predicted gene 10681(Gm10681),13385:discs, large homolog 4 (Drosophila)(Dlg4),14056:enhancer of zeste 2 polycomb repressive complex 2 subunit(Ezh2),15495:hydroxy-delta-5-steroid dehydrogenase, 3 beta- and steroid delta-isomerase 4(Hsd3b4),16531:potassium large conductance calcium-activated channel, subfamily M, alpha member 1(Kcnma1),224742:ATP-binding cassette, sub-family F (GCN20), me…	0	Neuron-optimal	NA	Neuron-central	Astrocyte-central
SLC1A2	solute carrier family 1 (glial high affinity glutamate transporter), member 2(Slc1a2)	ENSMUSG00000005089	20511	NA	NA	0.202012	-0.0130324	0.0175032	GO:0001101~response to acid chemical,GO:0006810~transport,GO:0006811~ion transport,GO:0006820~anion transport,GO:0006835~dicarboxylic acid transport,GO:0006865~amino acid transport,GO:0006950~response to stress,GO:0007154~cell communication,GO:0007275~multicellular organism development,GO:0007399~nervous system development,GO:0007417~central nervous system development,GO:0007420~brain development…	GO:0005623~cell,GO:0005886~plasma membrane,GO:0005887~integral component of plasma membrane,GO:0009986~cell surface,GO:0016020~membrane,GO:0016021~integral component of membrane,GO:0030424~axon,GO:0030425~dendrite,GO:0030673~axolemma,GO:0031224~intrinsic component of membrane,GO:0031226~intrinsic component of plasma membrane,GO:0031252~cell leading edge,GO:0031253~cell projection membrane,GO:0031…	GO:0005215~transporter activity,GO:0005283~sodium:amino acid symporter activity,GO:0005313~L-glutamate transmembrane transporter activity,GO:0005314~high-affinity glutamate transmembrane transporter activity,GO:0005342~organic acid transmembrane transporter activity,GO:0005343~organic acid:sodium symporter activity,GO:0005416~cation:amino acid symporter activity,GO:0008324~cation transmembrane tr…	IPR001991:Sodium:dicarboxylate symporter,IPR018107:Sodium:dicarboxylate symporter, conserved site,	mmu04724:Glutamatergic synapse,mmu05014:Amyotrophic lateral sclerosis (ALS),	PF00375:Sodium:dicarboxylate symporter family,	R-MMU-210455:R-MMU-210455,R-MMU-210500:R-MMU-210500,R-MMU-425393:R-MMU-425393,	Brain,Brain cortex,Cerebellum,Corpora quadrigemina,Liver,Medulla oblongata,	Alternative splicing,Complete proteome,Direct protein sequencing,Glycoprotein,Lipoprotein,Membrane,Palmitate,Phosphoprotein,Proteomics identification,Reference proteome,Symport,Transmembrane,Transmembrane helix,Transport,	chain:Excitatory amino acid transporter 2,glycosylation site:N-linked (GlcNAc...),modified residue,sequence conflict,splice variant,topological domain:Cytoplasmic,topological domain:Extracellular,transmembrane region,		12367:Slc1a2~solute carrier family 1 (glial high affinity glutamate transporter), member 2,15194:Slc1a2~solute carrier family 1 (glial high affinity glutamate transporter), member 2,6622:Slc1a2~solute carrier family 1 (glial high affinity glutamate transporter), member 2,7329:UBE2I~ubiquitin conjugating enzyme E2 I,				13385:discs, large homolog 4 (Drosophila)(Dlg4),14812:glutamate receptor, ionotropic, NMDA2B (epsilon 2)(Grin2b),20977:synaptophysin(Syp),22627:tyrosine 3-monooxygenase/tryptophan 5-monooxygenase activation protein, epsilon polypeptide(Ywhae),54401:tyrosine 3-monooxygenase/tryptophan 5-monooxygenase activation protein, beta polypeptide(Ywhab),		NA	Astrocyte-optimal	NA	NA
sod1	superoxide dismutase 1, soluble(Sod1)	ENSMUSG00000022982	20655	NA	NA	NA	NA	-0.00835001	GO:0000003~reproduction,GO:0000165~MAPK cascade,GO:0000187~activation of MAPK activity,GO:0000302~response to reactive oxygen species,GO:0000303~response to superoxide,GO:0000305~response to oxygen radical,GO:0000902~cell morphogenesis,GO:0000904~cell morphogenesis involved in differentiation,GO:0001541~ovarian follicle development,GO:0001816~cytokine production,GO:0001817~regulation of cytokine …	GO:0000323~lytic vacuole,GO:0005576~extracellular region,GO:0005615~extracellular space,GO:0005622~intracellular,GO:0005623~cell,GO:0005634~nucleus,GO:0005654~nucleoplasm,GO:0005737~cytoplasm,GO:0005739~mitochondrion,GO:0005740~mitochondrial envelope,GO:0005758~mitochondrial intermembrane space,GO:0005764~lysosome,GO:0005773~vacuole,GO:0005777~peroxisome,GO:0005829~cytosol,GO:0005886~plasma membr…	GO:0003824~catalytic activity,GO:0004784~superoxide dismutase activity,GO:0005488~binding,GO:0005507~copper ion binding,GO:0005515~protein binding,GO:0008270~zinc ion binding,GO:0016209~antioxidant activity,GO:0016491~oxidoreductase activity,GO:0016721~oxidoreductase activity, acting on superoxide radicals as acceptor,GO:0017016~Ras GTPase binding,GO:0017048~Rho GTPase binding,GO:0019899~enzyme b…	IPR001424:Superoxide dismutase, copper/zinc binding domain,IPR018152:Superoxide dismutase, copper/zinc, binding site,IPR024134:Superoxide dismutase (Cu/Zn) / chaperones,	mmu04146:Peroxisome,mmu05014:Amyotrophic lateral sclerosis (ALS),mmu05016:Huntington's disease,mmu05020:Prion diseases,	PF00080:Copper/zinc superoxide dismutase (SODC),	R-MMU-114608:R-MMU-114608,R-MMU-3299685:R-MMU-3299685,	Hippocampus,Liver,Lung,Mammary gland,Ovary,Retina,Urinary bladder,Uterus,	3D-structure,Acetylation,Antioxidant,Complete proteome,Copper,Cytoplasm,Direct protein sequencing,Disulfide bond,Lipoprotein,Metal-binding,Nucleus,Oxidoreductase,Palmitate,Phosphoprotein,Reference proteome,Zinc,	chain:Superoxide dismutase [Cu-Zn],disulfide bond,metal ion-binding site:Copper; catalytic,metal ion-binding site:Zinc; structural,modified residue,sequence conflict,	m_freePathway:Free Radical Induced Apoptosis,m_LongevityPathway:The IGF-1 Receptor and Longevity,	10016:PDCD6~programmed cell death 6,10999:SLC27A4~solute carrier family 27 member 4,11051:NUDT21~nudix hydrolase 21,11060:WWP2~WW domain containing E3 ubiquitin protein ligase 2,124245:ZC3H18~zinc finger CCCH-type containing 18,16348:Sod1~superoxide dismutase 1, soluble,18412:Sod1~superoxide dismutase 1, soluble,18412:Sqstm1~sequestosome 1,20655:Sod1~superoxide dismutase 1, soluble,22800:RRAS2~re…	0	0	1.15.1.1,	100043456:predicted gene 10681(Gm10681),101502:hydroxy-delta-5-steroid dehydrogenase, 3 beta- and steroid delta-isomerase 7(Hsd3b7),13058:cytochrome b-245, beta polypeptide(Cybb),13385:discs, large homolog 4 (Drosophila)(Dlg4),15495:hydroxy-delta-5-steroid dehydrogenase, 3 beta- and steroid delta-isomerase 4(Hsd3b4),16348:inversin(Invs),16531:potassium large conductance calcium-activated channel,…	100041194:AHNAK nucleoprotein 2(Ahnak2),100043813:ribosomal protein S27, retrogene(Rps27rt),100043876:predicted gene 4705(Gm4705),100609:NOL1/NOP2/Sun domain family, member 5(Nsun5),100678:phosphoserine phosphatase(Psph),100763:ubiquitin protein ligase E3C(Ube3c),100862468:NHP2-like protein 1(LOC100862468),101314:BRICK1, SCAR/WAVE actin-nucleating complex subunit(Brk1),102595:pleckstrin homology …	NA	NA	Neuron-central	Astrocyte-central
sod2	superoxide dismutase 2, mitochondrial(Sod2)	ENSMUSG00000006818	20656	NA	NA	NA	0.00544969	-0.0060007	GO:0000302~response to reactive oxygen species,GO:0000303~response to superoxide,GO:0000305~response to oxygen radical,GO:0001101~response to acid chemical,GO:0001306~age-dependent response to oxidative stress,GO:0001315~age-dependent response to reactive oxygen species,GO:0001666~response to hypoxia,GO:0001836~release of cytochrome c from mitochondria,GO:0001889~liver development,GO:0001976~neur…	GO:0005576~extracellular region,GO:0005622~intracellular,GO:0005623~cell,GO:0005737~cytoplasm,GO:0005739~mitochondrion,GO:0005740~mitochondrial envelope,GO:0005743~mitochondrial inner membrane,GO:0005759~mitochondrial matrix,GO:0009295~nucleoid,GO:0016020~membrane,GO:0019866~organelle inner membrane,GO:0031090~organelle membrane,GO:0031966~mitochondrial membrane,GO:0031967~organelle envelope,GO:0…	GO:0003676~nucleic acid binding,GO:0003677~DNA binding,GO:0003824~catalytic activity,GO:0004784~superoxide dismutase activity,GO:0005488~binding,GO:0005515~protein binding,GO:0016209~antioxidant activity,GO:0016491~oxidoreductase activity,GO:0016721~oxidoreductase activity, acting on superoxide radicals as acceptor,GO:0019825~oxygen binding,GO:0019899~enzyme binding,GO:0030145~manganese ion bindi…	IPR001189:Manganese/iron superoxide dismutase,IPR019831:Manganese/iron superoxide dismutase, N-terminal,IPR019832:Manganese/iron superoxide dismutase, C-terminal,IPR019833:Manganese/iron superoxide dismutase, binding site,	mmu04068:FoxO signaling pathway,mmu04146:Peroxisome,mmu05016:Huntington's disease,	PF00081:Iron/manganese superoxide dismutases, alpha-hairpin domain,PF02777:Iron/manganese superoxide dismutases, C-terminal domain,	R-MMU-3299685:R-MMU-3299685,	Bone marrow,Brain,Embryo,Heart,Hippocampus,Kidney,Liver,Mammary gland,Mullerian duct includes surrounding region,Placenta,	Acetylation,Complete proteome,Direct protein sequencing,Manganese,Metal-binding,Mitochondrion,Nitration,Oxidoreductase,Reference proteome,Transit peptide,	chain:Superoxide dismutase [Mn], mitochondrial,metal ion-binding site:Manganese,modified residue,sequence conflict,transit peptide:Mitochondrion,	m_eponfkbPathway:Erythropoietin mediated neuroprotection through NF-kB,m_LongevityPathway:The IGF-1 Receptor and Longevity,	12015:Sod2~superoxide dismutase 2, mitochondrial,16531:Sod2~superoxide dismutase 2, mitochondrial,	Inorganic ion transport and metabolism,	0	1.15.1.1,	100043456:predicted gene 10681(Gm10681),15495:hydroxy-delta-5-steroid dehydrogenase, 3 beta- and steroid delta-isomerase 4(Hsd3b4),16531:potassium large conductance calcium-activated channel, subfamily M, alpha member 1(Kcnma1),18975:polymerase (DNA directed), gamma(Polg),22059:transformation related protein 53(Trp53),22627:tyrosine 3-monooxygenase/tryptophan 5-monooxygenase activation protein, e…	0	NA	NA	Neuron-central	Astrocyte-central
SOD3	superoxide dismutase 3, extracellular(Sod3)	ENSMUSG00000072941	20657	1.28557	2.39124	NA	0.0105135	0.0137208	GO:0000302~response to reactive oxygen species,GO:0001666~response to hypoxia,GO:0006801~superoxide metabolic process,GO:0006950~response to stress,GO:0006979~response to oxidative stress,GO:0008152~metabolic process,GO:0009628~response to abiotic stimulus,GO:0009987~cellular process,GO:0010035~response to inorganic substance,GO:0010038~response to metal ion,GO:0036293~response to decreased oxyge…	GO:0005576~extracellular region,GO:0005615~extracellular space,GO:0005622~intracellular,GO:0005623~cell,GO:0005634~nucleus,GO:0005737~cytoplasm,GO:0005794~Golgi apparatus,GO:0005796~Golgi lumen,GO:0005802~trans-Golgi network,GO:0012505~endomembrane system,GO:0031012~extracellular matrix,GO:0031974~membrane-enclosed lumen,GO:0031982~vesicle,GO:0031984~organelle subcompartment,GO:0031988~membrane-b…	GO:0003824~catalytic activity,GO:0004784~superoxide dismutase activity,GO:0005488~binding,GO:0005507~copper ion binding,GO:0005515~protein binding,GO:0008270~zinc ion binding,GO:0016209~antioxidant activity,GO:0016491~oxidoreductase activity,GO:0016721~oxidoreductase activity, acting on superoxide radicals as acceptor,GO:0043167~ion binding,GO:0043169~cation binding,GO:0046872~metal ion binding,G…	IPR001424:Superoxide dismutase, copper/zinc binding domain,IPR018152:Superoxide dismutase, copper/zinc, binding site,IPR024134:Superoxide dismutase (Cu/Zn) / chaperones,		PF00080:Copper/zinc superoxide dismutase (SODC),	R-MMU-3299685:R-MMU-3299685,	Atherosclerotic vessel,Kidney,Liver,Lung,Mammary gland,Mammary tumor metastatized to lung. Tumor arose spontaneously,	3D-structure,Antioxidant,Complete proteome,Copper,Direct protein sequencing,Disulfide bond,Glycoprotein,Metal-binding,Oxidoreductase,Reference proteome,Secreted,Signal,Zinc,	chain:Extracellular superoxide dismutase [Cu- Zn],disulfide bond,glycosylation site:N-linked (GlcNAc...),metal ion-binding site:Copper; catalytic,metal ion-binding site:Zinc; structural,signal peptide,	m_LongevityPathway:The IGF-1 Receptor and Longevity,	11977:Atp7a~ATPase, Cu++ transporting, alpha polypeptide,			1.15.1.1,	22627:tyrosine 3-monooxygenase/tryptophan 5-monooxygenase activation protein, epsilon polypeptide(Ywhae),		NA	NA	Neuron-central	Astrocyte-central
