# Supplementary material for: Metabolic switch in the aging astrocyte supported via integrative approach comprising network and transcriptome analyses
Source: Aging (Albany NY). 2023 Apr 18;15(19):9896–912. doi: 10.18632/aging.204663 (PMC10599759; doi:10.18632/aging.204663)
Supplement: Supplementary Tables 2-7 [file aging-15-204663-s004.xlsx]

## Sheet: Readme
Sheet	Supplementary table	Description
All hub genes	S2	List of all hub genes for the neuron and astrocyte. Original human entrez gene ID are shown with corresponding mouse orthologs.
All DHG	S3	Unique list of all differential hub genes, for both astrocyte and neuron, during neurotransmission and aging.
Astrocyte neurotransmission	S4	Differential hub genes in the astrocyte during neurotransmission, including reported fold-change for both databases and cell types (Hasel et al., 2017; Tabula Muris Consortium, 2020).
Neuron neurotransmission	S5	Differential hub genes in the neuron during neurotransmission, including reported fold-change for both databases and cell types (Hasel et al., 2017; Tabula Muris Consortium, 2020).
Astrocyte aging	S6	Differential hub genes in the astrocyte during aging, including reported fold-change for both databases and cell types (Hasel et al., 2017; Tabula Muris Consortium, 2020).
Neuron aging	S7	Differential hub genes in the neuron during aging, including reported fold-change for both databases and cell types (Hasel et al., 2017; Tabula Muris Consortium, 2020).
Note: for Supplementary Tables S4-S7, colors for each row indicate upregulation (light orange) and downregulation (light blue) for the cell type and condition of that sheet (indicated in light green).

## Sheet: All hub genes
Supplementary Table 2. List of all hub genes for the neuron and astrocyte. Original human entrez gene ID are shown with corresponding mouse orthologs.
g#	initial_alias	initial_ensg	o#	ortholog_name	ortholog_ensg	description	Neuron optimal genes	Astrocyte optimal genes	Neuron central genes	Astrocyte central genes
1	65985	ENSG00000081760	1.1.1	Aacs	ENSMUSG00000029482	acetoacetyl-CoA synthetase [Source:MGI Symbol;Acc:MGI:1926144]	Neuron-optimal	NA	NA	NA
2	50	ENSG00000100412	2.1.1	Aco2	ENSMUSG00000022477	aconitase 2, mitochondrial [Source:MGI Symbol;Acc:MGI:87880]	Neuron-optimal	NA	NA	NA
3	48	ENSG00000122729	3.1.1	Aco1	ENSMUSG00000028405	aconitase 1 [Source:MGI Symbol;Acc:MGI:87879]	Neuron-optimal	NA	NA	NA
4	3658	ENSG00000136381	4.1.1	Ireb2	ENSMUSG00000032293	iron responsive element binding protein 2 [Source:MGI Symbol;Acc:MGI:1928268]	Neuron-optimal	NA	NA	NA
5	4967	ENSG00000105953	5.1.1	Ogdh	ENSMUSG00000020456	oxoglutarate (alpha-ketoglutarate) dehydrogenase (lipoamide) [Source:MGI Symbol;Acc:MGI:1098267]	Neuron-optimal	NA	NA	NA
6	1738	ENSG00000091140	6.1.1	Dld	ENSMUSG00000020664	dihydrolipoamide dehydrogenase [Source:MGI Symbol;Acc:MGI:107450]	Neuron-optimal	NA	Neuron-central	Astrocyte-central
7	1743	ENSG00000119689	7.1.1	Dlst	ENSMUSG00000004789	dihydrolipoamide S-succinyltransferase (E2 component of 2-oxo-glutarate complex) [Source:MGI Symbol;Acc:MGI:1926170]	Neuron-optimal	NA	NA	NA
8	8050	ENSG00000110435	8.1.1	Pdhx	ENSMUSG00000010914	pyruvate dehydrogenase complex, component X [Source:MGI Symbol;Acc:MGI:1351627]	Neuron-optimal	NA	NA	NA
9	1468	ENSG00000183048	9.1.1	Slc25a10	ENSMUSG00000025792	solute carrier family 25 (mitochondrial carrier, dicarboxylate transporter), member 10 [Source:MGI Symbol;Acc:MGI:1353497]	Neuron-optimal	NA	NA	NA
10	8402	ENSG00000108528	10.1.1	Slc25a11	ENSMUSG00000014606	solute carrier family 25 (mitochondrial carrier oxoglutarate carrier), member 11 [Source:MGI Symbol;Acc:MGI:1915113]	Neuron-optimal	NA	NA	NA
11	10165	ENSG00000004864	11.1.1	Slc25a13	ENSMUSG00000015112	solute carrier family 25 (mitochondrial carrier, adenine nucleotide translocator), member 13 [Source:MGI Symbol;Acc:MGI:1354721]	Neuron-optimal	NA	Neuron-central	Astrocyte-central
12	8604	ENSG00000115840	12.1.1	Slc25a12	ENSMUSG00000027010	solute carrier family 25 (mitochondrial carrier, Aralar), member 12 [Source:MGI Symbol;Acc:MGI:1926080]	Neuron-optimal	NA	Neuron-central	Astrocyte-central
13	2805	ENSG00000120053	13.1.1	Got1	ENSMUSG00000025190	glutamic-oxaloacetic transaminase 1, soluble [Source:MGI Symbol;Acc:MGI:95791]	Neuron-optimal	NA	Neuron-central	Astrocyte-central
14	2806	ENSG00000125166	14.1.1	Got2	ENSMUSG00000031672	glutamatic-oxaloacetic transaminase 2, mitochondrial [Source:MGI Symbol;Acc:MGI:95792]	Neuron-optimal	NA	Neuron-central	Astrocyte-central
15	292	ENSG00000005022	15.1.1	Slc25a5	ENSMUSG00000016319	solute carrier family 25 (mitochondrial carrier, adenine nucleotide translocator), member 5 [Source:MGI Symbol;Acc:MGI:1353496]	Neuron-optimal	NA	NA	NA
16	291	ENSG00000151729	16.1.1	Slc25a4	ENSMUSG00000031633	solute carrier family 25 (mitochondrial carrier, adenine nucleotide translocator), member 4 [Source:MGI Symbol;Acc:MGI:1353495]	Neuron-optimal	NA	NA	NA
17	293	ENSG00000169100	17.1.1	N/A	N/A	N/A	Neuron-optimal	NA	NA	NA
18	84532	ENSG00000154930	18.1.1	Acss1	ENSMUSG00000027452	acyl-CoA synthetase short-chain family member 1 [Source:MGI Symbol;Acc:MGI:1915988]	Neuron-optimal	NA	Neuron-central	Astrocyte-central
19	1431	ENSG00000062485	19.1.1	N/A	N/A	N/A	Neuron-optimal	NA	Neuron-central	Astrocyte-central
20	160728	ENSG00000256870	20.1.1	Slc5a8	ENSMUSG00000020062	solute carrier family 5 (iodide transporter), member 8 [Source:MGI Symbol;Acc:MGI:2384916]	Neuron-optimal	Astrocyte-optimal	Neuron-central	Astrocyte-central
21	1576	ENSG00000160868	21.1.1	Cyp3a25	ENSMUSG00000029630	cytochrome P450, family 3, subfamily a, polypeptide 25 [Source:MGI Symbol;Acc:MGI:1930638]	Neuron-optimal	NA	Neuron-central	Astrocyte-central
21	1576	ENSG00000160868	21.1.2	Cyp3a13	ENSMUSG00000029727	cytochrome P450, family 3, subfamily a, polypeptide 13 [Source:MGI Symbol;Acc:MGI:88610]	Neuron-optimal	NA	Neuron-central	Astrocyte-central
21	1576	ENSG00000160868	21.1.3	Cyp3a16	ENSMUSG00000038656	cytochrome P450, family 3, subfamily a, polypeptide 16 [Source:MGI Symbol;Acc:MGI:106099]	Neuron-optimal	NA	Neuron-central	Astrocyte-central
21	1576	ENSG00000160868	21.1.4	Cyp3a44	ENSMUSG00000054417	cytochrome P450, family 3, subfamily a, polypeptide 44 [Source:MGI Symbol;Acc:MGI:2449818]	Neuron-optimal	NA	Neuron-central	Astrocyte-central
21	1576	ENSG00000160868	21.1.5	Cyp3a11	ENSMUSG00000056035	cytochrome P450, family 3, subfamily a, polypeptide 11 [Source:MGI Symbol;Acc:MGI:88609]	Neuron-optimal	NA	Neuron-central	Astrocyte-central
21	1576	ENSG00000160868	21.1.6	Cyp3a59	ENSMUSG00000061292	cytochrome P450, family 3, subfamily a, polypeptide 59 [Source:MGI Symbol;Acc:MGI:3769707]	Neuron-optimal	NA	Neuron-central	Astrocyte-central
21	1576	ENSG00000160868	21.1.7	Cyp3a57	ENSMUSG00000070419	cytochrome P450, family 3, subfamily a, polypeptide 57 [Source:MGI Symbol;Acc:MGI:3646373]	Neuron-optimal	NA	Neuron-central	Astrocyte-central
21	1576	ENSG00000160868	21.1.8	Cyp3a41a	ENSMUSG00000075551	cytochrome P450, family 3, subfamily a, polypeptide 41A [Source:MGI Symbol;Acc:MGI:1858451]	Neuron-optimal	NA	Neuron-central	Astrocyte-central
21	1576	ENSG00000160868	21.1.9	Cyp3a41b	ENSMUSG00000075552	cytochrome P450, family 3, subfamily a, polypeptide 41B [Source:MGI Symbol;Acc:MGI:3714859]	Neuron-optimal	NA	Neuron-central	Astrocyte-central
22	1558	ENSG00000138115	22.1.1	N/A	N/A	N/A	Neuron-optimal	NA	Neuron-central	Astrocyte-central
23	1565	ENSG00000100197	23.1.1	Cyp2d26	ENSMUSG00000022445	cytochrome P450, family 2, subfamily d, polypeptide 26 [Source:MGI Symbol;Acc:MGI:1923529]	Neuron-optimal	NA	Neuron-central	Astrocyte-central
23	1565	ENSG00000100197	23.1.2	Cyp2d22	ENSMUSG00000061740	cytochrome P450, family 2, subfamily d, polypeptide 22 [Source:MGI Symbol;Acc:MGI:1929474]	Neuron-optimal	NA	Neuron-central	Astrocyte-central
23	1565	ENSG00000100197	23.1.3	Cyp2d40	ENSMUSG00000068083	cytochrome P450, family 2, subfamily d, polypeptide 40 [Source:MGI Symbol;Acc:MGI:1919004]	Neuron-optimal	NA	Neuron-central	Astrocyte-central
23	1565	ENSG00000100197	23.1.4	Cyp2d11	ENSMUSG00000068085	cytochrome P450, family 2, subfamily d, polypeptide 11 [Source:MGI Symbol;Acc:MGI:88603]	Neuron-optimal	NA	Neuron-central	Astrocyte-central
23	1565	ENSG00000100197	23.1.5	Cyp2d9	ENSMUSG00000068086	cytochrome P450, family 2, subfamily d, polypeptide 9 [Source:MGI Symbol;Acc:MGI:88606]	Neuron-optimal	NA	Neuron-central	Astrocyte-central
23	1565	ENSG00000100197	23.1.6	Cyp2d34	ENSMUSG00000094559	cytochrome P450, family 2, subfamily d, polypeptide 34 [Source:MGI Symbol;Acc:MGI:2385022]	Neuron-optimal	NA	Neuron-central	Astrocyte-central
23	1565	ENSG00000100197	23.1.7	Cyp2d10	ENSMUSG00000094806	cytochrome P450, family 2, subfamily d, polypeptide 10 [Source:MGI Symbol;Acc:MGI:88602]	Neuron-optimal	NA	Neuron-central	Astrocyte-central
23	1565	ENSG00000100197	23.1.8	Cyp2d12	ENSMUSG00000096852	cytochrome P450, family 2, subfamily d, polypeptide 12 [Source:MGI Symbol;Acc:MGI:88604]	Neuron-optimal	NA	Neuron-central	Astrocyte-central
23	1565	ENSG00000100197	23.1.9	Cyp2d13	ENSMUSG00000118516	cytochrome P450, family 2, subfamily d, polypeptide 13 [Source:MGI Symbol;Acc:MGI:88605]	Neuron-optimal	NA	Neuron-central	Astrocyte-central
24	1577	ENSG00000106258	24.1.1	Cyp3a25	ENSMUSG00000029630	cytochrome P450, family 3, subfamily a, polypeptide 25 [Source:MGI Symbol;Acc:MGI:1930638]	Neuron-optimal	NA	Neuron-central	Astrocyte-central
24	1577	ENSG00000106258	24.1.2	Cyp3a13	ENSMUSG00000029727	cytochrome P450, family 3, subfamily a, polypeptide 13 [Source:MGI Symbol;Acc:MGI:88610]	Neuron-optimal	NA	Neuron-central	Astrocyte-central
24	1577	ENSG00000106258	24.1.3	Cyp3a16	ENSMUSG00000038656	cytochrome P450, family 3, subfamily a, polypeptide 16 [Source:MGI Symbol;Acc:MGI:106099]	Neuron-optimal	NA	Neuron-central	Astrocyte-central
24	1577	ENSG00000106258	24.1.4	Cyp3a44	ENSMUSG00000054417	cytochrome P450, family 3, subfamily a, polypeptide 44 [Source:MGI Symbol;Acc:MGI:2449818]	Neuron-optimal	NA	Neuron-central	Astrocyte-central
24	1577	ENSG00000106258	24.1.5	Cyp3a11	ENSMUSG00000056035	cytochrome P450, family 3, subfamily a, polypeptide 11 [Source:MGI Symbol;Acc:MGI:88609]	Neuron-optimal	NA	Neuron-central	Astrocyte-central
24	1577	ENSG00000106258	24.1.6	Cyp3a59	ENSMUSG00000061292	cytochrome P450, family 3, subfamily a, polypeptide 59 [Source:MGI Symbol;Acc:MGI:3769707]	Neuron-optimal	NA	Neuron-central	Astrocyte-central
24	1577	ENSG00000106258	24.1.7	Cyp3a57	ENSMUSG00000070419	cytochrome P450, family 3, subfamily a, polypeptide 57 [Source:MGI Symbol;Acc:MGI:3646373]	Neuron-optimal	NA	Neuron-central	Astrocyte-central
24	1577	ENSG00000106258	24.1.8	Cyp3a41a	ENSMUSG00000075551	cytochrome P450, family 3, subfamily a, polypeptide 41A [Source:MGI Symbol;Acc:MGI:1858451]	Neuron-optimal	NA	Neuron-central	Astrocyte-central
24	1577	ENSG00000106258	24.1.9	Cyp3a41b	ENSMUSG00000075552	cytochrome P450, family 3, subfamily a, polypeptide 41B [Source:MGI Symbol;Acc:MGI:3714859]	Neuron-optimal	NA	Neuron-central	Astrocyte-central
25	5446	ENSG00000105852	25.1.1	Pon3	ENSMUSG00000029759	paraoxonase 3 [Source:MGI Symbol;Acc:MGI:106686]	Neuron-optimal	NA	Neuron-central	Astrocyte-central
26	2109	ENSG00000105379	26.1.1	Etfb	ENSMUSG00000004610	electron transferring flavoprotein, beta polypeptide [Source:MGI Symbol;Acc:MGI:106098]	Neuron-optimal	NA	NA	NA
26	2109	ENSG00000105379	26.1.2	Etfbl	ENSMUSG00000107482	electron transferring flavoprotein, beta polypeptide like [Source:MGI Symbol;Acc:MGI:5753809]	Neuron-optimal	NA	NA	NA
27	2108	ENSG00000140374	27.1.1	Etfa	ENSMUSG00000032314	electron transferring flavoprotein, alpha polypeptide [Source:MGI Symbol;Acc:MGI:106092]	Neuron-optimal	NA	NA	NA
28	2110	ENSG00000171503	28.1.1	Etfdh	ENSMUSG00000027809	electron transferring flavoprotein, dehydrogenase [Source:MGI Symbol;Acc:MGI:106100]	Neuron-optimal	NA	NA	NA
29	2168	ENSG00000163586	29.1.1	Fabp1	ENSMUSG00000054422	fatty acid binding protein 1, liver [Source:MGI Symbol;Acc:MGI:95479]	Neuron-optimal	NA	Neuron-central	Astrocyte-central
30	2271	ENSG00000091483	30.1.1	Fh1	ENSMUSG00000026526	fumarate hydratase 1 [Source:MGI Symbol;Acc:MGI:95530]	Neuron-optimal	NA	NA	NA
31	2184	ENSG00000103876	31.1.1	Fah	ENSMUSG00000030630	fumarylacetoacetate hydrolase [Source:MGI Symbol;Acc:MGI:95482]	Neuron-optimal	NA	NA	NA
32	9380	ENSG00000137106	32.1.1	Grhpr	ENSMUSG00000035637	glyoxylate reductase/hydroxypyruvate reductase [Source:MGI Symbol;Acc:MGI:1923488]	Neuron-optimal	NA	Neuron-central	Astrocyte-central
33	343	ENSG00000103375	33.1.1	Aqp8	ENSMUSG00000030762	aquaporin 8 [Source:MGI Symbol;Acc:MGI:1195271]	Neuron-optimal	NA	NA	NA
34	366	ENSG00000103569	34.1.1	Aqp9	ENSMUSG00000032204	aquaporin 9 [Source:MGI Symbol;Acc:MGI:1891066]	Neuron-optimal	NA	Neuron-central	Astrocyte-central
35	4284	ENSG00000135517	35.1.1	N/A	N/A	N/A	Neuron-optimal	NA	NA	NA
36	362	ENSG00000161798	36.1.1	Aqp5	ENSMUSG00000044217	aquaporin 5 [Source:MGI Symbol;Acc:MGI:106215]	Neuron-optimal	NA	NA	NA
37	361	ENSG00000171885	37.1.1	Aqp4	ENSMUSG00000024411	aquaporin 4 [Source:MGI Symbol;Acc:MGI:107387]	Neuron-optimal	NA	NA	NA
38	358	ENSG00000240583	38.1.1	Aqp1	ENSMUSG00000004655	aquaporin 1 [Source:MGI Symbol;Acc:MGI:103201]	Neuron-optimal	NA	NA	NA
39	359	ENSG00000167580	39.1.1	Aqp2	ENSMUSG00000023013	aquaporin 2 [Source:MGI Symbol;Acc:MGI:1096865]	Neuron-optimal	NA	NA	NA
40	3157	ENSG00000112972	40.1.1	Hmgcs1	ENSMUSG00000093930	3-hydroxy-3-methylglutaryl-Coenzyme A synthase 1 [Source:MGI Symbol;Acc:MGI:107592]	Neuron-optimal	NA	Neuron-central	Astrocyte-central
41	3158	ENSG00000134240	41.1.1	Hmgcs2	ENSMUSG00000027875	3-hydroxy-3-methylglutaryl-Coenzyme A synthase 2 [Source:MGI Symbol;Acc:MGI:101939]	Neuron-optimal	NA	Neuron-central	Astrocyte-central
42	3155	ENSG00000117305	42.1.1	Hmgcl	ENSMUSG00000028672	3-hydroxy-3-methylglutaryl-Coenzyme A lyase [Source:MGI Symbol;Acc:MGI:96158]	Neuron-optimal	NA	NA	NA
43	54511	ENSG00000146151	43.1.1	Hmgcll1	ENSMUSG00000007908	3-hydroxymethyl-3-methylglutaryl-Coenzyme A lyase-like 1 [Source:MGI Symbol;Acc:MGI:2446108]	Neuron-optimal	NA	NA	NA
44	3417	ENSG00000138413	44.1.1	Idh1	ENSMUSG00000025950	isocitrate dehydrogenase 1 (NADP+), soluble [Source:MGI Symbol;Acc:MGI:96413]	Neuron-optimal	NA	NA	NA
45	3418	ENSG00000182054	45.1.1	Idh2	ENSMUSG00000030541	isocitrate dehydrogenase 2 (NADP+), mitochondrial [Source:MGI Symbol;Acc:MGI:96414]	Neuron-optimal	NA	NA	NA
46	4191	ENSG00000146701	46.1.1	Mdh2	ENSMUSG00000019179	malate dehydrogenase 2, NAD (mitochondrial) [Source:MGI Symbol;Acc:MGI:97050]	Neuron-optimal	NA	Neuron-central	Astrocyte-central
47	4190	ENSG00000014641	47.1.1	Mdh1	ENSMUSG00000020321	malate dehydrogenase 1, NAD (soluble) [Source:MGI Symbol;Acc:MGI:97051]	Neuron-optimal	NA	Neuron-central	Astrocyte-central
48	130752	ENSG00000138400	48.1.1	Mdh1b	ENSMUSG00000025963	malate dehydrogenase 1B, NAD (soluble) [Source:MGI Symbol;Acc:MGI:1923918]	Neuron-optimal	NA	Neuron-central	Astrocyte-central
49	23439	ENSG00000101892	49.1.1	N/A	N/A	N/A	Neuron-optimal	NA	NA	NA
50	476	ENSG00000163399	50.1.1	Atp1a1	ENSMUSG00000033161	ATPase, Na+/K+ transporting, alpha 1 polypeptide [Source:MGI Symbol;Acc:MGI:88105]	Neuron-optimal	NA	NA	NA
51	481	ENSG00000143153	51.1.1	Atp1b1	ENSMUSG00000026576	ATPase, Na+/K+ transporting, beta 1 polypeptide [Source:MGI Symbol;Acc:MGI:88108]	Neuron-optimal	NA	NA	NA
52	480	ENSG00000132681	52.1.1	Atp1a4	ENSMUSG00000007107	ATPase, Na+/K+ transporting, alpha 4 polypeptide [Source:MGI Symbol;Acc:MGI:1351335]	Neuron-optimal	NA	NA	NA
53	478	ENSG00000105409	53.1.1	Atp1a3	ENSMUSG00000040907	ATPase, Na+/K+ transporting, alpha 3 polypeptide [Source:MGI Symbol;Acc:MGI:88107]	Neuron-optimal	NA	NA	NA
54	477	ENSG00000018625	54.1.1	Atp1a2	ENSMUSG00000007097	ATPase, Na+/K+ transporting, alpha 2 polypeptide [Source:MGI Symbol;Acc:MGI:88106]	Neuron-optimal	NA	NA	NA
55	482	ENSG00000129244	55.1.1	Atp1b2	ENSMUSG00000041329	ATPase, Na+/K+ transporting, beta 2 polypeptide [Source:MGI Symbol;Acc:MGI:88109]	Neuron-optimal	NA	NA	NA
56	483	ENSG00000069849	56.1.1	Atp1b3	ENSMUSG00000032412	ATPase, Na+/K+ transporting, beta 3 polypeptide [Source:MGI Symbol;Acc:MGI:107788]	Neuron-optimal	NA	NA	NA
57	64064	ENSG00000198754	57.1.1	Oxct2a	ENSMUSG00000076436	3-oxoacid CoA transferase 2A [Source:MGI Symbol;Acc:MGI:1891061]	Neuron-optimal	NA	NA	NA
57	64064	ENSG00000198754	57.1.2	Oxct2b	ENSMUSG00000076438	3-oxoacid CoA transferase 2B [Source:MGI Symbol;Acc:MGI:2664115]	Neuron-optimal	NA	NA	NA
58	5019	ENSG00000083720	58.1.1	Oxct1	ENSMUSG00000022186	3-oxoacid CoA transferase 1 [Source:MGI Symbol;Acc:MGI:1914291]	Neuron-optimal	NA	NA	NA
59	5160	ENSG00000131828	59.1.1	Pdha1	ENSMUSG00000031299	pyruvate dehydrogenase E1 alpha 1 [Source:MGI Symbol;Acc:MGI:97532]	Neuron-optimal	NA	NA	NA
60	5161	ENSG00000163114	60.1.1	Pdha2	ENSMUSG00000047674	pyruvate dehydrogenase E1 alpha 2 [Source:MGI Symbol;Acc:MGI:97533]	Neuron-optimal	NA	NA	NA
61	5162	ENSG00000168291	61.1.1	Pdhb	ENSMUSG00000021748	pyruvate dehydrogenase (lipoamide) beta [Source:MGI Symbol;Acc:MGI:1915513]	Neuron-optimal	NA	NA	NA
62	1737	ENSG00000150768	62.1.1	Dlat	ENSMUSG00000000168	dihydrolipoamide S-acetyltransferase (E2 component of pyruvate dehydrogenase complex) [Source:MGI Symbol;Acc:MGI:2385311]	Neuron-optimal	NA	NA	NA
63	5250	ENSG00000075415	63.1.1	N/A	N/A	N/A	Neuron-optimal	NA	Neuron-central	Astrocyte-central
64	6566	ENSG00000155380	64.1.1	Slc16a1	ENSMUSG00000032902	solute carrier family 16 (monocarboxylic acid transporters), member 1 [Source:MGI Symbol;Acc:MGI:106013]	Neuron-optimal	NA	Neuron-central	Astrocyte-central
65	6391	ENSG00000143252	65.1.1	Sdhc	ENSMUSG00000058076	succinate dehydrogenase complex, subunit C, integral membrane protein [Source:MGI Symbol;Acc:MGI:1913302]	Neuron-optimal	NA	NA	NA
66	6389	ENSG00000073578	66.1.1	Sdha	ENSMUSG00000021577	succinate dehydrogenase complex, subunit A, flavoprotein (Fp) [Source:MGI Symbol;Acc:MGI:1914195]	Neuron-optimal	NA	NA	NA
67	6390	ENSG00000117118	67.1.1	Sdhb	ENSMUSG00000009863	succinate dehydrogenase complex, subunit B, iron sulfur (Ip) [Source:MGI Symbol;Acc:MGI:1914930]	Neuron-optimal	NA	NA	NA
68	6392	ENSG00000204370	68.1.1	Sdhd	ENSMUSG00000000171	succinate dehydrogenase complex, subunit D, integral membrane protein [Source:MGI Symbol;Acc:MGI:1914175]	Neuron-optimal	NA	NA	NA
69	23530	ENSG00000112992	69.1.1	Nnt	ENSMUSG00000025453	nicotinamide nucleotide transhydrogenase [Source:MGI Symbol;Acc:MGI:109279]	Neuron-optimal	NA	Neuron-central	Astrocyte-central
69	23530	ENSG00000112992	69.1.2	Nnt	ENSMUSG00000116207	nicotinamide nucleotide transhydrogenase [Source:MGI Symbol;Acc:MGI:109279]	Neuron-optimal	NA	Neuron-central	Astrocyte-central
70	6517	ENSG00000181856	70.1.1	Slc2a4	ENSMUSG00000018566	solute carrier family 2 (facilitated glucose transporter), member 4 [Source:MGI Symbol;Acc:MGI:95758]	Neuron-optimal	Astrocyte-optimal	NA	NA
71	6515	ENSG00000059804	71.1.1	N/A	N/A	N/A	Neuron-optimal	Astrocyte-optimal	NA	NA
72	6513	ENSG00000117394	72.1.1	Slc2a1	ENSMUSG00000028645	solute carrier family 2 (facilitated glucose transporter), member 1 [Source:MGI Symbol;Acc:MGI:95755]	Neuron-optimal	Astrocyte-optimal	NA	NA
73	66035	ENSG00000133460	73.1.1	N/A	N/A	N/A	Neuron-optimal	Astrocyte-optimal	NA	NA
74	6514	ENSG00000163581	74.1.1	Slc2a2	ENSMUSG00000027690	solute carrier family 2 (facilitated glucose transporter), member 2 [Source:MGI Symbol;Acc:MGI:1095438]	Neuron-optimal	Astrocyte-optimal	NA	NA
75	155184	ENSG00000197241	75.1.1	Slc2a7	ENSMUSG00000062064	solute carrier family 2 (facilitated glucose transporter), member 7 [Source:MGI Symbol;Acc:MGI:3650865]	Neuron-optimal	Astrocyte-optimal	NA	NA
76	29988	ENSG00000136856	76.1.1	Slc2a8	ENSMUSG00000026791	solute carrier family 2, (facilitated glucose transporter), member 8 [Source:MGI Symbol;Acc:MGI:1860103]	Neuron-optimal	Astrocyte-optimal	NA	NA
77	81031	ENSG00000197496	77.1.1	Slc2a10	ENSMUSG00000027661	solute carrier family 2 (facilitated glucose transporter), member 10 [Source:MGI Symbol;Acc:MGI:2156687]	Neuron-optimal	Astrocyte-optimal	NA	NA
78	56606	ENSG00000109667	78.1.1	Slc2a9	ENSMUSG00000005107	solute carrier family 2 (facilitated glucose transporter), member 9 [Source:MGI Symbol;Acc:MGI:2152844]	Neuron-optimal	Astrocyte-optimal	NA	NA
79	144195	ENSG00000173262	79.1.1	N/A	N/A	N/A	Neuron-optimal	Astrocyte-optimal	NA	NA
80	11182	ENSG00000160326	80.1.1	Slc2a6	ENSMUSG00000036067	solute carrier family 2 (facilitated glucose transporter), member 6 [Source:MGI Symbol;Acc:MGI:2443286]	Neuron-optimal	Astrocyte-optimal	NA	NA
81	154091	ENSG00000146411	81.1.1	Slc2a12	ENSMUSG00000037490	solute carrier family 2 (facilitated glucose transporter), member 12 [Source:MGI Symbol;Acc:MGI:3052471]	Neuron-optimal	Astrocyte-optimal	NA	NA
82	1594	ENSG00000111012	82.1.1	Cyp27b1	ENSMUSG00000006724	cytochrome P450, family 27, subfamily b, polypeptide 1 [Source:MGI Symbol;Acc:MGI:1098274]	NA	NA	Neuron-central	Astrocyte-central
83	1591	ENSG00000019186	83.1.1	Cyp24a1	ENSMUSG00000038567	cytochrome P450, family 24, subfamily a, polypeptide 1 [Source:MGI Symbol;Acc:MGI:88593]	NA	NA	Neuron-central	Astrocyte-central
84	26275	ENSG00000198130	84.1.1	Hibch	ENSMUSG00000041426	3-hydroxyisobutyryl-Coenzyme A hydrolase [Source:MGI Symbol;Acc:MGI:1923792]	NA	NA	Neuron-central	Astrocyte-central
85	8659	ENSG00000159423	85.1.1	Aldh4a1	ENSMUSG00000028737	aldehyde dehydrogenase 4 family, member A1 [Source:MGI Symbol;Acc:MGI:2443883]	NA	NA	Neuron-central	Astrocyte-central
86	219	ENSG00000137124	86.1.1	Aldh1b1	ENSMUSG00000035561	aldehyde dehydrogenase 1 family, member B1 [Source:MGI Symbol;Acc:MGI:1919785]	NA	Astrocyte-optimal	Neuron-central	Astrocyte-central
87	217	ENSG00000111275	87.1.1	Aldh2	ENSMUSG00000029455	aldehyde dehydrogenase 2, mitochondrial [Source:MGI Symbol;Acc:MGI:99600]	NA	Astrocyte-optimal	Neuron-central	Astrocyte-central
88	60496	ENSG00000149313	88.1.1	Aasdhppt	ENSMUSG00000025894	aminoadipate-semialdehyde dehydrogenase-phosphopantetheinyl transferase [Source:MGI Symbol;Acc:MGI:1914868]	NA	NA	Neuron-central	Astrocyte-central
89	9194	ENSG00000118596	89.1.1	Slc16a7	ENSMUSG00000020102	solute carrier family 16 (monocarboxylic acid transporters), member 7 [Source:MGI Symbol;Acc:MGI:1330284]	NA	NA	Neuron-central	Astrocyte-central
90	11164	ENSG00000165609	90.1.1	Nudt5	ENSMUSG00000025817	nudix (nucleoside diphosphate linked moiety X)-type motif 5 [Source:MGI Symbol;Acc:MGI:1858232]	NA	Astrocyte-optimal	Neuron-central	Astrocyte-central
91	53343	ENSG00000170502	91.1.1	Nudt9	ENSMUSG00000029310	nudix (nucleoside diphosphate linked moiety X)-type motif 9 [Source:MGI Symbol;Acc:MGI:1921417]	NA	Astrocyte-optimal	Neuron-central	Astrocyte-central
92	8854	ENSG00000128918	92.1.1	Aldh1a2	ENSMUSG00000013584	aldehyde dehydrogenase family 1, subfamily A2 [Source:MGI Symbol;Acc:MGI:107928]	NA	Astrocyte-optimal	Neuron-central	Astrocyte-central
93	501	ENSG00000164904	93.1.1	Aldh7a1	ENSMUSG00000053644	aldehyde dehydrogenase family 7, member A1 [Source:MGI Symbol;Acc:MGI:108186]	NA	Astrocyte-optimal	Neuron-central	Astrocyte-central
94	224	ENSG00000072210	94.1.1	Aldh3a2	ENSMUSG00000010025	aldehyde dehydrogenase family 3, subfamily A2 [Source:MGI Symbol;Acc:MGI:1353452]	NA	Astrocyte-optimal	Neuron-central	Astrocyte-central
95	223	ENSG00000143149	95.1.1	Aldh9a1	ENSMUSG00000026687	aldehyde dehydrogenase 9, subfamily A1 [Source:MGI Symbol;Acc:MGI:1861622]	NA	Astrocyte-optimal	Neuron-central	Astrocyte-central
96	216	ENSG00000165092	96.1.1	Aldh1a7	ENSMUSG00000024747	aldehyde dehydrogenase family 1, subfamily A7 [Source:MGI Symbol;Acc:MGI:1347050]	NA	Astrocyte-optimal	Neuron-central	Astrocyte-central
96	216	ENSG00000165092	96.1.2	Aldh1a1	ENSMUSG00000053279	aldehyde dehydrogenase family 1, subfamily A1 [Source:MGI Symbol;Acc:MGI:1353450]	NA	Astrocyte-optimal	Neuron-central	Astrocyte-central
97	221	ENSG00000006534	97.1.1	Aldh3b1	ENSMUSG00000024885	aldehyde dehydrogenase 3 family, member B1 [Source:MGI Symbol;Acc:MGI:1914939]	NA	Astrocyte-optimal	Neuron-central	Astrocyte-central
98	220	ENSG00000184254	98.1.1	Aldh1a3	ENSMUSG00000015134	aldehyde dehydrogenase family 1, subfamily A3 [Source:MGI Symbol;Acc:MGI:1861722]	NA	Astrocyte-optimal	Neuron-central	Astrocyte-central
99	218	ENSG00000108602	99.1.1	Aldh3a1	ENSMUSG00000019102	aldehyde dehydrogenase family 3, subfamily A1 [Source:MGI Symbol;Acc:MGI:1353451]	NA	Astrocyte-optimal	Neuron-central	Astrocyte-central
100	222	ENSG00000132746	100.1.1	Aldh3b3	ENSMUSG00000037263	aldehyde dehydrogenase 3 family, member B3 [Source:MGI Symbol;Acc:MGI:1920708]	NA	Astrocyte-optimal	Neuron-central	Astrocyte-central
100	222	ENSG00000132746	100.1.2	Aldh3b2	ENSMUSG00000075296	aldehyde dehydrogenase 3 family, member B2 [Source:MGI Symbol;Acc:MGI:2147613]	NA	Astrocyte-optimal	Neuron-central	Astrocyte-central
101	83884	ENSG00000120329	101.1.1	Slc25a2	ENSMUSG00000050304	solute carrier family 25 (mitochondrial carrier, ornithine transporter) member 2 [Source:MGI Symbol;Acc:MGI:2137907]	NA	NA	Neuron-central	Astrocyte-central
102	10166	ENSG00000102743	102.1.1	Slc25a15	ENSMUSG00000031482	solute carrier family 25 (mitochondrial carrier ornithine transporter), member 15 [Source:MGI Symbol;Acc:MGI:1342274]	NA	NA	Neuron-central	Astrocyte-central
103	10229	ENSG00000167186	103.1.1	Coq7	ENSMUSG00000030652	demethyl-Q 7 [Source:MGI Symbol;Acc:MGI:107207]	NA	NA	Neuron-central	Astrocyte-central
104	3704	ENSG00000125877	104.1.1	Itpa	ENSMUSG00000074797	inosine triphosphatase (nucleoside triphosphate pyrophosphatase) [Source:MGI Symbol;Acc:MGI:96622]	NA	NA	Neuron-central	Astrocyte-central
105	1854	ENSG00000128951	105.1.1	Dut	ENSMUSG00000027203	deoxyuridine triphosphatase [Source:MGI Symbol;Acc:MGI:1346051]	NA	NA	Neuron-central	Astrocyte-central
106	2356	ENSG00000136877	106.1.1	Fpgs	ENSMUSG00000009566	folylpolyglutamyl synthetase [Source:MGI Symbol;Acc:MGI:95576]	NA	Astrocyte-optimal	Neuron-central	Astrocyte-central
107	5832	ENSG00000059573	107.1.1	Aldh18a1	ENSMUSG00000025007	aldehyde dehydrogenase 18 family, member A1 [Source:MGI Symbol;Acc:MGI:1888908]	NA	NA	Neuron-central	Astrocyte-central
108	4329	ENSG00000119711	108.1.1	Aldh6a1	ENSMUSG00000021238	aldehyde dehydrogenase family 6, subfamily A1 [Source:MGI Symbol;Acc:MGI:1915077]	NA	NA	Neuron-central	Astrocyte-central
109	7915	ENSG00000112294	109.1.1	Aldh5a1	ENSMUSG00000035936	aldhehyde dehydrogenase family 5, subfamily A1 [Source:MGI Symbol;Acc:MGI:2441982]	NA	NA	Neuron-central	Astrocyte-central
110	2746	ENSG00000148672	110.1.1	N/A	N/A	N/A	NA	NA	Neuron-central	Astrocyte-central
111	2747	ENSG00000182890	111.1.1	N/A	N/A	N/A	NA	NA	Neuron-central	Astrocyte-central
112	2639	ENSG00000105607	112.1.1	Gcdh	ENSMUSG00000003809	glutaryl-Coenzyme A dehydrogenase [Source:MGI Symbol;Acc:MGI:104541]	NA	NA	Neuron-central	Astrocyte-central
113	83733	ENSG00000182902	113.1.1	Slc25a18	ENSMUSG00000004902	solute carrier family 25 (mitochondrial carrier), member 18 [Source:MGI Symbol;Acc:MGI:1919053]	NA	NA	Neuron-central	Astrocyte-central
114	79751	ENSG00000177542	114.1.1	Slc25a22	ENSMUSG00000019082	solute carrier family 25 (mitochondrial carrier, glutamate), member 22 [Source:MGI Symbol;Acc:MGI:1915517]	NA	NA	Neuron-central	Astrocyte-central
115	3029	ENSG00000063854	115.1.1	Hagh	ENSMUSG00000024158	hydroxyacyl glutathione hydrolase [Source:MGI Symbol;Acc:MGI:95745]	NA	NA	Neuron-central	Astrocyte-central
116	84264	ENSG00000103253	116.1.1	Haghl	ENSMUSG00000061046	hydroxyacylglutathione hydrolase-like [Source:MGI Symbol;Acc:MGI:1919877]	NA	NA	Neuron-central	Astrocyte-central
117	7352	ENSG00000175564	117.1.1	Ucp3	ENSMUSG00000032942	uncoupling protein 3 (mitochondrial, proton carrier) [Source:MGI Symbol;Acc:MGI:1099787]	NA	NA	Neuron-central	Astrocyte-central
118	9016	ENSG00000102078	118.1.1	Slc25a14	ENSMUSG00000031105	solute carrier family 25 (mitochondrial carrier, brain), member 14 [Source:MGI Symbol;Acc:MGI:1330823]	NA	NA	Neuron-central	Astrocyte-central
119	9481	ENSG00000153291	119.1.1	Slc25a27	ENSMUSG00000023912	solute carrier family 25, member 27 [Source:MGI Symbol;Acc:MGI:1921261]	NA	NA	Neuron-central	Astrocyte-central
120	25902	ENSG00000120254	120.1.1	Mthfd1l	ENSMUSG00000040675	methylenetetrahydrofolate dehydrogenase (NADP+ dependent) 1-like [Source:MGI Symbol;Acc:MGI:1924836]	NA	NA	Neuron-central	Astrocyte-central
121	10797	ENSG00000065911	121.1.1	Mthfd2	ENSMUSG00000005667	methylenetetrahydrofolate dehydrogenase (NAD+ dependent), methenyltetrahydrofolate cyclohydrolase [Source:MGI Symbol;Acc:MGI:1338850]	NA	NA	Neuron-central	Astrocyte-central
122	4522	ENSG00000100714	122.1.1	Mthfd1	ENSMUSG00000021048	methylenetetrahydrofolate dehydrogenase (NADP+ dependent), methenyltetrahydrofolate cyclohydrolase, formyltetrahydrofolate synthase [Source:MGI Symbol;Acc:MGI:1342005]	NA	NA	Neuron-central	Astrocyte-central
123	100287639	ENSG00000244681	123.1.1	N/A	N/A	N/A	NA	NA	Neuron-central	Astrocyte-central
124	441024	ENSG00000163738	124.1.1	Mthfd2l	ENSMUSG00000029376	methylenetetrahydrofolate dehydrogenase (NADP+ dependent) 2-like [Source:MGI Symbol;Acc:MGI:1915871]	NA	NA	Neuron-central	Astrocyte-central
125	1583	ENSG00000140459	125.1.1	Cyp11a1	ENSMUSG00000032323	cytochrome P450, family 11, subfamily a, polypeptide 1 [Source:MGI Symbol;Acc:MGI:88582]	NA	NA	Neuron-central	Astrocyte-central
126	57818	ENSG00000152254	126.1.1	G6pc2	ENSMUSG00000005232	glucose-6-phosphatase, catalytic, 2 [Source:MGI Symbol;Acc:MGI:1277193]	NA	Astrocyte-optimal	Neuron-central	Astrocyte-central
127	92579	ENSG00000141349	127.1.1	G6pc3	ENSMUSG00000034793	glucose 6 phosphatase, catalytic, 3 [Source:MGI Symbol;Acc:MGI:1915651]	NA	Astrocyte-optimal	Neuron-central	Astrocyte-central
128	2538	ENSG00000131482	128.1.1	G6pc	ENSMUSG00000078650	glucose-6-phosphatase, catalytic [Source:MGI Symbol;Acc:MGI:95607]	NA	Astrocyte-optimal	Neuron-central	Astrocyte-central
129	27068	ENSG00000138777	129.1.1	Ppa2	ENSMUSG00000028013	pyrophosphatase (inorganic) 2 [Source:MGI Symbol;Acc:MGI:1922026]	NA	Astrocyte-optimal	Neuron-central	Astrocyte-central
130	8612	ENSG00000141934	130.1.1	Plpp2	ENSMUSG00000052151	phospholipid phosphatase 2 [Source:MGI Symbol;Acc:MGI:1354945]	NA	Astrocyte-optimal	Neuron-central	Astrocyte-central
131	8613	ENSG00000162407	131.1.1	Plpp3	ENSMUSG00000028517	phospholipid phosphatase 3 [Source:MGI Symbol;Acc:MGI:1915166]	NA	Astrocyte-optimal	Neuron-central	Astrocyte-central
132	8611	ENSG00000067113	132.1.1	Plpp1	ENSMUSG00000021759	phospholipid phosphatase 1 [Source:MGI Symbol;Acc:MGI:108412]	NA	Astrocyte-optimal	Neuron-central	Astrocyte-central
133	64077	ENSG00000107902	133.1.1	Lhpp	ENSMUSG00000030946	phospholysine phosphohistidine inorganic pyrophosphate phosphatase [Source:MGI Symbol;Acc:MGI:1923679]	NA	Astrocyte-optimal	Neuron-central	Astrocyte-central
134	5464	ENSG00000180817	134.1.1	Ppa1	ENSMUSG00000020089	pyrophosphatase (inorganic) 1 [Source:MGI Symbol;Acc:MGI:97831]	NA	Astrocyte-optimal	Neuron-central	Astrocyte-central
135	10157	ENSG00000008311	135.1.1	Aass	ENSMUSG00000029695	aminoadipate-semialdehyde synthase [Source:MGI Symbol;Acc:MGI:1353573]	NA	NA	Neuron-central	Astrocyte-central
136	1593	ENSG00000135929	136.1.1	Cyp27a1	ENSMUSG00000026170	cytochrome P450, family 27, subfamily a, polypeptide 1 [Source:MGI Symbol;Acc:MGI:88594]	NA	NA	Neuron-central	Astrocyte-central
137	56985	ENSG00000170222	137.1.1	Adprm	ENSMUSG00000020910	ADP-ribose/CDP-alcohol diphosphatase, manganese dependent [Source:MGI Symbol;Acc:MGI:1913608]	NA	Astrocyte-optimal	NA	Astrocyte-central
138	7226	ENSG00000142185	138.1.1	Trpm2	ENSMUSG00000009292	transient receptor potential cation channel, subfamily M, member 2 [Source:MGI Symbol;Acc:MGI:1351901]	NA	Astrocyte-optimal	NA	Astrocyte-central
139	3141	ENSG00000159267	139.1.1	Hlcs	ENSMUSG00000040820	holocarboxylase synthetase (biotin- [propriony-Coenzyme A-carboxylase (ATP-hydrolysing)] ligase) [Source:MGI Symbol;Acc:MGI:894646]	NA	Astrocyte-optimal	Neuron-central	Astrocyte-central
140	6520	ENSG00000168003	140.1.1	Slc3a2	ENSMUSG00000010095	solute carrier family 3 (activators of dibasic and neutral amino acid transport), member 2 [Source:MGI Symbol;Acc:MGI:96955]	NA	Astrocyte-optimal	NA	NA
141	56301	ENSG00000130876	141.1.1	Slc7a10	ENSMUSG00000030495	solute carrier family 7 (cationic amino acid transporter, y+ system), member 10 [Source:MGI Symbol;Acc:MGI:1858261]	NA	Astrocyte-optimal	NA	NA
142	8140	ENSG00000103257	142.1.1	Slc7a5	ENSMUSG00000040010	solute carrier family 7 (cationic amino acid transporter, y+ system), member 5 [Source:MGI Symbol;Acc:MGI:1298205]	NA	Astrocyte-optimal	NA	NA
143	6524	ENSG00000140675	143.1.1	Slc5a2	ENSMUSG00000030781	solute carrier family 5 (sodium/glucose cotransporter), member 2 [Source:MGI Symbol;Acc:MGI:2181411]	NA	Astrocyte-optimal	NA	NA
144	57030	ENSG00000104888	144.1.1	Slc17a7	ENSMUSG00000070570	solute carrier family 17 (sodium-dependent inorganic phosphate cotransporter), member 7 [Source:MGI Symbol;Acc:MGI:1920211]	NA	Astrocyte-optimal	NA	NA
145	246213	ENSG00000179520	145.1.1	N/A	N/A	N/A	NA	Astrocyte-optimal	NA	NA
146	57084	ENSG00000091664	146.1.1	Slc17a6	ENSMUSG00000030500	solute carrier family 17 (sodium-dependent inorganic phosphate cotransporter), member 6 [Source:MGI Symbol;Acc:MGI:2156052]	NA	Astrocyte-optimal	NA	NA
147	6505	ENSG00000106688	147.1.1	Slc1a1	ENSMUSG00000024935	solute carrier family 1 (neuronal/epithelial high affinity glutamate transporter, system Xag), member 1 [Source:MGI Symbol;Acc:MGI:105083]	NA	Astrocyte-optimal	NA	NA
148	6511	ENSG00000105143	148.1.1	Slc1a6	ENSMUSG00000005357	solute carrier family 1 (high affinity aspartate/glutamate transporter), member 6 [Source:MGI Symbol;Acc:MGI:1096331]	NA	Astrocyte-optimal	NA	NA
149	6512	ENSG00000162383	149.1.1	Slc1a7	ENSMUSG00000008932	solute carrier family 1 (glutamate transporter), member 7 [Source:MGI Symbol;Acc:MGI:2444087]	NA	Astrocyte-optimal	NA	NA
150	6507	ENSG00000079215	150.1.1	Slc1a3	ENSMUSG00000005360	solute carrier family 1 (glial high affinity glutamate transporter), member 3 [Source:MGI Symbol;Acc:MGI:99917]	NA	Astrocyte-optimal	NA	NA
151	6506	ENSG00000110436	151.1.1	Slc1a2	ENSMUSG00000005089	solute carrier family 1 (glial high affinity glutamate transporter), member 2 [Source:MGI Symbol;Acc:MGI:101931]	NA	Astrocyte-optimal	NA	NA
152	5091	ENSG00000173599	152.1.1	Pcx	ENSMUSG00000024892	pyruvate carboxylase [Source:MGI Symbol;Acc:MGI:97520]	NA	Astrocyte-optimal	NA	Astrocyte-central
153	2992	ENSG00000163754	153.1.1	Gyg	ENSMUSG00000019528	glycogenin [Source:MGI Symbol;Acc:MGI:1351614]	NA	Astrocyte-optimal	NA	NA
154	2997	ENSG00000104812	154.1.1	Gys1	ENSMUSG00000003865	glycogen synthase 1, muscle [Source:MGI Symbol;Acc:MGI:101805]	NA	Astrocyte-optimal	NA	NA
155	8908	ENSG00000056998	155.1.1	N/A	N/A	N/A	NA	Astrocyte-optimal	NA	NA
156	2998	ENSG00000111713	156.1.1	Gys2	ENSMUSG00000030244	glycogen synthase 2 [Source:MGI Symbol;Acc:MGI:2385254]	NA	Astrocyte-optimal	NA	NA
157	10991	ENSG00000188338	157.1.1	Slc38a3	ENSMUSG00000010064	solute carrier family 38, member 3 [Source:MGI Symbol;Acc:MGI:1923507]	NA	Astrocyte-optimal	NA	NA
158	92745	ENSG00000017483	158.1.1	Slc38a5	ENSMUSG00000031170	solute carrier family 38, member 5 [Source:MGI Symbol;Acc:MGI:2148066]	NA	Astrocyte-optimal	NA	NA
159	7351	ENSG00000175567	159.1.1	Ucp2	ENSMUSG00000033685	uncoupling protein 2 (mitochondrial, proton carrier) [Source:MGI Symbol;Acc:MGI:109354]	NA	NA	NA	Astrocyte-central
160	7350	ENSG00000109424	160.1.1	Ucp1	ENSMUSG00000031710	uncoupling protein 1 (mitochondrial, proton carrier) [Source:MGI Symbol;Acc:MGI:98894]	NA	NA	NA	Astrocyte-central
161	120227	ENSG00000186104	161.1.1	Cyp2r1	ENSMUSG00000030670	cytochrome P450, family 2, subfamily r, polypeptide 1 [Source:MGI Symbol;Acc:MGI:2449771]	NA	NA	NA	Astrocyte-central
162	5810	ENSG00000113456	162.1.1	Rad1	ENSMUSG00000022248	RAD1 checkpoint DNA exonuclease [Source:MGI Symbol;Acc:MGI:1316678]	NA	NA	NA	Astrocyte-central
163	5883	ENSG00000172613	163.1.1	Rad9a	ENSMUSG00000024824	RAD9 checkpoint clamp component A [Source:MGI Symbol;Acc:MGI:1328356]	NA	NA	NA	Astrocyte-central
164	11219	ENSG00000183479	164.1.1	Trex2	ENSMUSG00000031372	three prime repair exonuclease 2 [Source:MGI Symbol;Acc:MGI:1346343]	NA	NA	NA	Astrocyte-central
165	11277	ENSG00000213689	165.1.1	Trex1	ENSMUSG00000049734	three prime repair exonuclease 1 [Source:MGI Symbol;Acc:MGI:1328317]	NA	NA	NA	Astrocyte-central
166	10840	ENSG00000144908	166.1.1	Aldh1l1	ENSMUSG00000030088	aldehyde dehydrogenase 1 family, member L1 [Source:MGI Symbol;Acc:MGI:1340024]	NA	NA	NA	Astrocyte-central
167	212	ENSG00000158578	167.1.1	Alas2	ENSMUSG00000025270	aminolevulinic acid synthase 2, erythroid [Source:MGI Symbol;Acc:MGI:87990]	NA	NA	Neuron-central	Astrocyte-central
168	23464	ENSG00000100116	168.1.1	Gcat	ENSMUSG00000006378	glycine C-acetyltransferase (2-amino-3-ketobutyrate-coenzyme A ligase) [Source:MGI Symbol;Acc:MGI:1349389]	NA	NA	Neuron-central	Astrocyte-central
168	23464	ENSG00000100116	168.1.2	Gcat	ENSMUSG00000116378	glycine C-acetyltransferase (2-amino-3-ketobutyrate-coenzyme A ligase) [Source:MGI Symbol;Acc:MGI:1349389]	NA	NA	Neuron-central	Astrocyte-central
169	211	ENSG00000023330	169.1.1	Alas1	ENSMUSG00000032786	aminolevulinic acid synthase 1 [Source:MGI Symbol;Acc:MGI:87989]	NA	NA	Neuron-central	Astrocyte-central
170	113451	ENSG00000142920	170.1.1	Azin2	ENSMUSG00000028789	antizyme inhibitor 2 [Source:MGI Symbol;Acc:MGI:2442093]	NA	NA	Neuron-central	Astrocyte-central
171	622	ENSG00000161267	171.1.1	Bdh1	ENSMUSG00000046598	3-hydroxybutyrate dehydrogenase, type 1 [Source:MGI Symbol;Acc:MGI:1919161]	NA	NA	Neuron-central	Astrocyte-central
172	166785	ENSG00000151611	172.1.1	Mmaa	ENSMUSG00000037022	methylmalonic aciduria (cobalamin deficiency) type A [Source:MGI Symbol;Acc:MGI:1923805]	NA	NA	Neuron-central	Astrocyte-central
173	8760	ENSG00000101290	173.1.1	Cds2	ENSMUSG00000058793	CDP-diacylglycerol synthase (phosphatidate cytidylyltransferase) 2 [Source:MGI Symbol;Acc:MGI:1332236]	NA	NA	Neuron-central	Astrocyte-central
174	1040	ENSG00000163624	174.1.1	Cds1	ENSMUSG00000029330	CDP-diacylglycerol synthase 1 [Source:MGI Symbol;Acc:MGI:1921846]	NA	NA	Neuron-central	Astrocyte-central
175	51805	ENSG00000132423	175.1.1	Coq3	ENSMUSG00000028247	coenzyme Q3 methyltransferase [Source:MGI Symbol;Acc:MGI:101813]	NA	NA	Neuron-central	Astrocyte-central
176	84274	ENSG00000110871	176.1.1	Coq5	ENSMUSG00000041733	coenzyme Q5 methyltransferase [Source:MGI Symbol;Acc:MGI:1098643]	NA	NA	Neuron-central	Astrocyte-central
177	7263	ENSG00000128311	177.1.1	Tst	ENSMUSG00000044986	thiosulfate sulfurtransferase, mitochondrial [Source:MGI Symbol;Acc:MGI:98852]	NA	NA	Neuron-central	Astrocyte-central
178	1716	ENSG00000114956	178.1.1	Dguok	ENSMUSG00000014554	deoxyguanosine kinase [Source:MGI Symbol;Acc:MGI:1351602]	NA	NA	Neuron-central	Astrocyte-central
179	7083	ENSG00000167900	179.1.1	Tk1	ENSMUSG00000025574	thymidine kinase 1 [Source:MGI Symbol;Acc:MGI:98763]	NA	NA	Neuron-central	Astrocyte-central
180	7084	ENSG00000166548	180.1.1	Tk2	ENSMUSG00000035824	thymidine kinase 2, mitochondrial [Source:MGI Symbol;Acc:MGI:1913266]	NA	NA	Neuron-central	Astrocyte-central
181	2235	ENSG00000066926	181.1.1	Fech	ENSMUSG00000024588	ferrochelatase [Source:MGI Symbol;Acc:MGI:95513]	NA	NA	Neuron-central	Astrocyte-central
182	2653	ENSG00000140905	182.1.1	N/A	N/A	N/A	NA	NA	Neuron-central	Astrocyte-central
183	275	ENSG00000145020	183.1.1	Amt	ENSMUSG00000032607	aminomethyltransferase [Source:MGI Symbol;Acc:MGI:3646700]	NA	NA	Neuron-central	Astrocyte-central
184	2731	ENSG00000178445	184.1.1	Gldc	ENSMUSG00000024827	glycine decarboxylase [Source:MGI Symbol;Acc:MGI:1341155]	NA	NA	Neuron-central	Astrocyte-central
185	6470	ENSG00000176974	185.1.1	Shmt1	ENSMUSG00000020534	serine hydroxymethyltransferase 1 (soluble) [Source:MGI Symbol;Acc:MGI:98299]	NA	NA	Neuron-central	Astrocyte-central
186	6472	ENSG00000182199	186.1.1	Shmt2	ENSMUSG00000025403	serine hydroxymethyltransferase 2 (mitochondrial) [Source:MGI Symbol;Acc:MGI:1277989]	NA	NA	Neuron-central	Astrocyte-central
187	2713	nan	187.1.1	N/A	N/A	N/A	NA	NA	Neuron-central	Astrocyte-central
188	2710	ENSG00000198814	188.1.1	Gk	ENSMUSG00000025059	glycerol kinase [Source:MGI Symbol;Acc:MGI:106594]	NA	NA	Neuron-central	Astrocyte-central
189	2712	ENSG00000196475	189.1.1	Gk2	ENSMUSG00000050553	glycerol kinase 2 [Source:MGI Symbol;Acc:MGI:1329027]	NA	NA	Neuron-central	Astrocyte-central
190	2936	ENSG00000104687	190.1.1	Gsr	ENSMUSG00000031584	glutathione reductase [Source:MGI Symbol;Acc:MGI:95804]	NA	NA	Neuron-central	Astrocyte-central
191	3032	ENSG00000138029	191.1.1	Hadhb	ENSMUSG00000059447	hydroxyacyl-CoA dehydrogenase trifunctional multienzyme complex subunit beta [Source:MGI Symbol;Acc:MGI:2136381]	NA	NA	Neuron-central	Astrocyte-central
192	3030	ENSG00000084754	192.1.1	Hadha	ENSMUSG00000025745	hydroxyacyl-CoA dehydrogenase trifunctional multienzyme complex subunit alpha [Source:MGI Symbol;Acc:MGI:2135593]	NA	NA	Neuron-central	Astrocyte-central
193	3033	ENSG00000138796	193.1.1	Hadh	ENSMUSG00000027984	hydroxyacyl-Coenzyme A dehydrogenase [Source:MGI Symbol;Acc:MGI:96009]	NA	NA	Neuron-central	Astrocyte-central
194	3028	ENSG00000072506	194.1.1	Hsd17b10	ENSMUSG00000025260	hydroxysteroid (17-beta) dehydrogenase 10 [Source:MGI Symbol;Acc:MGI:1333871]	NA	NA	Neuron-central	Astrocyte-central
195	1962	ENSG00000113790	195.1.1	Ehhadh	ENSMUSG00000022853	enoyl-Coenzyme A, hydratase/3-hydroxyacyl Coenzyme A dehydrogenase [Source:MGI Symbol;Acc:MGI:1277964]	NA	NA	Neuron-central	Astrocyte-central
196	11112	ENSG00000106049	196.1.1	Hibadh	ENSMUSG00000029776	3-hydroxyisobutyrate dehydrogenase [Source:MGI Symbol;Acc:MGI:1889802]	NA	NA	Neuron-central	Astrocyte-central
197	3945	ENSG00000111716	197.1.1	Ldhb	ENSMUSG00000030246	lactate dehydrogenase B [Source:MGI Symbol;Acc:MGI:96763]	NA	NA	Neuron-central	Astrocyte-central
198	3939	ENSG00000134333	198.1.1	Ldha	ENSMUSG00000063229	lactate dehydrogenase A [Source:MGI Symbol;Acc:MGI:96759]	NA	NA	Neuron-central	Astrocyte-central
199	197257	ENSG00000166816	199.1.1	Ldhd	ENSMUSG00000031958	lactate dehydrogenase D [Source:MGI Symbol;Acc:MGI:106428]	NA	NA	Neuron-central	Astrocyte-central
200	3948	ENSG00000166796	200.1.1	Ldhc	ENSMUSG00000030851	lactate dehydrogenase C [Source:MGI Symbol;Acc:MGI:96764]	NA	NA	Neuron-central	Astrocyte-central
201	160287	ENSG00000166800	201.1.1	N/A	N/A	N/A	NA	NA	Neuron-central	Astrocyte-central
202	55293	ENSG00000151116	202.1.1	Uevld	ENSMUSG00000043262	UEV and lactate/malate dehyrogenase domains [Source:MGI Symbol;Acc:MGI:1860490]	NA	NA	Neuron-central	Astrocyte-central
203	92483	ENSG00000171989	203.1.1	Ldhal6b	ENSMUSG00000101959	lactate dehydrogenase A-like 6B [Source:MGI Symbol;Acc:MGI:2146830]	NA	NA	Neuron-central	Astrocyte-central
204	64087	ENSG00000131844	204.1.1	Mccc2	ENSMUSG00000021646	methylcrotonoyl-Coenzyme A carboxylase 2 (beta) [Source:MGI Symbol;Acc:MGI:1925288]	NA	NA	Neuron-central	Astrocyte-central
205	56922	ENSG00000078070	205.1.1	Mccc1	ENSMUSG00000027709	methylcrotonoyl-Coenzyme A carboxylase 1 (alpha) [Source:MGI Symbol;Acc:MGI:1919289]	NA	NA	Neuron-central	Astrocyte-central
206	23417	ENSG00000103150	206.1.1	Mlycd	ENSMUSG00000074064	malonyl-CoA decarboxylase [Source:MGI Symbol;Acc:MGI:1928485]	NA	NA	Neuron-central	Astrocyte-central
207	349565	ENSG00000163864	207.1.1	Nmnat3	ENSMUSG00000032456	nicotinamide nucleotide adenylyltransferase 3 [Source:MGI Symbol;Acc:MGI:1921330]	NA	NA	Neuron-central	Astrocyte-central
208	5833	ENSG00000185813	208.1.1	Pcyt2	ENSMUSG00000025137	phosphate cytidylyltransferase 2, ethanolamine [Source:MGI Symbol;Acc:MGI:1915921]	NA	NA	Neuron-central	Astrocyte-central
209	10400	ENSG00000133027	209.1.1	Pemt	ENSMUSG00000000301	phosphatidylethanolamine N-methyltransferase [Source:MGI Symbol;Acc:MGI:104535]	NA	NA	Neuron-central	Astrocyte-central
210	122970	ENSG00000177465	210.1.1	Acot4	ENSMUSG00000052392	acyl-CoA thioesterase 4 [Source:MGI Symbol;Acc:MGI:2159621]	NA	NA	Neuron-central	Astrocyte-central
211	10005	ENSG00000101473	211.1.1	Acot8	ENSMUSG00000017307	acyl-CoA thioesterase 8 [Source:MGI Symbol;Acc:MGI:2158201]	NA	NA	Neuron-central	Astrocyte-central
212	55229	ENSG00000157881	212.1.1	Pank4	ENSMUSG00000029056	pantothenate kinase 4 [Source:MGI Symbol;Acc:MGI:2387466]	NA	NA	Neuron-central	Astrocyte-central
213	79646	ENSG00000120137	213.1.1	Pank3	ENSMUSG00000018846	pantothenate kinase 3 [Source:MGI Symbol;Acc:MGI:2387464]	NA	NA	Neuron-central	Astrocyte-central
214	80025	ENSG00000125779	214.1.1	Pank2	ENSMUSG00000037514	pantothenate kinase 2 [Source:MGI Symbol;Acc:MGI:1921700]	NA	NA	Neuron-central	Astrocyte-central
215	53354	ENSG00000152782	215.1.1	Pank1	ENSMUSG00000033610	pantothenate kinase 1 [Source:MGI Symbol;Acc:MGI:1922985]	NA	NA	Neuron-central	Astrocyte-central
216	5095	ENSG00000175198	216.1.1	Pcca	ENSMUSG00000041650	propionyl-Coenzyme A carboxylase, alpha polypeptide [Source:MGI Symbol;Acc:MGI:97499]	NA	NA	Neuron-central	Astrocyte-central
217	5096	ENSG00000114054	217.1.1	Pccb	ENSMUSG00000032527	propionyl Coenzyme A carboxylase, beta polypeptide [Source:MGI Symbol;Acc:MGI:1914154]	NA	NA	Neuron-central	Astrocyte-central
218	58510	ENSG00000250799	218.1.1	Prodh2	ENSMUSG00000036892	proline dehydrogenase (oxidase) 2 [Source:MGI Symbol;Acc:MGI:1929093]	NA	NA	Neuron-central	Astrocyte-central
219	5625	ENSG00000100033	219.1.1	Prodh	ENSMUSG00000003526	proline dehydrogenase [Source:MGI Symbol;Acc:MGI:97770]	NA	NA	Neuron-central	Astrocyte-central
220	6648	ENSG00000112096	220.1.1	Sod2	ENSMUSG00000006818	superoxide dismutase 2, mitochondrial [Source:MGI Symbol;Acc:MGI:98352]	NA	NA	Neuron-central	Astrocyte-central
221	6649	ENSG00000109610	221.1.1	Sod3	ENSMUSG00000072941	superoxide dismutase 3, extracellular [Source:MGI Symbol;Acc:MGI:103181]	NA	NA	Neuron-central	Astrocyte-central
222	6647	ENSG00000142168	222.1.1	Sod1	ENSMUSG00000022982	superoxide dismutase 1, soluble [Source:MGI Symbol;Acc:MGI:98351]	NA	NA	Neuron-central	Astrocyte-central
223	7296	ENSG00000198431	223.1.1	Txnrd1	ENSMUSG00000020250	thioredoxin reductase 1 [Source:MGI Symbol;Acc:MGI:1354175]	NA	NA	Neuron-central	NA
224	10587	ENSG00000184470	224.1.1	Txnrd2	ENSMUSG00000075704	thioredoxin reductase 2 [Source:MGI Symbol;Acc:MGI:1347023]	NA	NA	Neuron-central	NA
225	23761	ENSG00000241878	225.1.1	Pisd	ENSMUSG00000023452	phosphatidylserine decarboxylase [Source:MGI Symbol;Acc:MGI:2445114]	NA	NA	Neuron-central	Astrocyte-central
225	23761	ENSG00000241878	225.1.2	Gm20671	ENSMUSG00000093574	predicted gene 20671 [Source:MGI Symbol;Acc:MGI:5313118]	NA	NA	Neuron-central	Astrocyte-central
226	18	ENSG00000183044	226.1.1	Abat	ENSMUSG00000057880	4-aminobutyrate aminotransferase [Source:MGI Symbol;Acc:MGI:2443582]	NA	NA	NA	Astrocyte-central
227	64902	ENSG00000113492	227.1.1	Agxt2	ENSMUSG00000089678	alanine-glyoxylate aminotransferase 2 [Source:MGI Symbol;Acc:MGI:2146052]	NA	NA	NA	Astrocyte-central
228	4357	ENSG00000128309	228.1.1	Mpst	ENSMUSG00000071711	mercaptopyruvate sulfurtransferase [Source:MGI Symbol;Acc:MGI:2179733]	NA	NA	NA	Astrocyte-central
229	256356	ENSG00000175066	229.1.1	Gk5	ENSMUSG00000041440	glycerol kinase 5 (putative) [Source:MGI Symbol;Acc:MGI:2443336]	NA	NA	NA	Astrocyte-central
230	23057	ENSG00000157064	230.1.1	Nmnat2	ENSMUSG00000042751	nicotinamide nucleotide adenylyltransferase 2 [Source:MGI Symbol;Acc:MGI:2444155]	NA	NA	NA	Astrocyte-central
231	64802	ENSG00000173614	231.1.1	Nmnat1	ENSMUSG00000028992	nicotinamide nucleotide adenylyltransferase 1 [Source:MGI Symbol;Acc:MGI:1913704]	NA	NA	NA	Astrocyte-central

## Sheet: All DHG
Supplementary Table 3. Unique list of all differential hub genes, for both astrocyte and neuron, during neurotransmission and aging.
Official gene symbol	Gene Name	Ensembl Gene ID	Entrez Gene ID	Astrocyte neurotransmission (log2fold-change)	Astrocyte neurotransmission TBOA (log2fold-change)	Neuron neurotransmission (log2fold-change)	Astrocyte aging (age_coefficient)	Neuron aging (age_coefficient)	GOTERM_BP_ALL	GOTERM_CC_ALL	GOTERM_MF_ALL	INTERPRO	KEGG_PATHWAY	PFAM	REACTOME_PATHWAY	UP_TISSUE	UP_KEYWORDS	UP_SEQ_FEATURE	BIOCARTA	BIOGRID_INTERACTION	COG_ONTOLOGY	DIP	EC_NUMBER	INTACT	MINT	Neuron optimal genes	Astrocyte optimal genes	Neuron central genes	Astrocyte central genes
AACS	acetoacetyl-CoA synthetase(Aacs)	ENSMUSG00000029482	78894	NA	NA	-0.622704	NA	0.00647518	GO:0001678~cellular glucose homeostasis,GO:0001889~liver development,GO:0002790~peptide secretion,GO:0002791~regulation of peptide secretion,GO:0002793~positive regulation of peptide secretion,GO:0006082~organic acid metabolic process,GO:0006629~lipid metabolic process,GO:0006631~fatty acid metabolic process,GO:0006810~transport,GO:0006950~response to stress,GO:0007154~cell communication,GO:00072…	GO:0005622~intracellular,GO:0005623~cell,GO:0005737~cytoplasm,GO:0005829~cytosol,GO:0044424~intracellular part,GO:0044444~cytoplasmic part,GO:0044464~cell part,	GO:0000166~nucleotide binding,GO:0001882~nucleoside binding,GO:0001883~purine nucleoside binding,GO:0003824~catalytic activity,GO:0005488~binding,GO:0005524~ATP binding,GO:0016874~ligase activity,GO:0016877~ligase activity, forming carbon-sulfur bonds,GO:0016878~acid-thiol ligase activity,GO:0017076~purine nucleotide binding,GO:0030554~adenyl nucleotide binding,GO:0030729~acetoacetate-CoA ligase …	IPR000873:AMP-dependent synthetase/ligase,IPR005914:Acetoacetyl-CoA synthase,IPR020845:AMP-binding, conserved site,	mmu00280:Valine, leucine and isoleucine degradation,mmu00650:Butanoate metabolism,	PF00501:AMP-binding enzyme,	R-MMU-77111:R-MMU-77111,	Amnion,Bone marrow,Brain cortex,Diencephalon,Kidney,Liver,Mast cell,Stomach,Thalamus,	ATP-binding,Complete proteome,Cytoplasm,Fatty acid metabolism,Ligase,Lipid metabolism,Nucleotide-binding,Reference proteome,	chain:Acetoacetyl-CoA synthetase,modified residue,sequence conflict,		9618:Aacs~acetoacetyl-CoA synthetase,			6.2.1.16,	15364:high mobility group AT-hook 2(Hmga2),22627:tyrosine 3-monooxygenase/tryptophan 5-monooxygenase activation protein, epsilon polypeptide(Ywhae),		Neuron-optimal	NA	NA	NA
abat	4-aminobutyrate aminotransferase(Abat)	ENSMUSG00000057880	268860	NA	NA	NA	-0.0164984	-0.0118352	GO:0000003~reproduction,GO:0001505~regulation of neurotransmitter levels,GO:0001659~temperature homeostasis,GO:0001666~response to hypoxia,GO:0001775~cell activation,GO:0002790~peptide secretion,GO:0002791~regulation of peptide secretion,GO:0002793~positive regulation of peptide secretion,GO:0003008~system process,GO:0003012~muscle system process,GO:0003013~circulatory system process,GO:0006082~o…	GO:0005576~extracellular region,GO:0005622~intracellular,GO:0005623~cell,GO:0005737~cytoplasm,GO:0005739~mitochondrion,GO:0005759~mitochondrial matrix,GO:0031974~membrane-enclosed lumen,GO:0031982~vesicle,GO:0031988~membrane-bounded vesicle,GO:0032144~4-aminobutyrate transaminase complex,GO:0032991~macromolecular complex,GO:0042995~cell projection,GO:0043005~neuron projection,GO:0043226~organelle…	GO:0003824~catalytic activity,GO:0003867~4-aminobutyrate transaminase activity,GO:0005488~binding,GO:0005515~protein binding,GO:0008483~transaminase activity,GO:0016740~transferase activity,GO:0016769~transferase activity, transferring nitrogenous groups,GO:0019899~enzyme binding,GO:0030170~pyridoxal phosphate binding,GO:0032145~succinate-semialdehyde dehydrogenase binding,GO:0042802~identical pr…	IPR004631:4-aminobutyrate aminotransferase, eukaryotic,IPR005814:Aminotransferase class-III,IPR015421:Pyridoxal phosphate-dependent transferase, major region, subdomain 1,IPR015422:Pyridoxal phosphate-dependent transferase, major region, subdomain 2,IPR015424:Pyridoxal phosphate-dependent transferase,	mmu00250:Alanine, aspartate and glutamate metabolism,mmu00280:Valine, leucine and isoleucine degradation,mmu00410:beta-Alanine metabolism,mmu00640:Propanoate metabolism,mmu00650:Butanoate metabolism,mmu01100:Metabolic pathways,mmu04727:GABAergic synapse,	PF00202:Aminotransferase class-III,	R-MMU-916853:R-MMU-916853,	Activated spleen,Brain,Cerebellum,Head,Hippocampus,Liver,Placenta and extra embryonic tissue,	Acetylation,Alternative splicing,Aminotransferase,Complete proteome,Direct protein sequencing,Disulfide bond,Iron,Iron-sulfur,Metal-binding,Mitochondrion,Neurotransmitter degradation,Proteomics identification,Pyridoxal phosphate,Reference proteome,Transferase,Transit peptide,	chain:4-aminobutyrate aminotransferase, mitochondrial,modified residue,splice variant,transit peptide:Mitochondrion,	0	0	0	0	2.6.1.19,2.6.1.22,	100043456:predicted gene 10681(Gm10681),15495:hydroxy-delta-5-steroid dehydrogenase, 3 beta- and steroid delta-isomerase 4(Hsd3b4),22627:tyrosine 3-monooxygenase/tryptophan 5-monooxygenase activation protein, epsilon polypeptide(Ywhae),	0	NA	NA	NA	Astrocyte-central
ACO1	aconitase 1(Aco1)	ENSMUSG00000028405	11428	NA	NA	-1.24137	-0.0115812	NA	GO:0003008~system process,GO:0006082~organic acid metabolic process,GO:0006091~generation of precursor metabolites and energy,GO:0006099~tricarboxylic acid cycle,GO:0006101~citrate metabolic process,GO:0006417~regulation of translation,GO:0006807~nitrogen compound metabolic process,GO:0006810~transport,GO:0006873~cellular ion homeostasis,GO:0006875~cellular metal ion homeostasis,GO:0006879~cellul…	GO:0005576~extracellular region,GO:0005622~intracellular,GO:0005623~cell,GO:0005737~cytoplasm,GO:0005739~mitochondrion,GO:0005783~endoplasmic reticulum,GO:0005794~Golgi apparatus,GO:0005829~cytosol,GO:0012505~endomembrane system,GO:0031982~vesicle,GO:0031988~membrane-bounded vesicle,GO:0043226~organelle,GO:0043227~membrane-bounded organelle,GO:0043229~intracellular organelle,GO:0043230~extracellu…	GO:0003676~nucleic acid binding,GO:0003723~RNA binding,GO:0003729~mRNA binding,GO:0003824~catalytic activity,GO:0003994~aconitate hydratase activity,GO:0005488~binding,GO:0016829~lyase activity,GO:0016835~carbon-oxygen lyase activity,GO:0016836~hydro-lyase activity,GO:0030350~iron-responsive element binding,GO:0043167~ion binding,GO:0043169~cation binding,GO:0044822~poly(A) RNA binding,GO:0046872…	IPR000573:Aconitase A/isopropylmalate dehydratase small subunit, swivel,IPR001030:Aconitase/3-isopropylmalate dehydratase large subunit, alpha/beta/alpha,IPR006249:Aconitase/iron regulatory protein 2,IPR015928:Aconitase/3-isopropylmalate dehydratase, swivel,IPR015931:Aconitase/3-isopropylmalate dehydratase large subunit, alpha/beta/alpha, subdomain 1/3,IPR015932:Aconitase/3-isopropylmalate dehydr…	mmu00020:Citrate cycle (TCA cycle),mmu00630:Glyoxylate and dicarboxylate metabolism,mmu01100:Metabolic pathways,mmu01130:Biosynthesis of antibiotics,mmu01200:Carbon metabolism,mmu01210:2-Oxocarboxylic acid metabolism,mmu01230:Biosynthesis of amino acids,	PF00330:Aconitase family (aconitate hydratase),PF00694:Aconitase C-terminal domain,			4Fe-4S,Complete proteome,Cytoplasm,Iron,Iron-sulfur,Lyase,Metal-binding,Reference proteome,RNA-binding,Tricarboxylic acid cycle,	chain:Cytoplasmic aconitate hydratase,metal ion-binding site:Iron-sulfur (4Fe-4S),sequence conflict,		260305:Aco1~aconitase 1,			4.2.1.3,			Neuron-optimal	NA	NA	NA
aco2	aconitase 2, mitochondrial(Aco2)	ENSMUSG00000022477	11429	NA	NA	NA	-0.0346129	-0.0331254	GO:0006082~organic acid metabolic process,GO:0006091~generation of precursor metabolites and energy,GO:0006099~tricarboxylic acid cycle,GO:0006101~citrate metabolic process,GO:0006102~isocitrate metabolic process,GO:0008152~metabolic process,GO:0009060~aerobic respiration,GO:0009987~cellular process,GO:0015980~energy derivation by oxidation of organic compounds,GO:0019752~carboxylic acid metaboli…	GO:0005622~intracellular,GO:0005623~cell,GO:0005634~nucleus,GO:0005737~cytoplasm,GO:0005739~mitochondrion,GO:0043209~myelin sheath,GO:0043226~organelle,GO:0043227~membrane-bounded organelle,GO:0043229~intracellular organelle,GO:0043231~intracellular membrane-bounded organelle,GO:0044424~intracellular part,GO:0044444~cytoplasmic part,GO:0044464~cell part,	GO:0003824~catalytic activity,GO:0003994~aconitate hydratase activity,GO:0005488~binding,GO:0005506~iron ion binding,GO:0016829~lyase activity,GO:0016835~carbon-oxygen lyase activity,GO:0016836~hydro-lyase activity,GO:0043167~ion binding,GO:0043169~cation binding,GO:0046872~metal ion binding,GO:0046914~transition metal ion binding,GO:0051536~iron-sulfur cluster binding,GO:0051538~3 iron, 4 sulfur…	IPR000573:Aconitase A/isopropylmalate dehydratase small subunit, swivel,IPR001030:Aconitase/3-isopropylmalate dehydratase large subunit, alpha/beta/alpha,IPR006248:Aconitase, mitochondrial-like,IPR015928:Aconitase/3-isopropylmalate dehydratase, swivel,IPR015931:Aconitase/3-isopropylmalate dehydratase large subunit, alpha/beta/alpha, subdomain 1/3,IPR015932:Aconitase/3-isopropylmalate dehydratase …	mmu00020:Citrate cycle (TCA cycle),mmu00630:Glyoxylate and dicarboxylate metabolism,mmu01100:Metabolic pathways,mmu01130:Biosynthesis of antibiotics,mmu01200:Carbon metabolism,mmu01210:2-Oxocarboxylic acid metabolism,mmu01230:Biosynthesis of amino acids,	PF00330:Aconitase family (aconitate hydratase),PF00694:Aconitase C-terminal domain,	R-MMU-71403:R-MMU-71403,	Bone marrow,Brain,Heart,Hippocampus,Kidney,Liver,Mammary tumor,	4Fe-4S,Acetylation,Complete proteome,Direct protein sequencing,Iron,Iron-sulfur,Isopeptide bond,Lyase,Metal-binding,Mitochondrion,Phosphoprotein,Pyrrolidone carboxylic acid,Reference proteome,Transit peptide,Tricarboxylic acid cycle,	chain:Aconitate hydratase, mitochondrial,cross-link:Glycyl lysine isopeptide (Lys-Gly) (interchain with G-Cter in ubiquitin),metal ion-binding site:Iron-sulfur (4Fe-4S),modified residue,sequence conflict,transit peptide:Mitochondrion,	0	16531:Aco2~aconitase 2, mitochondrial,	0	0	4.2.1.3,	100043456:predicted gene 10681(Gm10681),13385:discs, large homolog 4 (Drosophila)(Dlg4),14812:glutamate receptor, ionotropic, NMDA2B (epsilon 2)(Grin2b),15495:hydroxy-delta-5-steroid dehydrogenase, 3 beta- and steroid delta-isomerase 4(Hsd3b4),16438:inositol 1,4,5-trisphosphate receptor 1(Itpr1),16531:potassium large conductance calcium-activated channel, subfamily M, alpha member 1(Kcnma1),22627…	100041194:AHNAK nucleoprotein 2(Ahnak2),100043813:ribosomal protein S27, retrogene(Rps27rt),100043876:predicted gene 4705(Gm4705),100609:NOL1/NOP2/Sun domain family, member 5(Nsun5),100678:phosphoserine phosphatase(Psph),100763:ubiquitin protein ligase E3C(Ube3c),100862468:NHP2-like protein 1(LOC100862468),101314:BRICK1, SCAR/WAVE actin-nucleating complex subunit(Brk1),102595:pleckstrin homology …	Neuron-optimal	NA	NA	NA
acot8	acyl-CoA thioesterase 8(Acot8)	ENSMUSG00000017307	170789	NA	NA	NA	-0.00703957	NA	GO:0006082~organic acid metabolic process,GO:0006637~acyl-CoA metabolic process,GO:0006732~coenzyme metabolic process,GO:0006790~sulfur compound metabolic process,GO:0006996~organelle organization,GO:0007031~peroxisome organization,GO:0008152~metabolic process,GO:0009056~catabolic process,GO:0009058~biosynthetic process,GO:0009059~macromolecule biosynthetic process,GO:0009100~glycoprotein metabol…	GO:0005622~intracellular,GO:0005623~cell,GO:0005737~cytoplasm,GO:0005739~mitochondrion,GO:0005777~peroxisome,GO:0005782~peroxisomal matrix,GO:0031907~microbody lumen,GO:0031974~membrane-enclosed lumen,GO:0042579~microbody,GO:0043226~organelle,GO:0043227~membrane-bounded organelle,GO:0043229~intracellular organelle,GO:0043231~intracellular membrane-bounded organelle,GO:0043233~organelle lumen,GO:0…	GO:0003824~catalytic activity,GO:0005102~receptor binding,GO:0005488~binding,GO:0005515~protein binding,GO:0016289~CoA hydrolase activity,GO:0016290~palmitoyl-CoA hydrolase activity,GO:0016787~hydrolase activity,GO:0016788~hydrolase activity, acting on ester bonds,GO:0016790~thiolester hydrolase activity,GO:0033882~choloyl-CoA hydrolase activity,GO:0047617~acyl-CoA hydrolase activity,GO:0052689~c…	IPR003703:Acyl-CoA thioesterase,	mmu00120:Primary bile acid biosynthesis,mmu01100:Metabolic pathways,mmu04146:Peroxisome,	0	R-MMU-193368:R-MMU-193368,R-MMU-2046106:R-MMU-2046106,R-MMU-389887:R-MMU-389887,R-MMU-390247:R-MMU-390247,R-MMU-75105:R-MMU-75105,	Bone marrow,Cecum,Liver,	Complete proteome,Cytoplasm,Hydrolase,Peroxisome,Peroxisome biogenesis,Proteomics identification,Reference proteome,Serine esterase,	active site:Charge relay system,chain:Acyl-coenzyme A thioesterase 8,modified residue,sequence conflict,short sequence motif:Microbody targeting signal,	0	0	0	0	3.1.2.27,	22627:tyrosine 3-monooxygenase/tryptophan 5-monooxygenase activation protein, epsilon polypeptide(Ywhae),	0	NA	NA	Neuron-central	Astrocyte-central
ACSS1	acyl-CoA synthetase short-chain family member 1(Acss1)	ENSMUSG00000027452	68738	-0.381914	-0.910371	1.25014	NA	NA	GO:0006082~organic acid metabolic process,GO:0006083~acetate metabolic process,GO:0006084~acetyl-CoA metabolic process,GO:0006085~acetyl-CoA biosynthetic process,GO:0006629~lipid metabolic process,GO:0006631~fatty acid metabolic process,GO:0006633~fatty acid biosynthetic process,GO:0006637~acyl-CoA metabolic process,GO:0006732~coenzyme metabolic process,GO:0006790~sulfur compound metabolic proces…	GO:0005622~intracellular,GO:0005623~cell,GO:0005737~cytoplasm,GO:0005739~mitochondrion,GO:0005759~mitochondrial matrix,GO:0031974~membrane-enclosed lumen,GO:0043226~organelle,GO:0043227~membrane-bounded organelle,GO:0043229~intracellular organelle,GO:0043231~intracellular membrane-bounded organelle,GO:0043233~organelle lumen,GO:0044422~organelle part,GO:0044424~intracellular part,GO:0044429~mitoc…	GO:0000166~nucleotide binding,GO:0001882~nucleoside binding,GO:0001883~purine nucleoside binding,GO:0003824~catalytic activity,GO:0003987~acetate-CoA ligase activity,GO:0005488~binding,GO:0005524~ATP binding,GO:0016208~AMP binding,GO:0016405~CoA-ligase activity,GO:0016874~ligase activity,GO:0016877~ligase activity, forming carbon-sulfur bonds,GO:0016878~acid-thiol ligase activity,GO:0017076~purin…	IPR000873:AMP-dependent synthetase/ligase,IPR011904:Acetate-CoA ligase,IPR020845:AMP-binding, conserved site,IPR025110:Domain of unknown function DUF4009,	mmu00010:Glycolysis / Gluconeogenesis,mmu00620:Pyruvate metabolism,mmu00640:Propanoate metabolism,mmu01100:Metabolic pathways,mmu01130:Biosynthesis of antibiotics,mmu01200:Carbon metabolism,	PF00501:AMP-binding enzyme,PF13193:AMP-binding enzyme C-terminal domain,	R-MMU-71384:R-MMU-71384,	Activated spleen,Amnion,Fetal brain,Inner ear,Mammary tumor. C3,Mammary tumor. Metallothionien-TGF alpha model. 10 month old virgin mouse. Taken by biopsy.,Salivary gland,Thymus,	Acetylation,ATP-binding,Complete proteome,Ligase,Mitochondrion,Nucleotide-binding,Reference proteome,Transit peptide,	chain:Acetyl-coenzyme A synthetase 2-like, mitochondrial,modified residue,sequence conflict,transit peptide:Mitochondrion,		3028:Acss1~acyl-CoA synthetase short-chain family member 1,			6.2.1.1,	100043456:predicted gene 10681(Gm10681),15495:hydroxy-delta-5-steroid dehydrogenase, 3 beta- and steroid delta-isomerase 4(Hsd3b4),22627:tyrosine 3-monooxygenase/tryptophan 5-monooxygenase activation protein, epsilon polypeptide(Ywhae),		Neuron-optimal	NA	Neuron-central	Astrocyte-central
ALAS1	aminolevulinic acid synthase 1(Alas1)	ENSMUSG00000032786	11655	NA	NA	-0.713731	NA	-0.0122585	GO:0006725~cellular aromatic compound metabolic process,GO:0006778~porphyrin-containing compound metabolic process,GO:0006779~porphyrin-containing compound biosynthetic process,GO:0006782~protoporphyrinogen IX biosynthetic process,GO:0006783~heme biosynthetic process,GO:0006807~nitrogen compound metabolic process,GO:0008152~metabolic process,GO:0009058~biosynthetic process,GO:0009987~cellular pro…	GO:0005622~intracellular,GO:0005623~cell,GO:0005634~nucleus,GO:0005654~nucleoplasm,GO:0005737~cytoplasm,GO:0005739~mitochondrion,GO:0005759~mitochondrial matrix,GO:0031974~membrane-enclosed lumen,GO:0031981~nuclear lumen,GO:0043226~organelle,GO:0043227~membrane-bounded organelle,GO:0043229~intracellular organelle,GO:0043231~intracellular membrane-bounded organelle,GO:0043233~organelle lumen,GO:00…	GO:0003824~catalytic activity,GO:0003870~5-aminolevulinate synthase activity,GO:0005488~binding,GO:0016410~N-acyltransferase activity,GO:0016740~transferase activity,GO:0016746~transferase activity, transferring acyl groups,GO:0016747~transferase activity, transferring acyl groups other than amino-acyl groups,GO:0016748~succinyltransferase activity,GO:0016749~N-succinyltransferase activity,GO:003…	IPR001917:Aminotransferase, class-II, pyridoxal-phosphate binding site,IPR004839:Aminotransferase, class I/classII,IPR010961:Tetrapyrrole biosynthesis, 5-aminolevulinic acid synthase,IPR015118:5-aminolevulinate synthase presequence,IPR015421:Pyridoxal phosphate-dependent transferase, major region, subdomain 1,IPR015422:Pyridoxal phosphate-dependent transferase, major region, subdomain 2,IPR015424…	mmu00260:Glycine, serine and threonine metabolism,mmu00860:Porphyrin and chlorophyll metabolism,mmu01100:Metabolic pathways,	PF00155:Aminotransferase class I and II,PF09029:5-aminolevulinate synthase presequence,	R-MMU-189451:R-MMU-189451,	Liver,Testis,	Acyltransferase,Complete proteome,Heme biosynthesis,Mitochondrion,Proteomics identification,Pyridoxal phosphate,Reference proteome,Transferase,Transit peptide,	chain:5-aminolevulinate synthase, nonspecific, mitochondrial,modified residue,sequence conflict,transit peptide:Mitochondrion,	0	0	0	0	2.3.1.37,	0	0	NA	NA	Neuron-central	Astrocyte-central
alas2	aminolevulinic acid synthase 2, erythroid(Alas2)	ENSMUSG00000025270	11656	NA	NA	NA	NA	0.00916339	GO:0001666~response to hypoxia,GO:0002262~myeloid cell homeostasis,GO:0002376~immune system process,GO:0002520~immune system development,GO:0006725~cellular aromatic compound metabolic process,GO:0006778~porphyrin-containing compound metabolic process,GO:0006779~porphyrin-containing compound biosynthetic process,GO:0006782~protoporphyrinogen IX biosynthetic process,GO:0006783~heme biosynthetic pr…	GO:0005622~intracellular,GO:0005623~cell,GO:0005737~cytoplasm,GO:0005739~mitochondrion,GO:0005740~mitochondrial envelope,GO:0005743~mitochondrial inner membrane,GO:0005759~mitochondrial matrix,GO:0016020~membrane,GO:0019866~organelle inner membrane,GO:0031090~organelle membrane,GO:0031966~mitochondrial membrane,GO:0031967~organelle envelope,GO:0031974~membrane-enclosed lumen,GO:0031975~envelope,G…	GO:0003824~catalytic activity,GO:0003870~5-aminolevulinate synthase activity,GO:0005488~binding,GO:0016410~N-acyltransferase activity,GO:0016594~glycine binding,GO:0016597~amino acid binding,GO:0016740~transferase activity,GO:0016746~transferase activity, transferring acyl groups,GO:0016747~transferase activity, transferring acyl groups other than amino-acyl groups,GO:0016748~succinyltransferase …	IPR001917:Aminotransferase, class-II, pyridoxal-phosphate binding site,IPR004839:Aminotransferase, class I/classII,IPR010961:Tetrapyrrole biosynthesis, 5-aminolevulinic acid synthase,IPR015118:5-aminolevulinate synthase presequence,IPR015421:Pyridoxal phosphate-dependent transferase, major region, subdomain 1,IPR015422:Pyridoxal phosphate-dependent transferase, major region, subdomain 2,IPR015424…	mmu00260:Glycine, serine and threonine metabolism,mmu00860:Porphyrin and chlorophyll metabolism,mmu01100:Metabolic pathways,	PF00155:Aminotransferase class I and II,PF09029:5-aminolevulinate synthase presequence,	R-MMU-189451:R-MMU-189451,	Activated spleen,Brain,Erythroleukemia,Kidney,Liver,Spleen,	3D-structure,Acyltransferase,Complete proteome,Heme biosynthesis,Mitochondrion,Pyridoxal phosphate,Reference proteome,Transferase,Transit peptide,	chain:5-aminolevulinate synthase, erythroid- specific, mitochondrial,helix,modified residue,mutagenesis site,sequence conflict,transit peptide:Mitochondrion,turn,	0	11656:Alas2~aminolevulinic acid synthase 2, erythroid,	Posttranslational modification, protein turnover, chaperones,	0	2.3.1.37,	0	0	NA	NA	Neuron-central	Astrocyte-central
aldh18a1	aldehyde dehydrogenase 18 family, member A1(Aldh18a1)	ENSMUSG00000025007	56454	NA	NA	NA	NA	-0.00537428	GO:0000052~citrulline metabolic process,GO:0006082~organic acid metabolic process,GO:0006520~cellular amino acid metabolic process,GO:0006536~glutamate metabolic process,GO:0006560~proline metabolic process,GO:0006561~proline biosynthetic process,GO:0006591~ornithine metabolic process,GO:0006592~ornithine biosynthetic process,GO:0006793~phosphorus metabolic process,GO:0006796~phosphate-containing…	GO:0005622~intracellular,GO:0005623~cell,GO:0005737~cytoplasm,GO:0005739~mitochondrion,GO:0005740~mitochondrial envelope,GO:0005743~mitochondrial inner membrane,GO:0016020~membrane,GO:0019866~organelle inner membrane,GO:0031090~organelle membrane,GO:0031966~mitochondrial membrane,GO:0031967~organelle envelope,GO:0031975~envelope,GO:0043226~organelle,GO:0043227~membrane-bounded organelle,GO:004322…	GO:0000166~nucleotide binding,GO:0001882~nucleoside binding,GO:0001883~purine nucleoside binding,GO:0003676~nucleic acid binding,GO:0003723~RNA binding,GO:0003824~catalytic activity,GO:0004349~glutamate 5-kinase activity,GO:0004350~glutamate-5-semialdehyde dehydrogenase activity,GO:0005488~binding,GO:0005515~protein binding,GO:0005524~ATP binding,GO:0016301~kinase activity,GO:0016491~oxidoreducta…	IPR000965:Gamma-glutamyl phosphate reductase GPR,IPR001048:Aspartate/glutamate/uridylate kinase,IPR001057:Glutamate/acetylglutamate kinase,IPR005715:Glutamate 5-kinase/delta-1-pyrroline-5-carboxylate synthase,IPR005766:Delta l-pyrroline-5-carboxylate synthetase,IPR015590:Aldehyde dehydrogenase domain,IPR016161:Aldehyde/histidinol dehydrogenase,IPR016162:Aldehyde dehydrogenase, N-terminal,IPR01616…	mmu00330:Arginine and proline metabolism,mmu01100:Metabolic pathways,mmu01230:Biosynthesis of amino acids,	PF00171:Aldehyde dehydrogenase family,PF00696:Amino acid kinase family,	R-MMU-70614:R-MMU-70614,	Bone marrow,Kidney,Mammary tumor. MMTV-LTR/INT3 model. 5 month old mouse. Taken by biopsy.,Salivary gland,Thymus,	Alternative splicing,Amino-acid biosynthesis,ATP-binding,Complete proteome,Kinase,Membrane,Mitochondrion,Mitochondrion inner membrane,Multifunctional enzyme,NADP,Nucleotide-binding,Oxidoreductase,Proline biosynthesis,Proteomics identification,Reference proteome,Transferase,	chain:Delta-1-pyrroline-5-carboxylate synthetase,region of interest:Gamma-glutamyl phosphate reductase,region of interest:Glutamate 5-kinase,splice variant,	0	13626:Aldh18a1~aldehyde dehydrogenase 18 family, member A1,	0	0	1.2.1.41,2.7.2.11,	19324:RAB1A, member RAS oncogene family(Rab1a),19329:RAB17, member RAS oncogene family(Rab17),19342:RAB4B, member RAS oncogene family(Rab4b),19345:RAB5C, member RAS oncogene family(Rab5c),22627:tyrosine 3-monooxygenase/tryptophan 5-monooxygenase activation protein, epsilon polypeptide(Ywhae),67844:RAB32, member RAS oncogene family(Rab32),72433:RAB38, member RAS oncogene family(Rab38),	0	NA	NA	Neuron-central	Astrocyte-central
aldh1a1	aldehyde dehydrogenase family 1, subfamily A1(Aldh1a1)	ENSMUSG00000053279	11668	NA	NA	NA	-0.0106792	NA	GO:0001523~retinoid metabolic process,GO:0001654~eye development,GO:0002009~morphogenesis of an epithelium,GO:0002072~optic cup morphogenesis involved in camera-type eye development,GO:0002138~retinoic acid biosynthetic process,GO:0006066~alcohol metabolic process,GO:0006082~organic acid metabolic process,GO:0006461~protein complex assembly,GO:0006629~lipid metabolic process,GO:0006720~isoprenoid…	GO:0005576~extracellular region,GO:0005622~intracellular,GO:0005623~cell,GO:0005634~nucleus,GO:0005737~cytoplasm,GO:0031982~vesicle,GO:0031988~membrane-bounded vesicle,GO:0043226~organelle,GO:0043227~membrane-bounded organelle,GO:0043229~intracellular organelle,GO:0043230~extracellular organelle,GO:0043231~intracellular membrane-bounded organelle,GO:0044421~extracellular region part,GO:0044424~in…	GO:0001758~retinal dehydrogenase activity,GO:0003824~catalytic activity,GO:0004028~3-chloroallyl aldehyde dehydrogenase activity,GO:0004029~aldehyde dehydrogenase (NAD) activity,GO:0005488~binding,GO:0005515~protein binding,GO:0016491~oxidoreductase activity,GO:0016620~oxidoreductase activity, acting on the aldehyde or oxo group of donors, NAD or NADP as acceptor,GO:0016903~oxidoreductase activit…	IPR015590:Aldehyde dehydrogenase domain,IPR016160:Aldehyde dehydrogenase, conserved site,IPR016161:Aldehyde/histidinol dehydrogenase,IPR016162:Aldehyde dehydrogenase, N-terminal,IPR016163:Aldehyde dehydrogenase, C-terminal,	mmu00830:Retinol metabolism,mmu01100:Metabolic pathways,	PF00171:Aldehyde dehydrogenase family,	R-MMU-5365859:R-MMU-5365859,R-MMU-70350:R-MMU-70350,R-MMU-71384:R-MMU-71384,	Colon,Embryonic retina,Liver,	Acetylation,Complete proteome,Cytoplasm,Direct protein sequencing,NAD,Oxidoreductase,Phosphoprotein,Reference proteome,	active site:Nucleophile,active site:Proton acceptor,chain:Retinal dehydrogenase 1,modified residue,nucleotide phosphate-binding region:NAD,region of interest:Antabuse binding,sequence conflict,site:Transition state stabilizer,	0	0	0	0	1.2.1.36,	101502:hydroxy-delta-5-steroid dehydrogenase, 3 beta- and steroid delta-isomerase 7(Hsd3b7),22627:tyrosine 3-monooxygenase/tryptophan 5-monooxygenase activation protein, epsilon polypeptide(Ywhae),54401:tyrosine 3-monooxygenase/tryptophan 5-monooxygenase activation protein, beta polypeptide(Ywhab),66171:6-phosphogluconolactonase(Pgls),	0	NA	Astrocyte-optimal	Neuron-central	Astrocyte-central
ALDH1B1	aldehyde dehydrogenase 1 family, member B1(Aldh1b1)	ENSMUSG00000035561	72535	NA	0.6005	-1.5706	NA	NA	GO:0006066~alcohol metabolic process,GO:0006067~ethanol metabolic process,GO:0006068~ethanol catabolic process,GO:0008152~metabolic process,GO:0009056~catabolic process,GO:0034308~primary alcohol metabolic process,GO:0034310~primary alcohol catabolic process,GO:0044281~small molecule metabolic process,GO:0044282~small molecule catabolic process,GO:0044699~single-organism process,GO:0044710~single…	GO:0005622~intracellular,GO:0005623~cell,GO:0005634~nucleus,GO:0005654~nucleoplasm,GO:0005737~cytoplasm,GO:0005739~mitochondrion,GO:0005759~mitochondrial matrix,GO:0031974~membrane-enclosed lumen,GO:0031981~nuclear lumen,GO:0043226~organelle,GO:0043227~membrane-bounded organelle,GO:0043229~intracellular organelle,GO:0043231~intracellular membrane-bounded organelle,GO:0043233~organelle lumen,GO:00…	GO:0003824~catalytic activity,GO:0004029~aldehyde dehydrogenase (NAD) activity,GO:0016491~oxidoreductase activity,GO:0016620~oxidoreductase activity, acting on the aldehyde or oxo group of donors, NAD or NADP as acceptor,GO:0016903~oxidoreductase activity, acting on the aldehyde or oxo group of donors,	IPR015590:Aldehyde dehydrogenase domain,IPR016160:Aldehyde dehydrogenase, conserved site,IPR016161:Aldehyde/histidinol dehydrogenase,IPR016162:Aldehyde dehydrogenase, N-terminal,IPR016163:Aldehyde dehydrogenase, C-terminal,	mmu00010:Glycolysis / Gluconeogenesis,mmu00053:Ascorbate and aldarate metabolism,mmu00071:Fatty acid degradation,mmu00280:Valine, leucine and isoleucine degradation,mmu00310:Lysine degradation,mmu00330:Arginine and proline metabolism,mmu00340:Histidine metabolism,mmu00380:Tryptophan metabolism,mmu00410:beta-Alanine metabolism,mmu00561:Glycerolipid metabolism,mmu00620:Pyruvate metabolism,mmu01100:…	PF00171:Aldehyde dehydrogenase family,	R-MMU-71384:R-MMU-71384,	Bone marrow,Brain,Colon,Embryo,Thymus,	Acetylation,Complete proteome,Mitochondrion,NAD,Oxidoreductase,Proteomics identification,Reference proteome,Signal,Transit peptide,	active site:Nucleophile,active site:Proton acceptor,chain:Aldehyde dehydrogenase X, mitochondrial,nucleotide phosphate-binding region:NAD,sequence conflict,site:Transition state stabilizer,transit peptide:Mitochondrion,					1.2.1.3,	22627:tyrosine 3-monooxygenase/tryptophan 5-monooxygenase activation protein, epsilon polypeptide(Ywhae),		NA	Astrocyte-optimal	Neuron-central	Astrocyte-central
ALDH3A2	aldehyde dehydrogenase family 3, subfamily A2(Aldh3a2)	ENSMUSG00000010025	11671	NA	NA	-0.558829	NA	-0.023125	GO:0000302~response to reactive oxygen species,GO:0006066~alcohol metabolic process,GO:0006081~cellular aldehyde metabolic process,GO:0006629~lipid metabolic process,GO:0006720~isoprenoid metabolic process,GO:0006721~terpenoid metabolic process,GO:0006950~response to stress,GO:0006979~response to oxidative stress,GO:0007275~multicellular organism development,GO:0007399~nervous system development,…	GO:0005576~extracellular region,GO:0005622~intracellular,GO:0005623~cell,GO:0005634~nucleus,GO:0005737~cytoplasm,GO:0005739~mitochondrion,GO:0005740~mitochondrial envelope,GO:0005743~mitochondrial inner membrane,GO:0005777~peroxisome,GO:0005778~peroxisomal membrane,GO:0005783~endoplasmic reticulum,GO:0005789~endoplasmic reticulum membrane,GO:0005829~cytosol,GO:0012505~endomembrane system,GO:00160…	GO:0003824~catalytic activity,GO:0004028~3-chloroallyl aldehyde dehydrogenase activity,GO:0004029~aldehyde dehydrogenase (NAD) activity,GO:0004030~aldehyde dehydrogenase [NAD(P)+] activity,GO:0016491~oxidoreductase activity,GO:0016614~oxidoreductase activity, acting on CH-OH group of donors,GO:0016620~oxidoreductase activity, acting on the aldehyde or oxo group of donors, NAD or NADP as acceptor,…	IPR012394:Aldehyde dehydrogenase NAD(P)-dependent,IPR015590:Aldehyde dehydrogenase domain,IPR016160:Aldehyde dehydrogenase, conserved site,IPR016161:Aldehyde/histidinol dehydrogenase,IPR016162:Aldehyde dehydrogenase, N-terminal,IPR016163:Aldehyde dehydrogenase, C-terminal,	mmu00010:Glycolysis / Gluconeogenesis,mmu00053:Ascorbate and aldarate metabolism,mmu00071:Fatty acid degradation,mmu00280:Valine, leucine and isoleucine degradation,mmu00310:Lysine degradation,mmu00330:Arginine and proline metabolism,mmu00340:Histidine metabolism,mmu00380:Tryptophan metabolism,mmu00410:beta-Alanine metabolism,mmu00561:Glycerolipid metabolism,mmu00620:Pyruvate metabolism,mmu01100:…	PF00171:Aldehyde dehydrogenase family,	R-MMU-1660661:R-MMU-1660661,R-MMU-389599:R-MMU-389599,	Bone marrow,Head,Liver,Mammary tumor. WAP-TGF alpha model. 7 months old,Olfactory brain,Spinal cord,Spinal ganglion,Stomach,Thymus,	Complete proteome,Endoplasmic reticulum,Membrane,NAD,Oxidoreductase,Phosphoprotein,Proteomics identification,Reference proteome,Transmembrane,Transmembrane helix,	chain:Fatty aldehyde dehydrogenase,nucleotide phosphate-binding region:NAD,short sequence motif:Prevents secretion from ER,topological domain:Cytoplasmic,transmembrane region,	0	0	0	0	1.2.1.3,	100043456:predicted gene 10681(Gm10681),101502:hydroxy-delta-5-steroid dehydrogenase, 3 beta- and steroid delta-isomerase 7(Hsd3b7),15495:hydroxy-delta-5-steroid dehydrogenase, 3 beta- and steroid delta-isomerase 4(Hsd3b4),22627:tyrosine 3-monooxygenase/tryptophan 5-monooxygenase activation protein, epsilon polypeptide(Ywhae),22631:tyrosine 3-monooxygenase/tryptophan 5-monooxygenase activation pr…	0	NA	Astrocyte-optimal	Neuron-central	Astrocyte-central
aldh5a1	aldhehyde dehydrogenase family 5, subfamily A1(Aldh5a1)	ENSMUSG00000035936	214579	NA	NA	NA	NA	0.00632327	GO:0001505~regulation of neurotransmitter levels,GO:0005975~carbohydrate metabolic process,GO:0005996~monosaccharide metabolic process,GO:0006006~glucose metabolic process,GO:0006082~organic acid metabolic process,GO:0006083~acetate metabolic process,GO:0006091~generation of precursor metabolites and energy,GO:0006105~succinate metabolic process,GO:0006461~protein complex assembly,GO:0006518~pept…	GO:0005622~intracellular,GO:0005623~cell,GO:0005737~cytoplasm,GO:0005739~mitochondrion,GO:0043226~organelle,GO:0043227~membrane-bounded organelle,GO:0043229~intracellular organelle,GO:0043231~intracellular membrane-bounded organelle,GO:0044424~intracellular part,GO:0044444~cytoplasmic part,GO:0044464~cell part,	GO:0000166~nucleotide binding,GO:0003824~catalytic activity,GO:0004029~aldehyde dehydrogenase (NAD) activity,GO:0004777~succinate-semialdehyde dehydrogenase (NAD+) activity,GO:0005488~binding,GO:0009013~succinate-semialdehyde dehydrogenase [NAD(P)+] activity,GO:0016491~oxidoreductase activity,GO:0016620~oxidoreductase activity, acting on the aldehyde or oxo group of donors, NAD or NADP as accepto…	IPR010102:Succinate semialdehyde dehydrogenase,IPR015590:Aldehyde dehydrogenase domain,IPR016160:Aldehyde dehydrogenase, conserved site,IPR016161:Aldehyde/histidinol dehydrogenase,IPR016162:Aldehyde dehydrogenase, N-terminal,IPR016163:Aldehyde dehydrogenase, C-terminal,	mmu00250:Alanine, aspartate and glutamate metabolism,mmu00650:Butanoate metabolism,mmu01100:Metabolic pathways,	PF00171:Aldehyde dehydrogenase family,	R-MMU-916853:R-MMU-916853,	Brain,Hippocampus,Kidney,	Acetylation,Complete proteome,Direct protein sequencing,Disulfide bond,Mitochondrion,NAD,Oxidoreductase,Phosphoprotein,Reference proteome,Transit peptide,	active site:Nucleophile,active site:Proton acceptor,binding site:NAD,binding site:Substrate,chain:Succinate-semialdehyde dehydrogenase, mitochondrial,disulfide bond,modified residue,nucleotide phosphate-binding region:NAD,site:Transition state stabilizer,transit peptide:Mitochondrion,	0	0	0	0	1.2.1.24,	100043456:predicted gene 10681(Gm10681),13385:discs, large homolog 4 (Drosophila)(Dlg4),15495:hydroxy-delta-5-steroid dehydrogenase, 3 beta- and steroid delta-isomerase 4(Hsd3b4),22627:tyrosine 3-monooxygenase/tryptophan 5-monooxygenase activation protein, epsilon polypeptide(Ywhae),	0	NA	NA	Neuron-central	Astrocyte-central
ALDH6A1	aldehyde dehydrogenase family 6, subfamily A1(Aldh6a1)	ENSMUSG00000021238	104776	NA	NA	-0.698189	-0.0241547	NA	GO:0006082~organic acid metabolic process,GO:0006139~nucleobase-containing compound metabolic process,GO:0006206~pyrimidine nucleobase metabolic process,GO:0006208~pyrimidine nucleobase catabolic process,GO:0006210~thymine catabolic process,GO:0006520~cellular amino acid metabolic process,GO:0006573~valine metabolic process,GO:0006574~valine catabolic process,GO:0006725~cellular aromatic compound…	GO:0005576~extracellular region,GO:0005622~intracellular,GO:0005623~cell,GO:0005634~nucleus,GO:0005654~nucleoplasm,GO:0005737~cytoplasm,GO:0005739~mitochondrion,GO:0031974~membrane-enclosed lumen,GO:0031981~nuclear lumen,GO:0031982~vesicle,GO:0031988~membrane-bounded vesicle,GO:0043226~organelle,GO:0043227~membrane-bounded organelle,GO:0043229~intracellular organelle,GO:0043230~extracellular orga…	GO:0003676~nucleic acid binding,GO:0003723~RNA binding,GO:0003824~catalytic activity,GO:0004029~aldehyde dehydrogenase (NAD) activity,GO:0004491~methylmalonate-semialdehyde dehydrogenase (acylating) activity,GO:0005488~binding,GO:0016491~oxidoreductase activity,GO:0016620~oxidoreductase activity, acting on the aldehyde or oxo group of donors, NAD or NADP as acceptor,GO:0016787~hydrolase activity,…	IPR010061:Methylmalonate-semialdehyde dehydrogenase,IPR015590:Aldehyde dehydrogenase domain,IPR016160:Aldehyde dehydrogenase, conserved site,IPR016161:Aldehyde/histidinol dehydrogenase,IPR016162:Aldehyde dehydrogenase, N-terminal,IPR016163:Aldehyde dehydrogenase, C-terminal,	mmu00280:Valine, leucine and isoleucine degradation,mmu00410:beta-Alanine metabolism,mmu00562:Inositol phosphate metabolism,mmu00640:Propanoate metabolism,mmu01100:Metabolic pathways,mmu01200:Carbon metabolism,	PF00171:Aldehyde dehydrogenase family,	R-MMU-70895:R-MMU-70895,	Cecum,Kidney,Liver,PCR rescued clones,Spleen,	Acetylation,Complete proteome,Mitochondrion,NAD,Oxidoreductase,Phosphoprotein,Reference proteome,Transit peptide,	active site:Nucleophile,binding site:NAD,chain:Methylmalonate-semialdehyde dehydrogenase [acylating], mitochondrial,modified residue,nucleotide phosphate-binding region:NAD,sequence conflict,transit peptide:Mitochondrion,	0	16531:Aldh6a1~aldehyde dehydrogenase family 6, subfamily A1,	0	0	1.2.1.18,1.2.1.27,	100043456:predicted gene 10681(Gm10681),15495:hydroxy-delta-5-steroid dehydrogenase, 3 beta- and steroid delta-isomerase 4(Hsd3b4),16531:potassium large conductance calcium-activated channel, subfamily M, alpha member 1(Kcnma1),22627:tyrosine 3-monooxygenase/tryptophan 5-monooxygenase activation protein, epsilon polypeptide(Ywhae),22631:tyrosine 3-monooxygenase/tryptophan 5-monooxygenase activati…	0	NA	NA	Neuron-central	Astrocyte-central
aldh7a1	aldehyde dehydrogenase family 7, member A1(Aldh7a1)	ENSMUSG00000053644	110695	NA	NA	NA	NA	-0.011807	GO:0006575~cellular modified amino acid metabolic process,GO:0006577~amino-acid betaine metabolic process,GO:0006578~amino-acid betaine biosynthetic process,GO:0006807~nitrogen compound metabolic process,GO:0008152~metabolic process,GO:0009058~biosynthetic process,GO:0009987~cellular process,GO:0019285~glycine betaine biosynthetic process from choline,GO:0019695~choline metabolic process,GO:00314…	GO:0005576~extracellular region,GO:0005622~intracellular,GO:0005623~cell,GO:0005634~nucleus,GO:0005737~cytoplasm,GO:0005739~mitochondrion,GO:0005829~cytosol,GO:0031982~vesicle,GO:0031988~membrane-bounded vesicle,GO:0043226~organelle,GO:0043227~membrane-bounded organelle,GO:0043229~intracellular organelle,GO:0043230~extracellular organelle,GO:0043231~intracellular membrane-bounded organelle,GO:004…	GO:0003824~catalytic activity,GO:0004029~aldehyde dehydrogenase (NAD) activity,GO:0004043~L-aminoadipate-semialdehyde dehydrogenase activity,GO:0008802~betaine-aldehyde dehydrogenase activity,GO:0016491~oxidoreductase activity,GO:0016620~oxidoreductase activity, acting on the aldehyde or oxo group of donors, NAD or NADP as acceptor,GO:0016903~oxidoreductase activity, acting on the aldehyde or oxo…	IPR015590:Aldehyde dehydrogenase domain,IPR016161:Aldehyde/histidinol dehydrogenase,IPR016162:Aldehyde dehydrogenase, N-terminal,IPR016163:Aldehyde dehydrogenase, C-terminal,	mmu00010:Glycolysis / Gluconeogenesis,mmu00053:Ascorbate and aldarate metabolism,mmu00071:Fatty acid degradation,mmu00260:Glycine, serine and threonine metabolism,mmu00280:Valine, leucine and isoleucine degradation,mmu00310:Lysine degradation,mmu00330:Arginine and proline metabolism,mmu00340:Histidine metabolism,mmu00380:Tryptophan metabolism,mmu00410:beta-Alanine metabolism,mmu00561:Glycerolipid…	PF00171:Aldehyde dehydrogenase family,	R-MMU-71064:R-MMU-71064,	Liver,Salivary gland,	Acetylation,Alternative splicing,Complete proteome,Cytoplasm,Mitochondrion,NAD,Nucleus,Oxidoreductase,Proteomics identification,Reference proteome,Transit peptide,	active site:Nucleophile,active site:Proton acceptor,chain:Alpha-aminoadipic semialdehyde dehydrogenase,nucleotide phosphate-binding region:NAD,site:Transition state stabilizer,	0	0	0	0	1.2.1.3,1.2.1.31,1.2.1.8,	100043456:predicted gene 10681(Gm10681),101502:hydroxy-delta-5-steroid dehydrogenase, 3 beta- and steroid delta-isomerase 7(Hsd3b7),15495:hydroxy-delta-5-steroid dehydrogenase, 3 beta- and steroid delta-isomerase 4(Hsd3b4),22627:tyrosine 3-monooxygenase/tryptophan 5-monooxygenase activation protein, epsilon polypeptide(Ywhae),66171:6-phosphogluconolactonase(Pgls),	0	NA	Astrocyte-optimal	Neuron-central	Astrocyte-central
ALDH9A1	aldehyde dehydrogenase 9, subfamily A1(Aldh9a1)	ENSMUSG00000026687	56752	NA	NA	-0.817278	NA	-0.0119384	GO:0001505~regulation of neurotransmitter levels,GO:0006081~cellular aldehyde metabolic process,GO:0006577~amino-acid betaine metabolic process,GO:0006578~amino-acid betaine biosynthetic process,GO:0006807~nitrogen compound metabolic process,GO:0008152~metabolic process,GO:0009058~biosynthetic process,GO:0009437~carnitine metabolic process,GO:0009987~cellular process,GO:0034641~cellular nitrogen …	GO:0005576~extracellular region,GO:0005622~intracellular,GO:0005623~cell,GO:0005737~cytoplasm,GO:0005739~mitochondrion,GO:0005829~cytosol,GO:0031982~vesicle,GO:0031988~membrane-bounded vesicle,GO:0043226~organelle,GO:0043227~membrane-bounded organelle,GO:0043229~intracellular organelle,GO:0043230~extracellular organelle,GO:0043231~intracellular membrane-bounded organelle,GO:0044421~extracellular …	GO:0000166~nucleotide binding,GO:0003824~catalytic activity,GO:0004029~aldehyde dehydrogenase (NAD) activity,GO:0005488~binding,GO:0005515~protein binding,GO:0016491~oxidoreductase activity,GO:0016620~oxidoreductase activity, acting on the aldehyde or oxo group of donors, NAD or NADP as acceptor,GO:0016903~oxidoreductase activity, acting on the aldehyde or oxo group of donors,GO:0019145~aminobuty…	IPR015590:Aldehyde dehydrogenase domain,IPR016160:Aldehyde dehydrogenase, conserved site,IPR016161:Aldehyde/histidinol dehydrogenase,IPR016162:Aldehyde dehydrogenase, N-terminal,IPR016163:Aldehyde dehydrogenase, C-terminal,	mmu00010:Glycolysis / Gluconeogenesis,mmu00053:Ascorbate and aldarate metabolism,mmu00071:Fatty acid degradation,mmu00280:Valine, leucine and isoleucine degradation,mmu00310:Lysine degradation,mmu00330:Arginine and proline metabolism,mmu00340:Histidine metabolism,mmu00380:Tryptophan metabolism,mmu00410:beta-Alanine metabolism,mmu00561:Glycerolipid metabolism,mmu00620:Pyruvate metabolism,mmu01100:…	PF00171:Aldehyde dehydrogenase family,	R-MMU-71262:R-MMU-71262,	Amnion,Bone marrow,Epididymis,Head,Hippocampus,Intestinal mucosa,Liver,Mammary tumor,	Acetylation,Complete proteome,Cytoplasm,Direct protein sequencing,NAD,Oxidoreductase,Proteomics identification,Reference proteome,Signal,	chain:4-trimethylaminobutyraldehyde dehydrogenase,modified residue,nucleotide phosphate-binding region:NAD,	0	0	0	0	1.2.1.3,1.2.1.47,	100043456:predicted gene 10681(Gm10681),15495:hydroxy-delta-5-steroid dehydrogenase, 3 beta- and steroid delta-isomerase 4(Hsd3b4),22627:tyrosine 3-monooxygenase/tryptophan 5-monooxygenase activation protein, epsilon polypeptide(Ywhae),66171:6-phosphogluconolactonase(Pgls),	0	NA	Astrocyte-optimal	Neuron-central	Astrocyte-central
AMT	aminomethyltransferase(Amt)	ENSMUSG00000032607	434437	NA	NA	-0.859762	NA	NA	GO:0006082~organic acid metabolic process,GO:0006520~cellular amino acid metabolic process,GO:0006544~glycine metabolic process,GO:0006546~glycine catabolic process,GO:0006807~nitrogen compound metabolic process,GO:0008152~metabolic process,GO:0009056~catabolic process,GO:0009063~cellular amino acid catabolic process,GO:0009069~serine family amino acid metabolic process,GO:0009071~serine family a…	GO:0005622~intracellular,GO:0005623~cell,GO:0005737~cytoplasm,GO:0005739~mitochondrion,GO:0043226~organelle,GO:0043227~membrane-bounded organelle,GO:0043229~intracellular organelle,GO:0043231~intracellular membrane-bounded organelle,GO:0044424~intracellular part,GO:0044444~cytoplasmic part,GO:0044464~cell part,	GO:0003824~catalytic activity,GO:0004047~aminomethyltransferase activity,GO:0008168~methyltransferase activity,GO:0008483~transaminase activity,GO:0016740~transferase activity,GO:0016741~transferase activity, transferring one-carbon groups,GO:0016769~transferase activity, transferring nitrogenous groups,	IPR006222:Glycine cleavage T-protein, N-terminal,IPR006223:Glycine cleavage system T protein,IPR013977:Glycine cleavage T-protein, C-terminal barrel,IPR027266:GTP-binding protein TrmE/Glycine cleavage system T protein, domain 1,	mmu00260:Glycine, serine and threonine metabolism,mmu00630:Glyoxylate and dicarboxylate metabolism,mmu00670:One carbon pool by folate,mmu01100:Metabolic pathways,mmu01130:Biosynthesis of antibiotics,mmu01200:Carbon metabolism,	PF01571:Aminomethyltransferase folate-binding domain,PF08669:Glycine cleavage T-protein C-terminal barrel domain,	R-MMU-6783984:R-MMU-6783984,	Brain,	Aminotransferase,Complete proteome,Methyltransferase,Mitochondrion,Reference proteome,Transferase,Transit peptide,	chain:Aminomethyltransferase, mitochondrial,transit peptide:Mitochondrion,	0	0	0	0	2.1.2.10,	100043456:predicted gene 10681(Gm10681),15495:hydroxy-delta-5-steroid dehydrogenase, 3 beta- and steroid delta-isomerase 4(Hsd3b4),22627:tyrosine 3-monooxygenase/tryptophan 5-monooxygenase activation protein, epsilon polypeptide(Ywhae),	0	NA	NA	Neuron-central	Astrocyte-central
ATP1A1	ATPase, Na+/K+ transporting, alpha 1 polypeptide(Atp1a1)	ENSMUSG00000033161	11928	NA	NA	1.31408	NA	NA	GO:0002026~regulation of the force of heart contraction,GO:0002028~regulation of sodium ion transport,GO:0003008~system process,GO:0003012~muscle system process,GO:0003013~circulatory system process,GO:0003015~heart process,GO:0006629~lipid metabolic process,GO:0006694~steroid biosynthetic process,GO:0006704~glucocorticoid biosynthetic process,GO:0006810~transport,GO:0006811~ion transport,GO:0006…	GO:0005576~extracellular region,GO:0005622~intracellular,GO:0005623~cell,GO:0005737~cytoplasm,GO:0005768~endosome,GO:0005773~vacuole,GO:0005783~endoplasmic reticulum,GO:0005794~Golgi apparatus,GO:0005886~plasma membrane,GO:0005887~integral component of plasma membrane,GO:0005890~sodium:potassium-exchanging ATPase complex,GO:0005901~caveola,GO:0005911~cell-cell junction,GO:0012505~endomembrane sys…	GO:0000166~nucleotide binding,GO:0001882~nucleoside binding,GO:0001883~purine nucleoside binding,GO:0003824~catalytic activity,GO:0005215~transporter activity,GO:0005391~sodium:potassium-exchanging ATPase activity,GO:0005488~binding,GO:0005496~steroid binding,GO:0005515~protein binding,GO:0005524~ATP binding,GO:0008092~cytoskeletal protein binding,GO:0008289~lipid binding,GO:0008324~cation transm…	IPR001757:Cation-transporting P-type ATPase,IPR004014:Cation-transporting P-type ATPase, N-terminal,IPR005775:Sodium/potassium-transporting P-type ATPase, subfamily IIC,IPR006068:Cation-transporting P-type ATPase, C-terminal,IPR008250:P-type ATPase, A domain,IPR018303:P-type ATPase, phosphorylation site,IPR023214:HAD-like domain,IPR023298:P-type ATPase, transmembrane domain,IPR023299:P-type ATPas…	mmu04022:cGMP-PKG signaling pathway,mmu04024:cAMP signaling pathway,mmu04260:Cardiac muscle contraction,mmu04261:Adrenergic signaling in cardiomyocytes,mmu04911:Insulin secretion,mmu04918:Thyroid hormone synthesis,mmu04919:Thyroid hormone signaling pathway,mmu04960:Aldosterone-regulated sodium reabsorption,mmu04961:Endocrine and other factor-regulated calcium reabsorption,mmu04964:Proximal tubule…	PF00122:E1-E2 ATPase,PF00689:Cation transporting ATPase, C-terminus,PF00690:Cation transporter/ATPase, N-terminus,	R-MMU-5578775:R-MMU-5578775,R-MMU-936837:R-MMU-936837,	Bone marrow,Brain,Brain cortex,Hippocampus,Liver,Mammary gland,Mammary tumor. C3,Mammary tumor. MMTV-LTR/INT3 model. 5 month old mouse. Taken by biopsy.,Sympathetic ganglion,	Acetylation,ATP-binding,Cell membrane,Complete proteome,Direct protein sequencing,Hydrolase,Ion transport,Magnesium,Membrane,Metal-binding,Nucleotide-binding,Phosphoprotein,Potassium,Potassium transport,Reference proteome,Sodium,Sodium transport,Sodium/potassium transport,Transmembrane,Transmembrane helix,Transport,	active site:4-aspartylphosphate intermediate,chain:Sodium/potassium-transporting ATPase subunit alpha-1,metal ion-binding site:Magnesium,modified residue,region of interest:Phosphoinositide-3 kinase binding,topological domain:Cytoplasmic,topological domain:Lumenal,transmembrane region,		12289:Atp1a1~ATPase, Na+/K+ transporting, alpha 1 polypeptide,13385:Atp1a1~ATPase, Na+/K+ transporting, alpha 1 polypeptide,13626:Atp1a1~ATPase, Na+/K+ transporting, alpha 1 polypeptide,16531:Atp1a1~ATPase, Na+/K+ transporting, alpha 1 polypeptide,18999:Atp1a1~ATPase, Na+/K+ transporting, alpha 1 polypeptide,19122:Atp1a1~ATPase, Na+/K+ transporting, alpha 1 polypeptide,20541:Atp1a1~ATPase, Na+/K+…		16438:inositol 1,4,5-trisphosphate receptor 1(Itpr1),20541:solute carrier family 8 (sodium/calcium exchanger), member 1(Slc8a1),	3.6.3.-,3.6.3.9,	100043456:predicted gene 10681(Gm10681),11459:actin, alpha 1, skeletal muscle(Acta1),11931:ATPase, Na+/K+ transporting, beta 1 polypeptide(Atp1b1),14056:enhancer of zeste 2 polycomb repressive complex 2 subunit(Ezh2),14800:glutamate receptor, ionotropic, AMPA2 (alpha 2)(Gria2),14810:glutamate receptor, ionotropic, NMDA1 (zeta 1)(Grin1),14812:glutamate receptor, ionotropic, NMDA2B (epsilon 2)(Grin…	100042025:glyceraldehyde-3-phosphate dehydrogenase, pseudogene 15(Gapdh-ps15),103733:tubulin, gamma 1(Tubg1),107975:phosphofurin acidic cluster sorting protein 1(Pacs1),109674:adenosine monophosphate deaminase 2(Ampd2),11771:adaptor-related protein complex 2, alpha 1 subunit(Ap2a1),11906:zinc finger homeobox 3(Zfhx3),11944:ATPase, H+/K+ exchanging, gastric, alpha polypeptide(Atp4a),11972:ATPase, …	Neuron-optimal	NA	NA	NA
atp1a2	ATPase, Na+/K+ transporting, alpha 2 polypeptide(Atp1a2)	ENSMUSG00000007097	98660	NA	NA	NA	NA	0.00799909	GO:0001504~neurotransmitter uptake,GO:0001505~regulation of neurotransmitter levels,GO:0002026~regulation of the force of heart contraction,GO:0002028~regulation of sodium ion transport,GO:0002087~regulation of respiratory gaseous exchange by neurological system process,GO:0003008~system process,GO:0003012~muscle system process,GO:0003013~circulatory system process,GO:0003015~heart process,GO:000…	GO:0005576~extracellular region,GO:0005622~intracellular,GO:0005623~cell,GO:0005737~cytoplasm,GO:0005768~endosome,GO:0005773~vacuole,GO:0005886~plasma membrane,GO:0005887~integral component of plasma membrane,GO:0005890~sodium:potassium-exchanging ATPase complex,GO:0005901~caveola,GO:0005911~cell-cell junction,GO:0012505~endomembrane system,GO:0014704~intercalated disc,GO:0016020~membrane,GO:0016…	GO:0000166~nucleotide binding,GO:0001882~nucleoside binding,GO:0001883~purine nucleoside binding,GO:0003824~catalytic activity,GO:0005215~transporter activity,GO:0005391~sodium:potassium-exchanging ATPase activity,GO:0005488~binding,GO:0005496~steroid binding,GO:0005515~protein binding,GO:0005524~ATP binding,GO:0008144~drug binding,GO:0008289~lipid binding,GO:0008324~cation transmembrane transpor…	IPR001757:Cation-transporting P-type ATPase,IPR004014:Cation-transporting P-type ATPase, N-terminal,IPR005775:Sodium/potassium-transporting P-type ATPase, subfamily IIC,IPR006068:Cation-transporting P-type ATPase, C-terminal,IPR008250:P-type ATPase, A domain,IPR018303:P-type ATPase, phosphorylation site,IPR023214:HAD-like domain,IPR023298:P-type ATPase, transmembrane domain,IPR023299:P-type ATPas…	mmu04022:cGMP-PKG signaling pathway,mmu04024:cAMP signaling pathway,mmu04260:Cardiac muscle contraction,mmu04261:Adrenergic signaling in cardiomyocytes,mmu04911:Insulin secretion,mmu04918:Thyroid hormone synthesis,mmu04919:Thyroid hormone signaling pathway,mmu04960:Aldosterone-regulated sodium reabsorption,mmu04961:Endocrine and other factor-regulated calcium reabsorption,mmu04964:Proximal tubule…	PF00122:E1-E2 ATPase,PF00689:Cation transporting ATPase, C-terminus,PF00690:Cation transporter/ATPase, N-terminus,	R-MMU-5578775:R-MMU-5578775,R-MMU-936837:R-MMU-936837,	Bone,Brain,Brain cortex,Embryonic tail,Heart,Hippocampus,Mammary tumor,Mammary tumor metastatized to lung. Tumor arose spontaneously,Medulla oblongata,	ATP-binding,Cell membrane,Coiled coil,Complete proteome,Direct protein sequencing,Hydrolase,Ion transport,Magnesium,Membrane,Metal-binding,Nucleotide-binding,Phosphoprotein,Potassium,Potassium transport,Proteomics identification,Reference proteome,Sodium,Sodium transport,Sodium/potassium transport,Transmembrane,Transmembrane helix,Transport,	active site:4-aspartylphosphate intermediate,chain:Sodium/potassium-transporting ATPase subunit alpha-2,metal ion-binding site:Magnesium,modified residue,region of interest:Interaction with phosphoinositide-3 kinase,topological domain:Cytoplasmic,topological domain:Lumenal,transmembrane region,	0	16531:Atp1a2~ATPase, Na+/K+ transporting, alpha 2 polypeptide,20541:Atp1a2~ATPase, Na+/K+ transporting, alpha 2 polypeptide,20541:Slc8a1~solute carrier family 8 (sodium/calcium exchanger), member 1,22318:Atp1a2~ATPase, Na+/K+ transporting, alpha 2 polypeptide,	0	16438:inositol 1,4,5-trisphosphate receptor 1(Itpr1),20541:solute carrier family 8 (sodium/calcium exchanger), member 1(Slc8a1),	3.6.3.-,3.6.3.9,	16531:potassium large conductance calcium-activated channel, subfamily M, alpha member 1(Kcnma1),22318:vesicle-associated membrane protein 2(Vamp2),	103733:tubulin, gamma 1(Tubg1),109674:adenosine monophosphate deaminase 2(Ampd2),11928:ATPase, Na+/K+ transporting, alpha 1 polypeptide(Atp1a1),11944:ATPase, H+/K+ exchanging, gastric, alpha polypeptide(Atp4a),11972:ATPase, H+ transporting, lysosomal V0 subunit D1(Atp6v0d1),13429:dynamin 1(Dnm1),13627:eukaryotic translation elongation factor 1 alpha 1(Eef1a1),14681:guanine nucleotide binding prot…	Neuron-optimal	NA	NA	NA
ATP1A3	ATPase, Na+/K+ transporting, alpha 3 polypeptide(Atp1a3)	ENSMUSG00000040907	232975	0.584927	NA	0.259127	NA	-0.0479628	GO:0003008~system process,GO:0003012~muscle system process,GO:0003013~circulatory system process,GO:0003015~heart process,GO:0006810~transport,GO:0006811~ion transport,GO:0006812~cation transport,GO:0006813~potassium ion transport,GO:0006814~sodium ion transport,GO:0006818~hydrogen transport,GO:0006873~cellular ion homeostasis,GO:0006875~cellular metal ion homeostasis,GO:0006883~cellular sodium i…	GO:0005576~extracellular region,GO:0005622~intracellular,GO:0005623~cell,GO:0005634~nucleus,GO:0005737~cytoplasm,GO:0005783~endoplasmic reticulum,GO:0005794~Golgi apparatus,GO:0005886~plasma membrane,GO:0005887~integral component of plasma membrane,GO:0005890~sodium:potassium-exchanging ATPase complex,GO:0012505~endomembrane system,GO:0016020~membrane,GO:0016021~integral component of membrane,GO:…	GO:0000166~nucleotide binding,GO:0001664~G-protein coupled receptor binding,GO:0001882~nucleoside binding,GO:0001883~purine nucleoside binding,GO:0001948~glycoprotein binding,GO:0003824~catalytic activity,GO:0005102~receptor binding,GO:0005215~transporter activity,GO:0005391~sodium:potassium-exchanging ATPase activity,GO:0005488~binding,GO:0005515~protein binding,GO:0005524~ATP binding,GO:0008324…	IPR001757:Cation-transporting P-type ATPase,IPR004014:Cation-transporting P-type ATPase, N-terminal,IPR005775:Sodium/potassium-transporting P-type ATPase, subfamily IIC,IPR006068:Cation-transporting P-type ATPase, C-terminal,IPR008250:P-type ATPase, A domain,IPR018303:P-type ATPase, phosphorylation site,IPR023214:HAD-like domain,IPR023298:P-type ATPase, transmembrane domain,IPR023299:P-type ATPas…	mmu04022:cGMP-PKG signaling pathway,mmu04024:cAMP signaling pathway,mmu04260:Cardiac muscle contraction,mmu04261:Adrenergic signaling in cardiomyocytes,mmu04911:Insulin secretion,mmu04918:Thyroid hormone synthesis,mmu04919:Thyroid hormone signaling pathway,mmu04960:Aldosterone-regulated sodium reabsorption,mmu04961:Endocrine and other factor-regulated calcium reabsorption,mmu04964:Proximal tubule…	PF00122:E1-E2 ATPase,PF00689:Cation transporting ATPase, C-terminus,PF00690:Cation transporter/ATPase, N-terminus,	R-MMU-5578775:R-MMU-5578775,R-MMU-936837:R-MMU-936837,	Brain,Colon,Eye,Liver,	ATP-binding,Cell membrane,Complete proteome,Direct protein sequencing,Hydrolase,Ion transport,Magnesium,Membrane,Metal-binding,Nucleotide-binding,Phosphoprotein,Potassium,Potassium transport,Proteomics identification,Reference proteome,Sodium,Sodium transport,Sodium/potassium transport,Transmembrane,Transmembrane helix,Transport,	active site:4-aspartylphosphate intermediate,chain:Sodium/potassium-transporting ATPase subunit alpha-3,metal ion-binding site:Magnesium,modified residue,region of interest:Interaction with phosphoinositide-3 kinase,topological domain:Cytoplasmic,topological domain:Lumenal,transmembrane region,		143458:Atp1a3~ATPase, Na+/K+ transporting, alpha 3 polypeptide,16531:Atp1a3~ATPase, Na+/K+ transporting, alpha 3 polypeptide,19122:Atp1a3~ATPase, Na+/K+ transporting, alpha 3 polypeptide,208117:Atp1a3~ATPase, Na+/K+ transporting, alpha 3 polypeptide,22318:Atp1a3~ATPase, Na+/K+ transporting, alpha 3 polypeptide,226548:Atp1a3~ATPase, Na+/K+ transporting, alpha 3 polypeptide,			3.6.3.-,3.6.3.9,	100043456:predicted gene 10681(Gm10681),14810:glutamate receptor, ionotropic, NMDA1 (zeta 1)(Grin1),14812:glutamate receptor, ionotropic, NMDA2B (epsilon 2)(Grin2b),15495:hydroxy-delta-5-steroid dehydrogenase, 3 beta- and steroid delta-isomerase 4(Hsd3b4),16531:potassium large conductance calcium-activated channel, subfamily M, alpha member 1(Kcnma1),19339:RAB3A, member RAS oncogene family(Rab3a)…	103733:tubulin, gamma 1(Tubg1),109674:adenosine monophosphate deaminase 2(Ampd2),11928:ATPase, Na+/K+ transporting, alpha 1 polypeptide(Atp1a1),11944:ATPase, H+/K+ exchanging, gastric, alpha polypeptide(Atp4a),11972:ATPase, H+ transporting, lysosomal V0 subunit D1(Atp6v0d1),13429:dynamin 1(Dnm1),13627:eukaryotic translation elongation factor 1 alpha 1(Eef1a1),14681:guanine nucleotide binding prot…	Neuron-optimal	NA	NA	NA
ATP1B1	ATPase, Na+/K+ transporting, beta 1 polypeptide(Atp1b1)	ENSMUSG00000026576	11931	NA	NA	0.720033	-0.0214683	-0.0835888	GO:0000422~mitophagy,GO:0000423~macromitophagy,GO:0001666~response to hypoxia,GO:0001701~in utero embryonic development,GO:0001824~blastocyst development,GO:0002028~regulation of sodium ion transport,GO:0002230~positive regulation of defense response to virus by host,GO:0002252~immune effector process,GO:0002376~immune system process,GO:0002682~regulation of immune system process,GO:0002697~regul…	GO:0005576~extracellular region,GO:0005622~intracellular,GO:0005623~cell,GO:0005886~plasma membrane,GO:0005887~integral component of plasma membrane,GO:0005890~sodium:potassium-exchanging ATPase complex,GO:0005901~caveola,GO:0005911~cell-cell junction,GO:0014704~intercalated disc,GO:0016020~membrane,GO:0016021~integral component of membrane,GO:0016323~basolateral plasma membrane,GO:0016324~apical…	GO:0000166~nucleotide binding,GO:0001671~ATPase activator activity,GO:0001882~nucleoside binding,GO:0001883~purine nucleoside binding,GO:0003823~antigen binding,GO:0003824~catalytic activity,GO:0005215~transporter activity,GO:0005391~sodium:potassium-exchanging ATPase activity,GO:0005488~binding,GO:0005515~protein binding,GO:0005524~ATP binding,GO:0008022~protein C-terminus binding,GO:0008047~enz…	IPR000402:Sodium/potassium-transporting ATPase subunit beta,IPR015565:Sodium/potassium-transporting ATPase subunit beta, chordates,	mmu04022:cGMP-PKG signaling pathway,mmu04024:cAMP signaling pathway,mmu04260:Cardiac muscle contraction,mmu04261:Adrenergic signaling in cardiomyocytes,mmu04911:Insulin secretion,mmu04918:Thyroid hormone synthesis,mmu04919:Thyroid hormone signaling pathway,mmu04960:Aldosterone-regulated sodium reabsorption,mmu04961:Endocrine and other factor-regulated calcium reabsorption,mmu04964:Proximal tubule…	PF00287:Sodium / potassium ATPase beta chain,	R-MMU-210991:R-MMU-210991,R-MMU-5578775:R-MMU-5578775,R-MMU-936837:R-MMU-936837,	Brain,Cerebellum,Head,Kidney,Mammary gland,Medulla oblongata,Spinal cord,	Cell adhesion,Cell membrane,Complete proteome,Direct protein sequencing,Disulfide bond,Glycoprotein,Ion transport,Membrane,Phosphoprotein,Potassium,Potassium transport,Proteomics identification,Reference proteome,Signal-anchor,Sodium,Sodium transport,Sodium/potassium transport,Transmembrane,Transmembrane helix,Transport,	chain:Sodium/potassium-transporting ATPase subunit beta-1,disulfide bond,glycosylation site:N-linked (GlcNAc...),modified residue,topological domain:Cytoplasmic,topological domain:Extracellular,transmembrane region,	0	19122:Atp1b1~ATPase, Na+/K+ transporting, beta 1 polypeptide,208117:Atp1b1~ATPase, Na+/K+ transporting, beta 1 polypeptide,226548:Atp1b1~ATPase, Na+/K+ transporting, beta 1 polypeptide,	0	0	0	100043456:predicted gene 10681(Gm10681),11928:ATPase, Na+/K+ transporting, alpha 1 polypeptide(Atp1a1),13385:discs, large homolog 4 (Drosophila)(Dlg4),15495:hydroxy-delta-5-steroid dehydrogenase, 3 beta- and steroid delta-isomerase 4(Hsd3b4),16790:alanyl (membrane) aminopeptidase(Anpep),22627:tyrosine 3-monooxygenase/tryptophan 5-monooxygenase activation protein, epsilon polypeptide(Ywhae),22631:…	0	Neuron-optimal	NA	NA	NA
Atp1b2	ATPase, Na+/K+ transporting, beta 2 polypeptide(Atp1b2)	ENSMUSG00000041329	11932	NA	NA	0.173441	-0.0176582	-0.0239269	GO:0002028~regulation of sodium ion transport,GO:0006810~transport,GO:0006811~ion transport,GO:0006812~cation transport,GO:0006813~potassium ion transport,GO:0006814~sodium ion transport,GO:0006873~cellular ion homeostasis,GO:0006875~cellular metal ion homeostasis,GO:0006883~cellular sodium ion homeostasis,GO:0007155~cell adhesion,GO:0009987~cellular process,GO:0010107~potassium ion import,GO:001…	GO:0005622~intracellular,GO:0005623~cell,GO:0005737~cytoplasm,GO:0005886~plasma membrane,GO:0005887~integral component of plasma membrane,GO:0005890~sodium:potassium-exchanging ATPase complex,GO:0016020~membrane,GO:0016021~integral component of membrane,GO:0016324~apical plasma membrane,GO:0031224~intrinsic component of membrane,GO:0031226~intrinsic component of plasma membrane,GO:0032991~macromo…	GO:0001671~ATPase activator activity,GO:0003824~catalytic activity,GO:0005215~transporter activity,GO:0005391~sodium:potassium-exchanging ATPase activity,GO:0005488~binding,GO:0005515~protein binding,GO:0008047~enzyme activator activity,GO:0008324~cation transmembrane transporter activity,GO:0008556~potassium-transporting ATPase activity,GO:0015075~ion transmembrane transporter activity,GO:001507…	IPR000402:Sodium/potassium-transporting ATPase subunit beta,	mmu04022:cGMP-PKG signaling pathway,mmu04024:cAMP signaling pathway,mmu04260:Cardiac muscle contraction,mmu04261:Adrenergic signaling in cardiomyocytes,mmu04911:Insulin secretion,mmu04918:Thyroid hormone synthesis,mmu04919:Thyroid hormone signaling pathway,mmu04960:Aldosterone-regulated sodium reabsorption,mmu04961:Endocrine and other factor-regulated calcium reabsorption,mmu04964:Proximal tubule…	PF00287:Sodium / potassium ATPase beta chain,	R-MMU-210991:R-MMU-210991,R-MMU-5578775:R-MMU-5578775,R-MMU-936837:R-MMU-936837,	Brain,Retina,Whole body,	Cell adhesion,Cell membrane,Complete proteome,Direct protein sequencing,Disulfide bond,Glycoprotein,Ion transport,Membrane,Potassium,Potassium transport,Proteomics identification,Reference proteome,Signal-anchor,Sodium,Sodium transport,Sodium/potassium transport,Transmembrane,Transmembrane helix,Transport,	chain:Sodium/potassium-transporting ATPase subunit beta-2,disulfide bond,glycosylation site:N-linked (GlcNAc...),topological domain:Cytoplasmic,topological domain:Extracellular,transmembrane region,						13385:discs, large homolog 4 (Drosophila)(Dlg4),22627:tyrosine 3-monooxygenase/tryptophan 5-monooxygenase activation protein, epsilon polypeptide(Ywhae),		Neuron-optimal	NA	NA	NA
atp1b3	ATPase, Na+/K+ transporting, beta 3 polypeptide(Atp1b3)	ENSMUSG00000032412	11933	NA	NA	NA	-0.0123479	-0.0240474	GO:0002028~regulation of sodium ion transport,GO:0006810~transport,GO:0006811~ion transport,GO:0006812~cation transport,GO:0006813~potassium ion transport,GO:0006814~sodium ion transport,GO:0006873~cellular ion homeostasis,GO:0006875~cellular metal ion homeostasis,GO:0006883~cellular sodium ion homeostasis,GO:0007009~plasma membrane organization,GO:0008104~protein localization,GO:0009987~cellular…	GO:0005576~extracellular region,GO:0005622~intracellular,GO:0005623~cell,GO:0005737~cytoplasm,GO:0005886~plasma membrane,GO:0005887~integral component of plasma membrane,GO:0005890~sodium:potassium-exchanging ATPase complex,GO:0005901~caveola,GO:0016020~membrane,GO:0016021~integral component of membrane,GO:0016023~cytoplasmic, membrane-bounded vesicle,GO:0031224~intrinsic component of membrane,GO…	GO:0001671~ATPase activator activity,GO:0003824~catalytic activity,GO:0005215~transporter activity,GO:0005391~sodium:potassium-exchanging ATPase activity,GO:0005488~binding,GO:0005515~protein binding,GO:0008047~enzyme activator activity,GO:0008324~cation transmembrane transporter activity,GO:0008556~potassium-transporting ATPase activity,GO:0015075~ion transmembrane transporter activity,GO:001507…	IPR000402:Sodium/potassium-transporting ATPase subunit beta,	mmu04022:cGMP-PKG signaling pathway,mmu04024:cAMP signaling pathway,mmu04260:Cardiac muscle contraction,mmu04261:Adrenergic signaling in cardiomyocytes,mmu04911:Insulin secretion,mmu04918:Thyroid hormone synthesis,mmu04919:Thyroid hormone signaling pathway,mmu04960:Aldosterone-regulated sodium reabsorption,mmu04961:Endocrine and other factor-regulated calcium reabsorption,mmu04964:Proximal tubule…	PF00287:Sodium / potassium ATPase beta chain,	R-MMU-210991:R-MMU-210991,R-MMU-5578775:R-MMU-5578775,R-MMU-936837:R-MMU-936837,	Bone marrow,Brain,Eye,Olfactory brain,Pancreas,PCR rescued clones,Retina,	Cell membrane,Complete proteome,Direct protein sequencing,Disulfide bond,Glycoprotein,Ion transport,Membrane,Potassium,Potassium transport,Reference proteome,Signal-anchor,Sodium,Sodium transport,Sodium/potassium transport,Transmembrane,Transmembrane helix,Transport,	chain:Sodium/potassium-transporting ATPase subunit beta-3,disulfide bond,glycosylation site:N-linked (GlcNAc...),topological domain:Cytoplasmic,topological domain:Extracellular,transmembrane region,	0	0	0	0	0	0	0	Neuron-optimal	NA	NA	NA
AZIN2	antizyme inhibitor 2(Azin2)	ENSMUSG00000028789	242669	NA	NA	-0.607817	NA	NA	GO:0006082~organic acid metabolic process,GO:0006520~cellular amino acid metabolic process,GO:0006576~cellular biogenic amine metabolic process,GO:0006591~ornithine metabolic process,GO:0006595~polyamine metabolic process,GO:0006596~polyamine biosynthetic process,GO:0006807~nitrogen compound metabolic process,GO:0006810~transport,GO:0008152~metabolic process,GO:0009056~catabolic process,GO:000905…	GO:0005622~intracellular,GO:0005623~cell,GO:0005634~nucleus,GO:0005737~cytoplasm,GO:0005739~mitochondrion,GO:0005793~endoplasmic reticulum-Golgi intermediate compartment,GO:0005794~Golgi apparatus,GO:0005801~cis-Golgi network,GO:0005802~trans-Golgi network,GO:0012505~endomembrane system,GO:0016020~membrane,GO:0016023~cytoplasmic, membrane-bounded vesicle,GO:0030133~transport vesicle,GO:0030424~ax…	GO:0003824~catalytic activity,GO:0004586~ornithine decarboxylase activity,GO:0005215~transporter activity,GO:0005488~binding,GO:0005515~protein binding,GO:0008047~enzyme activator activity,GO:0008792~arginine decarboxylase activity,GO:0015203~polyamine transmembrane transporter activity,GO:0015489~putrescine transmembrane transporter activity,GO:0016829~lyase activity,GO:0016830~carbon-carbon lya…	IPR000183:Ornithine/DAP/Arg decarboxylase,IPR002433:Ornithine decarboxylase,IPR009006:Alanine racemase/group IV decarboxylase, C-terminal,IPR022643:Orn/DAP/Arg decarboxylase 2, C-terminal,IPR022644:Orn/DAP/Arg decarboxylase 2, N-terminal,IPR022657:Orn/DAP/Arg decarboxylase 2, conserved site,	mmu00330:Arginine and proline metabolism,mmu01100:Metabolic pathways,	PF00278:Pyridoxal-dependent decarboxylase, C-terminal sheet domain,PF02784:Pyridoxal-dependent decarboxylase, pyridoxal binding domain,	R-MMU-351143:R-MMU-351143,	Brain,Lung,Testis,	Cell projection,Complete proteome,Cytoplasm,Cytoplasmic vesicle,Golgi apparatus,Membrane,Nucleus,Polyamine biosynthesis,Proteomics identification,Reference proteome,Transport,Ubl conjugation,	chain:Antizyme inhibitor 2,sequence conflict,	0	0	0	0	0	18245:ornithine decarboxylase antizyme 1(Oaz1),18247:ornithine decarboxylase antizyme 2(Oaz2),53814:ornithine decarboxylase antizyme 3(Oaz3),	0	NA	NA	Neuron-central	Astrocyte-central
bdh1	3-hydroxybutyrate dehydrogenase, type 1(Bdh1)	ENSMUSG00000046598	71911	NA	NA	NA	0.00863719	-0.0116702	GO:0008152~metabolic process,GO:0044699~single-organism process,GO:0044710~single-organism metabolic process,GO:0055114~oxidation-reduction process,	GO:0005622~intracellular,GO:0005623~cell,GO:0005634~nucleus,GO:0005654~nucleoplasm,GO:0005737~cytoplasm,GO:0005739~mitochondrion,GO:0005740~mitochondrial envelope,GO:0005743~mitochondrial inner membrane,GO:0005759~mitochondrial matrix,GO:0016020~membrane,GO:0019866~organelle inner membrane,GO:0031090~organelle membrane,GO:0031966~mitochondrial membrane,GO:0031967~organelle envelope,GO:0031974~mem…	GO:0003824~catalytic activity,GO:0003858~3-hydroxybutyrate dehydrogenase activity,GO:0005488~binding,GO:0005543~phospholipid binding,GO:0008289~lipid binding,GO:0016491~oxidoreductase activity,GO:0016614~oxidoreductase activity, acting on CH-OH group of donors,GO:0016616~oxidoreductase activity, acting on the CH-OH group of donors, NAD or NADP as acceptor,	IPR002347:Glucose/ribitol dehydrogenase,IPR016040:NAD(P)-binding domain,IPR020904:Short-chain dehydrogenase/reductase, conserved site,	mmu00072:Synthesis and degradation of ketone bodies,mmu00650:Butanoate metabolism,mmu01100:Metabolic pathways,	PF00106:short chain dehydrogenase,	R-MMU-77108:R-MMU-77108,R-MMU-77111:R-MMU-77111,	Brain,Kidney,Liver,Testis,Thymus,	Acetylation,Allosteric enzyme,Complete proteome,Direct protein sequencing,Glycoprotein,Membrane,Mitochondrion,Mitochondrion inner membrane,NAD,Oxidoreductase,Phosphoprotein,Proteomics identification,Reference proteome,Transit peptide,	active site:Proton acceptor,binding site:Substrate,chain:D-beta-hydroxybutyrate dehydrogenase, mitochondrial,modified residue,nucleotide phosphate-binding region:NAD,sequence conflict,transit peptide:Mitochondrion,	0	0	0	0	1.1.1.30,	100043456:predicted gene 10681(Gm10681),11964:ATPase, H+ transporting, lysosomal V1 subunit A(Atp6v1a),14804:glutamate receptor, ionotropic, delta 2(Grid2),15495:hydroxy-delta-5-steroid dehydrogenase, 3 beta- and steroid delta-isomerase 4(Hsd3b4),22627:tyrosine 3-monooxygenase/tryptophan 5-monooxygenase activation protein, epsilon polypeptide(Ywhae),54401:tyrosine 3-monooxygenase/tryptophan 5-mon…	0	NA	NA	Neuron-central	Astrocyte-central
cds2	CDP-diacylglycerol synthase (phosphatidate cytidylyltransferase) 2(Cds2)	ENSMUSG00000058793	110911	NA	NA	NA	NA	-0.00883803	GO:0005975~carbohydrate metabolic process,GO:0006629~lipid metabolic process,GO:0006644~phospholipid metabolic process,GO:0006650~glycerophospholipid metabolic process,GO:0006655~phosphatidylglycerol biosynthetic process,GO:0006793~phosphorus metabolic process,GO:0006796~phosphate-containing compound metabolic process,GO:0007154~cell communication,GO:0007165~signal transduction,GO:0007602~phototr…	GO:0005622~intracellular,GO:0005623~cell,GO:0005737~cytoplasm,GO:0005739~mitochondrion,GO:0005740~mitochondrial envelope,GO:0005743~mitochondrial inner membrane,GO:0005783~endoplasmic reticulum,GO:0005789~endoplasmic reticulum membrane,GO:0012505~endomembrane system,GO:0016020~membrane,GO:0016021~integral component of membrane,GO:0019866~organelle inner membrane,GO:0031090~organelle membrane,GO:0…	GO:0003824~catalytic activity,GO:0004605~phosphatidate cytidylyltransferase activity,GO:0016740~transferase activity,GO:0016772~transferase activity, transferring phosphorus-containing groups,GO:0016779~nucleotidyltransferase activity,GO:0070567~cytidylyltransferase activity,	IPR000374:Phosphatidate cytidylyltransferase,IPR016720:Phosphatidate cytidylyltransferase, eukaryota,	mmu00564:Glycerophospholipid metabolism,mmu01100:Metabolic pathways,mmu04070:Phosphatidylinositol signaling system,	0	R-MMU-1483148:R-MMU-1483148,	Brain cortex,Cerebellum,Embryo,Embryonic stem cell,Liver,Lung,Mammary tumor,Mammary tumor. MMTV-LTR/INT3 model. 5 month old mouse. Taken by biopsy.,	Complete proteome,Lipid biosynthesis,Lipid metabolism,Membrane,Mitochondrion,Mitochondrion inner membrane,Nucleotidyltransferase,Phospholipid biosynthesis,Phospholipid metabolism,Phosphoprotein,Proteomics identification,Reference proteome,Transferase,Transmembrane,Transmembrane helix,	chain:Phosphatidate cytidylyltransferase 2,modified residue,sequence conflict,transmembrane region,	0	0	0	0	2.7.7.41,	22627:tyrosine 3-monooxygenase/tryptophan 5-monooxygenase activation protein, epsilon polypeptide(Ywhae),	0	NA	NA	Neuron-central	Astrocyte-central
COQ3	coenzyme Q3 methyltransferase(Coq3)	ENSMUSG00000028247	230027	NA	NA	-0.543904	NA	NA	GO:0005975~carbohydrate metabolic process,GO:0006066~alcohol metabolic process,GO:0006071~glycerol metabolic process,GO:0006732~coenzyme metabolic process,GO:0006733~oxidoreduction coenzyme metabolic process,GO:0006743~ubiquinone metabolic process,GO:0006744~ubiquinone biosynthetic process,GO:0008152~metabolic process,GO:0009058~biosynthetic process,GO:0009108~coenzyme biosynthetic process,GO:000…	GO:0005622~intracellular,GO:0005623~cell,GO:0005737~cytoplasm,GO:0005739~mitochondrion,GO:0005740~mitochondrial envelope,GO:0005743~mitochondrial inner membrane,GO:0016020~membrane,GO:0019866~organelle inner membrane,GO:0019898~extrinsic component of membrane,GO:0031090~organelle membrane,GO:0031312~extrinsic component of organelle membrane,GO:0031314~extrinsic component of mitochondrial inner me…	GO:0003824~catalytic activity,GO:0004395~hexaprenyldihydroxybenzoate methyltransferase activity,GO:0008168~methyltransferase activity,GO:0008169~C-methyltransferase activity,GO:0008171~O-methyltransferase activity,GO:0008425~2-polyprenyl-6-methoxy-1,4-benzoquinone methyltransferase activity,GO:0008689~3-demethylubiquinone-9 3-O-methyltransferase activity,GO:0008757~S-adenosylmethionine-dependent …	IPR010233:Ubiquinone biosynthesis O-methyltransferase,	mmu00130:Ubiquinone and other terpenoid-quinone biosynthesis,mmu01100:Metabolic pathways,	0	R-MMU-2142789:R-MMU-2142789,	Heart,Kidney,Mammary gland,Skin,Urinary bladder,	Acetylation,Complete proteome,Membrane,Methyltransferase,Mitochondrion,Mitochondrion inner membrane,Reference proteome,S-adenosyl-L-methionine,Transferase,Transit peptide,Ubiquinone biosynthesis,	chain:Hexaprenyldihydroxybenzoate methyltransferase, mitochondrial,sequence conflict,transit peptide:Mitochondrion,	0	0	0	0	2.1.1.114,2.1.1.64,	22627:tyrosine 3-monooxygenase/tryptophan 5-monooxygenase activation protein, epsilon polypeptide(Ywhae),	0	NA	NA	Neuron-central	Astrocyte-central
coq5	coenzyme Q5 methyltransferase(Coq5)	ENSMUSG00000041733	52064	NA	NA	NA	NA	-0.0156295	GO:0006732~coenzyme metabolic process,GO:0006733~oxidoreduction coenzyme metabolic process,GO:0006743~ubiquinone metabolic process,GO:0006744~ubiquinone biosynthetic process,GO:0008152~metabolic process,GO:0009058~biosynthetic process,GO:0009108~coenzyme biosynthetic process,GO:0009987~cellular process,GO:0032259~methylation,GO:0042180~cellular ketone metabolic process,GO:0042181~ketone biosynthe…	GO:0005622~intracellular,GO:0005623~cell,GO:0005737~cytoplasm,GO:0005739~mitochondrion,GO:0005740~mitochondrial envelope,GO:0005743~mitochondrial inner membrane,GO:0016020~membrane,GO:0019866~organelle inner membrane,GO:0019898~extrinsic component of membrane,GO:0031090~organelle membrane,GO:0031312~extrinsic component of organelle membrane,GO:0031314~extrinsic component of mitochondrial inner me…	GO:0003824~catalytic activity,GO:0008168~methyltransferase activity,GO:0008169~C-methyltransferase activity,GO:0008425~2-polyprenyl-6-methoxy-1,4-benzoquinone methyltransferase activity,GO:0008757~S-adenosylmethionine-dependent methyltransferase activity,GO:0016740~transferase activity,GO:0016741~transferase activity, transferring one-carbon groups,GO:0030580~quinone cofactor methyltransferase ac…	IPR004033:UbiE/COQ5 methyltransferase,IPR023576:UbiE/COQ5 methyltransferase, conserved site,	mmu00130:Ubiquinone and other terpenoid-quinone biosynthesis,mmu01100:Metabolic pathways,	PF01209:ubiE/COQ5 methyltransferase family,	0	Corpora quadrigemina,Head,Liver,Pancreas,	Complete proteome,Membrane,Methyltransferase,Mitochondrion,Mitochondrion inner membrane,Proteomics identification,Reference proteome,S-adenosyl-L-methionine,Transferase,Transit peptide,Ubiquinone biosynthesis,	chain:Ubiquinone biosynthesis methyltransferase COQ5, mitochondrial,sequence conflict,transit peptide:Mitochondrion,	0	0	0	0	2.1.1.201,	100043456:predicted gene 10681(Gm10681),15495:hydroxy-delta-5-steroid dehydrogenase, 3 beta- and steroid delta-isomerase 4(Hsd3b4),22627:tyrosine 3-monooxygenase/tryptophan 5-monooxygenase activation protein, epsilon polypeptide(Ywhae),	0	NA	NA	Neuron-central	Astrocyte-central
dguok	deoxyguanosine kinase(Dguok)	ENSMUSG00000014554	27369	NA	NA	NA	NA	-0.0150503	GO:0006139~nucleobase-containing compound metabolic process,GO:0006163~purine nucleotide metabolic process,GO:0006464~cellular protein modification process,GO:0006468~protein phosphorylation,GO:0006725~cellular aromatic compound metabolic process,GO:0006753~nucleoside phosphate metabolic process,GO:0006793~phosphorus metabolic process,GO:0006796~phosphate-containing compound metabolic process,GO:…	GO:0005622~intracellular,GO:0005623~cell,GO:0005634~nucleus,GO:0005737~cytoplasm,GO:0005739~mitochondrion,GO:0005829~cytosol,GO:0043226~organelle,GO:0043227~membrane-bounded organelle,GO:0043229~intracellular organelle,GO:0043231~intracellular membrane-bounded organelle,GO:0044424~intracellular part,GO:0044444~cytoplasmic part,GO:0044464~cell part,	GO:0000166~nucleotide binding,GO:0001882~nucleoside binding,GO:0001883~purine nucleoside binding,GO:0003824~catalytic activity,GO:0004138~deoxyguanosine kinase activity,GO:0005488~binding,GO:0005524~ATP binding,GO:0016301~kinase activity,GO:0016740~transferase activity,GO:0016772~transferase activity, transferring phosphorus-containing groups,GO:0017076~purine nucleotide binding,GO:0019136~deoxyn…	IPR002624:Deoxynucleoside kinase,IPR027417:P-loop containing nucleoside triphosphate hydrolase,	mmu00230:Purine metabolism,mmu01100:Metabolic pathways,	PF01712:Deoxynucleoside kinase,	R-MMU-74217:R-MMU-74217,	Heart,Osteoblast,Spleen,Urinary bladder,	Alternative splicing,ATP-binding,Complete proteome,Cytoplasm,Kinase,Mitochondrion,Nucleotide-binding,Proteomics identification,Reference proteome,Transferase,Transit peptide,	chain:Deoxyguanosine kinase, mitochondrial,modified residue,nucleotide phosphate-binding region:ATP,sequence conflict,splice variant,transit peptide:Mitochondrion,	0	0	Nucleotide transport and metabolism,	0	2.7.1.113,	22627:tyrosine 3-monooxygenase/tryptophan 5-monooxygenase activation protein, epsilon polypeptide(Ywhae),	0	NA	NA	Neuron-central	Astrocyte-central
dlat	dihydrolipoamide S-acetyltransferase (E2 component of pyruvate dehydrogenase complex)(Dlat)	ENSMUSG00000000168	235339	NA	NA	NA	-0.0227391	-0.0113724	GO:0005975~carbohydrate metabolic process,GO:0005996~monosaccharide metabolic process,GO:0006006~glucose metabolic process,GO:0006082~organic acid metabolic process,GO:0006084~acetyl-CoA metabolic process,GO:0006085~acetyl-CoA biosynthetic process,GO:0006086~acetyl-CoA biosynthetic process from pyruvate,GO:0006090~pyruvate metabolic process,GO:0006091~generation of precursor metabolites and energ…	GO:0005622~intracellular,GO:0005623~cell,GO:0005737~cytoplasm,GO:0005739~mitochondrion,GO:0005759~mitochondrial matrix,GO:0005967~mitochondrial pyruvate dehydrogenase complex,GO:0031974~membrane-enclosed lumen,GO:0032991~macromolecular complex,GO:0043209~myelin sheath,GO:0043226~organelle,GO:0043227~membrane-bounded organelle,GO:0043229~intracellular organelle,GO:0043231~intracellular membrane-bo…	GO:0003824~catalytic activity,GO:0004738~pyruvate dehydrogenase activity,GO:0004742~dihydrolipoyllysine-residue acetyltransferase activity,GO:0016407~acetyltransferase activity,GO:0016417~S-acyltransferase activity,GO:0016418~S-acetyltransferase activity,GO:0016491~oxidoreductase activity,GO:0016620~oxidoreductase activity, acting on the aldehyde or oxo group of donors, NAD or NADP as acceptor,GO…	IPR000089:Biotin/lipoyl attachment,IPR001078:2-oxoacid dehydrogenase acyltransferase, catalytic domain,IPR003016:2-oxo acid dehydrogenase, lipoyl-binding site,IPR004167:E3 binding,IPR006257:Dihydrolipoyllysine-residue acetyltransferase component of pyruvate dehydrogenase complex,IPR011053:Single hybrid motif,IPR023213:Chloramphenicol acetyltransferase-like domain,	mmu00010:Glycolysis / Gluconeogenesis,mmu00020:Citrate cycle (TCA cycle),mmu00620:Pyruvate metabolism,mmu01100:Metabolic pathways,mmu01130:Biosynthesis of antibiotics,mmu01200:Carbon metabolism,	PF00198:2-oxoacid dehydrogenases acyltransferase (catalytic domain),PF00364:Biotin-requiring enzyme,PF02817:e3 binding domain,	R-MMU-204174:R-MMU-204174,R-MMU-389661:R-MMU-389661,R-MMU-5362517:R-MMU-5362517,R-MMU-70268:R-MMU-70268,	Hepatoma,Hippocampus,Mammary tumor,Mammary tumor metastatized to lung. Tumor arose spontaneously,Medulla oblongata,	Acetylation,Acyltransferase,Carbohydrate metabolism,Complete proteome,Direct protein sequencing,Glucose metabolism,Lipoyl,Mitochondrion,Phosphoprotein,Reference proteome,Repeat,Transferase,Transit peptide,Tricarboxylic acid cycle,	chain:Dihydrolipoyllysine-residue acetyltransferase component of pyruvate dehydrogenase complex, mitochondrial,domain:Lipoyl-binding 1,domain:Lipoyl-binding 2,modified residue,region of interest:Catalytic,region of interest:CoA-binding,region of interest:E3- and/or E1-component binding domain,sequence conflict,transit peptide:Mitochondrion,	0	15194:Dlat~dihydrolipoamide S-acetyltransferase (E2 component of pyruvate dehydrogenase complex),22631:Dlat~dihydrolipoamide S-acetyltransferase (E2 component of pyruvate dehydrogenase complex),3028:Dlat~dihydrolipoamide S-acetyltransferase (E2 component of pyruvate dehydrogenase complex),	0	0	2.3.1.12,	100043456:predicted gene 10681(Gm10681),14056:enhancer of zeste 2 polycomb repressive complex 2 subunit(Ezh2),14810:glutamate receptor, ionotropic, NMDA1 (zeta 1)(Grin1),15495:hydroxy-delta-5-steroid dehydrogenase, 3 beta- and steroid delta-isomerase 4(Hsd3b4),22627:tyrosine 3-monooxygenase/tryptophan 5-monooxygenase activation protein, epsilon polypeptide(Ywhae),22631:tyrosine 3-monooxygenase/tr…	14810:glutamate receptor, ionotropic, NMDA1 (zeta 1)(Grin1),	Neuron-optimal	NA	NA	NA
dld	dihydrolipoamide dehydrogenase(Dld)	ENSMUSG00000020664	13382	NA	NA	NA	-0.0239992	-0.00718798	GO:0000003~reproduction,GO:0003006~developmental process involved in reproduction,GO:0006082~organic acid metabolic process,GO:0006084~acetyl-CoA metabolic process,GO:0006085~acetyl-CoA biosynthetic process,GO:0006086~acetyl-CoA biosynthetic process from pyruvate,GO:0006090~pyruvate metabolic process,GO:0006091~generation of precursor metabolites and energy,GO:0006103~2-oxoglutarate metabolic pro…	GO:0001669~acrosomal vesicle,GO:0005622~intracellular,GO:0005623~cell,GO:0005634~nucleus,GO:0005654~nucleoplasm,GO:0005737~cytoplasm,GO:0005739~mitochondrion,GO:0005759~mitochondrial matrix,GO:0005773~vacuole,GO:0005929~cilium,GO:0012505~endomembrane system,GO:0016023~cytoplasmic, membrane-bounded vesicle,GO:0030141~secretory granule,GO:0031410~cytoplasmic vesicle,GO:0031974~membrane-enclosed lum…	GO:0000166~nucleotide binding,GO:0003824~catalytic activity,GO:0004148~dihydrolipoyl dehydrogenase activity,GO:0004738~pyruvate dehydrogenase activity,GO:0005488~binding,GO:0016491~oxidoreductase activity,GO:0016620~oxidoreductase activity, acting on the aldehyde or oxo group of donors, NAD or NADP as acceptor,GO:0016651~oxidoreductase activity, acting on NAD(P)H,GO:0016667~oxidoreductase activit…	IPR004099:Pyridine nucleotide-disulphide oxidoreductase, dimerisation,IPR006258:Dihydrolipoamide dehydrogenase,IPR012999:Pyridine nucleotide-disulphide oxidoreductase, class I, active site,IPR016156:FAD/NAD-linked reductase, dimerisation,IPR023753:Pyridine nucleotide-disulphide oxidoreductase, FAD/NAD(P)-binding domain,	mmu00010:Glycolysis / Gluconeogenesis,mmu00020:Citrate cycle (TCA cycle),mmu00260:Glycine, serine and threonine metabolism,mmu00280:Valine, leucine and isoleucine degradation,mmu00620:Pyruvate metabolism,mmu00630:Glyoxylate and dicarboxylate metabolism,mmu01100:Metabolic pathways,mmu01130:Biosynthesis of antibiotics,mmu01200:Carbon metabolism,	PF02852:Pyridine nucleotide-disulphide oxidoreductase, dimerisation domain,PF07992:Pyridine nucleotide-disulphide oxidoreductase,	R-MMU-204174:R-MMU-204174,R-MMU-389661:R-MMU-389661,R-MMU-5362517:R-MMU-5362517,R-MMU-6783984:R-MMU-6783984,R-MMU-70268:R-MMU-70268,R-MMU-70895:R-MMU-70895,R-MMU-71064:R-MMU-71064,R-MMU-71403:R-MMU-71403,	Bone marrow,Brain,Heart,Hippocampus,Liver,Mammary tumor,	Acetylation,Complete proteome,Direct protein sequencing,Disulfide bond,FAD,Flavoprotein,Mitochondrion,NAD,Oxidoreductase,Phosphoprotein,Redox-active center,Reference proteome,Transit peptide,	active site:Proton acceptor,binding site:FAD,binding site:FAD; via amide nitrogen and carbonyl oxygen,binding site:NAD,binding site:NAD; via amide nitrogen,binding site:NAD; via amide nitrogen and carbonyl oxygen,chain:Dihydrolipoyl dehydrogenase, mitochondrial,disulfide bond,modified residue,nucleotide phosphate-binding region:FAD,nucleotide phosphate-binding region:NAD,sequence conflict,transit…	0	15194:Dld~dihydrolipoamide dehydrogenase,16531:Dld~dihydrolipoamide dehydrogenase,170484:Dld~dihydrolipoamide dehydrogenase,3028:Dld~dihydrolipoamide dehydrogenase,	0	0	1.8.1.4,	100043456:predicted gene 10681(Gm10681),13385:discs, large homolog 4 (Drosophila)(Dlg4),14056:enhancer of zeste 2 polycomb repressive complex 2 subunit(Ezh2),15495:hydroxy-delta-5-steroid dehydrogenase, 3 beta- and steroid delta-isomerase 4(Hsd3b4),16531:potassium large conductance calcium-activated channel, subfamily M, alpha member 1(Kcnma1),224742:ATP-binding cassette, sub-family F (GCN20), me…	0	Neuron-optimal	NA	Neuron-central	Astrocyte-central
dlst	dihydrolipoamide S-succinyltransferase (E2 component of 2-oxo-glutarate complex)(Dlst)	ENSMUSG00000004789	78920	NA	NA	NA	NA	-0.0264437	GO:0006082~organic acid metabolic process,GO:0006084~acetyl-CoA metabolic process,GO:0006091~generation of precursor metabolites and energy,GO:0006099~tricarboxylic acid cycle,GO:0006103~2-oxoglutarate metabolic process,GO:0006139~nucleobase-containing compound metabolic process,GO:0006520~cellular amino acid metabolic process,GO:0006553~lysine metabolic process,GO:0006554~lysine catabolic proces…	GO:0005576~extracellular region,GO:0005622~intracellular,GO:0005623~cell,GO:0005634~nucleus,GO:0005737~cytoplasm,GO:0005739~mitochondrion,GO:0005886~plasma membrane,GO:0016020~membrane,GO:0031982~vesicle,GO:0031988~membrane-bounded vesicle,GO:0032991~macromolecular complex,GO:0043209~myelin sheath,GO:0043226~organelle,GO:0043227~membrane-bounded organelle,GO:0043229~intracellular organelle,GO:004…	GO:0003824~catalytic activity,GO:0004149~dihydrolipoyllysine-residue succinyltransferase activity,GO:0005488~binding,GO:0005515~protein binding,GO:0016417~S-acyltransferase activity,GO:0016740~transferase activity,GO:0016746~transferase activity, transferring acyl groups,GO:0016747~transferase activity, transferring acyl groups other than amino-acyl groups,GO:0016748~succinyltransferase activity,…	IPR000089:Biotin/lipoyl attachment,IPR001078:2-oxoacid dehydrogenase acyltransferase, catalytic domain,IPR003016:2-oxo acid dehydrogenase, lipoyl-binding site,IPR006255:Dihydrolipoamide succinyltransferase,IPR011053:Single hybrid motif,IPR023213:Chloramphenicol acetyltransferase-like domain,	mmu00020:Citrate cycle (TCA cycle),mmu00310:Lysine degradation,mmu01100:Metabolic pathways,mmu01130:Biosynthesis of antibiotics,mmu01200:Carbon metabolism,	PF00198:2-oxoacid dehydrogenases acyltransferase (catalytic domain),PF00364:Biotin-requiring enzyme,	R-MMU-389661:R-MMU-389661,R-MMU-71064:R-MMU-71064,R-MMU-71403:R-MMU-71403,	Bone marrow,Cerebellum,Heart,Hippocampus,Mammary tumor,Oviduct,Skin,Testis,Visual cortex,	Acetylation,Acyltransferase,Alternative splicing,Complete proteome,Direct protein sequencing,Lipoyl,Mitochondrion,Phosphoprotein,Reference proteome,Transferase,Transit peptide,Tricarboxylic acid cycle,	chain:Dihydrolipoyllysine-residue succinyltransferase component of 2- oxoglutarate dehydrogenase complex, mitochondrial,domain:Lipoyl-binding,modified residue,sequence conflict,splice variant,transit peptide:Mitochondrion,	0	15194:Dlst~dihydrolipoamide S-succinyltransferase (E2 component of 2-oxo-glutarate complex),3028:Dlst~dihydrolipoamide S-succinyltransferase (E2 component of 2-oxo-glutarate complex),	0	0	2.3.1.61,	100043456:predicted gene 10681(Gm10681),15495:hydroxy-delta-5-steroid dehydrogenase, 3 beta- and steroid delta-isomerase 4(Hsd3b4),22627:tyrosine 3-monooxygenase/tryptophan 5-monooxygenase activation protein, epsilon polypeptide(Ywhae),54401:tyrosine 3-monooxygenase/tryptophan 5-monooxygenase activation protein, beta polypeptide(Ywhab),	0	Neuron-optimal	NA	NA	NA
etfa	electron transferring flavoprotein, alpha polypeptide(Etfa)	ENSMUSG00000032314	110842	NA	NA	NA	NA	-0.0124534	GO:0006082~organic acid metabolic process,GO:0006629~lipid metabolic process,GO:0006631~fatty acid metabolic process,GO:0006635~fatty acid beta-oxidation,GO:0006810~transport,GO:0008152~metabolic process,GO:0009056~catabolic process,GO:0009062~fatty acid catabolic process,GO:0009987~cellular process,GO:0016042~lipid catabolic process,GO:0016054~organic acid catabolic process,GO:0019395~fatty acid…	GO:0005576~extracellular region,GO:0005622~intracellular,GO:0005623~cell,GO:0005737~cytoplasm,GO:0005739~mitochondrion,GO:0005759~mitochondrial matrix,GO:0017133~mitochondrial electron transfer flavoprotein complex,GO:0031974~membrane-enclosed lumen,GO:0031982~vesicle,GO:0031988~membrane-bounded vesicle,GO:0032991~macromolecular complex,GO:0043226~organelle,GO:0043227~membrane-bounded organelle,G…	GO:0000062~fatty-acyl-CoA binding,GO:0000166~nucleotide binding,GO:0003824~catalytic activity,GO:0003995~acyl-CoA dehydrogenase activity,GO:0005488~binding,GO:0005515~protein binding,GO:0009055~electron carrier activity,GO:0016491~oxidoreductase activity,GO:0016627~oxidoreductase activity, acting on the CH-CH group of donors,GO:0036094~small molecule binding,GO:0048037~cofactor binding,GO:0050660…	IPR001308:Electron transfer flavoprotein, alpha subunit,IPR014729:Rossmann-like alpha/beta/alpha sandwich fold,IPR014730:Electron transfer flavoprotein, alpha/beta-subunit, N-terminal,IPR014731:Electron transfer flavoprotein, alpha subunit, C-terminal,IPR018206:Electron transfer flavoprotein, alpha subunit, C-terminal, conserved site,	0	PF00766:Electron transfer flavoprotein FAD-binding domain,PF01012:Electron transfer flavoprotein domain,	R-MMU-611105:R-MMU-611105,	Brain,Hippocampus,Mammary gland,Ovary,Placenta,Small intestine,Uterus,	Acetylation,Complete proteome,Direct protein sequencing,Electron transport,FAD,Flavoprotein,Mitochondrion,Phosphoprotein,Reference proteome,Transit peptide,Transport,	chain:Electron transfer flavoprotein subunit alpha, mitochondrial,modified residue,nucleotide phosphate-binding region:FAD,sequence conflict,transit peptide:Mitochondrion,	0	3028:Etfa~electron transferring flavoprotein, alpha polypeptide,	Energy production and conversion,	0	0	100043456:predicted gene 10681(Gm10681),15495:hydroxy-delta-5-steroid dehydrogenase, 3 beta- and steroid delta-isomerase 4(Hsd3b4),22627:tyrosine 3-monooxygenase/tryptophan 5-monooxygenase activation protein, epsilon polypeptide(Ywhae),66171:6-phosphogluconolactonase(Pgls),	0	Neuron-optimal	NA	NA	NA
Etfb	electron transferring flavoprotein, beta polypeptide(Etfb)	ENSMUSG00000004610	110826	NA	NA	-0.639979	0.0165498	NA	GO:0006082~organic acid metabolic process,GO:0006629~lipid metabolic process,GO:0006631~fatty acid metabolic process,GO:0006635~fatty acid beta-oxidation,GO:0006810~transport,GO:0008152~metabolic process,GO:0009056~catabolic process,GO:0009062~fatty acid catabolic process,GO:0009987~cellular process,GO:0016042~lipid catabolic process,GO:0016054~organic acid catabolic process,GO:0019395~fatty acid…	GO:0005576~extracellular region,GO:0005622~intracellular,GO:0005623~cell,GO:0005737~cytoplasm,GO:0005739~mitochondrion,GO:0005759~mitochondrial matrix,GO:0017133~mitochondrial electron transfer flavoprotein complex,GO:0031974~membrane-enclosed lumen,GO:0031982~vesicle,GO:0031988~membrane-bounded vesicle,GO:0032991~macromolecular complex,GO:0043226~organelle,GO:0043227~membrane-bounded organelle,G…	GO:0009055~electron carrier activity,	IPR000049:Electron transfer flavoprotein, beta-subunit, conserved site,IPR012255:Electron transfer flavoprotein, beta subunit,IPR014729:Rossmann-like alpha/beta/alpha sandwich fold,IPR014730:Electron transfer flavoprotein, alpha/beta-subunit, N-terminal,		PF01012:Electron transfer flavoprotein domain,	R-MMU-611105:R-MMU-611105,	Brain,Hippocampus,Kidney,Macrophage,Mammary tumor,Skeletal muscle,	Acetylation,Complete proteome,Direct protein sequencing,Electron transport,FAD,Flavoprotein,Methylation,Mitochondrion,Phosphoprotein,Proteomics identification,Reference proteome,Transport,	chain:Electron transfer flavoprotein subunit beta,modified residue,sequence conflict,		15194:Etfb~electron transferring flavoprotein, beta polypeptide,16531:Etfb~electron transferring flavoprotein, beta polypeptide,3028:Etfb~electron transferring flavoprotein, beta polypeptide,				100043456:predicted gene 10681(Gm10681),15495:hydroxy-delta-5-steroid dehydrogenase, 3 beta- and steroid delta-isomerase 4(Hsd3b4),16531:potassium large conductance calcium-activated channel, subfamily M, alpha member 1(Kcnma1),22627:tyrosine 3-monooxygenase/tryptophan 5-monooxygenase activation protein, epsilon polypeptide(Ywhae),22629:tyrosine 3-monooxygenase/tryptophan 5-monooxygenase activati…	100041194:AHNAK nucleoprotein 2(Ahnak2),100043813:ribosomal protein S27, retrogene(Rps27rt),100043876:predicted gene 4705(Gm4705),100609:NOL1/NOP2/Sun domain family, member 5(Nsun5),100678:phosphoserine phosphatase(Psph),100763:ubiquitin protein ligase E3C(Ube3c),100862468:NHP2-like protein 1(LOC100862468),101314:BRICK1, SCAR/WAVE actin-nucleating complex subunit(Brk1),102595:pleckstrin homology …	Neuron-optimal	NA	NA	NA
FECH	ferrochelatase(Fech)	ENSMUSG00000024588	14151	NA	NA	-0.628523	NA	-0.0127023	GO:0001932~regulation of protein phosphorylation,GO:0002262~myeloid cell homeostasis,GO:0002376~immune system process,GO:0002520~immune system development,GO:0006066~alcohol metabolic process,GO:0006412~translation,GO:0006413~translational initiation,GO:0006417~regulation of translation,GO:0006446~regulation of translational initiation,GO:0006464~cellular protein modification process,GO:0006468~p…	GO:0005622~intracellular,GO:0005623~cell,GO:0005737~cytoplasm,GO:0005739~mitochondrion,GO:0005740~mitochondrial envelope,GO:0005743~mitochondrial inner membrane,GO:0016020~membrane,GO:0019866~organelle inner membrane,GO:0031090~organelle membrane,GO:0031966~mitochondrial membrane,GO:0031967~organelle envelope,GO:0031975~envelope,GO:0043226~organelle,GO:0043227~membrane-bounded organelle,GO:004322…	GO:0003676~nucleic acid binding,GO:0003723~RNA binding,GO:0003729~mRNA binding,GO:0003824~catalytic activity,GO:0004325~ferrochelatase activity,GO:0005488~binding,GO:0005506~iron ion binding,GO:0016829~lyase activity,GO:0020037~heme binding,GO:0030350~iron-responsive element binding,GO:0043167~ion binding,GO:0043169~cation binding,GO:0044822~poly(A) RNA binding,GO:0046872~metal ion binding,GO:004…	IPR001015:Ferrochelatase,IPR019772:Ferrochelatase, active site,	mmu00860:Porphyrin and chlorophyll metabolism,mmu01100:Metabolic pathways,	PF00762:Ferrochelatase,	R-MMU-189451:R-MMU-189451,	Blastocyst,Bone marrow,Heart,Kidney,Liver,Lung,Mammary tumor. WAP-Tag model. 5 months old,	2Fe-2S,Acetylation,Complete proteome,Direct protein sequencing,Disease mutation,Heme biosynthesis,Iron,Iron-sulfur,Lyase,Membrane,Metal-binding,Mitochondrion,Mitochondrion inner membrane,Porphyrin biosynthesis,Proteomics identification,Reference proteome,Transit peptide,	chain:Ferrochelatase, mitochondrial,metal ion-binding site:Iron-sulfur (2Fe-2S),sequence conflict,sequence variant,transit peptide:Mitochondrion,	0	0	0	0	4.99.1.1,	11306:ATP-binding cassette, sub-family B (MDR/TAP), member 7(Abcb7),22627:tyrosine 3-monooxygenase/tryptophan 5-monooxygenase activation protein, epsilon polypeptide(Ywhae),	109754:cytochrome b5 reductase 3(Cyb5r3),11306:ATP-binding cassette, sub-family B (MDR/TAP), member 7(Abcb7),12857:cytochrome c oxidase subunit IV isoform 1(Cox4i1),	NA	NA	Neuron-central	Astrocyte-central
fh1	fumarate hydratase 1(Fh1)	ENSMUSG00000026526	14194	NA	NA	NA	-0.0170185	0.00722374	GO:0001894~tissue homeostasis,GO:0006082~organic acid metabolic process,GO:0006091~generation of precursor metabolites and energy,GO:0006099~tricarboxylic acid cycle,GO:0006106~fumarate metabolic process,GO:0006108~malate metabolic process,GO:0006461~protein complex assembly,GO:0008152~metabolic process,GO:0009060~aerobic respiration,GO:0009987~cellular process,GO:0015980~energy derivation by oxi…	GO:0005576~extracellular region,GO:0005622~intracellular,GO:0005623~cell,GO:0005737~cytoplasm,GO:0005739~mitochondrion,GO:0005829~cytosol,GO:0031982~vesicle,GO:0031988~membrane-bounded vesicle,GO:0032991~macromolecular complex,GO:0043226~organelle,GO:0043227~membrane-bounded organelle,GO:0043229~intracellular organelle,GO:0043230~extracellular organelle,GO:0043231~intracellular membrane-bounded o…	GO:0003824~catalytic activity,GO:0004333~fumarate hydratase activity,GO:0016829~lyase activity,GO:0016835~carbon-oxygen lyase activity,GO:0016836~hydro-lyase activity,	IPR000362:Fumarate lyase,IPR005677:Fumarate hydratase, class II,IPR008948:L-Aspartase-like,IPR018951:Fumarase C, C-terminal,IPR020557:Fumarate lyase, conserved site,IPR022761:Fumarate lyase, N-terminal,IPR024083:Fumarase/histidase, N-terminal,	mmu00020:Citrate cycle (TCA cycle),mmu00620:Pyruvate metabolism,mmu01100:Metabolic pathways,mmu01130:Biosynthesis of antibiotics,mmu01200:Carbon metabolism,mmu05200:Pathways in cancer,mmu05211:Renal cell carcinoma,	PF00206:Lyase,PF10415:Fumarase C C-terminus,	R-MMU-71403:R-MMU-71403,	Brain,Heart,Hippocampus,Kidney,Liver,	Acetylation,Alternative initiation,Complete proteome,Cytoplasm,Direct protein sequencing,Lyase,Mitochondrion,Phosphoprotein,Proteomics identification,Reference proteome,Transit peptide,Tricarboxylic acid cycle,	binding site:Substrate,chain:Fumarate hydratase, mitochondrial,modified residue,region of interest:B site,region of interest:Substrate binding,sequence conflict,splice variant,transit peptide:Mitochondrion,	0	103573:Xpo1~exportin 1,16531:Fh1~fumarate hydratase 1,3028:Fh1~fumarate hydratase 1,	0	0	4.2.1.2,	100043456:predicted gene 10681(Gm10681),13385:discs, large homolog 4 (Drosophila)(Dlg4),15495:hydroxy-delta-5-steroid dehydrogenase, 3 beta- and steroid delta-isomerase 4(Hsd3b4),16531:potassium large conductance calcium-activated channel, subfamily M, alpha member 1(Kcnma1),22627:tyrosine 3-monooxygenase/tryptophan 5-monooxygenase activation protein, epsilon polypeptide(Ywhae),22631:tyrosine 3-m…	0	Neuron-optimal	NA	NA	NA
FPGS	folylpolyglutamyl synthetase(Fpgs)	ENSMUSG00000009566	14287	NA	NA	-0.862766	NA	NA	GO:0001889~liver development,GO:0006082~organic acid metabolic process,GO:0006536~glutamate metabolic process,GO:0006575~cellular modified amino acid metabolic process,GO:0006725~cellular aromatic compound metabolic process,GO:0006730~one-carbon metabolic process,GO:0006732~coenzyme metabolic process,GO:0006760~folic acid-containing compound metabolic process,GO:0006807~nitrogen compound metaboli…	GO:0005622~intracellular,GO:0005623~cell,GO:0005737~cytoplasm,GO:0005739~mitochondrion,GO:0005740~mitochondrial envelope,GO:0005743~mitochondrial inner membrane,GO:0005759~mitochondrial matrix,GO:0016020~membrane,GO:0019866~organelle inner membrane,GO:0031090~organelle membrane,GO:0031966~mitochondrial membrane,GO:0031967~organelle envelope,GO:0031974~membrane-enclosed lumen,GO:0031975~envelope,G…	GO:0000166~nucleotide binding,GO:0001882~nucleoside binding,GO:0001883~purine nucleoside binding,GO:0003824~catalytic activity,GO:0004326~tetrahydrofolylpolyglutamate synthase activity,GO:0005488~binding,GO:0005524~ATP binding,GO:0016874~ligase activity,GO:0016879~ligase activity, forming carbon-nitrogen bonds,GO:0016881~acid-amino acid ligase activity,GO:0017076~purine nucleotide binding,GO:0030…	IPR001645:Folylpolyglutamate synthetase,IPR004101:Mur ligase, C-terminal,IPR013221:Mur ligase, central,IPR018109:Folylpolyglutamate synthetase, conserved site,IPR023600:Folylpolyglutamate synthase, eukaryota,	mmu00790:Folate biosynthesis,mmu01100:Metabolic pathways,	0	R-MMU-196757:R-MMU-196757,	Activated spleen,Liver,Mammary tumor. WAP-TGF alpha model. 7 months old,	Acetylation,Alternative initiation,Alternative promoter usage,Alternative splicing,ATP-binding,Complete proteome,Cytoplasm,Ligase,Membrane,Mitochondrion,Mitochondrion inner membrane,Nucleotide-binding,One-carbon metabolism,Phosphoprotein,Proteomics identification,Reference proteome,Transit peptide,	chain:Folylpolyglutamate synthase, mitochondrial,modified residue,nucleotide phosphate-binding region:ATP,sequence conflict,splice variant,transit peptide:Mitochondrion,	0	0	0	0	6.3.2.17,	0	0	NA	Astrocyte-optimal	Neuron-central	Astrocyte-central
g6pc3	glucose 6 phosphatase, catalytic, 3(G6pc3)	ENSMUSG00000034793	68401	NA	NA	NA	-0.0128982	NA	GO:0005975~carbohydrate metabolic process,GO:0005996~monosaccharide metabolic process,GO:0006006~glucose metabolic process,GO:0006094~gluconeogenesis,GO:0006793~phosphorus metabolic process,GO:0006796~phosphate-containing compound metabolic process,GO:0006810~transport,GO:0008152~metabolic process,GO:0009058~biosynthetic process,GO:0009987~cellular process,GO:0015712~hexose phosphate transport,GO…	GO:0005622~intracellular,GO:0005623~cell,GO:0005737~cytoplasm,GO:0005783~endoplasmic reticulum,GO:0005789~endoplasmic reticulum membrane,GO:0012505~endomembrane system,GO:0016020~membrane,GO:0016021~integral component of membrane,GO:0030176~integral component of endoplasmic reticulum membrane,GO:0031224~intrinsic component of membrane,GO:0031227~intrinsic component of endoplasmic reticulum membra…	GO:0003824~catalytic activity,GO:0004346~glucose-6-phosphatase activity,GO:0016787~hydrolase activity,GO:0016788~hydrolase activity, acting on ester bonds,GO:0016791~phosphatase activity,GO:0019203~carbohydrate phosphatase activity,GO:0042578~phosphoric ester hydrolase activity,GO:0050308~sugar-phosphatase activity,GO:0050309~sugar-terminal-phosphatase activity,	IPR000326:Phosphatidic acid phosphatase type 2/haloperoxidase,IPR016275:Glucose-6-phosphatase,	mmu00010:Glycolysis / Gluconeogenesis,mmu00052:Galactose metabolism,mmu00500:Starch and sucrose metabolism,mmu01100:Metabolic pathways,mmu04068:FoxO signaling pathway,mmu04151:PI3K-Akt signaling pathway,mmu04152:AMPK signaling pathway,mmu04910:Insulin signaling pathway,mmu04920:Adipocytokine signaling pathway,mmu04922:Glucagon signaling pathway,mmu04931:Insulin resistance,mmu04973:Carbohydrate di…	PF01569:PAP2 superfamily,	R-MMU-70153:R-MMU-70153,	Colon,Kidney,	Complete proteome,Endoplasmic reticulum,Gluconeogenesis,Hydrolase,Membrane,Reference proteome,Transmembrane,Transmembrane helix,	active site:Nucleophile,active site:Proton donor,binding site:Substrate,chain:Glucose-6-phosphatase 3,sequence conflict,topological domain:Cytoplasmic,topological domain:Lumenal,transmembrane region,	0	0	0	0	3.1.3.9,	0	0	NA	Astrocyte-optimal	Neuron-central	Astrocyte-central
GCAT	glycine C-acetyltransferase (2-amino-3-ketobutyrate-coenzyme A ligase)(Gcat)		26912	NA	NA	NA	0.00583525	-0.00778966	GO:0006082~organic acid metabolic process,GO:0006520~cellular amino acid metabolic process,GO:0006544~glycine metabolic process,GO:0006566~threonine metabolic process,GO:0006567~threonine catabolic process,GO:0006807~nitrogen compound metabolic process,GO:0008152~metabolic process,GO:0009056~catabolic process,GO:0009058~biosynthetic process,GO:0009063~cellular amino acid catabolic process,GO:0009…	GO:0005622~intracellular,GO:0005623~cell,GO:0005634~nucleus,GO:0005654~nucleoplasm,GO:0005737~cytoplasm,GO:0005739~mitochondrion,GO:0005740~mitochondrial envelope,GO:0005743~mitochondrial inner membrane,GO:0016020~membrane,GO:0019866~organelle inner membrane,GO:0031090~organelle membrane,GO:0031966~mitochondrial membrane,GO:0031967~organelle envelope,GO:0031974~membrane-enclosed lumen,GO:0031975~…	GO:0003824~catalytic activity,GO:0005488~binding,GO:0008890~glycine C-acetyltransferase activity,GO:0016407~acetyltransferase activity,GO:0016408~C-acyltransferase activity,GO:0016453~C-acetyltransferase activity,GO:0016740~transferase activity,GO:0016746~transferase activity, transferring acyl groups,GO:0016747~transferase activity, transferring acyl groups other than amino-acyl groups,GO:003017…	IPR001917:Aminotransferase, class-II, pyridoxal-phosphate binding site,IPR004839:Aminotransferase, class I/classII,IPR011282:2-amino-3-ketobutyrate coenzyme A ligase,IPR015421:Pyridoxal phosphate-dependent transferase, major region, subdomain 1,IPR015422:Pyridoxal phosphate-dependent transferase, major region, subdomain 2,IPR015424:Pyridoxal phosphate-dependent transferase,	mmu00260:Glycine, serine and threonine metabolism,	PF00155:Aminotransferase class I and II,		Eye,Liver,Lung,Whole body,	Acetylation,Acyltransferase,Complete proteome,Mitochondrion,Nucleus,Proteomics identification,Pyridoxal phosphate,Reference proteome,Transferase,Transit peptide,	chain:2-amino-3-ketobutyrate coenzyme A ligase, mitochondrial,modified residue,transit peptide:Mitochondrion,			Posttranslational modification, protein turnover, chaperones,		2.3.1.29,	22627:tyrosine 3-monooxygenase/tryptophan 5-monooxygenase activation protein, epsilon polypeptide(Ywhae),		NA	NA	Neuron-central	Astrocyte-central
GCDH	glutaryl-Coenzyme A dehydrogenase(Gcdh)	ENSMUSG00000003809	270076	NA	NA	-0.665402	NA	-0.00729419	GO:0006082~organic acid metabolic process,GO:0006568~tryptophan metabolic process,GO:0006576~cellular biogenic amine metabolic process,GO:0006586~indolalkylamine metabolic process,GO:0006629~lipid metabolic process,GO:0006631~fatty acid metabolic process,GO:0006635~fatty acid beta-oxidation,GO:0006637~acyl-CoA metabolic process,GO:0006725~cellular aromatic compound metabolic process,GO:0006732~co…	GO:0005622~intracellular,GO:0005623~cell,GO:0005737~cytoplasm,GO:0005739~mitochondrion,GO:0005740~mitochondrial envelope,GO:0005743~mitochondrial inner membrane,GO:0005759~mitochondrial matrix,GO:0016020~membrane,GO:0019866~organelle inner membrane,GO:0031090~organelle membrane,GO:0031966~mitochondrial membrane,GO:0031967~organelle envelope,GO:0031974~membrane-enclosed lumen,GO:0031975~envelope,G…	GO:0000062~fatty-acyl-CoA binding,GO:0000166~nucleotide binding,GO:0003824~catalytic activity,GO:0003995~acyl-CoA dehydrogenase activity,GO:0004361~glutaryl-CoA dehydrogenase activity,GO:0005488~binding,GO:0009055~electron carrier activity,GO:0016491~oxidoreductase activity,GO:0016627~oxidoreductase activity, acting on the CH-CH group of donors,GO:0036094~small molecule binding,GO:0048037~cofacto…	IPR006089:Acyl-CoA dehydrogenase, conserved site,IPR006091:Acyl-CoA oxidase/dehydrogenase, central domain,IPR009075:Acyl-CoA dehydrogenase/oxidase C-terminal,IPR009100:Acyl-CoA dehydrogenase/oxidase,IPR013786:Acyl-CoA dehydrogenase/oxidase, N-terminal,	mmu00071:Fatty acid degradation,mmu00310:Lysine degradation,mmu00380:Tryptophan metabolism,mmu01100:Metabolic pathways,mmu01130:Biosynthesis of antibiotics,	PF00441:Acyl-CoA dehydrogenase, C-terminal domain,PF02770:Acyl-CoA dehydrogenase, middle domain,PF02771:Acyl-CoA dehydrogenase, N-terminal domain,	R-MMU-71064:R-MMU-71064,	Colon,Kidney,Liver,Thymus,	Acetylation,Complete proteome,FAD,Flavoprotein,Mitochondrion,Oxidoreductase,Proteomics identification,Reference proteome,Transit peptide,	active site:Proton acceptor,binding site:FAD,binding site:FAD; via carbonyl oxygen,binding site:Substrate,binding site:Substrate; via amide nitrogen,binding site:Substrate; via carbonyl oxygen,chain:Glutaryl-CoA dehydrogenase, mitochondrial,nucleotide phosphate-binding region:FAD,region of interest:Substrate binding,transit peptide:Mitochondrion,	0	30011:Gcdh~glutaryl-Coenzyme A dehydrogenase,	Lipid metabolism,	0	1.3.8.6,	100043456:predicted gene 10681(Gm10681),15495:hydroxy-delta-5-steroid dehydrogenase, 3 beta- and steroid delta-isomerase 4(Hsd3b4),22627:tyrosine 3-monooxygenase/tryptophan 5-monooxygenase activation protein, epsilon polypeptide(Ywhae),	0	NA	NA	Neuron-central	Astrocyte-central
gk	glycerol kinase(Gk)	ENSMUSG00000025059	14933	NA	0.666337	0.144536	NA	NA	GO:0005975~carbohydrate metabolic process,GO:0006066~alcohol metabolic process,GO:0006071~glycerol metabolic process,GO:0006072~glycerol-3-phosphate metabolic process,GO:0006629~lipid metabolic process,GO:0006638~neutral lipid metabolic process,GO:0006639~acylglycerol metabolic process,GO:0006641~triglyceride metabolic process,GO:0006793~phosphorus metabolic process,GO:0006796~phosphate-containin…	GO:0005622~intracellular,GO:0005623~cell,GO:0005634~nucleus,GO:0005737~cytoplasm,GO:0005739~mitochondrion,GO:0005740~mitochondrial envelope,GO:0005741~mitochondrial outer membrane,GO:0005829~cytosol,GO:0016020~membrane,GO:0019867~outer membrane,GO:0031090~organelle membrane,GO:0031966~mitochondrial membrane,GO:0031967~organelle envelope,GO:0031968~organelle outer membrane,GO:0031975~envelope,GO:0…	GO:0000166~nucleotide binding,GO:0001882~nucleoside binding,GO:0001883~purine nucleoside binding,GO:0003824~catalytic activity,GO:0004370~glycerol kinase activity,GO:0005488~binding,GO:0005515~protein binding,GO:0005524~ATP binding,GO:0016301~kinase activity,GO:0016740~transferase activity,GO:0016772~transferase activity, transferring phosphorus-containing groups,GO:0016773~phosphotransferase act…	IPR005999:Glycerol kinase,IPR018483:Carbohydrate kinase, FGGY, conserved site,IPR018484:Carbohydrate kinase, FGGY, N-terminal,IPR018485:Carbohydrate kinase, FGGY, C-terminal,	mmu00561:Glycerolipid metabolism,mmu01100:Metabolic pathways,mmu03320:PPAR signaling pathway,	PF00370:FGGY family of carbohydrate kinases, N-terminal domain,PF02782:FGGY family of carbohydrate kinases, C-terminal domain,	R-MMU-75109:R-MMU-75109,	Kidney,Mammary gland,Retina,Small intestine,Thymus,	Alternative splicing,ATP-binding,Complete proteome,Cytoplasm,Glycerol metabolism,Kinase,Membrane,Mitochondrion,Mitochondrion outer membrane,Nucleotide-binding,Proteomics identification,Reference proteome,Transferase,	binding site:ATP,binding site:ATP; via carbonyl oxygen,binding site:Substrate,chain:Glycerol kinase,nucleotide phosphate-binding region:ATP,sequence conflict,splice variant,		6622:Gk~glycerol kinase,			2.7.1.30,	100043456:predicted gene 10681(Gm10681),15495:hydroxy-delta-5-steroid dehydrogenase, 3 beta- and steroid delta-isomerase 4(Hsd3b4),22627:tyrosine 3-monooxygenase/tryptophan 5-monooxygenase activation protein, epsilon polypeptide(Ywhae),22631:tyrosine 3-monooxygenase/tryptophan 5-monooxygenase activation protein, zeta polypeptide(Ywhaz),		NA	NA	Neuron-central	Astrocyte-central
gldc	glycine decarboxylase(Gldc)	ENSMUSG00000024827	104174	NA	NA	NA	-0.00619079	NA	GO:0006082~organic acid metabolic process,GO:0006520~cellular amino acid metabolic process,GO:0006544~glycine metabolic process,GO:0006546~glycine catabolic process,GO:0006807~nitrogen compound metabolic process,GO:0008152~metabolic process,GO:0009056~catabolic process,GO:0009063~cellular amino acid catabolic process,GO:0009069~serine family amino acid metabolic process,GO:0009071~serine family a…	GO:0005622~intracellular,GO:0005623~cell,GO:0005634~nucleus,GO:0005737~cytoplasm,GO:0005739~mitochondrion,GO:0005886~plasma membrane,GO:0005960~glycine cleavage complex,GO:0016020~membrane,GO:0032991~macromolecular complex,GO:0043226~organelle,GO:0043227~membrane-bounded organelle,GO:0043229~intracellular organelle,GO:0043231~intracellular membrane-bounded organelle,GO:0043234~protein complex,GO:…	GO:0003824~catalytic activity,GO:0004375~glycine dehydrogenase (decarboxylating) activity,GO:0005488~binding,GO:0005515~protein binding,GO:0016491~oxidoreductase activity,GO:0016594~glycine binding,GO:0016597~amino acid binding,GO:0016638~oxidoreductase activity, acting on the CH-NH2 group of donors,GO:0016642~oxidoreductase activity, acting on the CH-NH2 group of donors, disulfide as acceptor,GO…	IPR001597:Aromatic amino acid beta-eliminating lyase/threonine aldolase,IPR003437:Glycine cleavage system P protein, homodimeric,IPR015421:Pyridoxal phosphate-dependent transferase, major region, subdomain 1,IPR015424:Pyridoxal phosphate-dependent transferase,IPR020581:Glycine cleavage system P protein,	mmu00260:Glycine, serine and threonine metabolism,mmu00630:Glyoxylate and dicarboxylate metabolism,mmu01100:Metabolic pathways,mmu01130:Biosynthesis of antibiotics,mmu01200:Carbon metabolism,	PF01212:Beta-eliminating lyase,PF02347:Glycine cleavage system P-protein,	R-MMU-6783984:R-MMU-6783984,	Corpora quadrigemina,Eye,Hippocampus,Retina,	Acetylation,Complete proteome,Direct protein sequencing,Mitochondrion,Oxidoreductase,Pyridoxal phosphate,Reference proteome,Transit peptide,	chain:Glycine dehydrogenase [decarboxylating], mitochondrial,modified residue,transit peptide:Mitochondrion,	0	13626:Gldc~glycine decarboxylase,	0	0	1.4.4.2,	22627:tyrosine 3-monooxygenase/tryptophan 5-monooxygenase activation protein, epsilon polypeptide(Ywhae),	0	NA	NA	Neuron-central	Astrocyte-central
GOT1	glutamic-oxaloacetic transaminase 1, soluble(Got1)	ENSMUSG00000025190	14718	NA	NA	0.326205	NA	-0.0418611	GO:0005975~carbohydrate metabolic process,GO:0006066~alcohol metabolic process,GO:0006071~glycerol metabolic process,GO:0006082~organic acid metabolic process,GO:0006103~2-oxoglutarate metabolic process,GO:0006106~fumarate metabolic process,GO:0006107~oxaloacetate metabolic process,GO:0006114~glycerol biosynthetic process,GO:0006520~cellular amino acid metabolic process,GO:0006531~aspartate metab…	GO:0000323~lytic vacuole,GO:0005576~extracellular region,GO:0005622~intracellular,GO:0005623~cell,GO:0005634~nucleus,GO:0005737~cytoplasm,GO:0005764~lysosome,GO:0005773~vacuole,GO:0005829~cytosol,GO:0030424~axon,GO:0031982~vesicle,GO:0031988~membrane-bounded vesicle,GO:0033267~axon part,GO:0042995~cell projection,GO:0043005~neuron projection,GO:0043226~organelle,GO:0043227~membrane-bounded organe…	GO:0003824~catalytic activity,GO:0004069~L-aspartate:2-oxoglutarate aminotransferase activity,GO:0004609~phosphatidylserine decarboxylase activity,GO:0005488~binding,GO:0005515~protein binding,GO:0008483~transaminase activity,GO:0016740~transferase activity,GO:0016769~transferase activity, transferring nitrogenous groups,GO:0016829~lyase activity,GO:0016830~carbon-carbon lyase activity,GO:0016831…	IPR000796:Aspartate/other aminotransferase,IPR004838:Aminotransferases, class-I, pyridoxal-phosphate-binding site,IPR004839:Aminotransferase, class I/classII,IPR015421:Pyridoxal phosphate-dependent transferase, major region, subdomain 1,IPR015424:Pyridoxal phosphate-dependent transferase,	mmu00220:Arginine biosynthesis,mmu00250:Alanine, aspartate and glutamate metabolism,mmu00270:Cysteine and methionine metabolism,mmu00330:Arginine and proline metabolism,mmu00350:Tyrosine metabolism,mmu00360:Phenylalanine metabolism,mmu00400:Phenylalanine, tyrosine and tryptophan biosynthesis,mmu01100:Metabolic pathways,mmu01130:Biosynthesis of antibiotics,mmu01200:Carbon metabolism,mmu01210:2-Oxo…	PF00155:Aminotransferase class I and II,	R-MMU-70263:R-MMU-70263,R-MMU-70614:R-MMU-70614,	Brain,Heart,Hippocampus,Mammary gland,	Amino-acid biosynthesis,Aminotransferase,Complete proteome,Cytoplasm,Direct protein sequencing,Phosphoprotein,Proteomics identification,Pyridoxal phosphate,Reference proteome,Transferase,	binding site:Aspartate,binding site:Aspartate; via amide nitrogen,chain:Aspartate aminotransferase, cytoplasmic,modified residue,sequence conflict,	m_malatePathway:Malate-aspartate shuttle,	16531:Got1~glutamic-oxaloacetic transaminase 1, soluble,			2.6.1.1,2.6.1.3,	100043456:predicted gene 10681(Gm10681),100503605:hemoglobin, beta adult s chain(Hbb-bs),101488143:hemoglobin, beta adult t chain(Hbb-bt),11677:aldo-keto reductase family 1, member B3 (aldose reductase)(Akr1b3),12349:carbonic anhydrase 2(Car2),13385:discs, large homolog 4 (Drosophila)(Dlg4),15122:hemoglobin alpha, adult chain 1(Hba-a1),15129:hemoglobin, beta adult major chain(Hbb-b1),15130:hemogl…		Neuron-optimal	NA	Neuron-central	Astrocyte-central
got2	glutamatic-oxaloacetic transaminase 2, mitochondrial(Got2)	ENSMUSG00000031672	14719	NA	NA	NA	NA	-0.0213583	GO:0006082~organic acid metabolic process,GO:0006103~2-oxoglutarate metabolic process,GO:0006106~fumarate metabolic process,GO:0006107~oxaloacetate metabolic process,GO:0006520~cellular amino acid metabolic process,GO:0006531~aspartate metabolic process,GO:0006532~aspartate biosynthetic process,GO:0006533~aspartate catabolic process,GO:0006536~glutamate metabolic process,GO:0006538~glutamate cata…	GO:0005576~extracellular region,GO:0005622~intracellular,GO:0005623~cell,GO:0005737~cytoplasm,GO:0005739~mitochondrion,GO:0005740~mitochondrial envelope,GO:0005743~mitochondrial inner membrane,GO:0005759~mitochondrial matrix,GO:0005886~plasma membrane,GO:0009986~cell surface,GO:0016020~membrane,GO:0019866~organelle inner membrane,GO:0031090~organelle membrane,GO:0031966~mitochondrial membrane,GO:…	GO:0003676~nucleic acid binding,GO:0003723~RNA binding,GO:0003824~catalytic activity,GO:0004069~L-aspartate:2-oxoglutarate aminotransferase activity,GO:0005488~binding,GO:0005515~protein binding,GO:0005543~phospholipid binding,GO:0008289~lipid binding,GO:0008483~transaminase activity,GO:0016212~kynurenine-oxoglutarate transaminase activity,GO:0016597~amino acid binding,GO:0016740~transferase acti…	IPR000796:Aspartate/other aminotransferase,IPR004838:Aminotransferases, class-I, pyridoxal-phosphate-binding site,IPR004839:Aminotransferase, class I/classII,IPR015421:Pyridoxal phosphate-dependent transferase, major region, subdomain 1,IPR015424:Pyridoxal phosphate-dependent transferase,	mmu00220:Arginine biosynthesis,mmu00250:Alanine, aspartate and glutamate metabolism,mmu00270:Cysteine and methionine metabolism,mmu00330:Arginine and proline metabolism,mmu00350:Tyrosine metabolism,mmu00360:Phenylalanine metabolism,mmu00400:Phenylalanine, tyrosine and tryptophan biosynthesis,mmu01100:Metabolic pathways,mmu01130:Biosynthesis of antibiotics,mmu01200:Carbon metabolism,mmu01210:2-Oxo…	PF00155:Aminotransferase class I and II,	R-MMU-70263:R-MMU-70263,R-MMU-70614:R-MMU-70614,	Bone marrow macrophage,Brain,Cecum,Dendritic cell,Eye,Hippocampus,Liver,Melanocyte,	3D-structure,Acetylation,Aminotransferase,Cell membrane,Complete proteome,Direct protein sequencing,Lipid transport,Membrane,Methylation,Mitochondrion,Nitration,Phosphoprotein,Pyridoxal phosphate,Reference proteome,Transferase,Transit peptide,Transport,	binding site:Aspartate,binding site:Aspartate; via amide nitrogen,chain:Aspartate aminotransferase, mitochondrial,modified residue,sequence conflict,transit peptide:Mitochondrion,	0	0	0	0	2.6.1.1,2.6.1.7,	100043456:predicted gene 10681(Gm10681),14812:glutamate receptor, ionotropic, NMDA2B (epsilon 2)(Grin2b),15495:hydroxy-delta-5-steroid dehydrogenase, 3 beta- and steroid delta-isomerase 4(Hsd3b4),22627:tyrosine 3-monooxygenase/tryptophan 5-monooxygenase activation protein, epsilon polypeptide(Ywhae),22629:tyrosine 3-monooxygenase/tryptophan 5-monooxygenase activation protein, eta polypeptide(Ywha…	100041194:AHNAK nucleoprotein 2(Ahnak2),100043813:ribosomal protein S27, retrogene(Rps27rt),100043876:predicted gene 4705(Gm4705),100609:NOL1/NOP2/Sun domain family, member 5(Nsun5),100678:phosphoserine phosphatase(Psph),100763:ubiquitin protein ligase E3C(Ube3c),100862468:NHP2-like protein 1(LOC100862468),101314:BRICK1, SCAR/WAVE actin-nucleating complex subunit(Brk1),102595:pleckstrin homology …	Neuron-optimal	NA	Neuron-central	Astrocyte-central
GSR	glutathione reductase(Gsr)	ENSMUSG00000031584	14782	NA	0.580639	-0.16881	NA	-0.0120534	GO:0000003~reproduction,GO:0006518~peptide metabolic process,GO:0006575~cellular modified amino acid metabolic process,GO:0006749~glutathione metabolic process,GO:0006790~sulfur compound metabolic process,GO:0006807~nitrogen compound metabolic process,GO:0007276~gamete generation,GO:0007283~spermatogenesis,GO:0008152~metabolic process,GO:0009987~cellular process,GO:0019725~cellular homeostasis,GO…	GO:0005576~extracellular region,GO:0005622~intracellular,GO:0005623~cell,GO:0005737~cytoplasm,GO:0005739~mitochondrion,GO:0005829~cytosol,GO:0005886~plasma membrane,GO:0009897~external side of plasma membrane,GO:0009986~cell surface,GO:0016020~membrane,GO:0031982~vesicle,GO:0031988~membrane-bounded vesicle,GO:0043226~organelle,GO:0043227~membrane-bounded organelle,GO:0043229~intracellular organel…	GO:0000166~nucleotide binding,GO:0003824~catalytic activity,GO:0004362~glutathione-disulfide reductase activity,GO:0005488~binding,GO:0005515~protein binding,GO:0015036~disulfide oxidoreductase activity,GO:0015037~peptide disulfide oxidoreductase activity,GO:0015038~glutathione disulfide oxidoreductase activity,GO:0016209~antioxidant activity,GO:0016491~oxidoreductase activity,GO:0016651~oxidored…	IPR004099:Pyridine nucleotide-disulphide oxidoreductase, dimerisation,IPR006322:Glutathione reductase, eukaryote/bacterial,IPR012999:Pyridine nucleotide-disulphide oxidoreductase, class I, active site,IPR016156:FAD/NAD-linked reductase, dimerisation,IPR023753:Pyridine nucleotide-disulphide oxidoreductase, FAD/NAD(P)-binding domain,	mmu00480:Glutathione metabolism,mmu04918:Thyroid hormone synthesis,	PF02852:Pyridine nucleotide-disulphide oxidoreductase, dimerisation domain,PF07992:Pyridine nucleotide-disulphide oxidoreductase,	R-MMU-3299685:R-MMU-3299685,R-MMU-499943:R-MMU-499943,R-MMU-5628897:R-MMU-5628897,	Bone marrow,Brain,Eye,Mammary tumor metastatized to lung. Tumor arose spontaneously,Thymus,	Acetylation,Alternative initiation,Complete proteome,Cytoplasm,Disulfide bond,FAD,Flavoprotein,Mitochondrion,NADP,Oxidoreductase,Redox-active center,Reference proteome,Transit peptide,	active site:Proton acceptor,chain:Glutathione reductase, mitochondrial,disulfide bond,nucleotide phosphate-binding region:FAD,sequence conflict,splice variant,transit peptide:Mitochondrion,	m_freePathway:Free Radical Induced Apoptosis,				1.8.1.7,	100043456:predicted gene 10681(Gm10681),15495:hydroxy-delta-5-steroid dehydrogenase, 3 beta- and steroid delta-isomerase 4(Hsd3b4),22627:tyrosine 3-monooxygenase/tryptophan 5-monooxygenase activation protein, epsilon polypeptide(Ywhae),66171:6-phosphogluconolactonase(Pgls),		NA	NA	Neuron-central	Astrocyte-central
GYS1	glycogen synthase 1, muscle(Gys1)	ENSMUSG00000003865	14936	0.595387	0.654828	-0.296991	NA	NA	GO:0000271~polysaccharide biosynthetic process,GO:0005975~carbohydrate metabolic process,GO:0005976~polysaccharide metabolic process,GO:0005977~glycogen metabolic process,GO:0005978~glycogen biosynthetic process,GO:0006073~cellular glucan metabolic process,GO:0006091~generation of precursor metabolites and energy,GO:0006112~energy reserve metabolic process,GO:0007275~multicellular organism develo…	GO:0005622~intracellular,GO:0005623~cell,GO:0005737~cytoplasm,GO:0016020~membrane,GO:0016234~inclusion body,GO:0044424~intracellular part,GO:0044464~cell part,	GO:0003824~catalytic activity,GO:0004373~glycogen (starch) synthase activity,GO:0005488~binding,GO:0005515~protein binding,GO:0005536~glucose binding,GO:0008194~UDP-glycosyltransferase activity,GO:0016740~transferase activity,GO:0016757~transferase activity, transferring glycosyl groups,GO:0016758~transferase activity, transferring hexosyl groups,GO:0016772~transferase activity, transferring phos…	IPR008631:Glycogen synthase,	mmu00500:Starch and sucrose metabolism,mmu04151:PI3K-Akt signaling pathway,mmu04152:AMPK signaling pathway,mmu04910:Insulin signaling pathway,mmu04922:Glucagon signaling pathway,mmu04931:Insulin resistance,	PF05693:Glycogen synthase,	R-MMU-3322077:R-MMU-3322077,	Astrocyte,Dendritic cell,Embryo,Liver,Mammary tumor,	Allosteric enzyme,Complete proteome,Glycogen biosynthesis,Glycosyltransferase,Phosphoprotein,Proteomics identification,Reference proteome,Transferase,	binding site:UDP-glucose,chain:Glycogen [starch] synthase, muscle,modified residue,sequence conflict,		9619:Gys1~glycogen synthase 1, muscle,			2.4.1.11,	13853:epilepsy, progressive myoclonic epilepsy, type 2 gene alpha(Epm2a),22627:tyrosine 3-monooxygenase/tryptophan 5-monooxygenase activation protein, epsilon polypeptide(Ywhae),	13853:epilepsy, progressive myoclonic epilepsy, type 2 gene alpha(Epm2a),	NA	Astrocyte-optimal	NA	NA
HADH	hydroxyacyl-Coenzyme A dehydrogenase(Hadh)	ENSMUSG00000027984	15107	NA	-0.429313	NA	NA	0.00770694	GO:0002790~peptide secretion,GO:0002791~regulation of peptide secretion,GO:0002792~negative regulation of peptide secretion,GO:0006082~organic acid metabolic process,GO:0006629~lipid metabolic process,GO:0006631~fatty acid metabolic process,GO:0006635~fatty acid beta-oxidation,GO:0006810~transport,GO:0007154~cell communication,GO:0007267~cell-cell signaling,GO:0008104~protein localization,GO:0008…	GO:0005622~intracellular,GO:0005623~cell,GO:0005634~nucleus,GO:0005654~nucleoplasm,GO:0005737~cytoplasm,GO:0005739~mitochondrion,GO:0005740~mitochondrial envelope,GO:0005743~mitochondrial inner membrane,GO:0005759~mitochondrial matrix,GO:0016020~membrane,GO:0019866~organelle inner membrane,GO:0031090~organelle membrane,GO:0031966~mitochondrial membrane,GO:0031967~organelle envelope,GO:0031974~mem…	GO:0000166~nucleotide binding,GO:0003824~catalytic activity,GO:0003857~3-hydroxyacyl-CoA dehydrogenase activity,GO:0005488~binding,GO:0016491~oxidoreductase activity,GO:0016614~oxidoreductase activity, acting on CH-OH group of donors,GO:0016616~oxidoreductase activity, acting on the CH-OH group of donors, NAD or NADP as acceptor,GO:0036094~small molecule binding,GO:0048037~cofactor binding,GO:005…	IPR006108:3-hydroxyacyl-CoA dehydrogenase, C-terminal,IPR006176:3-hydroxyacyl-CoA dehydrogenase, NAD binding,IPR006180:3-hydroxyacyl-CoA dehydrogenase, conserved site,IPR008927:6-phosphogluconate dehydrogenase, C-terminal-like,IPR013328:Dehydrogenase, multihelical,IPR016040:NAD(P)-binding domain,IPR022694:3-hydroxyacyl-CoA dehydrogenase,	mmu00062:Fatty acid elongation,mmu00071:Fatty acid degradation,mmu00280:Valine, leucine and isoleucine degradation,mmu00310:Lysine degradation,mmu00380:Tryptophan metabolism,mmu00650:Butanoate metabolism,mmu01100:Metabolic pathways,mmu01130:Biosynthesis of antibiotics,mmu01212:Fatty acid metabolism,	PF00725:3-hydroxyacyl-CoA dehydrogenase, C-terminal domain,PF02737:3-hydroxyacyl-CoA dehydrogenase, NAD binding domain,	R-MMU-77310:R-MMU-77310,R-MMU-77346:R-MMU-77346,R-MMU-77348:R-MMU-77348,R-MMU-77350:R-MMU-77350,R-MMU-77352:R-MMU-77352,	Amnion,Extraembryonic tissue,Kidney,Liver,Pancreas,Placenta,	Acetylation,Complete proteome,Fatty acid metabolism,Lipid metabolism,Mitochondrion,NAD,Oxidoreductase,Reference proteome,Transit peptide,	binding site:Coenzyme A,binding site:NAD,chain:Hydroxyacyl-coenzyme A dehydrogenase, mitochondrial,modified residue,nucleotide phosphate-binding region:NAD,sequence conflict,site:Important for catalytic activity,transit peptide:Mitochondrion,		11674:Aldoa~aldolase A, fructose-bisphosphate,3028:Hadh~hydroxyacyl-Coenzyme A dehydrogenase,	Lipid metabolism,		1.1.1.35,	100043456:predicted gene 10681(Gm10681),15495:hydroxy-delta-5-steroid dehydrogenase, 3 beta- and steroid delta-isomerase 4(Hsd3b4),22627:tyrosine 3-monooxygenase/tryptophan 5-monooxygenase activation protein, epsilon polypeptide(Ywhae),22631:tyrosine 3-monooxygenase/tryptophan 5-monooxygenase activation protein, zeta polypeptide(Ywhaz),66171:6-phosphogluconolactonase(Pgls),		NA	NA	Neuron-central	Astrocyte-central
HADHA	hydroxyacyl-Coenzyme A dehydrogenase/3-ketoacyl-Coenzyme A thiolase/enoyl-Coenzyme A hydratase (trifunctional protein), alpha subunit(Hadha)	ENSMUSG00000025745	97212	NA	NA	-0.822939	0.00585033	NA	GO:0006082~organic acid metabolic process,GO:0006629~lipid metabolic process,GO:0006631~fatty acid metabolic process,GO:0006635~fatty acid beta-oxidation,GO:0008152~metabolic process,GO:0009056~catabolic process,GO:0009062~fatty acid catabolic process,GO:0009719~response to endogenous stimulus,GO:0009725~response to hormone,GO:0009987~cellular process,GO:0010033~response to organic substance,GO:0…	GO:0005622~intracellular,GO:0005623~cell,GO:0005737~cytoplasm,GO:0005739~mitochondrion,GO:0005740~mitochondrial envelope,GO:0005743~mitochondrial inner membrane,GO:0005759~mitochondrial matrix,GO:0009295~nucleoid,GO:0016020~membrane,GO:0016507~mitochondrial fatty acid beta-oxidation multienzyme complex,GO:0019866~organelle inner membrane,GO:0031012~extracellular matrix,GO:0031090~organelle membra…	GO:0000062~fatty-acyl-CoA binding,GO:0000166~nucleotide binding,GO:0003824~catalytic activity,GO:0003857~3-hydroxyacyl-CoA dehydrogenase activity,GO:0003988~acetyl-CoA C-acyltransferase activity,GO:0004300~enoyl-CoA hydratase activity,GO:0005488~binding,GO:0005515~protein binding,GO:0016408~C-acyltransferase activity,GO:0016491~oxidoreductase activity,GO:0016508~long-chain-enoyl-CoA hydratase act…	IPR001753:Crotonase superfamily,IPR006108:3-hydroxyacyl-CoA dehydrogenase, C-terminal,IPR006176:3-hydroxyacyl-CoA dehydrogenase, NAD binding,IPR006180:3-hydroxyacyl-CoA dehydrogenase, conserved site,IPR008927:6-phosphogluconate dehydrogenase, C-terminal-like,IPR012803:Fatty acid oxidation complex, alpha subunit, mitochondrial,IPR013328:Dehydrogenase, multihelical,IPR016040:NAD(P)-binding domain,I…	mmu00062:Fatty acid elongation,mmu00071:Fatty acid degradation,mmu00280:Valine, leucine and isoleucine degradation,mmu00310:Lysine degradation,mmu00380:Tryptophan metabolism,mmu00410:beta-Alanine metabolism,mmu00640:Propanoate metabolism,mmu00650:Butanoate metabolism,mmu01040:Biosynthesis of unsaturated fatty acids,mmu01100:Metabolic pathways,mmu01130:Biosynthesis of antibiotics,mmu01200:Carbon m…	PF00378:Enoyl-CoA hydratase/isomerase family,PF00725:3-hydroxyacyl-CoA dehydrogenase, C-terminal domain,PF02737:3-hydroxyacyl-CoA dehydrogenase, NAD binding domain,	R-MMU-1482798:R-MMU-1482798,R-MMU-77285:R-MMU-77285,R-MMU-77305:R-MMU-77305,R-MMU-77310:R-MMU-77310,R-MMU-77346:R-MMU-77346,R-MMU-77348:R-MMU-77348,R-MMU-77350:R-MMU-77350,	Eye,Liver,Olfactory epithelium,Skin,Whole body,	Acetylation,Complete proteome,Fatty acid metabolism,Lipid metabolism,Lyase,Methylation,Mitochondrion,Multifunctional enzyme,NAD,Oxidoreductase,Phosphoprotein,Reference proteome,Transit peptide,	chain:Trifunctional enzyme subunit alpha, mitochondrial,modified residue,sequence conflict,site:Important for catalytic activity,transit peptide:Mitochondrion,	0	13626:Hadha~hydroxyacyl-Coenzyme A dehydrogenase/3-ketoacyl-Coenzyme A thiolase/enoyl-Coenzyme A hydratase (trifunctional protein), alpha subunit,15194:Hadha~hydroxyacyl-Coenzyme A dehydrogenase/3-ketoacyl-Coenzyme A thiolase/enoyl-Coenzyme A hydratase (trifunctional protein), alpha subunit,18999:Hadha~hydroxyacyl-Coenzyme A dehydrogenase/3-ketoacyl-Coenzyme A thiolase/enoyl-Coenzyme A hydratase …	0	0	1.1.1.211,4.2.1.17,	100043456:predicted gene 10681(Gm10681),101502:hydroxy-delta-5-steroid dehydrogenase, 3 beta- and steroid delta-isomerase 7(Hsd3b7),15495:hydroxy-delta-5-steroid dehydrogenase, 3 beta- and steroid delta-isomerase 4(Hsd3b4),18754:protein kinase C, epsilon(Prkce),22627:tyrosine 3-monooxygenase/tryptophan 5-monooxygenase activation protein, epsilon polypeptide(Ywhae),22631:tyrosine 3-monooxygenase/t…	0	NA	NA	Neuron-central	Astrocyte-central
HADHB	hydroxyacyl-Coenzyme A dehydrogenase/3-ketoacyl-Coenzyme A thiolase/enoyl-Coenzyme A hydratase (trifunctional protein), beta subunit(Hadhb)	ENSMUSG00000059447	231086	NA	NA	-0.759772	-0.01642	-0.0183623	GO:0006082~organic acid metabolic process,GO:0006629~lipid metabolic process,GO:0006631~fatty acid metabolic process,GO:0006635~fatty acid beta-oxidation,GO:0008152~metabolic process,GO:0009056~catabolic process,GO:0009062~fatty acid catabolic process,GO:0009987~cellular process,GO:0016042~lipid catabolic process,GO:0016054~organic acid catabolic process,GO:0019395~fatty acid oxidation,GO:0019752…	GO:0005576~extracellular region,GO:0005622~intracellular,GO:0005623~cell,GO:0005737~cytoplasm,GO:0005739~mitochondrion,GO:0005740~mitochondrial envelope,GO:0005741~mitochondrial outer membrane,GO:0005743~mitochondrial inner membrane,GO:0005759~mitochondrial matrix,GO:0005783~endoplasmic reticulum,GO:0009295~nucleoid,GO:0012505~endomembrane system,GO:0016020~membrane,GO:0016507~mitochondrial fatty…	GO:0000062~fatty-acyl-CoA binding,GO:0000166~nucleotide binding,GO:0003676~nucleic acid binding,GO:0003723~RNA binding,GO:0003824~catalytic activity,GO:0003857~3-hydroxyacyl-CoA dehydrogenase activity,GO:0003988~acetyl-CoA C-acyltransferase activity,GO:0004300~enoyl-CoA hydratase activity,GO:0005488~binding,GO:0005515~protein binding,GO:0016408~C-acyltransferase activity,GO:0016491~oxidoreductase…	IPR002155:Thiolase,IPR016039:Thiolase-like,IPR020610:Thiolase, active site,IPR020613:Thiolase, conserved site,IPR020615:Thiolase, acyl-enzyme intermediate active site,IPR020616:Thiolase, N-terminal,IPR020617:Thiolase, C-terminal,	mmu00062:Fatty acid elongation,mmu00071:Fatty acid degradation,mmu00280:Valine, leucine and isoleucine degradation,mmu01100:Metabolic pathways,mmu01130:Biosynthesis of antibiotics,mmu01212:Fatty acid metabolism,	PF00108:Thiolase, N-terminal domain,PF02803:Thiolase, C-terminal domain,	R-MMU-1482798:R-MMU-1482798,R-MMU-77285:R-MMU-77285,R-MMU-77305:R-MMU-77305,R-MMU-77310:R-MMU-77310,R-MMU-77346:R-MMU-77346,R-MMU-77348:R-MMU-77348,R-MMU-77350:R-MMU-77350,	Bone marrow,Colon,Hippocampus,Liver,Mammary tumor,Spinal ganglion,Testis,Thymus,	Acetylation,Acyltransferase,Complete proteome,Endoplasmic reticulum,Fatty acid metabolism,Lipid metabolism,Membrane,Mitochondrion,Mitochondrion inner membrane,Mitochondrion outer membrane,Proteomics identification,Reference proteome,Transferase,Transit peptide,	active site:Acyl-thioester intermediate,active site:Proton acceptor,chain:Trifunctional enzyme subunit beta, mitochondrial,modified residue,sequence conflict,transit peptide:Mitochondrion,	0	3028:Hadhb~hydroxyacyl-Coenzyme A dehydrogenase/3-ketoacyl-Coenzyme A thiolase/enoyl-Coenzyme A hydratase (trifunctional protein), beta subunit,320299:Hadhb~hydroxyacyl-Coenzyme A dehydrogenase/3-ketoacyl-Coenzyme A thiolase/enoyl-Coenzyme A hydratase (trifunctional protein), beta subunit,	0	0	2.3.1.16,	100043456:predicted gene 10681(Gm10681),15495:hydroxy-delta-5-steroid dehydrogenase, 3 beta- and steroid delta-isomerase 4(Hsd3b4),18754:protein kinase C, epsilon(Prkce),22627:tyrosine 3-monooxygenase/tryptophan 5-monooxygenase activation protein, epsilon polypeptide(Ywhae),22631:tyrosine 3-monooxygenase/tryptophan 5-monooxygenase activation protein, zeta polypeptide(Ywhaz),320299:IQ calmodulin-b…	0	NA	NA	Neuron-central	Astrocyte-central
hagh	hydroxyacyl glutathione hydrolase(Hagh)	ENSMUSG00000024158	14651	NA	NA	NA	-0.00826707	-0.0129642	GO:0005975~carbohydrate metabolic process,GO:0006081~cellular aldehyde metabolic process,GO:0006082~organic acid metabolic process,GO:0006089~lactate metabolic process,GO:0006518~peptide metabolic process,GO:0006575~cellular modified amino acid metabolic process,GO:0006749~glutathione metabolic process,GO:0006750~glutathione biosynthetic process,GO:0006790~sulfur compound metabolic process,GO:000…	GO:0005576~extracellular region,GO:0005622~intracellular,GO:0005623~cell,GO:0005737~cytoplasm,GO:0005739~mitochondrion,GO:0005759~mitochondrial matrix,GO:0031974~membrane-enclosed lumen,GO:0031982~vesicle,GO:0031988~membrane-bounded vesicle,GO:0043226~organelle,GO:0043227~membrane-bounded organelle,GO:0043229~intracellular organelle,GO:0043230~extracellular organelle,GO:0043231~intracellular memb…	GO:0003824~catalytic activity,GO:0004416~hydroxyacylglutathione hydrolase activity,GO:0005488~binding,GO:0016787~hydrolase activity,GO:0016788~hydrolase activity, acting on ester bonds,GO:0016790~thiolester hydrolase activity,GO:0043167~ion binding,GO:0043169~cation binding,GO:0046872~metal ion binding,	IPR001279:Beta-lactamase-like,IPR017782:Hydroxyacylglutathione hydrolase,	mmu00620:Pyruvate metabolism,	PF00753:Metallo-beta-lactamase superfamily,	R-MMU-70268:R-MMU-70268,	Liver,	Acetylation,Alternative initiation,Alternative splicing,Complete proteome,Cytoplasm,Hydrolase,Metal-binding,Mitochondrion,Proteomics identification,Reference proteome,Transit peptide,Zinc,	chain:Hydroxyacylglutathione hydrolase, mitochondrial,metal ion-binding site:Zinc 1,metal ion-binding site:Zinc 2,modified residue,region of interest:Substrate,sequence conflict,splice variant,transit peptide:Mitochondrion,	0	0	0	0	3.1.2.6,	100043456:predicted gene 10681(Gm10681),101502:hydroxy-delta-5-steroid dehydrogenase, 3 beta- and steroid delta-isomerase 7(Hsd3b7),15495:hydroxy-delta-5-steroid dehydrogenase, 3 beta- and steroid delta-isomerase 4(Hsd3b4),22627:tyrosine 3-monooxygenase/tryptophan 5-monooxygenase activation protein, epsilon polypeptide(Ywhae),22631:tyrosine 3-monooxygenase/tryptophan 5-monooxygenase activation pr…	0	NA	NA	Neuron-central	Astrocyte-central
HAGHL	hydroxyacylglutathione hydrolase-like(Haghl)	ENSMUSG00000061046	68977	NA	NA	-0.409545	0.00732401	0.0149755	GO:0006081~cellular aldehyde metabolic process,GO:0006082~organic acid metabolic process,GO:0006089~lactate metabolic process,GO:0008152~metabolic process,GO:0009056~catabolic process,GO:0009438~methylglyoxal metabolic process,GO:0009987~cellular process,GO:0019243~methylglyoxal catabolic process to D-lactate via S-lactoyl-glutathione,GO:0019752~carboxylic acid metabolic process,GO:0032787~monoca…		GO:0003824~catalytic activity,GO:0004416~hydroxyacylglutathione hydrolase activity,GO:0005488~binding,GO:0016787~hydrolase activity,GO:0016788~hydrolase activity, acting on ester bonds,GO:0016790~thiolester hydrolase activity,GO:0043167~ion binding,GO:0043169~cation binding,GO:0046872~metal ion binding,	IPR001279:Beta-lactamase-like,IPR017782:Hydroxyacylglutathione hydrolase,	mmu00620:Pyruvate metabolism,	PF00753:Metallo-beta-lactamase superfamily,		Brain,Cerebellum,Mammary tumor,	Alternative splicing,Complete proteome,Hydrolase,Metal-binding,Proteomics identification,Reference proteome,Zinc,	chain:Hydroxyacylglutathione hydrolase-like protein,metal ion-binding site:Zinc 1,metal ion-binding site:Zinc 2,splice variant,					3.1.2.-,	22627:tyrosine 3-monooxygenase/tryptophan 5-monooxygenase activation protein, epsilon polypeptide(Ywhae),		NA	NA	Neuron-central	Astrocyte-central
hibadh	3-hydroxyisobutyrate dehydrogenase(Hibadh)	ENSMUSG00000029776	58875	NA	NA	NA	-0.0104401	-0.012124	GO:0006082~organic acid metabolic process,GO:0006520~cellular amino acid metabolic process,GO:0006573~valine metabolic process,GO:0006574~valine catabolic process,GO:0006807~nitrogen compound metabolic process,GO:0008152~metabolic process,GO:0009056~catabolic process,GO:0009063~cellular amino acid catabolic process,GO:0009081~branched-chain amino acid metabolic process,GO:0009083~branched-chain a…	GO:0005622~intracellular,GO:0005623~cell,GO:0005737~cytoplasm,GO:0005739~mitochondrion,GO:0043226~organelle,GO:0043227~membrane-bounded organelle,GO:0043229~intracellular organelle,GO:0043231~intracellular membrane-bounded organelle,GO:0044424~intracellular part,GO:0044444~cytoplasmic part,GO:0044464~cell part,	GO:0000166~nucleotide binding,GO:0003824~catalytic activity,GO:0004616~phosphogluconate dehydrogenase (decarboxylating) activity,GO:0005488~binding,GO:0008442~3-hydroxyisobutyrate dehydrogenase activity,GO:0016491~oxidoreductase activity,GO:0016614~oxidoreductase activity, acting on CH-OH group of donors,GO:0016616~oxidoreductase activity, acting on the CH-OH group of donors, NAD or NADP as accep…	IPR002204:3-hydroxyisobutyrate dehydrogenase-related, conserved site,IPR006115:6-phosphogluconate dehydrogenase, NADP-binding,IPR008927:6-phosphogluconate dehydrogenase, C-terminal-like,IPR011548:3-hydroxyisobutyrate dehydrogenase,IPR013328:Dehydrogenase, multihelical,IPR015815:Hydroxy monocarboxylic acid anion dehydrogenase, HIBADH-type,IPR016040:NAD(P)-binding domain,	mmu00280:Valine, leucine and isoleucine degradation,mmu01100:Metabolic pathways,	PF03446:NAD binding domain of 6-phosphogluconate dehydrogenase,PF14833:NAD-binding of NADP-dependent 3-hydroxyisobutyrate dehydrogenase,	R-MMU-70895:R-MMU-70895,	Olfactory bulb,Testis,	Acetylation,Branched-chain amino acid catabolism,Complete proteome,Mitochondrion,NAD,Oxidoreductase,Reference proteome,Transit peptide,	binding site:NAD,binding site:NAD; via amide nitrogen,chain:3-hydroxyisobutyrate dehydrogenase, mitochondrial,nucleotide phosphate-binding region:NAD,sequence conflict,transit peptide:Mitochondrion,	0	3028:Hibadh~3-hydroxyisobutyrate dehydrogenase,	0	0	1.1.1.31,	100043456:predicted gene 10681(Gm10681),15495:hydroxy-delta-5-steroid dehydrogenase, 3 beta- and steroid delta-isomerase 4(Hsd3b4),22627:tyrosine 3-monooxygenase/tryptophan 5-monooxygenase activation protein, epsilon polypeptide(Ywhae),	0	NA	NA	Neuron-central	Astrocyte-central
HMGCLL1	3-hydroxymethyl-3-methylglutaryl-Coenzyme A lyase-like 1(Hmgcll1)	ENSMUSG00000007908	208982	NA	-0.620001	-0.938323	NA	NA	GO:0008152~metabolic process,GO:0009058~biosynthetic process,GO:0009987~cellular process,GO:0044237~cellular metabolic process,GO:0044249~cellular biosynthetic process,GO:0044281~small molecule metabolic process,GO:0044283~small molecule biosynthetic process,GO:0044699~single-organism process,GO:0044710~single-organism metabolic process,GO:0044711~single-organism biosynthetic process,GO:0044763~s…	GO:0005622~intracellular,GO:0005623~cell,GO:0005737~cytoplasm,GO:0005783~endoplasmic reticulum,GO:0005789~endoplasmic reticulum membrane,GO:0005829~cytosol,GO:0012505~endomembrane system,GO:0016020~membrane,GO:0016021~integral component of membrane,GO:0031224~intrinsic component of membrane,GO:0042175~nuclear outer membrane-endoplasmic reticulum membrane network,GO:0043226~organelle,GO:0043227~me…	GO:0003824~catalytic activity,GO:0004419~hydroxymethylglutaryl-CoA lyase activity,GO:0005488~binding,GO:0016829~lyase activity,GO:0016830~carbon-carbon lyase activity,GO:0016833~oxo-acid-lyase activity,GO:0043167~ion binding,GO:0043169~cation binding,GO:0046872~metal ion binding,	IPR000891:Pyruvate carboxyltransferase,IPR013785:Aldolase-type TIM barrel,	mmu00072:Synthesis and degradation of ketone bodies,mmu00280:Valine, leucine and isoleucine degradation,mmu00650:Butanoate metabolism,mmu01100:Metabolic pathways,mmu04146:Peroxisome,	PF00682:HMGL-like,	R-MMU-77111:R-MMU-77111,	Eye,Hippocampus,	Complete proteome,Cytoplasm,Endoplasmic reticulum,Lipoprotein,Lyase,Membrane,Metal-binding,Myristate,Proteomics identification,Reference proteome,Transmembrane,Transmembrane helix,	binding site:Substrate,chain:Probable 3-hydroxymethyl-3- methylglutaryl-CoA lyase 2,metal ion-binding site:Divalent metal cation,modified residue,					4.1.3.4,			Neuron-optimal	NA	NA	NA
HMGCS1	3-hydroxy-3-methylglutaryl-Coenzyme A synthase 1(Hmgcs1)	ENSMUSG00000093930	208715	NA	NA	1.06314	-0.030268	-0.0253448	GO:0000003~reproduction,GO:0001889~liver development,GO:0003006~developmental process involved in reproduction,GO:0006066~alcohol metabolic process,GO:0006629~lipid metabolic process,GO:0006694~steroid biosynthetic process,GO:0006695~cholesterol biosynthetic process,GO:0006720~isoprenoid metabolic process,GO:0007275~multicellular organism development,GO:0007399~nervous system development,GO:00074…	GO:0005622~intracellular,GO:0005623~cell,GO:0005634~nucleus,GO:0005654~nucleoplasm,GO:0005737~cytoplasm,GO:0005829~cytosol,GO:0005886~plasma membrane,GO:0016020~membrane,GO:0031974~membrane-enclosed lumen,GO:0031981~nuclear lumen,GO:0043226~organelle,GO:0043227~membrane-bounded organelle,GO:0043229~intracellular organelle,GO:0043231~intracellular membrane-bounded organelle,GO:0043233~organelle lu…	GO:0003824~catalytic activity,GO:0004421~hydroxymethylglutaryl-CoA synthase activity,GO:0005488~binding,GO:0005515~protein binding,GO:0008144~drug binding,GO:0016740~transferase activity,GO:0016746~transferase activity, transferring acyl groups,GO:0016853~isomerase activity,GO:0036094~small molecule binding,GO:0042802~identical protein binding,GO:0042803~protein homodimerization activity,GO:00431…	IPR000590:Hydroxymethylglutaryl-coenzyme A synthase, active site,IPR010122:Hydroxymethylglutaryl-CoA synthase, eukaryotic,IPR013528:Hydroxymethylglutaryl-coenzyme A synthase, N-terminal,IPR013746:Hydroxymethylglutaryl-coenzyme A synthase C-terminal,IPR016039:Thiolase-like,	mmu00072:Synthesis and degradation of ketone bodies,mmu00280:Valine, leucine and isoleucine degradation,mmu00650:Butanoate metabolism,mmu00900:Terpenoid backbone biosynthesis,mmu01100:Metabolic pathways,mmu01130:Biosynthesis of antibiotics,	PF01154:Hydroxymethylglutaryl-coenzyme A synthase N terminal,PF08540:Hydroxymethylglutaryl-coenzyme A synthase C terminal,	R-MMU-191273:R-MMU-191273,	Eye,Hippocampus,In vitro fertilized eggs,Liver,Mammary tumor,Muellerian duct,Testis,	Acetylation,Cholesterol biosynthesis,Cholesterol metabolism,Complete proteome,Cytoplasm,Direct protein sequencing,Lipid biosynthesis,Lipid metabolism,Phosphoprotein,Reference proteome,Steroid biosynthesis,Steroid metabolism,Sterol biosynthesis,Sterol metabolism,Transferase,	chain:Hydroxymethylglutaryl-CoA synthase, cytoplasmic,modified residue,	m_s1pPathway:SREBP control of lipid synthesis,	3028:Hmgcs1~3-hydroxy-3-methylglutaryl-Coenzyme A synthase 1,			2.3.3.10,	22627:tyrosine 3-monooxygenase/tryptophan 5-monooxygenase activation protein, epsilon polypeptide(Ywhae),66171:6-phosphogluconolactonase(Pgls),		Neuron-optimal	NA	Neuron-central	Astrocyte-central
HMGCS2	3-hydroxy-3-methylglutaryl-Coenzyme A synthase 2(Hmgcs2)	ENSMUSG00000027875	15360	-0.468238	-0.622382	NA	NA	0.0272426	GO:0006066~alcohol metabolic process,GO:0006629~lipid metabolic process,GO:0006694~steroid biosynthetic process,GO:0006695~cholesterol biosynthetic process,GO:0006720~isoprenoid metabolic process,GO:0008152~metabolic process,GO:0008202~steroid metabolic process,GO:0008203~cholesterol metabolic process,GO:0008299~isoprenoid biosynthetic process,GO:0008610~lipid biosynthetic process,GO:0009058~bios…	GO:0005622~intracellular,GO:0005623~cell,GO:0005737~cytoplasm,GO:0005739~mitochondrion,GO:0005740~mitochondrial envelope,GO:0005743~mitochondrial inner membrane,GO:0005759~mitochondrial matrix,GO:0016020~membrane,GO:0019866~organelle inner membrane,GO:0031090~organelle membrane,GO:0031966~mitochondrial membrane,GO:0031967~organelle envelope,GO:0031974~membrane-enclosed lumen,GO:0031975~envelope,G…	GO:0003824~catalytic activity,GO:0004421~hydroxymethylglutaryl-CoA synthase activity,GO:0016740~transferase activity,GO:0016746~transferase activity, transferring acyl groups,GO:0046912~transferase activity, transferring acyl groups, acyl groups converted into alkyl on transfer,	IPR000590:Hydroxymethylglutaryl-coenzyme A synthase, active site,IPR010122:Hydroxymethylglutaryl-CoA synthase, eukaryotic,IPR013528:Hydroxymethylglutaryl-coenzyme A synthase, N-terminal,IPR013746:Hydroxymethylglutaryl-coenzyme A synthase C-terminal,IPR016039:Thiolase-like,	mmu00072:Synthesis and degradation of ketone bodies,mmu00280:Valine, leucine and isoleucine degradation,mmu00650:Butanoate metabolism,mmu00900:Terpenoid backbone biosynthesis,mmu01100:Metabolic pathways,mmu01130:Biosynthesis of antibiotics,	PF01154:Hydroxymethylglutaryl-coenzyme A synthase N terminal,PF08540:Hydroxymethylglutaryl-coenzyme A synthase C terminal,	R-MMU-77111:R-MMU-77111,	Colon,Liver,	Acetylation,Cholesterol biosynthesis,Cholesterol metabolism,Complete proteome,Lipid biosynthesis,Lipid metabolism,Mitochondrion,Phosphoprotein,Reference proteome,Steroid biosynthesis,Steroid metabolism,Sterol biosynthesis,Sterol metabolism,Transferase,Transit peptide,	chain:Hydroxymethylglutaryl-CoA synthase, mitochondrial,modified residue,sequence conflict,transit peptide:Mitochondrion,					2.3.3.10,	22627:tyrosine 3-monooxygenase/tryptophan 5-monooxygenase activation protein, epsilon polypeptide(Ywhae),		Neuron-optimal	NA	Neuron-central	Astrocyte-central
idh1	isocitrate dehydrogenase 1 (NADP+), soluble(Idh1)	ENSMUSG00000025950	15926	NA	NA	NA	-0.0280654	-0.0284882	GO:0000003~reproduction,GO:0003006~developmental process involved in reproduction,GO:0005975~carbohydrate metabolic process,GO:0006082~organic acid metabolic process,GO:0006091~generation of precursor metabolites and energy,GO:0006097~glyoxylate cycle,GO:0006099~tricarboxylic acid cycle,GO:0006102~isocitrate metabolic process,GO:0006103~2-oxoglutarate metabolic process,GO:0006518~peptide metaboli…	GO:0005576~extracellular region,GO:0005622~intracellular,GO:0005623~cell,GO:0005737~cytoplasm,GO:0005739~mitochondrion,GO:0005777~peroxisome,GO:0005829~cytosol,GO:0005911~cell-cell junction,GO:0005912~adherens junction,GO:0005913~cell-cell adherens junction,GO:0030054~cell junction,GO:0031982~vesicle,GO:0031988~membrane-bounded vesicle,GO:0042579~microbody,GO:0043226~organelle,GO:0043227~membrane…	GO:0000166~nucleotide binding,GO:0000287~magnesium ion binding,GO:0003824~catalytic activity,GO:0004448~isocitrate dehydrogenase activity,GO:0004450~isocitrate dehydrogenase (NADP+) activity,GO:0005102~receptor binding,GO:0005488~binding,GO:0005515~protein binding,GO:0016491~oxidoreductase activity,GO:0016614~oxidoreductase activity, acting on CH-OH group of donors,GO:0016616~oxidoreductase activ…	IPR004790:Isocitrate dehydrogenase NADP-dependent,IPR019818:Isocitrate/isopropylmalate dehydrogenase, conserved site,IPR024084:Isopropylmalate dehydrogenase-like domain,	mmu00020:Citrate cycle (TCA cycle),mmu00480:Glutathione metabolism,mmu01100:Metabolic pathways,mmu01130:Biosynthesis of antibiotics,mmu01200:Carbon metabolism,mmu01210:2-Oxocarboxylic acid metabolism,mmu01230:Biosynthesis of amino acids,mmu04146:Peroxisome,	PF00180:Isocitrate/isopropylmalate dehydrogenase,	R-MMU-389542:R-MMU-389542,	Amnion,Bone marrow,Brain,Embryonic body below diaphragm region,Liver,Lung,Sympathetic ganglion,	3D-structure,Acetylation,Complete proteome,Cytoplasm,Direct protein sequencing,Glyoxylate bypass,Magnesium,Manganese,Metal-binding,NADP,Oxidoreductase,Phosphoprotein,Proteomics identification,Reference proteome,Tricarboxylic acid cycle,	binding site:NADP,binding site:NADP; via amide nitrogen and carbonyl oxygen,binding site:Substrate,chain:Isocitrate dehydrogenase [NADP] cytoplasmic,helix,metal ion-binding site:Magnesium or manganese,modified residue,nucleotide phosphate-binding region:NADP,region of interest:Substrate binding,site:Critical for catalysis,strand,turn,	0	3028:Idh1~isocitrate dehydrogenase 1 (NADP+), soluble,	0	0	1.1.1.42,	100043456:predicted gene 10681(Gm10681),101502:hydroxy-delta-5-steroid dehydrogenase, 3 beta- and steroid delta-isomerase 7(Hsd3b7),15495:hydroxy-delta-5-steroid dehydrogenase, 3 beta- and steroid delta-isomerase 4(Hsd3b4),22627:tyrosine 3-monooxygenase/tryptophan 5-monooxygenase activation protein, epsilon polypeptide(Ywhae),22631:tyrosine 3-monooxygenase/tryptophan 5-monooxygenase activation pr…	0	Neuron-optimal	NA	NA	NA
IDH2	isocitrate dehydrogenase 2 (NADP+), mitochondrial(Idh2)	ENSMUSG00000030541	269951	NA	NA	-0.525011	0.00533444	-0.0140338	GO:0005975~carbohydrate metabolic process,GO:0006082~organic acid metabolic process,GO:0006091~generation of precursor metabolites and energy,GO:0006097~glyoxylate cycle,GO:0006099~tricarboxylic acid cycle,GO:0006102~isocitrate metabolic process,GO:0006103~2-oxoglutarate metabolic process,GO:0006139~nucleobase-containing compound metabolic process,GO:0006725~cellular aromatic compound metabolic p…	GO:0005576~extracellular region,GO:0005622~intracellular,GO:0005623~cell,GO:0005737~cytoplasm,GO:0005739~mitochondrion,GO:0005740~mitochondrial envelope,GO:0005743~mitochondrial inner membrane,GO:0005777~peroxisome,GO:0005829~cytosol,GO:0016020~membrane,GO:0019866~organelle inner membrane,GO:0031090~organelle membrane,GO:0031966~mitochondrial membrane,GO:0031967~organelle envelope,GO:0031975~enve…	GO:0000166~nucleotide binding,GO:0000287~magnesium ion binding,GO:0003824~catalytic activity,GO:0004448~isocitrate dehydrogenase activity,GO:0004450~isocitrate dehydrogenase (NADP+) activity,GO:0005488~binding,GO:0016491~oxidoreductase activity,GO:0016614~oxidoreductase activity, acting on CH-OH group of donors,GO:0016616~oxidoreductase activity, acting on the CH-OH group of donors, NAD or NADP a…	IPR004790:Isocitrate dehydrogenase NADP-dependent,IPR019818:Isocitrate/isopropylmalate dehydrogenase, conserved site,IPR024084:Isopropylmalate dehydrogenase-like domain,	mmu00020:Citrate cycle (TCA cycle),mmu00480:Glutathione metabolism,mmu01100:Metabolic pathways,mmu01130:Biosynthesis of antibiotics,mmu01200:Carbon metabolism,mmu01210:2-Oxocarboxylic acid metabolism,mmu01230:Biosynthesis of amino acids,mmu04146:Peroxisome,	PF00180:Isocitrate/isopropylmalate dehydrogenase,	R-MMU-71403:R-MMU-71403,	Brain,Embryo,Heart,Liver,Mammary tumor,Thymus,	Acetylation,Complete proteome,Direct protein sequencing,Glyoxylate bypass,Magnesium,Manganese,Metal-binding,Mitochondrion,NADP,Oxidoreductase,Proteomics identification,Reference proteome,Stress response,Transit peptide,Tricarboxylic acid cycle,	binding site:NADP,binding site:NADP; via amide nitrogen and carbonyl oxygen,binding site:Substrate,chain:Isocitrate dehydrogenase [NADP], mitochondrial,metal ion-binding site:Magnesium or manganese,modified residue,nucleotide phosphate-binding region:NADP,region of interest:Substrate binding,sequence conflict,site:Critical for catalysis,transit peptide:Mitochondrion,					1.1.1.42,	100043456:predicted gene 10681(Gm10681),15495:hydroxy-delta-5-steroid dehydrogenase, 3 beta- and steroid delta-isomerase 4(Hsd3b4),22627:tyrosine 3-monooxygenase/tryptophan 5-monooxygenase activation protein, epsilon polypeptide(Ywhae),22629:tyrosine 3-monooxygenase/tryptophan 5-monooxygenase activation protein, eta polypeptide(Ywhah),54401:tyrosine 3-monooxygenase/tryptophan 5-monooxygenase acti…	100041194:AHNAK nucleoprotein 2(Ahnak2),100043813:ribosomal protein S27, retrogene(Rps27rt),100043876:predicted gene 4705(Gm4705),100609:NOL1/NOP2/Sun domain family, member 5(Nsun5),100678:phosphoserine phosphatase(Psph),100763:ubiquitin protein ligase E3C(Ube3c),100862468:NHP2-like protein 1(LOC100862468),101314:BRICK1, SCAR/WAVE actin-nucleating complex subunit(Brk1),102595:pleckstrin homology …	Neuron-optimal	NA	NA	NA
IREB2	iron responsive element binding protein 2(Ireb2)	ENSMUSG00000032293	64602	NA	NA	-0.037609	NA	NA	GO:0000041~transition metal ion transport,GO:0002262~myeloid cell homeostasis,GO:0002376~immune system process,GO:0002520~immune system development,GO:0002521~leukocyte differentiation,GO:0002573~myeloid leukocyte differentiation,GO:0003008~system process,GO:0006412~translation,GO:0006417~regulation of translation,GO:0006518~peptide metabolic process,GO:0006725~cellular aromatic compound metaboli…	GO:0005622~intracellular,GO:0005623~cell,GO:0005737~cytoplasm,GO:0005739~mitochondrion,GO:0005783~endoplasmic reticulum,GO:0005794~Golgi apparatus,GO:0005829~cytosol,GO:0012505~endomembrane system,GO:0043226~organelle,GO:0043227~membrane-bounded organelle,GO:0043229~intracellular organelle,GO:0043231~intracellular membrane-bounded organelle,GO:0044424~intracellular part,GO:0044444~cytoplasmic par…	GO:0003676~nucleic acid binding,GO:0003723~RNA binding,GO:0003729~mRNA binding,GO:0005488~binding,GO:0030350~iron-responsive element binding,GO:0030371~translation repressor activity,GO:0043167~ion binding,GO:0043169~cation binding,GO:0044822~poly(A) RNA binding,GO:0045182~translation regulator activity,GO:0046872~metal ion binding,GO:0051536~iron-sulfur cluster binding,GO:0051539~4 iron, 4 sulfu…	IPR000573:Aconitase A/isopropylmalate dehydratase small subunit, swivel,IPR001030:Aconitase/3-isopropylmalate dehydratase large subunit, alpha/beta/alpha,IPR006249:Aconitase/iron regulatory protein 2,IPR015928:Aconitase/3-isopropylmalate dehydratase, swivel,IPR015931:Aconitase/3-isopropylmalate dehydratase large subunit, alpha/beta/alpha, subdomain 1/3,IPR015932:Aconitase/3-isopropylmalate dehydr…		PF00330:Aconitase family (aconitate hydratase),PF00694:Aconitase C-terminal domain,		Diencephalon,Mammary tumor,	4Fe-4S,Complete proteome,Cytoplasm,Iron,Iron-sulfur,Metal-binding,Reference proteome,RNA-binding,Ubl conjugation,	chain:Iron-responsive element-binding protein 2,metal ion-binding site:Iron-sulfur (4Fe-4S),modified residue,								Neuron-optimal	NA	NA	NA
itpa	inosine triphosphatase (nucleoside triphosphate pyrophosphatase)(Itpa)	ENSMUSG00000074797	16434	NA	NA	NA	NA	-0.00716535	GO:0006139~nucleobase-containing compound metabolic process,GO:0006163~purine nucleotide metabolic process,GO:0006193~ITP catabolic process,GO:0006195~purine nucleotide catabolic process,GO:0006725~cellular aromatic compound metabolic process,GO:0006753~nucleoside phosphate metabolic process,GO:0006793~phosphorus metabolic process,GO:0006796~phosphate-containing compound metabolic process,GO:0006…	GO:0005622~intracellular,GO:0005623~cell,GO:0005737~cytoplasm,GO:0044424~intracellular part,GO:0044464~cell part,	GO:0000166~nucleotide binding,GO:0003824~catalytic activity,GO:0005488~binding,GO:0016462~pyrophosphatase activity,GO:0016787~hydrolase activity,GO:0016817~hydrolase activity, acting on acid anhydrides,GO:0016818~hydrolase activity, acting on acid anhydrides, in phosphorus-containing anhydrides,GO:0035870~dITP diphosphatase activity,GO:0036094~small molecule binding,GO:0036220~ITP diphosphatase a…	IPR002637:Ham1-like protein,IPR027502:Inosine triphosphate pyrophosphatase,	mmu00230:Purine metabolism,mmu00983:Drug metabolism - other enzymes,mmu01100:Metabolic pathways,	PF01725:Ham1 family,	R-MMU-15869:R-MMU-15869,	Egg,Eye,Mammary tumor. WAP-Tag model. 5 months old,Small intestine,Thymus,	Acetylation,Complete proteome,Cytoplasm,Hydrolase,Magnesium,Manganese,Metal-binding,Nucleotide metabolism,Nucleotide-binding,Phosphoprotein,Reference proteome,	chain:Inosine triphosphate pyrophosphatase,metal ion-binding site:Magnesium,modified residue,sequence conflict,	0	0	0	0	3.6.1.9,	22627:tyrosine 3-monooxygenase/tryptophan 5-monooxygenase activation protein, epsilon polypeptide(Ywhae),22631:tyrosine 3-monooxygenase/tryptophan 5-monooxygenase activation protein, zeta polypeptide(Ywhaz),54126:Rho guanine nucleotide exchange factor (GEF7)(Arhgef7),66171:6-phosphogluconolactonase(Pgls),	0	NA	NA	Neuron-central	Astrocyte-central
LDHA	lactate dehydrogenase A(Ldha)	ENSMUSG00000063229	16828	0.699275	0.580698	0.285132	NA	-0.0388464	GO:0005975~carbohydrate metabolic process,GO:0005996~monosaccharide metabolic process,GO:0006006~glucose metabolic process,GO:0006007~glucose catabolic process,GO:0006082~organic acid metabolic process,GO:0006089~lactate metabolic process,GO:0006090~pyruvate metabolic process,GO:0006091~generation of precursor metabolites and energy,GO:0006113~fermentation,GO:0006139~nucleobase-containing compoun…	GO:0005576~extracellular region,GO:0005622~intracellular,GO:0005623~cell,GO:0005634~nucleus,GO:0005737~cytoplasm,GO:0005739~mitochondrion,GO:0005829~cytosol,GO:0005911~cell-cell junction,GO:0005912~adherens junction,GO:0005913~cell-cell adherens junction,GO:0005929~cilium,GO:0016020~membrane,GO:0016021~integral component of membrane,GO:0030054~cell junction,GO:0031224~intrinsic component of membr…	GO:0003824~catalytic activity,GO:0004457~lactate dehydrogenase activity,GO:0004459~L-lactate dehydrogenase activity,GO:0005488~binding,GO:0005515~protein binding,GO:0016491~oxidoreductase activity,GO:0016614~oxidoreductase activity, acting on CH-OH group of donors,GO:0016616~oxidoreductase activity, acting on the CH-OH group of donors, NAD or NADP as acceptor,GO:0045296~cadherin binding,GO:005083…	IPR001236:Lactate/malate dehydrogenase, N-terminal,IPR001557:L-lactate/malate dehydrogenase,IPR011304:L-lactate dehydrogenase,IPR015955:Lactate dehydrogenase/glycoside hydrolase, family 4, C-terminal,IPR016040:NAD(P)-binding domain,IPR018177:L-lactate dehydrogenase, active site,IPR022383:Lactate/malate dehydrogenase, C-terminal,	mmu00010:Glycolysis / Gluconeogenesis,mmu00270:Cysteine and methionine metabolism,mmu00620:Pyruvate metabolism,mmu00640:Propanoate metabolism,mmu01100:Metabolic pathways,mmu01130:Biosynthesis of antibiotics,mmu04922:Glucagon signaling pathway,	PF00056:lactate/malate dehydrogenase, NAD binding domain,PF02866:lactate/malate dehydrogenase, alpha/beta C-terminal domain,	R-MMU-70268:R-MMU-70268,	Bone marrow,Brain,Heart,Hippocampus,Kidney,Liver,Mammary tumor metastatized to lung. Tumor arose spontaneously,Mast cell,Stomach,Trophoblast stem cell,	Acetylation,Complete proteome,Cytoplasm,Direct protein sequencing,Membrane,NAD,Oxidoreductase,Phosphoprotein,Proteomics identification,Reference proteome,Transmembrane,Transmembrane helix,Ubl conjugation,	active site:Proton acceptor,binding site:NAD,binding site:NAD or substrate,binding site:Substrate,chain:L-lactate dehydrogenase A chain,modified residue,nucleotide phosphate-binding region:NAD,sequence conflict,		14389:Ldha~lactate dehydrogenase A,14681:Ldha~lactate dehydrogenase A,15194:Ldha~lactate dehydrogenase A,16531:Ldha~lactate dehydrogenase A,217331:Ldha~lactate dehydrogenase A,3028:Ldha~lactate dehydrogenase A,53885:Ldha~lactate dehydrogenase A,67731:Ldha~lactate dehydrogenase A,			1.1.1.27,	101502:hydroxy-delta-5-steroid dehydrogenase, 3 beta- and steroid delta-isomerase 7(Hsd3b7),104394:E2F transcription factor 4(E2f4),11991:heterogeneous nuclear ribonucleoprotein D(Hnrnpd),12617:centromere protein C1(Cenpc1),13385:discs, large homolog 4 (Drosophila)(Dlg4),14389:growth factor receptor bound protein 2-associated protein 2(Gab2),14534:K(lysine) acetyltransferase 2A(Kat2a),14812:gluta…	100040531:dynein light chain Tctex-type 1F(Dynlt1f),100040563:dynein light chain Tctex-type 1C(Dynlt1c),100310872:dynein light chain Tctex-type 1A(Dynlt1a),102414:CDC-like kinase 3(Clk3),102920:centromere protein I(Cenpi),104721:DEAD (Asp-Glu-Ala-Asp) box polypeptide 1(Ddx1),105203:family with sequence similarity 208, member B(Fam208b),106344:replication factor C (activator 1) 4(Rfc4),107932:chro…	NA	NA	Neuron-central	Astrocyte-central
ldhb	lactate dehydrogenase B(Ldhb)	ENSMUSG00000030246	16832	NA	NA	NA	0.0128228	-0.0148691	GO:0005975~carbohydrate metabolic process,GO:0006082~organic acid metabolic process,GO:0006089~lactate metabolic process,GO:0006090~pyruvate metabolic process,GO:0006139~nucleobase-containing compound metabolic process,GO:0006725~cellular aromatic compound metabolic process,GO:0006732~coenzyme metabolic process,GO:0006733~oxidoreduction coenzyme metabolic process,GO:0006753~nucleoside phosphate m…	GO:0005576~extracellular region,GO:0005622~intracellular,GO:0005623~cell,GO:0005737~cytoplasm,GO:0005739~mitochondrion,GO:0016020~membrane,GO:0031982~vesicle,GO:0031988~membrane-bounded vesicle,GO:0043209~myelin sheath,GO:0043226~organelle,GO:0043227~membrane-bounded organelle,GO:0043229~intracellular organelle,GO:0043230~extracellular organelle,GO:0043231~intracellular membrane-bounded organelle…	GO:0000166~nucleotide binding,GO:0003824~catalytic activity,GO:0004457~lactate dehydrogenase activity,GO:0004459~L-lactate dehydrogenase activity,GO:0005488~binding,GO:0005515~protein binding,GO:0016491~oxidoreductase activity,GO:0016614~oxidoreductase activity, acting on CH-OH group of donors,GO:0016616~oxidoreductase activity, acting on the CH-OH group of donors, NAD or NADP as acceptor,GO:0019…	IPR001236:Lactate/malate dehydrogenase, N-terminal,IPR001557:L-lactate/malate dehydrogenase,IPR011304:L-lactate dehydrogenase,IPR015955:Lactate dehydrogenase/glycoside hydrolase, family 4, C-terminal,IPR016040:NAD(P)-binding domain,IPR018177:L-lactate dehydrogenase, active site,IPR022383:Lactate/malate dehydrogenase, C-terminal,	mmu00010:Glycolysis / Gluconeogenesis,mmu00270:Cysteine and methionine metabolism,mmu00620:Pyruvate metabolism,mmu00640:Propanoate metabolism,mmu01100:Metabolic pathways,mmu01130:Biosynthesis of antibiotics,mmu04922:Glucagon signaling pathway,	PF00056:lactate/malate dehydrogenase, NAD binding domain,PF02866:lactate/malate dehydrogenase, alpha/beta C-terminal domain,	R-MMU-70268:R-MMU-70268,	Brain,Cerebellum,Head,Hippocampus,Kidney,Testes,	Acetylation,Complete proteome,Cytoplasm,Direct protein sequencing,NAD,Oxidoreductase,Phosphoprotein,Proteomics identification,Reference proteome,	active site:Proton acceptor,binding site:NAD,binding site:NAD or substrate,binding site:Substrate,chain:L-lactate dehydrogenase B chain,modified residue,nucleotide phosphate-binding region:NAD,	0	15194:Ldhb~lactate dehydrogenase B,16531:Ldhb~lactate dehydrogenase B,216274:Ldhb~lactate dehydrogenase B,3028:Ldhb~lactate dehydrogenase B,	0	0	1.1.1.27,	11964:ATPase, H+ transporting, lysosomal V1 subunit A(Atp6v1a),13385:discs, large homolog 4 (Drosophila)(Dlg4),14812:glutamate receptor, ionotropic, NMDA2B (epsilon 2)(Grin2b),16531:potassium large conductance calcium-activated channel, subfamily M, alpha member 1(Kcnma1),216274:centrosomal protein 290(Cep290),22627:tyrosine 3-monooxygenase/tryptophan 5-monooxygenase activation protein, epsilon p…	0	NA	NA	Neuron-central	Astrocyte-central
lhpp	phospholysine phosphohistidine inorganic pyrophosphate phosphatase(Lhpp)	ENSMUSG00000030946	76429	NA	NA	NA	0.00537142	NA	GO:0006464~cellular protein modification process,GO:0006470~protein dephosphorylation,GO:0006793~phosphorus metabolic process,GO:0006796~phosphate-containing compound metabolic process,GO:0008152~metabolic process,GO:0009987~cellular process,GO:0016311~dephosphorylation,GO:0019538~protein metabolic process,GO:0036211~protein modification process,GO:0043170~macromolecule metabolic process,GO:00434…	GO:0005622~intracellular,GO:0005623~cell,GO:0005634~nucleus,GO:0005654~nucleoplasm,GO:0005737~cytoplasm,GO:0005829~cytosol,GO:0031974~membrane-enclosed lumen,GO:0031981~nuclear lumen,GO:0043226~organelle,GO:0043227~membrane-bounded organelle,GO:0043229~intracellular organelle,GO:0043231~intracellular membrane-bounded organelle,GO:0043233~organelle lumen,GO:0044422~organelle part,GO:0044424~intrac…	GO:0000287~magnesium ion binding,GO:0003824~catalytic activity,GO:0004427~inorganic diphosphatase activity,GO:0005488~binding,GO:0005515~protein binding,GO:0008969~phosphohistidine phosphatase activity,GO:0016462~pyrophosphatase activity,GO:0016787~hydrolase activity,GO:0016788~hydrolase activity, acting on ester bonds,GO:0016791~phosphatase activity,GO:0016817~hydrolase activity, acting on acid …	IPR006355:HAD-superfamily hydrolase, subfamily IIA, hypothetical 2,IPR006357:HAD-superfamily hydrolase, subfamily IIA,IPR023214:HAD-like domain,IPR023215:Nitrophenylphosphatase-like domain,	mmu00190:Oxidative phosphorylation,	PF13344:Haloacid dehalogenase-like hydrolase,	R-MMU-73817:R-MMU-73817,	Corpora quadrigemina,Mammary gland,Tongue,	Alternative splicing,Complete proteome,Cytoplasm,Hydrolase,Magnesium,Metal-binding,Nucleus,Reference proteome,	chain:Phospholysine phosphohistidine inorganic pyrophosphate phosphatase,splice variant,	0	0	0	0	3.1.3.-,3.6.1.1,	66171:6-phosphogluconolactonase(Pgls),	0	NA	Astrocyte-optimal	Neuron-central	Astrocyte-central
mccc1	methylcrotonoyl-Coenzyme A carboxylase 1 (alpha)(Mccc1)	ENSMUSG00000027709	72039	NA	NA	NA	NA	-0.00919437	GO:0006082~organic acid metabolic process,GO:0006520~cellular amino acid metabolic process,GO:0006551~leucine metabolic process,GO:0006552~leucine catabolic process,GO:0006807~nitrogen compound metabolic process,GO:0008152~metabolic process,GO:0009056~catabolic process,GO:0009063~cellular amino acid catabolic process,GO:0009987~cellular process,GO:0016054~organic acid catabolic process,GO:0019752…	GO:0002169~3-methylcrotonyl-CoA carboxylase complex, mitochondrial,GO:0005622~intracellular,GO:0005623~cell,GO:0005737~cytoplasm,GO:0005739~mitochondrion,GO:0005740~mitochondrial envelope,GO:0005743~mitochondrial inner membrane,GO:0005759~mitochondrial matrix,GO:0016020~membrane,GO:0019866~organelle inner membrane,GO:0031090~organelle membrane,GO:0031966~mitochondrial membrane,GO:0031967~organell…	GO:0000166~nucleotide binding,GO:0001882~nucleoside binding,GO:0001883~purine nucleoside binding,GO:0003824~catalytic activity,GO:0004075~biotin carboxylase activity,GO:0004485~methylcrotonoyl-CoA carboxylase activity,GO:0005488~binding,GO:0005524~ATP binding,GO:0016421~CoA carboxylase activity,GO:0016874~ligase activity,GO:0016879~ligase activity, forming carbon-nitrogen bonds,GO:0016885~ligase …	IPR000089:Biotin/lipoyl attachment,IPR001882:Biotin-binding site,IPR005479:Carbamoyl-phosphate synthetase large subunit-like, ATP-binding domain,IPR005481:Carbamoyl-phosphate synthase, large subunit, N-terminal,IPR005482:Biotin carboxylase, C-terminal,IPR011053:Single hybrid motif,IPR011054:Rudiment single hybrid motif,IPR011761:ATP-grasp fold,IPR011764:Biotin carboxylation domain,IPR013815:ATP-g…	mmu00280:Valine, leucine and isoleucine degradation,mmu01100:Metabolic pathways,	PF00289:Carbamoyl-phosphate synthase L chain, N-terminal domain,PF00364:Biotin-requiring enzyme,PF02785:Biotin carboxylase C-terminal domain,PF02786:Carbamoyl-phosphate synthase L chain, ATP binding domain,	R-MMU-196780:R-MMU-196780,R-MMU-70895:R-MMU-70895,	Embryonic limb,Heart,Kidney,Pancreas,Tongue,	Acetylation,ATP-binding,Biotin,Complete proteome,Ligase,Mitochondrion,Nucleotide-binding,Proteomics identification,Reference proteome,Transit peptide,	binding site:ATP,chain:Methylcrotonoyl-CoA carboxylase subunit alpha, mitochondrial,domain:ATP-grasp,domain:Biotin carboxylation,domain:Biotinyl-binding,modified residue,sequence conflict,transit peptide:Mitochondrion,	0	3028:Mccc1~methylcrotonoyl-Coenzyme A carboxylase 1 (alpha),	Lipid metabolism,	0	6.4.1.4,	100043456:predicted gene 10681(Gm10681),14056:enhancer of zeste 2 polycomb repressive complex 2 subunit(Ezh2),15495:hydroxy-delta-5-steroid dehydrogenase, 3 beta- and steroid delta-isomerase 4(Hsd3b4),22627:tyrosine 3-monooxygenase/tryptophan 5-monooxygenase activation protein, epsilon polypeptide(Ywhae),22631:tyrosine 3-monooxygenase/tryptophan 5-monooxygenase activation protein, zeta polypeptid…	0	NA	NA	Neuron-central	Astrocyte-central
MCCC2	methylcrotonoyl-Coenzyme A carboxylase 2 (beta)(Mccc2)	ENSMUSG00000021646	78038	NA	NA	-0.690804	NA	NA	GO:0006082~organic acid metabolic process,GO:0006139~nucleobase-containing compound metabolic process,GO:0006163~purine nucleotide metabolic process,GO:0006520~cellular amino acid metabolic process,GO:0006551~leucine metabolic process,GO:0006552~leucine catabolic process,GO:0006725~cellular aromatic compound metabolic process,GO:0006732~coenzyme metabolic process,GO:0006753~nucleoside phosphate m…	GO:0002169~3-methylcrotonyl-CoA carboxylase complex, mitochondrial,GO:0005622~intracellular,GO:0005623~cell,GO:0005737~cytoplasm,GO:0005739~mitochondrion,GO:0005759~mitochondrial matrix,GO:0031974~membrane-enclosed lumen,GO:0032991~macromolecular complex,GO:0043226~organelle,GO:0043227~membrane-bounded organelle,GO:0043229~intracellular organelle,GO:0043231~intracellular membrane-bounded organell…	GO:0000166~nucleotide binding,GO:0001882~nucleoside binding,GO:0001883~purine nucleoside binding,GO:0003824~catalytic activity,GO:0004485~methylcrotonoyl-CoA carboxylase activity,GO:0005488~binding,GO:0005524~ATP binding,GO:0016421~CoA carboxylase activity,GO:0016874~ligase activity,GO:0016885~ligase activity, forming carbon-carbon bonds,GO:0017076~purine nucleotide binding,GO:0030554~adenyl nucl…	IPR000022:Carboxyl transferase,IPR011762:Acetyl-coenzyme A carboxyltransferase, N-terminal,IPR011763:Acetyl-coenzyme A carboxyltransferase, C-terminal,	mmu00280:Valine, leucine and isoleucine degradation,mmu01100:Metabolic pathways,	PF01039:Carboxyl transferase domain,	R-MMU-196780:R-MMU-196780,R-MMU-70895:R-MMU-70895,	Brain,Liver,Mammary gland,Oviduct,Placenta,Stomach,Testis,	Acetylation,ATP-binding,Complete proteome,Ligase,Mitochondrion,Nucleotide-binding,Reference proteome,Transit peptide,	chain:Methylcrotonoyl-CoA carboxylase beta chain, mitochondrial,domain:Carboxyltransferase,region of interest:Acyl-CoA binding,sequence conflict,transit peptide:Mitochondrion,	0	3028:Mccc2~methylcrotonoyl-Coenzyme A carboxylase 2 (beta),	Lipid metabolism,	0	6.4.1.4,	100043456:predicted gene 10681(Gm10681),14056:enhancer of zeste 2 polycomb repressive complex 2 subunit(Ezh2),15495:hydroxy-delta-5-steroid dehydrogenase, 3 beta- and steroid delta-isomerase 4(Hsd3b4),22627:tyrosine 3-monooxygenase/tryptophan 5-monooxygenase activation protein, epsilon polypeptide(Ywhae),22631:tyrosine 3-monooxygenase/tryptophan 5-monooxygenase activation protein, zeta polypeptid…	0	NA	NA	Neuron-central	Astrocyte-central
mdh1	malate dehydrogenase 1, NAD (soluble)(Mdh1)	ENSMUSG00000020321	17449	NA	NA	NA	0.00657003	-0.0485966	GO:0000422~mitophagy,GO:0000423~macromitophagy,GO:0002230~positive regulation of defense response to virus by host,GO:0002252~immune effector process,GO:0002376~immune system process,GO:0002682~regulation of immune system process,GO:0002697~regulation of immune effector process,GO:0002831~regulation of response to biotic stimulus,GO:0005975~carbohydrate metabolic process,GO:0006082~organic acid m…	GO:0005576~extracellular region,GO:0005615~extracellular space,GO:0005622~intracellular,GO:0005623~cell,GO:0005737~cytoplasm,GO:0005739~mitochondrion,GO:0005813~centrosome,GO:0005815~microtubule organizing center,GO:0005829~cytosol,GO:0005856~cytoskeleton,GO:0015630~microtubule cytoskeleton,GO:0031982~vesicle,GO:0031988~membrane-bounded vesicle,GO:0043209~myelin sheath,GO:0043226~organelle,GO:004…	GO:0000166~nucleotide binding,GO:0003824~catalytic activity,GO:0005488~binding,GO:0016491~oxidoreductase activity,GO:0016614~oxidoreductase activity, acting on CH-OH group of donors,GO:0016615~malate dehydrogenase activity,GO:0016616~oxidoreductase activity, acting on the CH-OH group of donors, NAD or NADP as acceptor,GO:0030060~L-malate dehydrogenase activity,GO:0036094~small molecule binding,GO…	IPR001236:Lactate/malate dehydrogenase, N-terminal,IPR001252:Malate dehydrogenase, active site,IPR001557:L-lactate/malate dehydrogenase,IPR010945:Malate dehydrogenase, type 2,IPR011274:Malate dehydrogenase, NAD-dependent, cytosolic,IPR015955:Lactate dehydrogenase/glycoside hydrolase, family 4, C-terminal,IPR016040:NAD(P)-binding domain,IPR022383:Lactate/malate dehydrogenase, C-terminal,	mmu00020:Citrate cycle (TCA cycle),mmu00270:Cysteine and methionine metabolism,mmu00620:Pyruvate metabolism,mmu00630:Glyoxylate and dicarboxylate metabolism,mmu01100:Metabolic pathways,mmu01130:Biosynthesis of antibiotics,mmu01200:Carbon metabolism,mmu04964:Proximal tubule bicarbonate reclamation,	PF00056:lactate/malate dehydrogenase, NAD binding domain,PF02866:lactate/malate dehydrogenase, alpha/beta C-terminal domain,	R-MMU-70263:R-MMU-70263,	Brain,Cerebellum,Hippocampus,Liver,Mammary gland,Stomach,	Acetylation,Complete proteome,Cytoplasm,Direct protein sequencing,Methylation,NAD,Oxidoreductase,Phosphoprotein,Proteomics identification,Reference proteome,Tricarboxylic acid cycle,Ubl conjugation,	active site:Proton acceptor,binding site:NAD,binding site:Substrate,chain:Malate dehydrogenase, cytoplasmic,modified residue,nucleotide phosphate-binding region:NAD,sequence conflict,	m_malatePathway:Malate-aspartate shuttle,m_malatexPathway:Shuttle for transfer of acetyl groups from mitochondria to the cytosol,	3028:Mdh1~malate dehydrogenase 1, NAD (soluble),	0	0	1.1.1.37,	100043456:predicted gene 10681(Gm10681),101502:hydroxy-delta-5-steroid dehydrogenase, 3 beta- and steroid delta-isomerase 7(Hsd3b7),14718:glutamic-oxaloacetic transaminase 1, soluble(Got1),15495:hydroxy-delta-5-steroid dehydrogenase, 3 beta- and steroid delta-isomerase 4(Hsd3b4),22627:tyrosine 3-monooxygenase/tryptophan 5-monooxygenase activation protein, epsilon polypeptide(Ywhae),22629:tyrosine…	100041194:AHNAK nucleoprotein 2(Ahnak2),100043813:ribosomal protein S27, retrogene(Rps27rt),100043876:predicted gene 4705(Gm4705),100609:NOL1/NOP2/Sun domain family, member 5(Nsun5),100678:phosphoserine phosphatase(Psph),100763:ubiquitin protein ligase E3C(Ube3c),100862468:NHP2-like protein 1(LOC100862468),101314:BRICK1, SCAR/WAVE actin-nucleating complex subunit(Brk1),102595:pleckstrin homology …	Neuron-optimal	NA	Neuron-central	Astrocyte-central
mdh2	malate dehydrogenase 2, NAD (mitochondrial)(Mdh2)	ENSMUSG00000019179	17448	NA	NA	NA	0.00972632	-0.0321013	GO:0005975~carbohydrate metabolic process,GO:0006082~organic acid metabolic process,GO:0006091~generation of precursor metabolites and energy,GO:0006099~tricarboxylic acid cycle,GO:0006107~oxaloacetate metabolic process,GO:0006108~malate metabolic process,GO:0006139~nucleobase-containing compound metabolic process,GO:0006464~cellular protein modification process,GO:0006473~protein acetylation,GO:…	GO:0005576~extracellular region,GO:0005622~intracellular,GO:0005623~cell,GO:0005634~nucleus,GO:0005654~nucleoplasm,GO:0005737~cytoplasm,GO:0005739~mitochondrion,GO:0005740~mitochondrial envelope,GO:0005743~mitochondrial inner membrane,GO:0005759~mitochondrial matrix,GO:0005886~plasma membrane,GO:0016020~membrane,GO:0019866~organelle inner membrane,GO:0031090~organelle membrane,GO:0031966~mitochon…	GO:0003676~nucleic acid binding,GO:0003723~RNA binding,GO:0003824~catalytic activity,GO:0005488~binding,GO:0005515~protein binding,GO:0016491~oxidoreductase activity,GO:0016614~oxidoreductase activity, acting on CH-OH group of donors,GO:0016615~malate dehydrogenase activity,GO:0016616~oxidoreductase activity, acting on the CH-OH group of donors, NAD or NADP as acceptor,GO:0030060~L-malate dehydro…	IPR001236:Lactate/malate dehydrogenase, N-terminal,IPR001252:Malate dehydrogenase, active site,IPR001557:L-lactate/malate dehydrogenase,IPR010097:Malate dehydrogenase, type 1,IPR015955:Lactate dehydrogenase/glycoside hydrolase, family 4, C-terminal,IPR016040:NAD(P)-binding domain,IPR022383:Lactate/malate dehydrogenase, C-terminal,	mmu00020:Citrate cycle (TCA cycle),mmu00270:Cysteine and methionine metabolism,mmu00620:Pyruvate metabolism,mmu00630:Glyoxylate and dicarboxylate metabolism,mmu01100:Metabolic pathways,mmu01130:Biosynthesis of antibiotics,mmu01200:Carbon metabolism,	PF00056:lactate/malate dehydrogenase, NAD binding domain,PF02866:lactate/malate dehydrogenase, alpha/beta C-terminal domain,	R-MMU-70263:R-MMU-70263,R-MMU-71403:R-MMU-71403,	Brain,Cerebellum,Hippocampus,Kidney,Liver,Mammary tumor,	Acetylation,Complete proteome,Direct protein sequencing,Glycoprotein,Mitochondrion,NAD,Oxidoreductase,Phosphoprotein,Proteomics identification,Reference proteome,Transit peptide,Tricarboxylic acid cycle,	active site:Proton acceptor,binding site:NAD,binding site:Substrate,chain:Malate dehydrogenase, mitochondrial,modified residue,nucleotide phosphate-binding region:NAD,sequence conflict,transit peptide:Mitochondrion,	0	12974:Cs~citrate synthase,16531:Mdh2~malate dehydrogenase 2, NAD (mitochondrial),24654:Mdh2~malate dehydrogenase 2, NAD (mitochondrial),67731:Mdh2~malate dehydrogenase 2, NAD (mitochondrial),78610:Mdh2~malate dehydrogenase 2, NAD (mitochondrial),	0	0	1.1.1.37,	100043456:predicted gene 10681(Gm10681),15495:hydroxy-delta-5-steroid dehydrogenase, 3 beta- and steroid delta-isomerase 4(Hsd3b4),16531:potassium large conductance calcium-activated channel, subfamily M, alpha member 1(Kcnma1),22627:tyrosine 3-monooxygenase/tryptophan 5-monooxygenase activation protein, epsilon polypeptide(Ywhae),22629:tyrosine 3-monooxygenase/tryptophan 5-monooxygenase activati…	100041194:AHNAK nucleoprotein 2(Ahnak2),100043813:ribosomal protein S27, retrogene(Rps27rt),100043876:predicted gene 4705(Gm4705),100609:NOL1/NOP2/Sun domain family, member 5(Nsun5),100678:phosphoserine phosphatase(Psph),100763:ubiquitin protein ligase E3C(Ube3c),100862468:NHP2-like protein 1(LOC100862468),101314:BRICK1, SCAR/WAVE actin-nucleating complex subunit(Brk1),102595:pleckstrin homology …	Neuron-optimal	NA	Neuron-central	Astrocyte-central
MTHFD1	methylenetetrahydrofolate dehydrogenase (NADP+ dependent), methenyltetrahydrofolate cyclohydrolase, formyltetrahydrofolate synthase(Mthfd1)	ENSMUSG00000021048	108156	NA	NA	-0.900235	NA	NA	GO:0000096~sulfur amino acid metabolic process,GO:0000105~histidine biosynthetic process,GO:0001776~leukocyte homeostasis,GO:0001780~neutrophil homeostasis,GO:0001838~embryonic epithelial tube formation,GO:0001841~neural tube formation,GO:0001843~neural tube closure,GO:0002009~morphogenesis of an epithelium,GO:0002262~myeloid cell homeostasis,GO:0002376~immune system process,GO:0006082~organic ac…	GO:0005576~extracellular region,GO:0005622~intracellular,GO:0005623~cell,GO:0005737~cytoplasm,GO:0005739~mitochondrion,GO:0005829~cytosol,GO:0016020~membrane,GO:0031982~vesicle,GO:0031988~membrane-bounded vesicle,GO:0043226~organelle,GO:0043227~membrane-bounded organelle,GO:0043229~intracellular organelle,GO:0043230~extracellular organelle,GO:0043231~intracellular membrane-bounded organelle,GO:00…	GO:0000166~nucleotide binding,GO:0001882~nucleoside binding,GO:0001883~purine nucleoside binding,GO:0003824~catalytic activity,GO:0004329~formate-tetrahydrofolate ligase activity,GO:0004477~methenyltetrahydrofolate cyclohydrolase activity,GO:0004487~methylenetetrahydrofolate dehydrogenase (NAD+) activity,GO:0004488~methylenetetrahydrofolate dehydrogenase (NADP+) activity,GO:0005488~binding,GO:000…	IPR000559:Formate-tetrahydrofolate ligase, FTHFS,IPR000672:Tetrahydrofolate dehydrogenase/cyclohydrolase,IPR016040:NAD(P)-binding domain,IPR020628:Formate-tetrahydrofolate ligase, FTHFS, conserved site,IPR020630:Tetrahydrofolate dehydrogenase/cyclohydrolase, catalytic domain,IPR020631:Tetrahydrofolate dehydrogenase/cyclohydrolase, NAD(P)-binding domain,IPR020867:Tetrahydrofolate dehydrogenase/cyc…	mmu00670:One carbon pool by folate,mmu01100:Metabolic pathways,	PF00763:Tetrahydrofolate dehydrogenase/cyclohydrolase, catalytic domain,PF01268:Formate--tetrahydrofolate ligase,PF02882:Tetrahydrofolate dehydrogenase/cyclohydrolase, NAD(P)-binding domain,	R-MMU-196757:R-MMU-196757,	Cerebellum,Hippocampus,Liver,Thymus,Whole body,	Acetylation,Amino-acid biosynthesis,ATP-binding,Complete proteome,Cytoplasm,Direct protein sequencing,Histidine biosynthesis,Hydrolase,Ligase,Methionine biosynthesis,Multifunctional enzyme,NADP,Nucleotide-binding,One-carbon metabolism,Oxidoreductase,Phosphoprotein,Purine biosynthesis,Reference proteome,	binding site:NADP,chain:C-1-tetrahydrofolate synthase, cytoplasmic,modified residue,nucleotide phosphate-binding region:ATP,nucleotide phosphate-binding region:NADP,region of interest:Formyltetrahydrofolate synthetase,region of interest:Methylenetetrahydrofolate dehydrogenase and cyclohydrolase,region of interest:Substrate binding,	0	13626:Mthfd1~methylenetetrahydrofolate dehydrogenase (NADP+ dependent), methenyltetrahydrofolate cyclohydrolase, formyltetrahydrofolate synthase,	Coenzyme metabolism,	0	1.5.1.5,3.5.4.9,6.3.4.3,	100043456:predicted gene 10681(Gm10681),101502:hydroxy-delta-5-steroid dehydrogenase, 3 beta- and steroid delta-isomerase 7(Hsd3b7),15364:high mobility group AT-hook 2(Hmga2),15495:hydroxy-delta-5-steroid dehydrogenase, 3 beta- and steroid delta-isomerase 4(Hsd3b4),22627:tyrosine 3-monooxygenase/tryptophan 5-monooxygenase activation protein, epsilon polypeptide(Ywhae),22631:tyrosine 3-monooxygena…	0	NA	NA	Neuron-central	Astrocyte-central
MTHFD1L	methylenetetrahydrofolate dehydrogenase (NADP+ dependent) 1-like(Mthfd1l)	ENSMUSG00000040675	270685	0.550958	0.547159	0.0958233	NA	NA	GO:0001501~skeletal system development,GO:0001838~embryonic epithelial tube formation,GO:0001841~neural tube formation,GO:0001843~neural tube closure,GO:0002009~morphogenesis of an epithelium,GO:0006082~organic acid metabolic process,GO:0006575~cellular modified amino acid metabolic process,GO:0006725~cellular aromatic compound metabolic process,GO:0006730~one-carbon metabolic process,GO:0006732~…	GO:0005622~intracellular,GO:0005623~cell,GO:0005737~cytoplasm,GO:0005739~mitochondrion,GO:0016020~membrane,GO:0043226~organelle,GO:0043227~membrane-bounded organelle,GO:0043229~intracellular organelle,GO:0043231~intracellular membrane-bounded organelle,GO:0044424~intracellular part,GO:0044444~cytoplasmic part,GO:0044464~cell part,	GO:0000166~nucleotide binding,GO:0001882~nucleoside binding,GO:0001883~purine nucleoside binding,GO:0003824~catalytic activity,GO:0004329~formate-tetrahydrofolate ligase activity,GO:0004488~methylenetetrahydrofolate dehydrogenase (NADP+) activity,GO:0005488~binding,GO:0005515~protein binding,GO:0005524~ATP binding,GO:0016491~oxidoreductase activity,GO:0016645~oxidoreductase activity, acting on th…	IPR000559:Formate-tetrahydrofolate ligase, FTHFS,IPR000672:Tetrahydrofolate dehydrogenase/cyclohydrolase,IPR016040:NAD(P)-binding domain,IPR020628:Formate-tetrahydrofolate ligase, FTHFS, conserved site,IPR020630:Tetrahydrofolate dehydrogenase/cyclohydrolase, catalytic domain,IPR020631:Tetrahydrofolate dehydrogenase/cyclohydrolase, NAD(P)-binding domain,IPR027417:P-loop containing nucleoside triph…	mmu00670:One carbon pool by folate,mmu01100:Metabolic pathways,	PF00763:Tetrahydrofolate dehydrogenase/cyclohydrolase, catalytic domain,PF01268:Formate--tetrahydrofolate ligase,PF02882:Tetrahydrofolate dehydrogenase/cyclohydrolase, NAD(P)-binding domain,	R-MMU-196757:R-MMU-196757,	Cerebellum,Hypothalamus,Mammary tumor,	3D-structure,Acetylation,ATP-binding,Complete proteome,Ligase,Mitochondrion,Nucleotide-binding,One-carbon metabolism,Phosphoprotein,Reference proteome,Transit peptide,	chain:Monofunctional C1-tetrahydrofolate synthase, mitochondrial,helix,modified residue,nucleotide phosphate-binding region:ATP,region of interest:Formyltetrahydrofolate synthetase,region of interest:Methylenetetrahydrofolate dehydrogenase and cyclohydrolase,sequence conflict,transit peptide:Mitochondrion,turn,		13626:Mthfd1l~methylenetetrahydrofolate dehydrogenase (NADP+ dependent) 1-like,801:Mthfd1l~methylenetetrahydrofolate dehydrogenase (NADP+ dependent) 1-like,			6.3.4.3,	100043456:predicted gene 10681(Gm10681),101502:hydroxy-delta-5-steroid dehydrogenase, 3 beta- and steroid delta-isomerase 7(Hsd3b7),15495:hydroxy-delta-5-steroid dehydrogenase, 3 beta- and steroid delta-isomerase 4(Hsd3b4),19324:RAB1A, member RAS oncogene family(Rab1a),19331:RAB19, member RAS oncogene family(Rab19),19339:RAB3A, member RAS oncogene family(Rab3a),19342:RAB4B, member RAS oncogene fa…		NA	NA	Neuron-central	Astrocyte-central
mthfd2	methylenetetrahydrofolate dehydrogenase (NAD+ dependent), methenyltetrahydrofolate cyclohydrolase(Mthfd2)	ENSMUSG00000005667	17768	NA	NA	0.582868	NA	-0.00729433	GO:0006575~cellular modified amino acid metabolic process,GO:0006725~cellular aromatic compound metabolic process,GO:0006730~one-carbon metabolic process,GO:0006732~coenzyme metabolic process,GO:0006760~folic acid-containing compound metabolic process,GO:0006807~nitrogen compound metabolic process,GO:0008152~metabolic process,GO:0009058~biosynthetic process,GO:0009108~coenzyme biosynthetic proces…	GO:0005576~extracellular region,GO:0005615~extracellular space,GO:0005622~intracellular,GO:0005623~cell,GO:0005737~cytoplasm,GO:0005739~mitochondrion,GO:0043226~organelle,GO:0043227~membrane-bounded organelle,GO:0043229~intracellular organelle,GO:0043231~intracellular membrane-bounded organelle,GO:0044421~extracellular region part,GO:0044424~intracellular part,GO:0044444~cytoplasmic part,GO:00444…	GO:0000287~magnesium ion binding,GO:0003824~catalytic activity,GO:0004477~methenyltetrahydrofolate cyclohydrolase activity,GO:0004487~methylenetetrahydrofolate dehydrogenase (NAD+) activity,GO:0004488~methylenetetrahydrofolate dehydrogenase (NADP+) activity,GO:0005488~binding,GO:0016491~oxidoreductase activity,GO:0016645~oxidoreductase activity, acting on the CH-NH group of donors,GO:0016646~oxid…	IPR000672:Tetrahydrofolate dehydrogenase/cyclohydrolase,IPR016040:NAD(P)-binding domain,IPR020630:Tetrahydrofolate dehydrogenase/cyclohydrolase, catalytic domain,IPR020631:Tetrahydrofolate dehydrogenase/cyclohydrolase, NAD(P)-binding domain,IPR020867:Tetrahydrofolate dehydrogenase/cyclohydrolase, conserved site,	mmu00670:One carbon pool by folate,mmu01100:Metabolic pathways,	PF00763:Tetrahydrofolate dehydrogenase/cyclohydrolase, catalytic domain,PF02882:Tetrahydrofolate dehydrogenase/cyclohydrolase, NAD(P)-binding domain,	R-MMU-196757:R-MMU-196757,	Bone marrow,Salivary gland,	Acetylation,Complete proteome,Direct protein sequencing,Hydrolase,Magnesium,Mitochondrion,Multifunctional enzyme,NAD,One-carbon metabolism,Oxidoreductase,Proteomics identification,Reference proteome,Signal,Transit peptide,	chain:Bifunctional methylenetetrahydrofolate dehydrogenase/cyclohydrolase, mitochondrial,modified residue,transit peptide:Mitochondrion,	0	0	Coenzyme metabolism,	0	1.5.1.15,3.5.4.9,	0	0	NA	NA	Neuron-central	Astrocyte-central
mthfd2l	methylenetetrahydrofolate dehydrogenase (NADP+ dependent) 2-like(Mthfd2l)	ENSMUSG00000029376	665563	NA	NA	NA	NA	-0.00777664	GO:0000105~histidine biosynthetic process,GO:0006082~organic acid metabolic process,GO:0006139~nucleobase-containing compound metabolic process,GO:0006163~purine nucleotide metabolic process,GO:0006164~purine nucleotide biosynthetic process,GO:0006520~cellular amino acid metabolic process,GO:0006547~histidine metabolic process,GO:0006555~methionine metabolic process,GO:0006575~cellular modified a…	GO:0005622~intracellular,GO:0005623~cell,GO:0005737~cytoplasm,GO:0005739~mitochondrion,GO:0005740~mitochondrial envelope,GO:0005743~mitochondrial inner membrane,GO:0005759~mitochondrial matrix,GO:0016020~membrane,GO:0019866~organelle inner membrane,GO:0031090~organelle membrane,GO:0031966~mitochondrial membrane,GO:0031967~organelle envelope,GO:0031974~membrane-enclosed lumen,GO:0031975~envelope,G…	GO:0003824~catalytic activity,GO:0004477~methenyltetrahydrofolate cyclohydrolase activity,GO:0004487~methylenetetrahydrofolate dehydrogenase (NAD+) activity,GO:0004488~methylenetetrahydrofolate dehydrogenase (NADP+) activity,GO:0016491~oxidoreductase activity,GO:0016645~oxidoreductase activity, acting on the CH-NH group of donors,GO:0016646~oxidoreductase activity, acting on the CH-NH group of do…	IPR000672:Tetrahydrofolate dehydrogenase/cyclohydrolase,IPR016040:NAD(P)-binding domain,IPR020630:Tetrahydrofolate dehydrogenase/cyclohydrolase, catalytic domain,IPR020631:Tetrahydrofolate dehydrogenase/cyclohydrolase, NAD(P)-binding domain,IPR020867:Tetrahydrofolate dehydrogenase/cyclohydrolase, conserved site,	mmu00670:One carbon pool by folate,mmu01100:Metabolic pathways,	PF00763:Tetrahydrofolate dehydrogenase/cyclohydrolase, catalytic domain,PF02882:Tetrahydrofolate dehydrogenase/cyclohydrolase, NAD(P)-binding domain,	R-MMU-196757:R-MMU-196757,	0	Amino-acid biosynthesis,Complete proteome,Histidine biosynthesis,Hydrolase,Magnesium,Membrane,Methionine biosynthesis,Mitochondrion,Mitochondrion inner membrane,Multifunctional enzyme,NAD,One-carbon metabolism,Oxidoreductase,Purine biosynthesis,Reference proteome,	0	0	0	Coenzyme metabolism,	0	1.5.1.15,3.5.4.9,	0	0	NA	NA	Neuron-central	Astrocyte-central
NMNAT2	nicotinamide nucleotide adenylyltransferase 2(Nmnat2)	ENSMUSG00000042751	226518	NA	0.915305	1.31156	NA	-0.0177644	GO:0006082~organic acid metabolic process,GO:0006139~nucleobase-containing compound metabolic process,GO:0006520~cellular amino acid metabolic process,GO:0006531~aspartate metabolic process,GO:0006725~cellular aromatic compound metabolic process,GO:0006732~coenzyme metabolic process,GO:0006733~oxidoreduction coenzyme metabolic process,GO:0006753~nucleoside phosphate metabolic process,GO:0006793~p…	GO:0005622~intracellular,GO:0005623~cell,GO:0005737~cytoplasm,GO:0005768~endosome,GO:0005770~late endosome,GO:0005773~vacuole,GO:0005794~Golgi apparatus,GO:0005802~trans-Golgi network,GO:0012505~endomembrane system,GO:0031984~organelle subcompartment,GO:0043226~organelle,GO:0043227~membrane-bounded organelle,GO:0043229~intracellular organelle,GO:0043231~intracellular membrane-bounded organelle,GO…	GO:0000166~nucleotide binding,GO:0000309~nicotinamide-nucleotide adenylyltransferase activity,GO:0001882~nucleoside binding,GO:0001883~purine nucleoside binding,GO:0003824~catalytic activity,GO:0004515~nicotinate-nucleotide adenylyltransferase activity,GO:0005488~binding,GO:0005524~ATP binding,GO:0016740~transferase activity,GO:0016772~transferase activity, transferring phosphorus-containing grou…	IPR004821:Cytidyltransferase-like domain,IPR005248:Probable nicotinate-nucleotide adenylyltransferase,IPR014729:Rossmann-like alpha/beta/alpha sandwich fold,	mmu00760:Nicotinate and nicotinamide metabolism,mmu01100:Metabolic pathways,	PF01467:Cytidylyltransferase,	R-MMU-196807:R-MMU-196807,	Brain,	ATP-binding,Complete proteome,Cytoplasm,Golgi apparatus,NAD,Nucleotide-binding,Nucleotidyltransferase,Proteomics identification,Pyridine nucleotide biosynthesis,Reference proteome,Transferase,	binding site:Substrate,chain:Nicotinamide mononucleotide adenylyltransferase 2,nucleotide phosphate-binding region:ATP,					2.7.7.1,2.7.7.18,			NA	NA	NA	Astrocyte-central
NNT	nicotinamide nucleotide transhydrogenase(Nnt)	ENSMUSG00000025453	18115	NA	NA	-0.416138	NA	NA	GO:0006139~nucleobase-containing compound metabolic process,GO:0006725~cellular aromatic compound metabolic process,GO:0006732~coenzyme metabolic process,GO:0006733~oxidoreduction coenzyme metabolic process,GO:0006739~NADP metabolic process,GO:0006740~NADPH regeneration,GO:0006753~nucleoside phosphate metabolic process,GO:0006793~phosphorus metabolic process,GO:0006796~phosphate-containing compou…	GO:0005622~intracellular,GO:0005623~cell,GO:0005737~cytoplasm,GO:0005739~mitochondrion,GO:0005740~mitochondrial envelope,GO:0005743~mitochondrial inner membrane,GO:0016020~membrane,GO:0016021~integral component of membrane,GO:0019866~organelle inner membrane,GO:0031090~organelle membrane,GO:0031224~intrinsic component of membrane,GO:0031966~mitochondrial membrane,GO:0031967~organelle envelope,GO:…	GO:0000166~nucleotide binding,GO:0003824~catalytic activity,GO:0005488~binding,GO:0008746~NAD(P)+ transhydrogenase activity,GO:0008750~NAD(P)+ transhydrogenase (AB-specific) activity,GO:0016491~oxidoreductase activity,GO:0016651~oxidoreductase activity, acting on NAD(P)H,GO:0016652~oxidoreductase activity, acting on NAD(P)H, NAD(P) as acceptor,GO:0036094~small molecule binding,GO:0048037~cofactor…	IPR007698:Alanine dehydrogenase/PNT, NAD(H)-binding domain,IPR007886:Alanine dehydrogenase/pyridine nucleotide transhydrogenase, N-terminal,IPR008142:Alanine dehydrogenase/pyridine nucleotide transhydrogenase, conserved site-1,IPR008143:Alanine dehydrogenase/pyridine nucleotide transhydrogenase, conserved site-2,IPR012136:NADP transhydrogenase, beta subunit,IPR016040:NAD(P)-binding domain,IPR0246…	mmu00760:Nicotinate and nicotinamide metabolism,mmu01100:Metabolic pathways,	PF01262:Alanine dehydrogenase/PNT, C-terminal domain,PF02233:NAD(P) transhydrogenase beta subunit,PF05222:Alanine dehydrogenase/PNT, N-terminal domain,PF12769:Domain of unknown function (DUF3814),	R-MMU-71403:R-MMU-71403,	Bladder,Brain,Heart,Liver,Lung,Mammary tumor. Metallothionien-TGF alpha model. 10 month old virgin mouse. Taken by biopsy.,Ovary,Testis,Thymus,	Acetylation,Complete proteome,Direct protein sequencing,Membrane,Mitochondrion,Mitochondrion inner membrane,NAD,NADP,Oxidoreductase,Proteomics identification,Reference proteome,Transit peptide,Transmembrane,Transmembrane helix,	chain:NAD(P) transhydrogenase, mitochondrial,modified residue,nucleotide phosphate-binding region:NAD,sequence conflict,topological domain:Cytoplasmic,topological domain:Mitochondrial matrix,transit peptide:Mitochondrion,transmembrane region,					1.6.1.2,	100043456:predicted gene 10681(Gm10681),101502:hydroxy-delta-5-steroid dehydrogenase, 3 beta- and steroid delta-isomerase 7(Hsd3b7),15495:hydroxy-delta-5-steroid dehydrogenase, 3 beta- and steroid delta-isomerase 4(Hsd3b4),22627:tyrosine 3-monooxygenase/tryptophan 5-monooxygenase activation protein, epsilon polypeptide(Ywhae),22631:tyrosine 3-monooxygenase/tryptophan 5-monooxygenase activation pr…		Neuron-optimal	NA	Neuron-central	Astrocyte-central
NUDT5	nudix (nucleoside diphosphate linked moiety X)-type motif 5(Nudt5)	ENSMUSG00000025817	53893	NA	NA	-0.509804	NA	NA	GO:0005975~carbohydrate metabolic process,GO:0005996~monosaccharide metabolic process,GO:0006014~D-ribose metabolic process,GO:0006139~nucleobase-containing compound metabolic process,GO:0006163~purine nucleotide metabolic process,GO:0006325~chromatin organization,GO:0006338~chromatin remodeling,GO:0006725~cellular aromatic compound metabolic process,GO:0006753~nucleoside phosphate metabolic proc…	GO:0005576~extracellular region,GO:0005622~intracellular,GO:0005623~cell,GO:0005634~nucleus,GO:0031982~vesicle,GO:0031988~membrane-bounded vesicle,GO:0043226~organelle,GO:0043227~membrane-bounded organelle,GO:0043229~intracellular organelle,GO:0043230~extracellular organelle,GO:0043231~intracellular membrane-bounded organelle,GO:0044421~extracellular region part,GO:0044424~intracellular part,GO:0…	GO:0000287~magnesium ion binding,GO:0003676~nucleic acid binding,GO:0003723~RNA binding,GO:0003824~catalytic activity,GO:0005488~binding,GO:0005515~protein binding,GO:0016462~pyrophosphatase activity,GO:0016740~transferase activity,GO:0016772~transferase activity, transferring phosphorus-containing groups,GO:0016779~nucleotidyltransferase activity,GO:0016787~hydrolase activity,GO:0016817~hydrolas…	IPR000086:NUDIX hydrolase domain,IPR015797:NUDIX hydrolase domain-like,IPR020084:NUDIX hydrolase, conserved site,IPR020476:NUDIX hydrolase,	mmu00230:Purine metabolism,	PF00293:NUDIX domain,	R-MMU-2393930:R-MMU-2393930,	Hippocampus,Liver,Testis,Thymus,	Acetylation,Complete proteome,Direct protein sequencing,Hydrolase,Magnesium,Metal-binding,Nucleus,Phosphoprotein,Proteomics identification,Reference proteome,RNA-binding,Transferase,	chain:ADP-sugar pyrophosphatase,domain:Nudix hydrolase,modified residue,sequence conflict,short sequence motif:Nudix box,	0	20371:Nudt5~nudix (nucleoside diphosphate linked moiety X)-type motif 5,	0	0	2.7.7.-,3.6.1.13,3.6.1.58,	15364:high mobility group AT-hook 2(Hmga2),22627:tyrosine 3-monooxygenase/tryptophan 5-monooxygenase activation protein, epsilon polypeptide(Ywhae),	0	NA	Astrocyte-optimal	Neuron-central	Astrocyte-central
NUDT9	nudix (nucleoside diphosphate linked moiety X)-type motif 9(Nudt9)	ENSMUSG00000029310	74167	NA	NA	-0.0117371	NA	NA	GO:0006139~nucleobase-containing compound metabolic process,GO:0006152~purine nucleoside catabolic process,GO:0006163~purine nucleotide metabolic process,GO:0006195~purine nucleotide catabolic process,GO:0006725~cellular aromatic compound metabolic process,GO:0006753~nucleoside phosphate metabolic process,GO:0006793~phosphorus metabolic process,GO:0006796~phosphate-containing compound metabolic p…	GO:0005576~extracellular region,GO:0005622~intracellular,GO:0005623~cell,GO:0005737~cytoplasm,GO:0005739~mitochondrion,GO:0031982~vesicle,GO:0031988~membrane-bounded vesicle,GO:0043226~organelle,GO:0043227~membrane-bounded organelle,GO:0043229~intracellular organelle,GO:0043230~extracellular organelle,GO:0043231~intracellular membrane-bounded organelle,GO:0044421~extracellular region part,GO:0044…	GO:0003824~catalytic activity,GO:0016462~pyrophosphatase activity,GO:0016787~hydrolase activity,GO:0016817~hydrolase activity, acting on acid anhydrides,GO:0016818~hydrolase activity, acting on acid anhydrides, in phosphorus-containing anhydrides,GO:0017110~nucleoside-diphosphatase activity,GO:0043262~adenosine-diphosphatase activity,GO:0047631~ADP-ribose diphosphatase activity,	IPR000086:NUDIX hydrolase domain,IPR015797:NUDIX hydrolase domain-like,	mmu00230:Purine metabolism,	PF00293:NUDIX domain,	R-MMU-2393930:R-MMU-2393930,	Head,Inner ear,Mammary tumor,	Coiled coil,Complete proteome,Hydrolase,Magnesium,Manganese,Mitochondrion,Phosphoprotein,Proteomics identification,Reference proteome,Transit peptide,	chain:ADP-ribose pyrophosphatase, mitochondrial,domain:Nudix hydrolase,modified residue,sequence conflict,short sequence motif:Nudix box,transit peptide:Mitochondrion,					3.6.1.13,			NA	Astrocyte-optimal	Neuron-central	Astrocyte-central
OXCT1	3-oxoacid CoA transferase 1(Oxct1)	ENSMUSG00000022186	67041	NA	NA	0.392306	-0.0178241	-0.020087	GO:0001678~cellular glucose homeostasis,GO:0002790~peptide secretion,GO:0002791~regulation of peptide secretion,GO:0002793~positive regulation of peptide secretion,GO:0006810~transport,GO:0006950~response to stress,GO:0007154~cell communication,GO:0007267~cell-cell signaling,GO:0007275~multicellular organism development,GO:0007399~nervous system development,GO:0007417~central nervous system devel…	GO:0005622~intracellular,GO:0005623~cell,GO:0005737~cytoplasm,GO:0005739~mitochondrion,GO:0005759~mitochondrial matrix,GO:0031974~membrane-enclosed lumen,GO:0043226~organelle,GO:0043227~membrane-bounded organelle,GO:0043229~intracellular organelle,GO:0043231~intracellular membrane-bounded organelle,GO:0043233~organelle lumen,GO:0044422~organelle part,GO:0044424~intracellular part,GO:0044429~mitoc…	GO:0003824~catalytic activity,GO:0005488~binding,GO:0005515~protein binding,GO:0008260~3-oxoacid CoA-transferase activity,GO:0008410~CoA-transferase activity,GO:0016740~transferase activity,GO:0016782~transferase activity, transferring sulfur-containing groups,GO:0042802~identical protein binding,GO:0042803~protein homodimerization activity,GO:0046983~protein dimerization activity,	IPR004163:Coenzyme A transferase binding site,IPR004164:Coenzyme A transferase active site,IPR004165:Coenzyme A transferase family I,IPR012791:3-oxoacid CoA-transferase, subunit B,IPR012792:3-oxoacid CoA-transferase, subunit A,IPR014388:3-oxoacid CoA-transferase,	mmu00072:Synthesis and degradation of ketone bodies,mmu00280:Valine, leucine and isoleucine degradation,mmu00650:Butanoate metabolism,	PF01144:Coenzyme A transferase,	R-MMU-77108:R-MMU-77108,	Bone marrow,Brain,Embryo,Hippocampus,Tongue,	Complete proteome,Direct protein sequencing,Mitochondrion,Phosphoprotein,Proteomics identification,Reference proteome,Transferase,Transit peptide,	chain:Succinyl-CoA:3-ketoacid-coenzyme A transferase 1, mitochondrial,region of interest:CoA-binding,sequence conflict,transit peptide:Mitochondrion,	0	0	Lipid metabolism,	0	2.8.3.5,	100043456:predicted gene 10681(Gm10681),13385:discs, large homolog 4 (Drosophila)(Dlg4),15495:hydroxy-delta-5-steroid dehydrogenase, 3 beta- and steroid delta-isomerase 4(Hsd3b4),19085:protein kinase, cAMP dependent regulatory, type I beta(Prkar1b),22627:tyrosine 3-monooxygenase/tryptophan 5-monooxygenase activation protein, epsilon polypeptide(Ywhae),22631:tyrosine 3-monooxygenase/tryptophan 5-m…	19085:protein kinase, cAMP dependent regulatory, type I beta(Prkar1b),	Neuron-optimal	NA	NA	NA
PANK1	pantothenate kinase 1(Pank1)	ENSMUSG00000033610	75735	NA	NA	0.933326	NA	-0.016576	GO:0006139~nucleobase-containing compound metabolic process,GO:0006163~purine nucleotide metabolic process,GO:0006164~purine nucleotide biosynthetic process,GO:0006725~cellular aromatic compound metabolic process,GO:0006732~coenzyme metabolic process,GO:0006753~nucleoside phosphate metabolic process,GO:0006793~phosphorus metabolic process,GO:0006796~phosphate-containing compound metabolic process…	GO:0005622~intracellular,GO:0005623~cell,GO:0005634~nucleus,GO:0005737~cytoplasm,GO:0005768~endosome,GO:0005773~vacuole,GO:0005829~cytosol,GO:0012505~endomembrane system,GO:0016020~membrane,GO:0030117~membrane coat,GO:0030118~clathrin coat,GO:0032991~macromolecular complex,GO:0043226~organelle,GO:0043227~membrane-bounded organelle,GO:0043229~intracellular organelle,GO:0043231~intracellular membra…	GO:0000166~nucleotide binding,GO:0001882~nucleoside binding,GO:0001883~purine nucleoside binding,GO:0003824~catalytic activity,GO:0004594~pantothenate kinase activity,GO:0005488~binding,GO:0005524~ATP binding,GO:0016301~kinase activity,GO:0016740~transferase activity,GO:0016772~transferase activity, transferring phosphorus-containing groups,GO:0016773~phosphotransferase activity, alcohol group as…	IPR004567:Type II pantothenate kinase,	mmu00770:Pantothenate and CoA biosynthesis,mmu01100:Metabolic pathways,	PF03630:Fumble ,	R-MMU-196783:R-MMU-196783,	Head,Liver,Skeletal muscle,Skin,Whole body,	Alternative splicing,ATP-binding,Coenzyme A biosynthesis,Complete proteome,Kinase,Nucleotide-binding,Phosphoprotein,Reference proteome,Transferase,	chain:Pantothenate kinase 1,splice variant,	0	0	0	0	2.7.1.33,	0	0	NA	NA	Neuron-central	Astrocyte-central
PANK3	pantothenate kinase 3(Pank3)	ENSMUSG00000018846	211347	NA	NA	-0.0609107	NA	-0.00645824	GO:0006139~nucleobase-containing compound metabolic process,GO:0006163~purine nucleotide metabolic process,GO:0006164~purine nucleotide biosynthetic process,GO:0006725~cellular aromatic compound metabolic process,GO:0006732~coenzyme metabolic process,GO:0006753~nucleoside phosphate metabolic process,GO:0006793~phosphorus metabolic process,GO:0006796~phosphate-containing compound metabolic process…	GO:0005622~intracellular,GO:0005623~cell,GO:0005737~cytoplasm,GO:0044424~intracellular part,GO:0044464~cell part,	GO:0000166~nucleotide binding,GO:0001882~nucleoside binding,GO:0001883~purine nucleoside binding,GO:0003824~catalytic activity,GO:0004594~pantothenate kinase activity,GO:0005488~binding,GO:0005524~ATP binding,GO:0016301~kinase activity,GO:0016740~transferase activity,GO:0016772~transferase activity, transferring phosphorus-containing groups,GO:0016773~phosphotransferase activity, alcohol group as…	IPR004567:Type II pantothenate kinase,	mmu00770:Pantothenate and CoA biosynthesis,mmu01100:Metabolic pathways,	PF03630:Fumble ,		Egg,Mammary gland,Testis,Thymus,	ATP-binding,Coenzyme A biosynthesis,Complete proteome,Cytoplasm,Kinase,Nucleotide-binding,Reference proteome,Transferase,	chain:Pantothenate kinase 3,					2.7.1.33,			NA	NA	Neuron-central	Astrocyte-central
PANK4	pantothenate kinase 4(Pank4)	ENSMUSG00000029056	269614	NA	NA	-0.873656	NA	NA	GO:0006139~nucleobase-containing compound metabolic process,GO:0006163~purine nucleotide metabolic process,GO:0006164~purine nucleotide biosynthetic process,GO:0006725~cellular aromatic compound metabolic process,GO:0006732~coenzyme metabolic process,GO:0006753~nucleoside phosphate metabolic process,GO:0006793~phosphorus metabolic process,GO:0006796~phosphate-containing compound metabolic process…	GO:0005622~intracellular,GO:0005623~cell,GO:0005737~cytoplasm,GO:0044424~intracellular part,GO:0044464~cell part,	GO:0000166~nucleotide binding,GO:0001882~nucleoside binding,GO:0001883~purine nucleoside binding,GO:0003824~catalytic activity,GO:0004594~pantothenate kinase activity,GO:0005488~binding,GO:0005524~ATP binding,GO:0016301~kinase activity,GO:0016740~transferase activity,GO:0016772~transferase activity, transferring phosphorus-containing groups,GO:0016773~phosphotransferase activity, alcohol group as…	IPR002791:Domain of unknown function DUF89,IPR004567:Type II pantothenate kinase,IPR015844:Pantothenate kinase, acetyl-CoA regulated, two-domain type,	mmu00770:Pantothenate and CoA biosynthesis,mmu01100:Metabolic pathways,	PF01937:Protein of unknown function DUF89,PF03630:Fumble ,	0	Brain,Embryo,Mammary tumor. WAP-TGF alpha model. 7 months old,	Acetylation,Alternative splicing,ATP-binding,Coenzyme A biosynthesis,Complete proteome,Cytoplasm,Kinase,Nitration,Nucleotide-binding,Phosphoprotein,Proteomics identification,Reference proteome,Transferase,	chain:Pantothenate kinase 4,modified residue,sequence conflict,splice variant,	0	10376:TUBA1B~tubulin alpha 1b,3326:HSP90AB1~heat shock protein 90 alpha family class B member 1,3939:LDHA~lactate dehydrogenase A,3945:LDHB~lactate dehydrogenase B,4605:MYBL2~MYB proto-oncogene like 2,55746:NUP133~nucleoporin 133,79571:GCC1~GRIP and coiled-coil domain containing 1,	0	0	2.7.1.33,	22627:tyrosine 3-monooxygenase/tryptophan 5-monooxygenase activation protein, epsilon polypeptide(Ywhae),	0	NA	NA	Neuron-central	Astrocyte-central
Pcx	pyruvate carboxylase(Pcx)	ENSMUSG00000024892	18563	NA	-0.538149	0.0684818	NA	NA	GO:0005975~carbohydrate metabolic process,GO:0005996~monosaccharide metabolic process,GO:0006006~glucose metabolic process,GO:0006082~organic acid metabolic process,GO:0006090~pyruvate metabolic process,GO:0006094~gluconeogenesis,GO:0006107~oxaloacetate metabolic process,GO:0006629~lipid metabolic process,GO:0006644~phospholipid metabolic process,GO:0006793~phosphorus metabolic process,GO:0006796…	GO:0005622~intracellular,GO:0005623~cell,GO:0005737~cytoplasm,GO:0005739~mitochondrion,GO:0005740~mitochondrial envelope,GO:0005743~mitochondrial inner membrane,GO:0005759~mitochondrial matrix,GO:0016020~membrane,GO:0019866~organelle inner membrane,GO:0031090~organelle membrane,GO:0031966~mitochondrial membrane,GO:0031967~organelle envelope,GO:0031974~membrane-enclosed lumen,GO:0031975~envelope,G…	GO:0000166~nucleotide binding,GO:0001882~nucleoside binding,GO:0001883~purine nucleoside binding,GO:0003676~nucleic acid binding,GO:0003677~DNA binding,GO:0003824~catalytic activity,GO:0004075~biotin carboxylase activity,GO:0004736~pyruvate carboxylase activity,GO:0005488~binding,GO:0005524~ATP binding,GO:0009374~biotin binding,GO:0016874~ligase activity,GO:0016879~ligase activity, forming carbon…	IPR000089:Biotin/lipoyl attachment,IPR000891:Pyruvate carboxyltransferase,IPR001882:Biotin-binding site,IPR003379:Carboxylase, conserved domain,IPR005479:Carbamoyl-phosphate synthetase large subunit-like, ATP-binding domain,IPR005481:Carbamoyl-phosphate synthase, large subunit, N-terminal,IPR005482:Biotin carboxylase, C-terminal,IPR005930:Pyruvate carboxylase,IPR009057:Homeodomain-like,IPR011053:…	mmu00020:Citrate cycle (TCA cycle),mmu00620:Pyruvate metabolism,mmu01100:Metabolic pathways,mmu01200:Carbon metabolism,mmu01230:Biosynthesis of amino acids,	PF00289:Carbamoyl-phosphate synthase L chain, N-terminal domain,PF00364:Biotin-requiring enzyme,PF00682:HMGL-like,PF02436:Conserved carboxylase domain,PF02785:Biotin carboxylase C-terminal domain,PF02786:Carbamoyl-phosphate synthase L chain, ATP binding domain,	R-MMU-196780:R-MMU-196780,R-MMU-70263:R-MMU-70263,	Activated spleen,Adipocyte,Liver,Whole body,	Acetylation,ATP-binding,Biotin,Complete proteome,Gluconeogenesis,Ligase,Lipid biosynthesis,Lipid metabolism,Manganese,Metal-binding,Mitochondrion,Multifunctional enzyme,Nucleotide-binding,Phosphoprotein,Proteomics identification,Pyruvate,Reference proteome,Transit peptide,	binding site:ATP,binding site:Substrate,chain:Pyruvate carboxylase, mitochondrial,domain:ATP-grasp,domain:Biotin carboxylation,domain:Biotinyl-binding,domain:Carboxyltransferase,metal ion-binding site:Manganese,metal ion-binding site:Manganese; via carbamate group,modified residue,region of interest:Substrate binding,transit peptide:Mitochondrion,	m_malatexPathway:Shuttle for transfer of acetyl groups from mitochondria to the cytosol,	20371:Pcx~pyruvate carboxylase,			6.4.1.1,	100043456:predicted gene 10681(Gm10681),101502:hydroxy-delta-5-steroid dehydrogenase, 3 beta- and steroid delta-isomerase 7(Hsd3b7),14056:enhancer of zeste 2 polycomb repressive complex 2 subunit(Ezh2),15495:hydroxy-delta-5-steroid dehydrogenase, 3 beta- and steroid delta-isomerase 4(Hsd3b4),19345:RAB5C, member RAS oncogene family(Rab5c),22627:tyrosine 3-monooxygenase/tryptophan 5-monooxygenase a…		NA	Astrocyte-optimal	NA	Astrocyte-central
pcyt2	phosphate cytidylyltransferase 2, ethanolamine(Pcyt2)	ENSMUSG00000025137	68671	NA	NA	NA	NA	0.00527662	GO:0006629~lipid metabolic process,GO:0006644~phospholipid metabolic process,GO:0006646~phosphatidylethanolamine biosynthetic process,GO:0006650~glycerophospholipid metabolic process,GO:0006793~phosphorus metabolic process,GO:0006796~phosphate-containing compound metabolic process,GO:0008152~metabolic process,GO:0008610~lipid biosynthetic process,GO:0008654~phospholipid biosynthetic process,GO:00…	0	GO:0003824~catalytic activity,GO:0004306~ethanolamine-phosphate cytidylyltransferase activity,GO:0016740~transferase activity,GO:0016772~transferase activity, transferring phosphorus-containing groups,GO:0016779~nucleotidyltransferase activity,GO:0070567~cytidylyltransferase activity,	IPR004821:Cytidyltransferase-like domain,IPR014729:Rossmann-like alpha/beta/alpha sandwich fold,	mmu00564:Glycerophospholipid metabolism,mmu01100:Metabolic pathways,	PF01467:Cytidylyltransferase,	R-MMU-1483213:R-MMU-1483213,	Mammary gland,Medulla oblongata,Whole body,	Complete proteome,Lipid biosynthesis,Lipid metabolism,Nucleotidyltransferase,Phospholipid biosynthesis,Phospholipid metabolism,Phosphoprotein,Proteomics identification,Reference proteome,Transferase,	chain:Ethanolamine-phosphate cytidylyltransferase,region of interest:Catalytic 1,region of interest:Catalytic 2,sequence conflict,	0	0	0	0	2.7.7.14,	22627:tyrosine 3-monooxygenase/tryptophan 5-monooxygenase activation protein, epsilon polypeptide(Ywhae),66171:6-phosphogluconolactonase(Pgls),	0	NA	NA	Neuron-central	Astrocyte-central
PDHA1	pyruvate dehydrogenase E1 alpha 1(Pdha1)	ENSMUSG00000031299	18597	NA	NA	0.497498	NA	-0.0385524	GO:0005975~carbohydrate metabolic process,GO:0005996~monosaccharide metabolic process,GO:0006006~glucose metabolic process,GO:0006082~organic acid metabolic process,GO:0006084~acetyl-CoA metabolic process,GO:0006085~acetyl-CoA biosynthetic process,GO:0006086~acetyl-CoA biosynthetic process from pyruvate,GO:0006090~pyruvate metabolic process,GO:0006091~generation of precursor metabolites and energ…	GO:0005622~intracellular,GO:0005623~cell,GO:0005634~nucleus,GO:0005737~cytoplasm,GO:0005739~mitochondrion,GO:0005759~mitochondrial matrix,GO:0031974~membrane-enclosed lumen,GO:0032991~macromolecular complex,GO:0043209~myelin sheath,GO:0043226~organelle,GO:0043227~membrane-bounded organelle,GO:0043229~intracellular organelle,GO:0043231~intracellular membrane-bounded organelle,GO:0043233~organelle …	GO:0003824~catalytic activity,GO:0004738~pyruvate dehydrogenase activity,GO:0004739~pyruvate dehydrogenase (acetyl-transferring) activity,GO:0016491~oxidoreductase activity,GO:0016620~oxidoreductase activity, acting on the aldehyde or oxo group of donors, NAD or NADP as acceptor,GO:0016624~oxidoreductase activity, acting on the aldehyde or oxo group of donors, disulfide as acceptor,GO:0016903~oxi…	IPR001017:Dehydrogenase, E1 component,IPR017597:Pyruvate dehydrogenase (acetyl-transferring) E1 component, alpha subunit, subgroup y,	mmu00010:Glycolysis / Gluconeogenesis,mmu00020:Citrate cycle (TCA cycle),mmu00620:Pyruvate metabolism,mmu01100:Metabolic pathways,mmu01130:Biosynthesis of antibiotics,mmu01200:Carbon metabolism,mmu04066:HIF-1 signaling pathway,mmu04922:Glucagon signaling pathway,mmu05230:Central carbon metabolism in cancer,	PF00676:Dehydrogenase E1 component,	R-MMU-204174:R-MMU-204174,R-MMU-389661:R-MMU-389661,R-MMU-5362517:R-MMU-5362517,R-MMU-70268:R-MMU-70268,	Brain,Heart,Hippocampus,Liver,Mammary gland,Pancreas,	Acetylation,Carbohydrate metabolism,Complete proteome,Direct protein sequencing,Glucose metabolism,Mitochondrion,Oxidoreductase,Phosphoprotein,Pyruvate,Reference proteome,Thiamine pyrophosphate,Transit peptide,Tricarboxylic acid cycle,	chain:Pyruvate dehydrogenase E1 component subunit alpha, somatic form, mitochondrial,modified residue,transit peptide:Mitochondrion,	m_malatexPathway:Shuttle for transfer of acetyl groups from mitochondria to the cytosol,	3028:Pdha1~pyruvate dehydrogenase E1 alpha 1,	Energy production and conversion,	0	1.2.4.1,	100043456:predicted gene 10681(Gm10681),13385:discs, large homolog 4 (Drosophila)(Dlg4),14056:enhancer of zeste 2 polycomb repressive complex 2 subunit(Ezh2),15495:hydroxy-delta-5-steroid dehydrogenase, 3 beta- and steroid delta-isomerase 4(Hsd3b4),22627:tyrosine 3-monooxygenase/tryptophan 5-monooxygenase activation protein, epsilon polypeptide(Ywhae),22631:tyrosine 3-monooxygenase/tryptophan 5-m…	0	Neuron-optimal	NA	NA	NA
pdhb	pyruvate dehydrogenase (lipoamide) beta(Pdhb)	ENSMUSG00000021748	68263	NA	NA	NA	NA	-0.0215654	GO:0005975~carbohydrate metabolic process,GO:0005996~monosaccharide metabolic process,GO:0006006~glucose metabolic process,GO:0006082~organic acid metabolic process,GO:0006084~acetyl-CoA metabolic process,GO:0006085~acetyl-CoA biosynthetic process,GO:0006086~acetyl-CoA biosynthetic process from pyruvate,GO:0006090~pyruvate metabolic process,GO:0006091~generation of precursor metabolites and energ…	GO:0005576~extracellular region,GO:0005622~intracellular,GO:0005623~cell,GO:0005634~nucleus,GO:0005654~nucleoplasm,GO:0005737~cytoplasm,GO:0005739~mitochondrion,GO:0005759~mitochondrial matrix,GO:0031974~membrane-enclosed lumen,GO:0031981~nuclear lumen,GO:0031982~vesicle,GO:0031988~membrane-bounded vesicle,GO:0032991~macromolecular complex,GO:0043226~organelle,GO:0043227~membrane-bounded organell…	GO:0003824~catalytic activity,GO:0004738~pyruvate dehydrogenase activity,GO:0004739~pyruvate dehydrogenase (acetyl-transferring) activity,GO:0016491~oxidoreductase activity,GO:0016620~oxidoreductase activity, acting on the aldehyde or oxo group of donors, NAD or NADP as acceptor,GO:0016624~oxidoreductase activity, acting on the aldehyde or oxo group of donors, disulfide as acceptor,GO:0016903~oxi…	IPR005475:Transketolase-like, pyrimidine-binding domain,IPR009014:Transketolase, C-terminal/Pyruvate-ferredoxin oxidoreductase, domain II,IPR027110:Pyruvate dehydrogenase E1 component subunit beta,	mmu00010:Glycolysis / Gluconeogenesis,mmu00020:Citrate cycle (TCA cycle),mmu00620:Pyruvate metabolism,mmu01100:Metabolic pathways,mmu01130:Biosynthesis of antibiotics,mmu01200:Carbon metabolism,mmu04066:HIF-1 signaling pathway,mmu04922:Glucagon signaling pathway,mmu05230:Central carbon metabolism in cancer,	PF02779:Transketolase, pyrimidine binding domain,PF02780:Transketolase, C-terminal domain,	R-MMU-204174:R-MMU-204174,R-MMU-389661:R-MMU-389661,R-MMU-5362517:R-MMU-5362517,R-MMU-70268:R-MMU-70268,	Bone marrow,Brain,Embryo,Hippocampus,Liver,Mammary tumor,	Acetylation,Carbohydrate metabolism,Complete proteome,Direct protein sequencing,Glucose metabolism,Mitochondrion,Oxidoreductase,Phosphoprotein,Pyruvate,Reference proteome,Thiamine pyrophosphate,Transit peptide,Tricarboxylic acid cycle,	binding site:Thiamine pyrophosphate,chain:Pyruvate dehydrogenase E1 component subunit beta, mitochondrial,modified residue,sequence conflict,transit peptide:Mitochondrion,	0	16531:Pdhb~pyruvate dehydrogenase (lipoamide) beta,22631:Pdhb~pyruvate dehydrogenase (lipoamide) beta,3028:PDHB~pyruvate dehydrogenase (lipoamide) beta,71950:Pdhb~pyruvate dehydrogenase (lipoamide) beta,	0	0	1.2.4.1,	100043456:predicted gene 10681(Gm10681),13385:discs, large homolog 4 (Drosophila)(Dlg4),14056:enhancer of zeste 2 polycomb repressive complex 2 subunit(Ezh2),15495:hydroxy-delta-5-steroid dehydrogenase, 3 beta- and steroid delta-isomerase 4(Hsd3b4),16531:potassium large conductance calcium-activated channel, subfamily M, alpha member 1(Kcnma1),18754:protein kinase C, epsilon(Prkce),22627:tyrosine…	100041194:AHNAK nucleoprotein 2(Ahnak2),100043813:ribosomal protein S27, retrogene(Rps27rt),100043876:predicted gene 4705(Gm4705),100609:NOL1/NOP2/Sun domain family, member 5(Nsun5),100678:phosphoserine phosphatase(Psph),100763:ubiquitin protein ligase E3C(Ube3c),100862468:NHP2-like protein 1(LOC100862468),101314:BRICK1, SCAR/WAVE actin-nucleating complex subunit(Brk1),102595:pleckstrin homology …	Neuron-optimal	NA	NA	NA
PDHX	pyruvate dehydrogenase complex, component X(Pdhx)	ENSMUSG00000010914	27402	NA	NA	-0.399031	NA	-0.0249217	GO:0006082~organic acid metabolic process,GO:0006084~acetyl-CoA metabolic process,GO:0006085~acetyl-CoA biosynthetic process,GO:0006086~acetyl-CoA biosynthetic process from pyruvate,GO:0006090~pyruvate metabolic process,GO:0006139~nucleobase-containing compound metabolic process,GO:0006637~acyl-CoA metabolic process,GO:0006725~cellular aromatic compound metabolic process,GO:0006732~coenzyme metab…	GO:0005622~intracellular,GO:0005623~cell,GO:0005737~cytoplasm,GO:0005739~mitochondrion,GO:0005759~mitochondrial matrix,GO:0031974~membrane-enclosed lumen,GO:0032991~macromolecular complex,GO:0043226~organelle,GO:0043227~membrane-bounded organelle,GO:0043229~intracellular organelle,GO:0043231~intracellular membrane-bounded organelle,GO:0043233~organelle lumen,GO:0043234~protein complex,GO:0044422~…	GO:0003824~catalytic activity,GO:0004738~pyruvate dehydrogenase activity,GO:0016491~oxidoreductase activity,GO:0016620~oxidoreductase activity, acting on the aldehyde or oxo group of donors, NAD or NADP as acceptor,GO:0016740~transferase activity,GO:0016746~transferase activity, transferring acyl groups,GO:0016903~oxidoreductase activity, acting on the aldehyde or oxo group of donors,GO:0034603~p…	IPR000089:Biotin/lipoyl attachment,IPR001078:2-oxoacid dehydrogenase acyltransferase, catalytic domain,IPR003016:2-oxo acid dehydrogenase, lipoyl-binding site,IPR004167:E3 binding,IPR011053:Single hybrid motif,IPR023213:Chloramphenicol acetyltransferase-like domain,	mmu01100:Metabolic pathways,	PF00198:2-oxoacid dehydrogenases acyltransferase (catalytic domain),PF00364:Biotin-requiring enzyme,PF02817:e3 binding domain,	R-MMU-204174:R-MMU-204174,R-MMU-389661:R-MMU-389661,R-MMU-5362517:R-MMU-5362517,R-MMU-70268:R-MMU-70268,	Brain,Corpus striatum,	Acetylation,Complete proteome,Lipoyl,Mitochondrion,Phosphoprotein,Proteomics identification,Reference proteome,Transit peptide,	chain:Pyruvate dehydrogenase protein X component, mitochondrial,compositionally biased region:Pro-rich,domain:Lipoyl-binding,modified residue,region of interest:Interaction with DLD,transit peptide:Mitochondrion,	0	3028:Pdhx~pyruvate dehydrogenase complex, component X,	0	0	0	14056:enhancer of zeste 2 polycomb repressive complex 2 subunit(Ezh2),22627:tyrosine 3-monooxygenase/tryptophan 5-monooxygenase activation protein, epsilon polypeptide(Ywhae),	0	Neuron-optimal	NA	NA	NA
PISD	phosphatidylserine decarboxylase(Pisd)	ENSMUSG00000023452	320951	NA	NA	0.105108	NA	-0.0147937	GO:0006508~proteolysis,GO:0006629~lipid metabolic process,GO:0006644~phospholipid metabolic process,GO:0006646~phosphatidylethanolamine biosynthetic process,GO:0006650~glycerophospholipid metabolic process,GO:0006793~phosphorus metabolic process,GO:0006796~phosphate-containing compound metabolic process,GO:0008152~metabolic process,GO:0008610~lipid biosynthetic process,GO:0008654~phospholipid bio…	GO:0005622~intracellular,GO:0005623~cell,GO:0005634~nucleus,GO:0005737~cytoplasm,GO:0005739~mitochondrion,GO:0005740~mitochondrial envelope,GO:0005743~mitochondrial inner membrane,GO:0016020~membrane,GO:0016021~integral component of membrane,GO:0019866~organelle inner membrane,GO:0031090~organelle membrane,GO:0031224~intrinsic component of membrane,GO:0031300~intrinsic component of organelle memb…	GO:0003824~catalytic activity,GO:0004609~phosphatidylserine decarboxylase activity,GO:0016829~lyase activity,GO:0016830~carbon-carbon lyase activity,GO:0016831~carboxy-lyase activity,	IPR003817:Phosphatidylserine decarboxylase-related,	mmu00564:Glycerophospholipid metabolism,mmu01100:Metabolic pathways,	PF02666:Phosphatidylserine decarboxylase,		Brain,Colon,Mullerian duct includes surrounding region,PCR rescued clones,Placenta,Thymus,	Complete proteome,Decarboxylase,Lipid biosynthesis,Lipid metabolism,Lyase,Membrane,Mitochondrion,Mitochondrion inner membrane,Phospholipid biosynthesis,Phospholipid metabolism,Pyruvate,Reference proteome,Transit peptide,Transmembrane,Transmembrane helix,Zymogen,	chain:Phosphatidylserine decarboxylase alpha chain,chain:Phosphatidylserine decarboxylase beta chain,modified residue,sequence conflict,site:Cleavage (non-hydrolytic),					4.1.1.65,			NA	NA	Neuron-central	Astrocyte-central
PLPP3	phospholipid phosphatase 3(Plpp3)	ENSMUSG00000028517	67916	NA	-0.69785	2.5575	NA	NA	GO:0001568~blood vessel development,GO:0001667~ameboidal-type cell migration,GO:0001702~gastrulation with mouth forming second,GO:0001932~regulation of protein phosphorylation,GO:0001933~negative regulation of protein phosphorylation,GO:0001934~positive regulation of protein phosphorylation,GO:0001944~vasculature development,GO:0006139~nucleobase-containing compound metabolic process,GO:0006351~t…	GO:0005576~extracellular region,GO:0005622~intracellular,GO:0005623~cell,GO:0005737~cytoplasm,GO:0005783~endoplasmic reticulum,GO:0005789~endoplasmic reticulum membrane,GO:0005794~Golgi apparatus,GO:0005886~plasma membrane,GO:0005887~integral component of plasma membrane,GO:0012505~endomembrane system,GO:0016020~membrane,GO:0016021~integral component of membrane,GO:0031224~intrinsic component of …	GO:0003824~catalytic activity,GO:0005102~receptor binding,GO:0005178~integrin binding,GO:0005488~binding,GO:0005515~protein binding,GO:0008195~phosphatidate phosphatase activity,GO:0016787~hydrolase activity,GO:0016788~hydrolase activity, acting on ester bonds,GO:0016791~phosphatase activity,GO:0032403~protein complex binding,GO:0042392~sphingosine-1-phosphate phosphatase activity,GO:0042577~lipi…	IPR000326:Phosphatidic acid phosphatase type 2/haloperoxidase,	mmu00561:Glycerolipid metabolism,mmu00564:Glycerophospholipid metabolism,mmu00565:Ether lipid metabolism,mmu00600:Sphingolipid metabolism,mmu01100:Metabolic pathways,mmu04666:Fc gamma R-mediated phagocytosis,mmu04975:Fat digestion and absorption,mmu05231:Choline metabolism in cancer,	PF01569:PAP2 superfamily,	R-MMU-1660661:R-MMU-1660661,	Brain,Mammary gland,	Complete proteome,Developmental protein,Direct protein sequencing,Endoplasmic reticulum,Glycoprotein,Hydrolase,Membrane,Phosphoprotein,Reference proteome,Transmembrane,Transmembrane helix,	chain:Lipid phosphate phosphohydrolase 3,glycosylation site:N-linked (GlcNAc...),modified residue,sequence conflict,topological domain:Cytoplasmic,topological domain:Lumenal,transmembrane region,					3.1.3.4,	11964:ATPase, H+ transporting, lysosomal V1 subunit A(Atp6v1a),13385:discs, large homolog 4 (Drosophila)(Dlg4),54401:tyrosine 3-monooxygenase/tryptophan 5-monooxygenase activation protein, beta polypeptide(Ywhab),		NA	Astrocyte-optimal	Neuron-central	Astrocyte-central
ppa1	pyrophosphatase (inorganic) 1(Ppa1)	ENSMUSG00000020089	67895	NA	NA	NA	NA	-0.022515	GO:0006793~phosphorus metabolic process,GO:0006796~phosphate-containing compound metabolic process,GO:0008152~metabolic process,GO:0009987~cellular process,GO:0044237~cellular metabolic process,	GO:0005576~extracellular region,GO:0005622~intracellular,GO:0005623~cell,GO:0005737~cytoplasm,GO:0031982~vesicle,GO:0031988~membrane-bounded vesicle,GO:0043226~organelle,GO:0043227~membrane-bounded organelle,GO:0043230~extracellular organelle,GO:0044421~extracellular region part,GO:0044424~intracellular part,GO:0044464~cell part,GO:0070062~extracellular exosome,GO:1903561~extracellular vesicle,	GO:0000287~magnesium ion binding,GO:0003824~catalytic activity,GO:0004427~inorganic diphosphatase activity,GO:0005488~binding,GO:0016462~pyrophosphatase activity,GO:0016787~hydrolase activity,GO:0016817~hydrolase activity, acting on acid anhydrides,GO:0016818~hydrolase activity, acting on acid anhydrides, in phosphorus-containing anhydrides,GO:0043167~ion binding,GO:0043169~cation binding,GO:0046…	IPR008162:Inorganic pyrophosphatase,	mmu00190:Oxidative phosphorylation,	PF00719:Inorganic pyrophosphatase,	R-MMU-379716:R-MMU-379716,R-MMU-71737:R-MMU-71737,	Bone marrow,Hippocampus,Mammary tumor,Small intestine,Thymus,	Acetylation,Complete proteome,Cytoplasm,Direct protein sequencing,Hydrolase,Magnesium,Metal-binding,Phosphoprotein,Reference proteome,	chain:Inorganic pyrophosphatase,metal ion-binding site:Magnesium 1,metal ion-binding site:Magnesium 2,modified residue,	0	170484:Ppa1~pyrophosphatase (inorganic) 1,	0	0	3.6.1.1,	101502:hydroxy-delta-5-steroid dehydrogenase, 3 beta- and steroid delta-isomerase 7(Hsd3b7),15364:high mobility group AT-hook 2(Hmga2),22627:tyrosine 3-monooxygenase/tryptophan 5-monooxygenase activation protein, epsilon polypeptide(Ywhae),66171:6-phosphogluconolactonase(Pgls),	0	NA	Astrocyte-optimal	Neuron-central	Astrocyte-central
PPA2	pyrophosphatase (inorganic) 2(Ppa2)	ENSMUSG00000028013	74776	NA	NA	0.537026	NA	0.00755893	GO:0006793~phosphorus metabolic process,GO:0006796~phosphate-containing compound metabolic process,GO:0008152~metabolic process,GO:0009987~cellular process,GO:0044237~cellular metabolic process,	GO:0005576~extracellular region,GO:0005622~intracellular,GO:0005623~cell,GO:0005737~cytoplasm,GO:0005739~mitochondrion,GO:0031982~vesicle,GO:0031988~membrane-bounded vesicle,GO:0043226~organelle,GO:0043227~membrane-bounded organelle,GO:0043229~intracellular organelle,GO:0043230~extracellular organelle,GO:0043231~intracellular membrane-bounded organelle,GO:0044421~extracellular region part,GO:0044…	GO:0000287~magnesium ion binding,GO:0003824~catalytic activity,GO:0004427~inorganic diphosphatase activity,GO:0004721~phosphoprotein phosphatase activity,GO:0004722~protein serine/threonine phosphatase activity,GO:0005488~binding,GO:0016462~pyrophosphatase activity,GO:0016787~hydrolase activity,GO:0016788~hydrolase activity, acting on ester bonds,GO:0016791~phosphatase activity,GO:0016817~hydrola…	IPR008162:Inorganic pyrophosphatase,	mmu00190:Oxidative phosphorylation,	PF00719:Inorganic pyrophosphatase,	R-MMU-379726:R-MMU-379726,R-MMU-71737:R-MMU-71737,	Embryo,Mammary tumor,Spinal cord,	Acetylation,Alternative splicing,Complete proteome,Hydrolase,Magnesium,Metal-binding,Mitochondrion,Proteomics identification,Reference proteome,Transit peptide,	chain:Inorganic pyrophosphatase 2, mitochondrial,metal ion-binding site:Magnesium 1,metal ion-binding site:Magnesium 2,modified residue,sequence conflict,splice variant,transit peptide:Mitochondrion,	0	170484:Ppa2~pyrophosphatase (inorganic) 2,3028:Ppa2~pyrophosphatase (inorganic) 2,	0	0	3.6.1.1,	100043456:predicted gene 10681(Gm10681),15495:hydroxy-delta-5-steroid dehydrogenase, 3 beta- and steroid delta-isomerase 4(Hsd3b4),22627:tyrosine 3-monooxygenase/tryptophan 5-monooxygenase activation protein, epsilon polypeptide(Ywhae),66171:6-phosphogluconolactonase(Pgls),	0	NA	Astrocyte-optimal	Neuron-central	Astrocyte-central
sdha	succinate dehydrogenase complex, subunit A, flavoprotein (Fp)(Sdha)	ENSMUSG00000021577	66945	NA	NA	NA	-0.0353324	-0.0451548	GO:0006082~organic acid metabolic process,GO:0006091~generation of precursor metabolites and energy,GO:0006099~tricarboxylic acid cycle,GO:0006105~succinate metabolic process,GO:0006119~oxidative phosphorylation,GO:0006121~mitochondrial electron transport, succinate to ubiquinone,GO:0006139~nucleobase-containing compound metabolic process,GO:0006163~purine nucleotide metabolic process,GO:0006725~…	GO:0005622~intracellular,GO:0005623~cell,GO:0005737~cytoplasm,GO:0005739~mitochondrion,GO:0005740~mitochondrial envelope,GO:0005743~mitochondrial inner membrane,GO:0005746~mitochondrial respiratory chain,GO:0005749~mitochondrial respiratory chain complex II, succinate dehydrogenase complex (ubiquinone),GO:0016020~membrane,GO:0019866~organelle inner membrane,GO:0031090~organelle membrane,GO:003196…	GO:0000104~succinate dehydrogenase activity,GO:0000166~nucleotide binding,GO:0003824~catalytic activity,GO:0005488~binding,GO:0008177~succinate dehydrogenase (ubiquinone) activity,GO:0009055~electron carrier activity,GO:0016491~oxidoreductase activity,GO:0016627~oxidoreductase activity, acting on the CH-CH group of donors,GO:0016635~oxidoreductase activity, acting on the CH-CH group of donors, qu…	IPR003952:Fumarate reductase/succinate dehydrogenase, FAD-binding site,IPR003953:FAD binding domain,IPR011281:Succinate dehydrogenase, flavoprotein subunit,IPR014006:Succinate dehydrogenase/fumarate reductase, flavoprotein subunit,IPR015939:Fumarate reductase/succinate dehydrogenase flavoprotein-like, C-terminal,IPR023753:Pyridine nucleotide-disulphide oxidoreductase, FAD/NAD(P)-binding domain,IP…	mmu00020:Citrate cycle (TCA cycle),mmu00190:Oxidative phosphorylation,mmu01100:Metabolic pathways,mmu01130:Biosynthesis of antibiotics,mmu01200:Carbon metabolism,mmu04932:Non-alcoholic fatty liver disease (NAFLD),mmu05010:Alzheimer's disease,mmu05012:Parkinson's disease,mmu05016:Huntington's disease,	PF00890:FAD binding domain,PF02910:Fumarate reductase flavoprotein C-term,	R-MMU-71403:R-MMU-71403,	Bone marrow,Brain,Egg,Heart,Hippocampus,Liver,Mammary gland,Mammary tumor,Pancreas,Testis,Uterus,	Acetylation,Complete proteome,Direct protein sequencing,Electron transport,FAD,Flavoprotein,Membrane,Mitochondrion,Mitochondrion inner membrane,Oxidoreductase,Phosphoprotein,Reference proteome,Transit peptide,Transport,Tricarboxylic acid cycle,Tumor suppressor,	active site:Proton acceptor,binding site:Substrate,chain:Succinate dehydrogenase [ubiquinone] flavoprotein subunit, mitochondrial,modified residue,nucleotide phosphate-binding region:FAD,sequence conflict,transit peptide:Mitochondrion,	0	3028:Sdha~succinate dehydrogenase complex, subunit A, flavoprotein (Fp),	0	0	1.3.5.1,	100043456:predicted gene 10681(Gm10681),101502:hydroxy-delta-5-steroid dehydrogenase, 3 beta- and steroid delta-isomerase 7(Hsd3b7),13385:discs, large homolog 4 (Drosophila)(Dlg4),15495:hydroxy-delta-5-steroid dehydrogenase, 3 beta- and steroid delta-isomerase 4(Hsd3b4),16202:integrin linked kinase(Ilk),22627:tyrosine 3-monooxygenase/tryptophan 5-monooxygenase activation protein, epsilon polypept…	0	Neuron-optimal	NA	NA	NA
sdhd	succinate dehydrogenase complex, subunit D, integral membrane protein(Sdhd)	ENSMUSG00000000171	66925	NA	NA	NA	-0.0104454	-0.0331745	GO:0001666~response to hypoxia,GO:0006082~organic acid metabolic process,GO:0006091~generation of precursor metabolites and energy,GO:0006099~tricarboxylic acid cycle,GO:0006119~oxidative phosphorylation,GO:0006121~mitochondrial electron transport, succinate to ubiquinone,GO:0006139~nucleobase-containing compound metabolic process,GO:0006163~purine nucleotide metabolic process,GO:0006725~cellular…	GO:0005622~intracellular,GO:0005623~cell,GO:0005737~cytoplasm,GO:0005739~mitochondrion,GO:0005740~mitochondrial envelope,GO:0005743~mitochondrial inner membrane,GO:0005746~mitochondrial respiratory chain,GO:0005749~mitochondrial respiratory chain complex II, succinate dehydrogenase complex (ubiquinone),GO:0016020~membrane,GO:0016021~integral component of membrane,GO:0019866~organelle inner membra…	GO:0000104~succinate dehydrogenase activity,GO:0003824~catalytic activity,GO:0005488~binding,GO:0008177~succinate dehydrogenase (ubiquinone) activity,GO:0016491~oxidoreductase activity,GO:0016627~oxidoreductase activity, acting on the CH-CH group of donors,GO:0016635~oxidoreductase activity, acting on the CH-CH group of donors, quinone or related compound as acceptor,GO:0020037~heme binding,GO:00…	IPR007992:Succinate dehydrogenase [ubiquinone] cytochrome b small subunit, CybS,	mmu00020:Citrate cycle (TCA cycle),mmu00190:Oxidative phosphorylation,mmu01100:Metabolic pathways,mmu01130:Biosynthesis of antibiotics,mmu01200:Carbon metabolism,mmu04932:Non-alcoholic fatty liver disease (NAFLD),mmu05010:Alzheimer's disease,mmu05012:Parkinson's disease,mmu05016:Huntington's disease,	0	R-MMU-71403:R-MMU-71403,	Egg,Head,Hippocampus,	Complete proteome,Electron transport,Heme,Iron,Membrane,Metal-binding,Mitochondrion,Mitochondrion inner membrane,Reference proteome,Transit peptide,Transmembrane,Transmembrane helix,Transport,Tricarboxylic acid cycle,	binding site:Ubiquinone; shared with IP/sdhb,chain:Succinate dehydrogenase [ubiquinone] cytochrome b small subunit, mitochondrial,metal ion-binding site:Iron (heme axial ligand); shared with SDHC,topological domain:Mitochondrial intermembrane,topological domain:Mitochondrial matrix,transit peptide:Mitochondrion,transmembrane region,	0	0	0	0	0	0	0	Neuron-optimal	NA	NA	NA
SHMT2	serine hydroxymethyltransferase 2 (mitochondrial)(Shmt2)	ENSMUSG00000025403	108037	NA	NA	0.47399	NA	-0.00633669	GO:0002376~immune system process,GO:0006082~organic acid metabolic process,GO:0006461~protein complex assembly,GO:0006464~cellular protein modification process,GO:0006508~proteolysis,GO:0006520~cellular amino acid metabolic process,GO:0006544~glycine metabolic process,GO:0006545~glycine biosynthetic process,GO:0006563~L-serine metabolic process,GO:0006564~L-serine biosynthetic process,GO:0006575~…	GO:0005576~extracellular region,GO:0005622~intracellular,GO:0005623~cell,GO:0005634~nucleus,GO:0005737~cytoplasm,GO:0005739~mitochondrion,GO:0005740~mitochondrial envelope,GO:0005743~mitochondrial inner membrane,GO:0005758~mitochondrial intermembrane space,GO:0005759~mitochondrial matrix,GO:0005856~cytoskeleton,GO:0009295~nucleoid,GO:0015630~microtubule cytoskeleton,GO:0016020~membrane,GO:0019866…	GO:0003682~chromatin binding,GO:0003824~catalytic activity,GO:0004372~glycine hydroxymethyltransferase activity,GO:0004793~threonine aldolase activity,GO:0005488~binding,GO:0005515~protein binding,GO:0008168~methyltransferase activity,GO:0008732~L-allo-threonine aldolase activity,GO:0016597~amino acid binding,GO:0016740~transferase activity,GO:0016741~transferase activity, transferring one-carbon…	IPR001085:Serine hydroxymethyltransferase,IPR015421:Pyridoxal phosphate-dependent transferase, major region, subdomain 1,IPR015422:Pyridoxal phosphate-dependent transferase, major region, subdomain 2,IPR015424:Pyridoxal phosphate-dependent transferase,IPR019798:Serine hydroxymethyltransferase, pyridoxal phosphate binding site,	mmu00260:Glycine, serine and threonine metabolism,mmu00460:Cyanoamino acid metabolism,mmu00630:Glyoxylate and dicarboxylate metabolism,mmu00670:One carbon pool by folate,mmu01100:Metabolic pathways,mmu01130:Biosynthesis of antibiotics,mmu01200:Carbon metabolism,mmu01230:Biosynthesis of amino acids,	PF00464:Serine hydroxymethyltransferase,	R-MMU-196757:R-MMU-196757,	Embryonic body between diaphragm region and neck,Kidney,Liver,Mammary tumor. C3,Spinal ganglion,Thymus,Whole body,	Complete proteome,Methyltransferase,One-carbon metabolism,Proteomics identification,Pyridoxal phosphate,Reference proteome,Transferase,	0	0	56086:Shmt2~serine hydroxymethyltransferase 2 (mitochondrial),	0	0	2.1.2.1,	100043456:predicted gene 10681(Gm10681),15495:hydroxy-delta-5-steroid dehydrogenase, 3 beta- and steroid delta-isomerase 4(Hsd3b4),22627:tyrosine 3-monooxygenase/tryptophan 5-monooxygenase activation protein, epsilon polypeptide(Ywhae),	0	NA	NA	Neuron-central	Astrocyte-central
slc16a1	solute carrier family 16 (monocarboxylic acid transporters), member 1(Slc16a1)	ENSMUSG00000032902	20501	NA	NA	NA	-0.0076937	NA	GO:0000226~microtubule cytoskeleton organization,GO:0002790~peptide secretion,GO:0002791~regulation of peptide secretion,GO:0006629~lipid metabolic process,GO:0006810~transport,GO:0006811~ion transport,GO:0006820~anion transport,GO:0006996~organelle organization,GO:0007010~cytoskeleton organization,GO:0007017~microtubule-based process,GO:0007154~cell communication,GO:0007267~cell-cell signaling,G…	GO:0005576~extracellular region,GO:0005622~intracellular,GO:0005623~cell,GO:0005737~cytoplasm,GO:0005739~mitochondrion,GO:0005813~centrosome,GO:0005815~microtubule organizing center,GO:0005856~cytoskeleton,GO:0005886~plasma membrane,GO:0005887~integral component of plasma membrane,GO:0015630~microtubule cytoskeleton,GO:0016020~membrane,GO:0016021~integral component of membrane,GO:0031224~intrinsi…	GO:0005215~transporter activity,GO:0005342~organic acid transmembrane transporter activity,GO:0005488~binding,GO:0005515~protein binding,GO:0008028~monocarboxylic acid transmembrane transporter activity,GO:0008509~anion transmembrane transporter activity,GO:0008514~organic anion transmembrane transporter activity,GO:0015075~ion transmembrane transporter activity,GO:0015129~lactate transmembrane t…	IPR004743:Monocarboxylate transporter,IPR011701:Major facilitator superfamily,IPR020846:Major facilitator superfamily domain,	0	PF07690:Major Facilitator Superfamily,	R-MMU-210991:R-MMU-210991,R-MMU-433692:R-MMU-433692,R-MMU-70268:R-MMU-70268,	Brain,Brain cortex,Cerebellum,Colon,Eyeball,In vitro fertilized eggs,Kidney,Liver,Macrophage,Mammary gland,Placenta,Thymus,Vagina,Whole body,	Cell membrane,Complete proteome,Membrane,Phosphoprotein,Reference proteome,Symport,Transmembrane,Transmembrane helix,Transport,	chain:Monocarboxylate transporter 1,modified residue,topological domain:Cytoplasmic,topological domain:Extracellular,transmembrane region,	0	13626:Slc16a1~solute carrier family 16 (monocarboxylic acid transporters), member 1,217331:Slc16a1~solute carrier family 16 (monocarboxylic acid transporters), member 1,	0	0	0	0	0	Neuron-optimal	NA	Neuron-central	Astrocyte-central
slc16a7	solute carrier family 16 (monocarboxylic acid transporters), member 7(Slc16a7)	ENSMUSG00000020102	20503	NA	NA	NA	NA	-0.0379195	GO:0006810~transport,GO:0006811~ion transport,GO:0006820~anion transport,GO:0006848~pyruvate transport,GO:0009987~cellular process,GO:0015711~organic anion transport,GO:0015718~monocarboxylic acid transport,GO:0015727~lactate transport,GO:0034220~ion transmembrane transport,GO:0035873~lactate transmembrane transport,GO:0035879~plasma membrane lactate transport,GO:0044699~single-organism process,G…	GO:0005622~intracellular,GO:0005623~cell,GO:0005737~cytoplasm,GO:0005886~plasma membrane,GO:0005887~integral component of plasma membrane,GO:0016020~membrane,GO:0016021~integral component of membrane,GO:0031224~intrinsic component of membrane,GO:0031226~intrinsic component of plasma membrane,GO:0044424~intracellular part,GO:0044425~membrane part,GO:0044459~plasma membrane part,GO:0044464~cell par…	GO:0005215~transporter activity,GO:0005342~organic acid transmembrane transporter activity,GO:0008028~monocarboxylic acid transmembrane transporter activity,GO:0008509~anion transmembrane transporter activity,GO:0008514~organic anion transmembrane transporter activity,GO:0015075~ion transmembrane transporter activity,GO:0015129~lactate transmembrane transporter activity,GO:0015291~secondary activ…	IPR004743:Monocarboxylate transporter,IPR011701:Major facilitator superfamily,IPR020846:Major facilitator superfamily domain,IPR027178:Monocarboxylate transporter 2,	0	PF07690:Major Facilitator Superfamily,	R-MMU-433692:R-MMU-433692,	Kidney,PCR rescued clones,Testis,	Cell membrane,Complete proteome,Membrane,Reference proteome,Symport,Transmembrane,Transmembrane helix,Transport,	chain:Monocarboxylate transporter 2,topological domain:Cytoplasmic,topological domain:Extracellular,transmembrane region,	0	0	0	0	0	0	0	NA	NA	Neuron-central	Astrocyte-central
SLC1A2	solute carrier family 1 (glial high affinity glutamate transporter), member 2(Slc1a2)	ENSMUSG00000005089	20511	NA	NA	0.202012	-0.0130324	0.0175032	GO:0001101~response to acid chemical,GO:0006810~transport,GO:0006811~ion transport,GO:0006820~anion transport,GO:0006835~dicarboxylic acid transport,GO:0006865~amino acid transport,GO:0006950~response to stress,GO:0007154~cell communication,GO:0007275~multicellular organism development,GO:0007399~nervous system development,GO:0007417~central nervous system development,GO:0007420~brain development…	GO:0005623~cell,GO:0005886~plasma membrane,GO:0005887~integral component of plasma membrane,GO:0009986~cell surface,GO:0016020~membrane,GO:0016021~integral component of membrane,GO:0030424~axon,GO:0030425~dendrite,GO:0030673~axolemma,GO:0031224~intrinsic component of membrane,GO:0031226~intrinsic component of plasma membrane,GO:0031252~cell leading edge,GO:0031253~cell projection membrane,GO:0031…	GO:0005215~transporter activity,GO:0005283~sodium:amino acid symporter activity,GO:0005313~L-glutamate transmembrane transporter activity,GO:0005314~high-affinity glutamate transmembrane transporter activity,GO:0005342~organic acid transmembrane transporter activity,GO:0005343~organic acid:sodium symporter activity,GO:0005416~cation:amino acid symporter activity,GO:0008324~cation transmembrane tr…	IPR001991:Sodium:dicarboxylate symporter,IPR018107:Sodium:dicarboxylate symporter, conserved site,	mmu04724:Glutamatergic synapse,mmu05014:Amyotrophic lateral sclerosis (ALS),	PF00375:Sodium:dicarboxylate symporter family,	R-MMU-210455:R-MMU-210455,R-MMU-210500:R-MMU-210500,R-MMU-425393:R-MMU-425393,	Brain,Brain cortex,Cerebellum,Corpora quadrigemina,Liver,Medulla oblongata,	Alternative splicing,Complete proteome,Direct protein sequencing,Glycoprotein,Lipoprotein,Membrane,Palmitate,Phosphoprotein,Proteomics identification,Reference proteome,Symport,Transmembrane,Transmembrane helix,Transport,	chain:Excitatory amino acid transporter 2,glycosylation site:N-linked (GlcNAc...),modified residue,sequence conflict,splice variant,topological domain:Cytoplasmic,topological domain:Extracellular,transmembrane region,		12367:Slc1a2~solute carrier family 1 (glial high affinity glutamate transporter), member 2,15194:Slc1a2~solute carrier family 1 (glial high affinity glutamate transporter), member 2,6622:Slc1a2~solute carrier family 1 (glial high affinity glutamate transporter), member 2,7329:UBE2I~ubiquitin conjugating enzyme E2 I,				13385:discs, large homolog 4 (Drosophila)(Dlg4),14812:glutamate receptor, ionotropic, NMDA2B (epsilon 2)(Grin2b),20977:synaptophysin(Syp),22627:tyrosine 3-monooxygenase/tryptophan 5-monooxygenase activation protein, epsilon polypeptide(Ywhae),54401:tyrosine 3-monooxygenase/tryptophan 5-monooxygenase activation protein, beta polypeptide(Ywhab),		NA	Astrocyte-optimal	NA	NA
SLC1A3	solute carrier family 1 (glial high affinity glutamate transporter), member 3(Slc1a3)	ENSMUSG00000005360	20512	NA	NA	2.78755	-0.0303229	0.0053658	GO:0000422~mitophagy,GO:0000423~macromitophagy,GO:0000902~cell morphogenesis,GO:0000904~cell morphogenesis involved in differentiation,GO:0001101~response to acid chemical,GO:0002230~positive regulation of defense response to virus by host,GO:0002252~immune effector process,GO:0002376~immune system process,GO:0002682~regulation of immune system process,GO:0002697~regulation of immune effector pro…	GO:0005576~extracellular region,GO:0005578~proteinaceous extracellular matrix,GO:0005622~intracellular,GO:0005623~cell,GO:0005737~cytoplasm,GO:0005739~mitochondrion,GO:0005740~mitochondrial envelope,GO:0005743~mitochondrial inner membrane,GO:0005886~plasma membrane,GO:0009986~cell surface,GO:0016020~membrane,GO:0016021~integral component of membrane,GO:0016323~basolateral plasma membrane,GO:00198…	GO:0005215~transporter activity,GO:0005313~L-glutamate transmembrane transporter activity,GO:0005314~high-affinity glutamate transmembrane transporter activity,GO:0005342~organic acid transmembrane transporter activity,GO:0005488~binding,GO:0005515~protein binding,GO:0008324~cation transmembrane transporter activity,GO:0008509~anion transmembrane transporter activity,GO:0008514~organic anion tran…	IPR001991:Sodium:dicarboxylate symporter,IPR018107:Sodium:dicarboxylate symporter, conserved site,	mmu04724:Glutamatergic synapse,	PF00375:Sodium:dicarboxylate symporter family,	R-MMU-210455:R-MMU-210455,R-MMU-210500:R-MMU-210500,R-MMU-425393:R-MMU-425393,	Aorta and vein,Brain,Brain cortex,Cerebellum,Corpora quadrigemina,Lung,Neural Stem Cell,Visual cortex,	Complete proteome,Direct protein sequencing,Glycoprotein,Membrane,Phosphoprotein,Proteomics identification,Reference proteome,Symport,Transmembrane,Transmembrane helix,Transport,	chain:Excitatory amino acid transporter 1,compositionally biased region:Poly-Ser,glycosylation site:N-linked (GlcNAc...),modified residue,topological domain:Cytoplasmic,topological domain:Extracellular,transmembrane region,		18952:Sept4~septin 4,22631:Slc1a3~solute carrier family 1 (glial high affinity glutamate transporter), member 3,6622:Slc1a3~solute carrier family 1 (glial high affinity glutamate transporter), member 3,				13385:discs, large homolog 4 (Drosophila)(Dlg4),22627:tyrosine 3-monooxygenase/tryptophan 5-monooxygenase activation protein, epsilon polypeptide(Ywhae),		NA	Astrocyte-optimal	NA	NA
SLC25A10	solute carrier family 25 (mitochondrial carrier, dicarboxylate transporter), member 10(Slc25a10)	ENSMUSG00000025792	27376	NA	-0.505167	-0.51304	NA	NA	GO:0006412~translation,GO:0006518~peptide metabolic process,GO:0006807~nitrogen compound metabolic process,GO:0006810~transport,GO:0006811~ion transport,GO:0006817~phosphate ion transport,GO:0006820~anion transport,GO:0006835~dicarboxylic acid transport,GO:0006839~mitochondrial transport,GO:0008152~metabolic process,GO:0008272~sulfate transport,GO:0009058~biosynthetic process,GO:0009059~macromole…	GO:0005622~intracellular,GO:0005623~cell,GO:0005634~nucleus,GO:0005737~cytoplasm,GO:0005739~mitochondrion,GO:0005740~mitochondrial envelope,GO:0005743~mitochondrial inner membrane,GO:0016020~membrane,GO:0016021~integral component of membrane,GO:0019866~organelle inner membrane,GO:0031090~organelle membrane,GO:0031224~intrinsic component of membrane,GO:0031966~mitochondrial membrane,GO:0031967~org…	GO:0003735~structural constituent of ribosome,GO:0005198~structural molecule activity,GO:0005215~transporter activity,GO:0005310~dicarboxylic acid transmembrane transporter activity,GO:0005342~organic acid transmembrane transporter activity,GO:0008509~anion transmembrane transporter activity,GO:0008514~organic anion transmembrane transporter activity,GO:0015075~ion transmembrane transporter activ…	IPR002030:Mitochondrial brown fat uncoupling protein,IPR018108:Mitochondrial substrate/solute carrier,IPR023395:Mitochondrial carrier domain,	mmu04964:Proximal tubule bicarbonate reclamation,	PF00153:Mitochondrial carrier protein,	R-MMU-1614517:R-MMU-1614517,R-MMU-428643:R-MMU-428643,R-MMU-70263:R-MMU-70263,	Bone marrow,Liver,Small intestine,	Acetylation,Complete proteome,Membrane,Mitochondrion,Mitochondrion inner membrane,Reference proteome,Repeat,Transmembrane,Transmembrane helix,Transport,	chain:Mitochondrial dicarboxylate carrier,repeat:Solcar 1,repeat:Solcar 2,repeat:Solcar 3,sequence conflict,transmembrane region,		13626:Slc25a10~solute carrier family 25 (mitochondrial carrier, dicarboxylate transporter), member 10,170484:Slc25a10~solute carrier family 25 (mitochondrial carrier, dicarboxylate transporter), member 10,				100043456:predicted gene 10681(Gm10681),15495:hydroxy-delta-5-steroid dehydrogenase, 3 beta- and steroid delta-isomerase 4(Hsd3b4),22627:tyrosine 3-monooxygenase/tryptophan 5-monooxygenase activation protein, epsilon polypeptide(Ywhae),		Neuron-optimal	NA	NA	NA
slc25a11	solute carrier family 25 (mitochondrial carrier oxoglutarate carrier), member 11(Slc25a11)	ENSMUSG00000014606	67863	NA	NA	NA	NA	-0.0303927	GO:0006412~translation,GO:0006518~peptide metabolic process,GO:0006807~nitrogen compound metabolic process,GO:0006810~transport,GO:0008152~metabolic process,GO:0009058~biosynthetic process,GO:0009059~macromolecule biosynthetic process,GO:0009987~cellular process,GO:0010467~gene expression,GO:0019538~protein metabolic process,GO:0034641~cellular nitrogen compound metabolic process,GO:0034645~cellu…	GO:0005622~intracellular,GO:0005623~cell,GO:0005634~nucleus,GO:0005737~cytoplasm,GO:0005739~mitochondrion,GO:0005740~mitochondrial envelope,GO:0005743~mitochondrial inner membrane,GO:0016020~membrane,GO:0016021~integral component of membrane,GO:0019866~organelle inner membrane,GO:0031090~organelle membrane,GO:0031224~intrinsic component of membrane,GO:0031966~mitochondrial membrane,GO:0031967~org…	GO:0003676~nucleic acid binding,GO:0003723~RNA binding,GO:0003735~structural constituent of ribosome,GO:0005198~structural molecule activity,GO:0005215~transporter activity,GO:0005488~binding,GO:0044822~poly(A) RNA binding,GO:0097159~organic cyclic compound binding,GO:1901363~heterocyclic compound binding,	IPR018108:Mitochondrial substrate/solute carrier,IPR023395:Mitochondrial carrier domain,	0	PF00153:Mitochondrial carrier protein,	R-MMU-70263:R-MMU-70263,R-MMU-70326:R-MMU-70326,	Brain,Kidney,Mammary gland,Tongue,Whole body,	Acetylation,Complete proteome,Direct protein sequencing,Membrane,Mitochondrion,Mitochondrion inner membrane,Phosphoprotein,Proteomics identification,Reference proteome,Repeat,Transmembrane,Transmembrane helix,Transport,	chain:Mitochondrial 2-oxoglutarate/malate carrier protein,modified residue,repeat:Solcar 1,repeat:Solcar 2,repeat:Solcar 3,transmembrane region,	m_malatePathway:Malate-aspartate shuttle,m_malatexPathway:Shuttle for transfer of acetyl groups from mitochondria to the cytosol,	13626:Slc25a11~solute carrier family 25 (mitochondrial carrier oxoglutarate carrier), member 11,15194:Slc25a11~solute carrier family 25 (mitochondrial carrier oxoglutarate carrier), member 11,6622:Slc25a11~solute carrier family 25 (mitochondrial carrier oxoglutarate carrier), member 11,	0	0	0	18754:protein kinase C, epsilon(Prkce),22627:tyrosine 3-monooxygenase/tryptophan 5-monooxygenase activation protein, epsilon polypeptide(Ywhae),54401:tyrosine 3-monooxygenase/tryptophan 5-monooxygenase activation protein, beta polypeptide(Ywhab),	0	Neuron-optimal	NA	NA	NA
slc25a12	solute carrier family 25 (mitochondrial carrier, Aralar), member 12(Slc25a12)	ENSMUSG00000027010	78830	NA	NA	NA	NA	-0.0379925	GO:0006091~generation of precursor metabolites and energy,GO:0006412~translation,GO:0006518~peptide metabolic process,GO:0006807~nitrogen compound metabolic process,GO:0006810~transport,GO:0006811~ion transport,GO:0006820~anion transport,GO:0006835~dicarboxylic acid transport,GO:0006839~mitochondrial transport,GO:0006865~amino acid transport,GO:0008152~metabolic process,GO:0009058~biosynthetic pr…	GO:0005622~intracellular,GO:0005623~cell,GO:0005737~cytoplasm,GO:0005739~mitochondrion,GO:0005740~mitochondrial envelope,GO:0005743~mitochondrial inner membrane,GO:0016020~membrane,GO:0016021~integral component of membrane,GO:0019866~organelle inner membrane,GO:0031090~organelle membrane,GO:0031224~intrinsic component of membrane,GO:0031966~mitochondrial membrane,GO:0031967~organelle envelope,GO:…	GO:0003735~structural constituent of ribosome,GO:0005198~structural molecule activity,GO:0005215~transporter activity,GO:0005310~dicarboxylic acid transmembrane transporter activity,GO:0005313~L-glutamate transmembrane transporter activity,GO:0005342~organic acid transmembrane transporter activity,GO:0005488~binding,GO:0005509~calcium ion binding,GO:0008509~anion transmembrane transporter activit…	IPR002048:EF-hand domain,IPR002067:Mitochondrial carrier protein,IPR011992:EF-hand-like domain,IPR018108:Mitochondrial substrate/solute carrier,IPR018247:EF-Hand 1, calcium-binding site,IPR023395:Mitochondrial carrier domain,	0	PF00153:Mitochondrial carrier protein,	R-MMU-70263:R-MMU-70263,	Brain,Hippocampus,Olfactory epithelium,Pituitary,	Acetylation,Calcium,Complete proteome,Direct protein sequencing,Membrane,Metal-binding,Mitochondrion,Mitochondrion inner membrane,Proteomics identification,Reference proteome,Repeat,Transmembrane,Transmembrane helix,Transport,	calcium-binding region:1,calcium-binding region:2,calcium-binding region:3,chain:Calcium-binding mitochondrial carrier protein Aralar1,domain:EF-hand 1,domain:EF-hand 2,domain:EF-hand 3,domain:EF-hand 4,repeat:Solcar 1,repeat:Solcar 2,repeat:Solcar 3,transmembrane region,	0	13626:Slc25a12~solute carrier family 25 (mitochondrial carrier, Aralar), member 12,170484:Slc25a12~solute carrier family 25 (mitochondrial carrier, Aralar), member 12,260305:Slc25a12~solute carrier family 25 (mitochondrial carrier, Aralar), member 12,30011:Slc25a12~solute carrier family 25 (mitochondrial carrier, Aralar), member 12,6622:Slc25a12~solute carrier family 25 (mitochondrial carrier, Ar…	0	0	0	13385:discs, large homolog 4 (Drosophila)(Dlg4),14812:glutamate receptor, ionotropic, NMDA2B (epsilon 2)(Grin2b),22627:tyrosine 3-monooxygenase/tryptophan 5-monooxygenase activation protein, epsilon polypeptide(Ywhae),22631:tyrosine 3-monooxygenase/tryptophan 5-monooxygenase activation protein, zeta polypeptide(Ywhaz),260305:nephronophthisis 4 (juvenile) homolog (human)(Nphp4),54401:tyrosine 3-mo…	0	Neuron-optimal	NA	Neuron-central	Astrocyte-central
slc25a18	solute carrier family 25 (mitochondrial carrier), member 18(Slc25a18)	ENSMUSG00000004902	71803	NA	NA	NA	NA	0.0057774	GO:0006412~translation,GO:0006518~peptide metabolic process,GO:0006807~nitrogen compound metabolic process,GO:0006810~transport,GO:0008152~metabolic process,GO:0009058~biosynthetic process,GO:0009059~macromolecule biosynthetic process,GO:0009987~cellular process,GO:0010467~gene expression,GO:0019538~protein metabolic process,GO:0034641~cellular nitrogen compound metabolic process,GO:0034645~cellu…	GO:0005622~intracellular,GO:0005623~cell,GO:0005737~cytoplasm,GO:0005739~mitochondrion,GO:0005740~mitochondrial envelope,GO:0005743~mitochondrial inner membrane,GO:0016020~membrane,GO:0016021~integral component of membrane,GO:0019866~organelle inner membrane,GO:0031090~organelle membrane,GO:0031224~intrinsic component of membrane,GO:0031966~mitochondrial membrane,GO:0031967~organelle envelope,GO:…	GO:0003735~structural constituent of ribosome,GO:0005198~structural molecule activity,GO:0005215~transporter activity,GO:0015291~secondary active transmembrane transporter activity,GO:0015293~symporter activity,GO:0022804~active transmembrane transporter activity,GO:0022857~transmembrane transporter activity,	IPR002067:Mitochondrial carrier protein,IPR018108:Mitochondrial substrate/solute carrier,IPR023395:Mitochondrial carrier domain,	0	PF00153:Mitochondrial carrier protein,	0	Brain,Cerebellum,	Alternative splicing,Complete proteome,Membrane,Mitochondrion,Mitochondrion inner membrane,Phosphoprotein,Reference proteome,Repeat,Symport,Transmembrane,Transmembrane helix,Transport,	chain:Mitochondrial glutamate carrier 2,repeat:Solcar 1,repeat:Solcar 2,repeat:Solcar 3,splice variant,transmembrane region,	0	0	0	0	0	14804:glutamate receptor, ionotropic, delta 2(Grid2),	0	NA	NA	Neuron-central	Astrocyte-central
slc25a22	solute carrier family 25 (mitochondrial carrier, glutamate), member 22(Slc25a22)	ENSMUSG00000019082	68267	NA	NA	NA	NA	-0.0220705	GO:0006412~translation,GO:0006518~peptide metabolic process,GO:0006807~nitrogen compound metabolic process,GO:0006810~transport,GO:0006811~ion transport,GO:0006820~anion transport,GO:0006835~dicarboxylic acid transport,GO:0006865~amino acid transport,GO:0008152~metabolic process,GO:0009058~biosynthetic process,GO:0009059~macromolecule biosynthetic process,GO:0009987~cellular process,GO:0010467~ge…	GO:0005622~intracellular,GO:0005623~cell,GO:0005634~nucleus,GO:0005654~nucleoplasm,GO:0005737~cytoplasm,GO:0005739~mitochondrion,GO:0005740~mitochondrial envelope,GO:0005743~mitochondrial inner membrane,GO:0016020~membrane,GO:0016021~integral component of membrane,GO:0019866~organelle inner membrane,GO:0031090~organelle membrane,GO:0031224~intrinsic component of membrane,GO:0031966~mitochondrial …	GO:0003735~structural constituent of ribosome,GO:0005198~structural molecule activity,GO:0005215~transporter activity,GO:0005313~L-glutamate transmembrane transporter activity,GO:0005342~organic acid transmembrane transporter activity,GO:0008509~anion transmembrane transporter activity,GO:0008514~organic anion transmembrane transporter activity,GO:0015075~ion transmembrane transporter activity,GO…	IPR002067:Mitochondrial carrier protein,IPR018108:Mitochondrial substrate/solute carrier,IPR023395:Mitochondrial carrier domain,	0	PF00153:Mitochondrial carrier protein,	0	Brain,Diencephalon,Eye,Head,Medulla oblongata,Tongue,	Complete proteome,Direct protein sequencing,Membrane,Mitochondrion,Mitochondrion inner membrane,Proteomics identification,Reference proteome,Repeat,Symport,Transmembrane,Transmembrane helix,Transport,	chain:Mitochondrial glutamate carrier 1,repeat:Solcar 1,repeat:Solcar 2,repeat:Solcar 3,transmembrane region,	0	13626:Slc25a22~solute carrier family 25 (mitochondrial carrier, glutamate), member 22,6622:Slc25a22~solute carrier family 25 (mitochondrial carrier, glutamate), member 22,9619:Slc25a22~solute carrier family 25 (mitochondrial carrier, glutamate), member 22,	0	0	0	13385:discs, large homolog 4 (Drosophila)(Dlg4),14804:glutamate receptor, ionotropic, delta 2(Grid2),14812:glutamate receptor, ionotropic, NMDA2B (epsilon 2)(Grin2b),22627:tyrosine 3-monooxygenase/tryptophan 5-monooxygenase activation protein, epsilon polypeptide(Ywhae),54401:tyrosine 3-monooxygenase/tryptophan 5-monooxygenase activation protein, beta polypeptide(Ywhab),75985:RAB30, member RAS on…	0	NA	NA	Neuron-central	Astrocyte-central
slc25a27	solute carrier family 25, member 27(Slc25a27)	ENSMUSG00000023912	74011	NA	NA	NA	NA	0.00755152	GO:0006412~translation,GO:0006518~peptide metabolic process,GO:0006807~nitrogen compound metabolic process,GO:0006810~transport,GO:0006873~cellular ion homeostasis,GO:0006874~cellular calcium ion homeostasis,GO:0006875~cellular metal ion homeostasis,GO:0006915~apoptotic process,GO:0007275~multicellular organism development,GO:0007423~sensory organ development,GO:0008152~metabolic process,GO:00082…	GO:0005622~intracellular,GO:0005623~cell,GO:0005737~cytoplasm,GO:0005739~mitochondrion,GO:0016020~membrane,GO:0016021~integral component of membrane,GO:0031224~intrinsic component of membrane,GO:0036477~somatodendritic compartment,GO:0043025~neuronal cell body,GO:0043226~organelle,GO:0043227~membrane-bounded organelle,GO:0043229~intracellular organelle,GO:0043231~intracellular membrane-bounded or…	GO:0003735~structural constituent of ribosome,GO:0005198~structural molecule activity,	IPR018108:Mitochondrial substrate/solute carrier,IPR023395:Mitochondrial carrier domain,	0	PF00153:Mitochondrial carrier protein,	R-MMU-167826:R-MMU-167826,R-MMU-167827:R-MMU-167827,	Brain,Cortex,Stomach,	Complete proteome,Membrane,Proteomics identification,Reference proteome,Transmembrane,Transmembrane helix,Transport,	0	0	0	0	0	0	0	0	NA	NA	Neuron-central	Astrocyte-central
slc25a4	solute carrier family 25 (mitochondrial carrier, adenine nucleotide translocator), member 4(Slc25a4)	ENSMUSG00000031633	11739	NA	NA	NA	NA	-0.0236093	GO:0001558~regulation of cell growth,GO:0003008~system process,GO:0003012~muscle system process,GO:0003298~physiological muscle hypertrophy,GO:0003300~cardiac muscle hypertrophy,GO:0003301~physiological cardiac muscle hypertrophy,GO:0006412~translation,GO:0006518~peptide metabolic process,GO:0006807~nitrogen compound metabolic process,GO:0006810~transport,GO:0006811~ion transport,GO:0006812~catio…	GO:0005622~intracellular,GO:0005623~cell,GO:0005634~nucleus,GO:0005737~cytoplasm,GO:0005739~mitochondrion,GO:0005740~mitochondrial envelope,GO:0005741~mitochondrial outer membrane,GO:0005743~mitochondrial inner membrane,GO:0016020~membrane,GO:0016021~integral component of membrane,GO:0019866~organelle inner membrane,GO:0019867~outer membrane,GO:0031090~organelle membrane,GO:0031224~intrinsic comp…	GO:0003735~structural constituent of ribosome,GO:0005198~structural molecule activity,GO:0005215~transporter activity,GO:0005488~binding,GO:0005515~protein binding,GO:0019899~enzyme binding,	IPR002067:Mitochondrial carrier protein,IPR002113:Adenine nucleotide translocator 1,IPR018108:Mitochondrial substrate/solute carrier,IPR023395:Mitochondrial carrier domain,	mmu04020:Calcium signaling pathway,mmu04022:cGMP-PKG signaling pathway,mmu05012:Parkinson's disease,mmu05016:Huntington's disease,mmu05166:HTLV-I infection,	PF00153:Mitochondrial carrier protein,	R-MMU-422356:R-MMU-422356,	Brain,Brain cortex,Eye,Heart,Hippocampus,Medulla oblongata,Muscle,	Acetylation,Complete proteome,Direct protein sequencing,Isopeptide bond,Membrane,Mitochondrion,Mitochondrion inner membrane,Phosphoprotein,Reference proteome,Repeat,S-nitrosylation,Transmembrane,Transmembrane helix,Transport,	binding site:Nucleotide,chain:ADP/ATP translocase 1,cross-link:Glycyl lysine isopeptide (Lys-Gly) (interchain with G-Cter in ubiquitin),modified residue,repeat:Solcar 1,repeat:Solcar 2,repeat:Solcar 3,sequence conflict,short sequence motif:Substrate recognition,transmembrane region,	0	13626:Slc25a4~solute carrier family 25 (mitochondrial carrier, adenine nucleotide translocator), member 4,15450:Slc25a4~solute carrier family 25 (mitochondrial carrier, adenine nucleotide translocator), member 4,170484:Slc25a4~solute carrier family 25 (mitochondrial carrier, adenine nucleotide translocator), member 4,23568:Slc25a4~solute carrier family 25 (mitochondrial carrier, adenine nucleotid…	0	0	0	100043456:predicted gene 10681(Gm10681),13385:discs, large homolog 4 (Drosophila)(Dlg4),14056:enhancer of zeste 2 polycomb repressive complex 2 subunit(Ezh2),14121:fructose bisphosphatase 1(Fbp1),14804:glutamate receptor, ionotropic, delta 2(Grid2),14812:glutamate receptor, ionotropic, NMDA2B (epsilon 2)(Grin2b),15495:hydroxy-delta-5-steroid dehydrogenase, 3 beta- and steroid delta-isomerase 4(Hs…	11740:solute carrier family 25 (mitochondrial carrier, adenine nucleotide translocator), member 5(Slc25a5),11946:ATP synthase, H+ transporting, mitochondrial F1 complex, alpha subunit 1(Atp5a1),11947:ATP synthase, H+ transporting mitochondrial F1 complex, beta subunit(Atp5b),14121:fructose bisphosphatase 1(Fbp1),22334:voltage-dependent anion channel 2(Vdac2),	Neuron-optimal	NA	NA	NA
slc25a5	solute carrier family 25 (mitochondrial carrier, adenine nucleotide translocator), member 5(Slc25a5)	ENSMUSG00000016319	11740	NA	NA	NA	NA	-0.032267	GO:0006412~translation,GO:0006518~peptide metabolic process,GO:0006807~nitrogen compound metabolic process,GO:0006810~transport,GO:0006839~mitochondrial transport,GO:0006915~apoptotic process,GO:0006996~organelle organization,GO:0007005~mitochondrion organization,GO:0007006~mitochondrial membrane organization,GO:0007059~chromosome segregation,GO:0007154~cell communication,GO:0007165~signal transd…	GO:0005576~extracellular region,GO:0005622~intracellular,GO:0005623~cell,GO:0005634~nucleus,GO:0005737~cytoplasm,GO:0005739~mitochondrion,GO:0005740~mitochondrial envelope,GO:0005743~mitochondrial inner membrane,GO:0005759~mitochondrial matrix,GO:0005819~spindle,GO:0005856~cytoskeleton,GO:0009295~nucleoid,GO:0015630~microtubule cytoskeleton,GO:0016020~membrane,GO:0016021~integral component of mem…	GO:0003676~nucleic acid binding,GO:0003723~RNA binding,GO:0003735~structural constituent of ribosome,GO:0005198~structural molecule activity,GO:0005215~transporter activity,GO:0005488~binding,GO:0005515~protein binding,GO:0019899~enzyme binding,GO:0031625~ubiquitin protein ligase binding,GO:0044389~ubiquitin-like protein ligase binding,GO:0044822~poly(A) RNA binding,GO:0097159~organic cyclic comp…	IPR002067:Mitochondrial carrier protein,IPR002113:Adenine nucleotide translocator 1,IPR018108:Mitochondrial substrate/solute carrier,IPR023395:Mitochondrial carrier domain,	mmu04020:Calcium signaling pathway,mmu04022:cGMP-PKG signaling pathway,mmu05012:Parkinson's disease,mmu05016:Huntington's disease,mmu05166:HTLV-I infection,	PF00153:Mitochondrial carrier protein,	R-MMU-422356:R-MMU-422356,	Brain,Liver,Mammary gland,Skeletal muscle,Thymus,Whole body,	Acetylation,Chromosome partition,Complete proteome,Direct protein sequencing,Membrane,Methylation,Mitochondrion,Mitochondrion inner membrane,Reference proteome,Repeat,Transmembrane,Transmembrane helix,Transport,	binding site:Nucleotide,chain:ADP/ATP translocase 2,modified residue,repeat:Solcar 1,repeat:Solcar 2,repeat:Solcar 3,short sequence motif:Substrate recognition,transmembrane region,	0	13626:Slc25a5~solute carrier family 25 (mitochondrial carrier, adenine nucleotide translocator), member 5,15450:Slc25a5~solute carrier family 25 (mitochondrial carrier, adenine nucleotide translocator), member 5,170484:Slc25a5~solute carrier family 25 (mitochondrial carrier, adenine nucleotide translocator), member 5,22627:Slc25a5~solute carrier family 25 (mitochondrial carrier, adenine nucleotid…	0	26940:ECSIT signalling integrator(Ecsit),	0	100043456:predicted gene 10681(Gm10681),13385:discs, large homolog 4 (Drosophila)(Dlg4),14056:enhancer of zeste 2 polycomb repressive complex 2 subunit(Ezh2),14121:fructose bisphosphatase 1(Fbp1),14804:glutamate receptor, ionotropic, delta 2(Grid2),14812:glutamate receptor, ionotropic, NMDA2B (epsilon 2)(Grin2b),15495:hydroxy-delta-5-steroid dehydrogenase, 3 beta- and steroid delta-isomerase 4(Hs…	100041230:histone cluster 1, H4m(Hist1h4m),11739:solute carrier family 25 (mitochondrial carrier, adenine nucleotide translocator), member 4(Slc25a4),11946:ATP synthase, H+ transporting, mitochondrial F1 complex, alpha subunit 1(Atp5a1),11947:ATP synthase, H+ transporting mitochondrial F1 complex, beta subunit(Atp5b),14121:fructose bisphosphatase 1(Fbp1),14957:histone cluster 1, H1d(Hist1h1d),152…	Neuron-optimal	NA	NA	NA
SLC2A1	solute carrier family 2 (facilitated glucose transporter), member 1(Slc2a1)	ENSMUSG00000028645	20525	0.54085	0.647437	2.50299	NA	NA	GO:0006461~protein complex assembly,GO:0006810~transport,GO:0006811~ion transport,GO:0006820~anion transport,GO:0006950~response to stress,GO:0006970~response to osmotic stress,GO:0007154~cell communication,GO:0008643~carbohydrate transport,GO:0008645~hexose transport,GO:0009267~cellular response to starvation,GO:0009605~response to external stimulus,GO:0009628~response to abiotic stimulus,GO:000…	GO:0001939~female pronucleus,GO:0005576~extracellular region,GO:0005615~extracellular space,GO:0005622~intracellular,GO:0005623~cell,GO:0005634~nucleus,GO:0005737~cytoplasm,GO:0005829~cytosol,GO:0005856~cytoskeleton,GO:0005886~plasma membrane,GO:0005887~integral component of plasma membrane,GO:0005901~caveola,GO:0005911~cell-cell junction,GO:0005938~cell cortex,GO:0015629~actin cytoskeleton,GO:00…	GO:0005215~transporter activity,GO:0005355~glucose transmembrane transporter activity,GO:0005488~binding,GO:0005515~protein binding,GO:0015144~carbohydrate transmembrane transporter activity,GO:0015145~monosaccharide transmembrane transporter activity,GO:0015149~hexose transmembrane transporter activity,GO:0019899~enzyme binding,GO:0019900~kinase binding,GO:0022857~transmembrane transporter activ…	IPR002439:Glucose transporter, type 1 (GLUT1),IPR003663:Sugar/inositol transporter,IPR005828:General substrate transporter,IPR005829:Sugar transporter, conserved site,IPR020846:Major facilitator superfamily domain,	mmu04066:HIF-1 signaling pathway,mmu04911:Insulin secretion,mmu04919:Thyroid hormone signaling pathway,mmu04920:Adipocytokine signaling pathway,mmu04922:Glucagon signaling pathway,mmu04931:Insulin resistance,mmu04976:Bile secretion,mmu05166:HTLV-I infection,mmu05200:Pathways in cancer,mmu05211:Renal cell carcinoma,mmu05230:Central carbon metabolism in cancer,	PF00083:Sugar (and other) transporter,	R-MMU-196836:R-MMU-196836,R-MMU-422356:R-MMU-422356,R-MMU-428790:R-MMU-428790,R-MMU-5653890:R-MMU-5653890,R-MMU-70153:R-MMU-70153,	Brain,Embryo,Macrophage,	Acetylation,Cell membrane,Complete proteome,Glycoprotein,Membrane,Phosphoprotein,Proteomics identification,Reference proteome,Sugar transport,Transmembrane,Transmembrane helix,Transport,	chain:Solute carrier family 2, facilitated glucose transporter member 1,glycosylation site:N-linked (GlcNAc...),modified residue,region of interest:Defines substrate specificity,sequence conflict,topological domain:Cytoplasmic,topological domain:Extracellular,transmembrane region,	m_vitCBPathway:Vitamin C in the Brain,	13626:Slc2a1~solute carrier family 2 (facilitated glucose transporter), member 1,				13385:discs, large homolog 4 (Drosophila)(Dlg4),21937:tumor necrosis factor receptor superfamily, member 1a(Tnfrsf1a),		Neuron-optimal	Astrocyte-optimal	NA	NA
SLC2A10	solute carrier family 2 (facilitated glucose transporter), member 10(Slc2a10)	ENSMUSG00000027661	170441	NA	-0.408159	NA	-0.0134563	NA	GO:0006810~transport,GO:0008643~carbohydrate transport,GO:0008645~hexose transport,GO:0009987~cellular process,GO:0015749~monosaccharide transport,GO:0015758~glucose transport,GO:0034219~carbohydrate transmembrane transport,GO:0035428~hexose transmembrane transport,GO:0044699~single-organism process,GO:0044763~single-organism cellular process,GO:0044765~single-organism transport,GO:0046323~glucos…	GO:0005622~intracellular,GO:0005623~cell,GO:0005737~cytoplasm,GO:0005886~plasma membrane,GO:0005887~integral component of plasma membrane,GO:0012505~endomembrane system,GO:0016020~membrane,GO:0016021~integral component of membrane,GO:0031224~intrinsic component of membrane,GO:0031226~intrinsic component of plasma membrane,GO:0044424~intracellular part,GO:0044425~membrane part,GO:0044444~cytoplasm…	GO:0005215~transporter activity,GO:0005351~sugar:proton symporter activity,GO:0005355~glucose transmembrane transporter activity,GO:0005402~cation:sugar symporter activity,GO:0008324~cation transmembrane transporter activity,GO:0015075~ion transmembrane transporter activity,GO:0015144~carbohydrate transmembrane transporter activity,GO:0015145~monosaccharide transmembrane transporter activity,GO:0…	IPR003663:Sugar/inositol transporter,IPR005828:General substrate transporter,IPR005829:Sugar transporter, conserved site,IPR020846:Major facilitator superfamily domain,		PF00083:Sugar (and other) transporter,	R-MMU-428790:R-MMU-428790,	Brain,Heart,	Complete proteome,Cytoplasm,Membrane,Reference proteome,Sugar transport,Transmembrane,Transmembrane helix,Transport,	chain:Solute carrier family 2, facilitated glucose transporter member 10,topological domain:Cytoplasmic,topological domain:Extracellular,transmembrane region,								Neuron-optimal	Astrocyte-optimal	NA	NA
SLC2A6	solute carrier family 2 (facilitated glucose transporter), member 6(Slc2a6)	ENSMUSG00000036067	227659	NA	NA	-0.669577	NA	-0.0131963	GO:0006810~transport,GO:0008643~carbohydrate transport,GO:0008645~hexose transport,GO:0009987~cellular process,GO:0015749~monosaccharide transport,GO:0015758~glucose transport,GO:0034219~carbohydrate transmembrane transport,GO:0035428~hexose transmembrane transport,GO:0044699~single-organism process,GO:0044763~single-organism cellular process,GO:0044765~single-organism transport,GO:0046323~glucos…	GO:0005623~cell,GO:0005886~plasma membrane,GO:0005887~integral component of plasma membrane,GO:0016020~membrane,GO:0016021~integral component of membrane,GO:0031224~intrinsic component of membrane,GO:0031226~intrinsic component of plasma membrane,GO:0044425~membrane part,GO:0044459~plasma membrane part,GO:0044464~cell part,GO:0071944~cell periphery,	GO:0005215~transporter activity,GO:0005351~sugar:proton symporter activity,GO:0005355~glucose transmembrane transporter activity,GO:0005402~cation:sugar symporter activity,GO:0008324~cation transmembrane transporter activity,GO:0015075~ion transmembrane transporter activity,GO:0015144~carbohydrate transmembrane transporter activity,GO:0015145~monosaccharide transmembrane transporter activity,GO:0…	IPR003663:Sugar/inositol transporter,IPR005828:General substrate transporter,IPR005829:Sugar transporter, conserved site,IPR020846:Major facilitator superfamily domain,	0	PF00083:Sugar (and other) transporter,	R-MMU-428790:R-MMU-428790,	Bone marrow,Brain,Mammary gland,	Complete proteome,Membrane,Proteomics identification,Reference proteome,Sugar transport,Transmembrane,Transmembrane helix,Transport,	0	0	0	0	0	0	0	0	Neuron-optimal	Astrocyte-optimal	NA	NA
slc38a3	solute carrier family 38, member 3(Slc38a3)	ENSMUSG00000010064	76257	NA	NA	NA	-0.0281154	NA	GO:0000003~reproduction,GO:0006139~nucleobase-containing compound metabolic process,GO:0006351~transcription, DNA-templated,GO:0006355~regulation of transcription, DNA-templated,GO:0006357~regulation of transcription from RNA polymerase II promoter,GO:0006366~transcription from RNA polymerase II promoter,GO:0006725~cellular aromatic compound metabolic process,GO:0006807~nitrogen compound metaboli…	GO:0005623~cell,GO:0005886~plasma membrane,GO:0005887~integral component of plasma membrane,GO:0016020~membrane,GO:0016021~integral component of membrane,GO:0016323~basolateral plasma membrane,GO:0031224~intrinsic component of membrane,GO:0031226~intrinsic component of plasma membrane,GO:0044425~membrane part,GO:0044459~plasma membrane part,GO:0044464~cell part,GO:0071944~cell periphery,GO:009859…	GO:0005215~transporter activity,GO:0005290~L-histidine transmembrane transporter activity,GO:0005342~organic acid transmembrane transporter activity,GO:0015171~amino acid transmembrane transporter activity,GO:0015174~basic amino acid transmembrane transporter activity,GO:0015175~neutral amino acid transmembrane transporter activity,GO:0015179~L-amino acid transmembrane transporter activity,GO:001…	IPR013057:Amino acid transporter, transmembrane,	mmu04724:Glutamatergic synapse,mmu04727:GABAergic synapse,mmu04964:Proximal tubule bicarbonate reclamation,	PF01490:Transmembrane amino acid transporter protein,	R-MMU-352230:R-MMU-352230,	Brain,Embryo,Kidney,Liver,Retina,	Amino-acid transport,Antiport,Cell membrane,Complete proteome,Glycoprotein,Ion transport,Membrane,Proteomics identification,Reference proteome,Sodium,Sodium transport,Symport,Transmembrane,Transmembrane helix,Transport,	chain:Sodium-coupled neutral amino acid transporter 3,glycosylation site:N-linked (GlcNAc...),modified residue,sequence conflict,transmembrane region,	0	18753:Prkcd~protein kinase C, delta,	0	0	0	101502:hydroxy-delta-5-steroid dehydrogenase, 3 beta- and steroid delta-isomerase 7(Hsd3b7),22627:tyrosine 3-monooxygenase/tryptophan 5-monooxygenase activation protein, epsilon polypeptide(Ywhae),	0	NA	Astrocyte-optimal	NA	NA
SLC3A2	solute carrier family 3 (activators of dibasic and neutral amino acid transport), member 2(Slc3a2)	ENSMUSG00000010095	17254	0.381222	0.884949	1.03464	NA	-0.00864643	GO:0005975~carbohydrate metabolic process,GO:0006810~transport,GO:0006811~ion transport,GO:0006820~anion transport,GO:0006865~amino acid transport,GO:0007155~cell adhesion,GO:0008152~metabolic process,GO:0010033~response to organic substance,GO:0014070~response to organic cyclic compound,GO:0015711~organic anion transport,GO:0015801~aromatic amino acid transport,GO:0015803~branched-chain amino ac…	GO:0005576~extracellular region,GO:0005622~intracellular,GO:0005623~cell,GO:0005634~nucleus,GO:0005737~cytoplasm,GO:0005886~plasma membrane,GO:0005911~cell-cell junction,GO:0005912~adherens junction,GO:0005913~cell-cell adherens junction,GO:0009986~cell surface,GO:0016020~membrane,GO:0016021~integral component of membrane,GO:0016023~cytoplasmic, membrane-bounded vesicle,GO:0016324~apical plasma m…	GO:0003676~nucleic acid binding,GO:0003723~RNA binding,GO:0003725~double-stranded RNA binding,GO:0003824~catalytic activity,GO:0005215~transporter activity,GO:0005342~organic acid transmembrane transporter activity,GO:0005488~binding,GO:0005515~protein binding,GO:0015171~amino acid transmembrane transporter activity,GO:0015175~neutral amino acid transmembrane transporter activity,GO:0022857~trans…	IPR006047:Glycosyl hydrolase, family 13, catalytic domain,IPR013780:Glycosyl hydrolase, family 13, all-beta,IPR013781:Glycoside hydrolase, catalytic domain,IPR015902:Glycoside hydrolase, family 13,IPR017853:Glycoside hydrolase, superfamily,	mmu04974:Protein digestion and absorption,	PF00128:Alpha amylase, catalytic domain,	R-MMU-210991:R-MMU-210991,R-MMU-352230:R-MMU-352230,	Activated spleen,Brain,Kidney,Macrophage,Pre-B cell,Testis,	Alternative splicing,Amino-acid transport,Cell membrane,Complete proteome,Direct protein sequencing,Disulfide bond,Glycoprotein,Isopeptide bond,Membrane,Phosphoprotein,Proteomics identification,Reference proteome,Signal-anchor,Transmembrane,Transmembrane helix,Transport,Ubl conjugation,	chain:4F2 cell-surface antigen heavy chain,cross-link:Glycyl lysine isopeptide (Lys-Gly) (interchain with G-Cter in ubiquitin),disulfide bond,glycosylation site:N-linked (GlcNAc...),modified residue,mutagenesis site,topological domain:Cytoplasmic,topological domain:Extracellular,transmembrane region,						100043456:predicted gene 10681(Gm10681),15495:hydroxy-delta-5-steroid dehydrogenase, 3 beta- and steroid delta-isomerase 4(Hsd3b4),22627:tyrosine 3-monooxygenase/tryptophan 5-monooxygenase activation protein, epsilon polypeptide(Ywhae),22631:tyrosine 3-monooxygenase/tryptophan 5-monooxygenase activation protein, zeta polypeptide(Ywhaz),		NA	Astrocyte-optimal	NA	NA
SLC7A5	solute carrier family 7 (cationic amino acid transporter, y+ system), member 5(Slc7a5)	ENSMUSG00000040010	20539	0.798057	1.82945	0.554944	NA	NA	GO:0003333~amino acid transmembrane transport,GO:0006810~transport,GO:0006811~ion transport,GO:0006820~anion transport,GO:0006865~amino acid transport,GO:0007275~multicellular organism development,GO:0007399~nervous system development,GO:0009987~cellular process,GO:0015711~organic anion transport,GO:0015804~neutral amino acid transport,GO:0015807~L-amino acid transport,GO:0015849~organic acid tra…	GO:0005576~extracellular region,GO:0005622~intracellular,GO:0005623~cell,GO:0005737~cytoplasm,GO:0005829~cytosol,GO:0005886~plasma membrane,GO:0005887~integral component of plasma membrane,GO:0016020~membrane,GO:0016021~integral component of membrane,GO:0016324~apical plasma membrane,GO:0031224~intrinsic component of membrane,GO:0031226~intrinsic component of plasma membrane,GO:0031982~vesicle,GO…	GO:0005215~transporter activity,GO:0005342~organic acid transmembrane transporter activity,GO:0015171~amino acid transmembrane transporter activity,GO:0015175~neutral amino acid transmembrane transporter activity,GO:0015179~L-amino acid transmembrane transporter activity,GO:0015291~secondary active transmembrane transporter activity,GO:0015297~antiporter activity,GO:0022804~active transmembrane t…	IPR002293:Amino acid/polyamine transporter I,IPR004760:L-type amino acid transporter,	mmu05230:Central carbon metabolism in cancer,	PF13520:Amino acid permease,	R-MMU-210991:R-MMU-210991,R-MMU-352230:R-MMU-352230,	Heart,Mammary tumor metastatized to lung. Tumor arose spontaneously,Salivary gland,	Amino-acid transport,Cell membrane,Complete proteome,Cytoplasm,Developmental protein,Differentiation,Disulfide bond,Glycoprotein,Membrane,Neurogenesis,Phosphoprotein,Reference proteome,Transmembrane,Transmembrane helix,Transport,	chain:Large neutral amino acids transporter small subunit 1,glycosylation site:N-linked (GlcNAc...),modified residue,sequence conflict,transmembrane region,			Amino acid transport and metabolism,					NA	Astrocyte-optimal	NA	NA
sod1	superoxide dismutase 1, soluble(Sod1)	ENSMUSG00000022982	20655	NA	NA	NA	NA	-0.00835001	GO:0000003~reproduction,GO:0000165~MAPK cascade,GO:0000187~activation of MAPK activity,GO:0000302~response to reactive oxygen species,GO:0000303~response to superoxide,GO:0000305~response to oxygen radical,GO:0000902~cell morphogenesis,GO:0000904~cell morphogenesis involved in differentiation,GO:0001541~ovarian follicle development,GO:0001816~cytokine production,GO:0001817~regulation of cytokine …	GO:0000323~lytic vacuole,GO:0005576~extracellular region,GO:0005615~extracellular space,GO:0005622~intracellular,GO:0005623~cell,GO:0005634~nucleus,GO:0005654~nucleoplasm,GO:0005737~cytoplasm,GO:0005739~mitochondrion,GO:0005740~mitochondrial envelope,GO:0005758~mitochondrial intermembrane space,GO:0005764~lysosome,GO:0005773~vacuole,GO:0005777~peroxisome,GO:0005829~cytosol,GO:0005886~plasma membr…	GO:0003824~catalytic activity,GO:0004784~superoxide dismutase activity,GO:0005488~binding,GO:0005507~copper ion binding,GO:0005515~protein binding,GO:0008270~zinc ion binding,GO:0016209~antioxidant activity,GO:0016491~oxidoreductase activity,GO:0016721~oxidoreductase activity, acting on superoxide radicals as acceptor,GO:0017016~Ras GTPase binding,GO:0017048~Rho GTPase binding,GO:0019899~enzyme b…	IPR001424:Superoxide dismutase, copper/zinc binding domain,IPR018152:Superoxide dismutase, copper/zinc, binding site,IPR024134:Superoxide dismutase (Cu/Zn) / chaperones,	mmu04146:Peroxisome,mmu05014:Amyotrophic lateral sclerosis (ALS),mmu05016:Huntington's disease,mmu05020:Prion diseases,	PF00080:Copper/zinc superoxide dismutase (SODC),	R-MMU-114608:R-MMU-114608,R-MMU-3299685:R-MMU-3299685,	Hippocampus,Liver,Lung,Mammary gland,Ovary,Retina,Urinary bladder,Uterus,	3D-structure,Acetylation,Antioxidant,Complete proteome,Copper,Cytoplasm,Direct protein sequencing,Disulfide bond,Lipoprotein,Metal-binding,Nucleus,Oxidoreductase,Palmitate,Phosphoprotein,Reference proteome,Zinc,	chain:Superoxide dismutase [Cu-Zn],disulfide bond,metal ion-binding site:Copper; catalytic,metal ion-binding site:Zinc; structural,modified residue,sequence conflict,	m_freePathway:Free Radical Induced Apoptosis,m_LongevityPathway:The IGF-1 Receptor and Longevity,	10016:PDCD6~programmed cell death 6,10999:SLC27A4~solute carrier family 27 member 4,11051:NUDT21~nudix hydrolase 21,11060:WWP2~WW domain containing E3 ubiquitin protein ligase 2,124245:ZC3H18~zinc finger CCCH-type containing 18,16348:Sod1~superoxide dismutase 1, soluble,18412:Sod1~superoxide dismutase 1, soluble,18412:Sqstm1~sequestosome 1,20655:Sod1~superoxide dismutase 1, soluble,22800:RRAS2~re…	0	0	1.15.1.1,	100043456:predicted gene 10681(Gm10681),101502:hydroxy-delta-5-steroid dehydrogenase, 3 beta- and steroid delta-isomerase 7(Hsd3b7),13058:cytochrome b-245, beta polypeptide(Cybb),13385:discs, large homolog 4 (Drosophila)(Dlg4),15495:hydroxy-delta-5-steroid dehydrogenase, 3 beta- and steroid delta-isomerase 4(Hsd3b4),16348:inversin(Invs),16531:potassium large conductance calcium-activated channel,…	100041194:AHNAK nucleoprotein 2(Ahnak2),100043813:ribosomal protein S27, retrogene(Rps27rt),100043876:predicted gene 4705(Gm4705),100609:NOL1/NOP2/Sun domain family, member 5(Nsun5),100678:phosphoserine phosphatase(Psph),100763:ubiquitin protein ligase E3C(Ube3c),100862468:NHP2-like protein 1(LOC100862468),101314:BRICK1, SCAR/WAVE actin-nucleating complex subunit(Brk1),102595:pleckstrin homology …	NA	NA	Neuron-central	Astrocyte-central
sod2	superoxide dismutase 2, mitochondrial(Sod2)	ENSMUSG00000006818	20656	NA	NA	NA	0.00544969	-0.0060007	GO:0000302~response to reactive oxygen species,GO:0000303~response to superoxide,GO:0000305~response to oxygen radical,GO:0001101~response to acid chemical,GO:0001306~age-dependent response to oxidative stress,GO:0001315~age-dependent response to reactive oxygen species,GO:0001666~response to hypoxia,GO:0001836~release of cytochrome c from mitochondria,GO:0001889~liver development,GO:0001976~neur…	GO:0005576~extracellular region,GO:0005622~intracellular,GO:0005623~cell,GO:0005737~cytoplasm,GO:0005739~mitochondrion,GO:0005740~mitochondrial envelope,GO:0005743~mitochondrial inner membrane,GO:0005759~mitochondrial matrix,GO:0009295~nucleoid,GO:0016020~membrane,GO:0019866~organelle inner membrane,GO:0031090~organelle membrane,GO:0031966~mitochondrial membrane,GO:0031967~organelle envelope,GO:0…	GO:0003676~nucleic acid binding,GO:0003677~DNA binding,GO:0003824~catalytic activity,GO:0004784~superoxide dismutase activity,GO:0005488~binding,GO:0005515~protein binding,GO:0016209~antioxidant activity,GO:0016491~oxidoreductase activity,GO:0016721~oxidoreductase activity, acting on superoxide radicals as acceptor,GO:0019825~oxygen binding,GO:0019899~enzyme binding,GO:0030145~manganese ion bindi…	IPR001189:Manganese/iron superoxide dismutase,IPR019831:Manganese/iron superoxide dismutase, N-terminal,IPR019832:Manganese/iron superoxide dismutase, C-terminal,IPR019833:Manganese/iron superoxide dismutase, binding site,	mmu04068:FoxO signaling pathway,mmu04146:Peroxisome,mmu05016:Huntington's disease,	PF00081:Iron/manganese superoxide dismutases, alpha-hairpin domain,PF02777:Iron/manganese superoxide dismutases, C-terminal domain,	R-MMU-3299685:R-MMU-3299685,	Bone marrow,Brain,Embryo,Heart,Hippocampus,Kidney,Liver,Mammary gland,Mullerian duct includes surrounding region,Placenta,	Acetylation,Complete proteome,Direct protein sequencing,Manganese,Metal-binding,Mitochondrion,Nitration,Oxidoreductase,Reference proteome,Transit peptide,	chain:Superoxide dismutase [Mn], mitochondrial,metal ion-binding site:Manganese,modified residue,sequence conflict,transit peptide:Mitochondrion,	m_eponfkbPathway:Erythropoietin mediated neuroprotection through NF-kB,m_LongevityPathway:The IGF-1 Receptor and Longevity,	12015:Sod2~superoxide dismutase 2, mitochondrial,16531:Sod2~superoxide dismutase 2, mitochondrial,	Inorganic ion transport and metabolism,	0	1.15.1.1,	100043456:predicted gene 10681(Gm10681),15495:hydroxy-delta-5-steroid dehydrogenase, 3 beta- and steroid delta-isomerase 4(Hsd3b4),16531:potassium large conductance calcium-activated channel, subfamily M, alpha member 1(Kcnma1),18975:polymerase (DNA directed), gamma(Polg),22059:transformation related protein 53(Trp53),22627:tyrosine 3-monooxygenase/tryptophan 5-monooxygenase activation protein, e…	0	NA	NA	Neuron-central	Astrocyte-central
SOD3	superoxide dismutase 3, extracellular(Sod3)	ENSMUSG00000072941	20657	1.28557	2.39124	NA	0.0105135	0.0137208	GO:0000302~response to reactive oxygen species,GO:0001666~response to hypoxia,GO:0006801~superoxide metabolic process,GO:0006950~response to stress,GO:0006979~response to oxidative stress,GO:0008152~metabolic process,GO:0009628~response to abiotic stimulus,GO:0009987~cellular process,GO:0010035~response to inorganic substance,GO:0010038~response to metal ion,GO:0036293~response to decreased oxyge…	GO:0005576~extracellular region,GO:0005615~extracellular space,GO:0005622~intracellular,GO:0005623~cell,GO:0005634~nucleus,GO:0005737~cytoplasm,GO:0005794~Golgi apparatus,GO:0005796~Golgi lumen,GO:0005802~trans-Golgi network,GO:0012505~endomembrane system,GO:0031012~extracellular matrix,GO:0031974~membrane-enclosed lumen,GO:0031982~vesicle,GO:0031984~organelle subcompartment,GO:0031988~membrane-b…	GO:0003824~catalytic activity,GO:0004784~superoxide dismutase activity,GO:0005488~binding,GO:0005507~copper ion binding,GO:0005515~protein binding,GO:0008270~zinc ion binding,GO:0016209~antioxidant activity,GO:0016491~oxidoreductase activity,GO:0016721~oxidoreductase activity, acting on superoxide radicals as acceptor,GO:0043167~ion binding,GO:0043169~cation binding,GO:0046872~metal ion binding,G…	IPR001424:Superoxide dismutase, copper/zinc binding domain,IPR018152:Superoxide dismutase, copper/zinc, binding site,IPR024134:Superoxide dismutase (Cu/Zn) / chaperones,		PF00080:Copper/zinc superoxide dismutase (SODC),	R-MMU-3299685:R-MMU-3299685,	Atherosclerotic vessel,Kidney,Liver,Lung,Mammary gland,Mammary tumor metastatized to lung. Tumor arose spontaneously,	3D-structure,Antioxidant,Complete proteome,Copper,Direct protein sequencing,Disulfide bond,Glycoprotein,Metal-binding,Oxidoreductase,Reference proteome,Secreted,Signal,Zinc,	chain:Extracellular superoxide dismutase [Cu- Zn],disulfide bond,glycosylation site:N-linked (GlcNAc...),metal ion-binding site:Copper; catalytic,metal ion-binding site:Zinc; structural,signal peptide,	m_LongevityPathway:The IGF-1 Receptor and Longevity,	11977:Atp7a~ATPase, Cu++ transporting, alpha polypeptide,			1.15.1.1,	22627:tyrosine 3-monooxygenase/tryptophan 5-monooxygenase activation protein, epsilon polypeptide(Ywhae),		NA	NA	Neuron-central	Astrocyte-central
tk2	thymidine kinase 2, mitochondrial(Tk2)	ENSMUSG00000035824	57813	NA	NA	NA	NA	-0.0135056	GO:0000002~mitochondrial genome maintenance,GO:0006139~nucleobase-containing compound metabolic process,GO:0006213~pyrimidine nucleoside metabolic process,GO:0006259~DNA metabolic process,GO:0006260~DNA replication,GO:0006261~DNA-dependent DNA replication,GO:0006264~mitochondrial DNA replication,GO:0006725~cellular aromatic compound metabolic process,GO:0006753~nucleoside phosphate metabolic proc…	GO:0005622~intracellular,GO:0005623~cell,GO:0005737~cytoplasm,GO:0005739~mitochondrion,GO:0005740~mitochondrial envelope,GO:0005743~mitochondrial inner membrane,GO:0016020~membrane,GO:0019866~organelle inner membrane,GO:0031090~organelle membrane,GO:0031966~mitochondrial membrane,GO:0031967~organelle envelope,GO:0031975~envelope,GO:0043226~organelle,GO:0043227~membrane-bounded organelle,GO:004322…	GO:0000166~nucleotide binding,GO:0001882~nucleoside binding,GO:0001883~purine nucleoside binding,GO:0003824~catalytic activity,GO:0004137~deoxycytidine kinase activity,GO:0004797~thymidine kinase activity,GO:0005488~binding,GO:0005524~ATP binding,GO:0016301~kinase activity,GO:0016740~transferase activity,GO:0016772~transferase activity, transferring phosphorus-containing groups,GO:0017076~purine …	IPR002624:Deoxynucleoside kinase,IPR027417:P-loop containing nucleoside triphosphate hydrolase,	mmu00240:Pyrimidine metabolism,mmu00983:Drug metabolism - other enzymes,mmu01100:Metabolic pathways,	PF01712:Deoxynucleoside kinase,	R-MMU-73614:R-MMU-73614,	Brain,Eyeball,Liver,	ATP-binding,Complete proteome,DNA synthesis,Kinase,Mitochondrion,Nucleotide-binding,Proteomics identification,Reference proteome,Transferase,Transit peptide,	chain:Thymidine kinase 2, mitochondrial,nucleotide phosphate-binding region:ATP,sequence conflict,transit peptide:Mitochondrion,	0	0	0	0	2.7.1.21,	0	0	NA	NA	Neuron-central	Astrocyte-central
TST	thiosulfate sulfurtransferase, mitochondrial(Tst)	ENSMUSG00000044986	22117	0.382129	NA	-1.40682	NA	NA	GO:0006403~RNA localization,GO:0006810~transport,GO:0006839~mitochondrial transport,GO:0009888~tissue development,GO:0009987~cellular process,GO:0015931~nucleobase-containing compound transport,GO:0030154~cell differentiation,GO:0030855~epithelial cell differentiation,GO:0032502~developmental process,GO:0033036~macromolecule localization,GO:0035927~RNA import into mitochondrion,GO:0035928~rRNA im…	GO:0005576~extracellular region,GO:0005615~extracellular space,GO:0005622~intracellular,GO:0005623~cell,GO:0005737~cytoplasm,GO:0005739~mitochondrion,GO:0005740~mitochondrial envelope,GO:0005743~mitochondrial inner membrane,GO:0005759~mitochondrial matrix,GO:0016020~membrane,GO:0019866~organelle inner membrane,GO:0031090~organelle membrane,GO:0031966~mitochondrial membrane,GO:0031967~organelle en…	GO:0003676~nucleic acid binding,GO:0003723~RNA binding,GO:0003824~catalytic activity,GO:0004792~thiosulfate sulfurtransferase activity,GO:0005488~binding,GO:0008097~5S rRNA binding,GO:0016740~transferase activity,GO:0016782~transferase activity, transferring sulfur-containing groups,GO:0016783~sulfurtransferase activity,GO:0019843~rRNA binding,GO:0097159~organic cyclic compound binding,GO:1901363…	IPR001307:Thiosulphate sulfurtransferase, conserved site,IPR001763:Rhodanese-like domain,	mmu00270:Cysteine and methionine metabolism,mmu00920:Sulfur metabolism,mmu01100:Metabolic pathways,mmu04122:Sulfur relay system,	PF00581:Rhodanese-like domain,		Liver,Mammary gland,Whole body,	Acetylation,Complete proteome,Glycoprotein,Mitochondrion,Phosphoprotein,Reference proteome,Repeat,RNA-binding,Transferase,	active site:Cysteine persulfide intermediate,binding site:Substrate,chain:Thiosulfate sulfurtransferase,domain:Rhodanese 1,domain:Rhodanese 2,modified residue,region of interest:Hinge,			Inorganic ion transport and metabolism,		2.8.1.1,	100043456:predicted gene 10681(Gm10681),15495:hydroxy-delta-5-steroid dehydrogenase, 3 beta- and steroid delta-isomerase 4(Hsd3b4),22627:tyrosine 3-monooxygenase/tryptophan 5-monooxygenase activation protein, epsilon polypeptide(Ywhae),		NA	NA	Neuron-central	Astrocyte-central
TXNRD1	thioredoxin reductase 1(Txnrd1)	ENSMUSG00000020250	50493	NA	0.469302	0.142684	NA	0.0116753	GO:0001704~formation of primary germ layer,GO:0001707~mesoderm formation,GO:0006082~organic acid metabolic process,GO:0006139~nucleobase-containing compound metabolic process,GO:0006461~protein complex assembly,GO:0006725~cellular aromatic compound metabolic process,GO:0006732~coenzyme metabolic process,GO:0006733~oxidoreduction coenzyme metabolic process,GO:0006739~NADP metabolic process,GO:0006…	GO:0005576~extracellular region,GO:0005622~intracellular,GO:0005623~cell,GO:0005634~nucleus,GO:0005654~nucleoplasm,GO:0005730~nucleolus,GO:0005737~cytoplasm,GO:0005739~mitochondrion,GO:0005829~cytosol,GO:0031974~membrane-enclosed lumen,GO:0031981~nuclear lumen,GO:0031982~vesicle,GO:0031988~membrane-bounded vesicle,GO:0036477~somatodendritic compartment,GO:0043025~neuronal cell body,GO:0043226~org…	GO:0000166~nucleotide binding,GO:0003824~catalytic activity,GO:0004791~thioredoxin-disulfide reductase activity,GO:0005488~binding,GO:0005515~protein binding,GO:0016174~NAD(P)H oxidase activity,GO:0016209~antioxidant activity,GO:0016491~oxidoreductase activity,GO:0016651~oxidoreductase activity, acting on NAD(P)H,GO:0016667~oxidoreductase activity, acting on a sulfur group of donors,GO:0016668~ox…	IPR004099:Pyridine nucleotide-disulphide oxidoreductase, dimerisation,IPR006338:Thioredoxin/glutathione reductase selenoprotein,IPR012999:Pyridine nucleotide-disulphide oxidoreductase, class I, active site,IPR016156:FAD/NAD-linked reductase, dimerisation,IPR023753:Pyridine nucleotide-disulphide oxidoreductase, FAD/NAD(P)-binding domain,	mmu00450:Selenocompound metabolism,	PF02852:Pyridine nucleotide-disulphide oxidoreductase, dimerisation domain,PF07992:Pyridine nucleotide-disulphide oxidoreductase,	R-MMU-3299685:R-MMU-3299685,R-MMU-499943:R-MMU-499943,R-MMU-5263617:R-MMU-5263617,R-MMU-5628897:R-MMU-5628897,	Embryo,Mammary tumor,Thymus,	Alternative splicing,Complete proteome,Cytoplasm,Disulfide bond,FAD,Flavoprotein,NADP,Oxidoreductase,Phosphoprotein,Redox-active center,Reference proteome,Selenocysteine,	active site:Proton acceptor,chain:Thioredoxin reductase 1, cytoplasmic,compositionally biased region:Pro-rich,cross-link:Cysteinyl-selenocysteine (Cys-Sec),disulfide bond,modified residue,nucleotide phosphate-binding region:FAD,sequence conflict,splice variant,					1.8.1.9,	12389:caveolin 1, caveolae protein(Cav1),22627:tyrosine 3-monooxygenase/tryptophan 5-monooxygenase activation protein, epsilon polypeptide(Ywhae),66171:6-phosphogluconolactonase(Pgls),	12389:caveolin 1, caveolae protein(Cav1),	NA	NA	Neuron-central	NA
TXNRD2	thioredoxin reductase 2(Txnrd2)	ENSMUSG00000075704	26462	NA	NA	-0.48503	NA	NA	GO:0000302~response to reactive oxygen species,GO:0000305~response to oxygen radical,GO:0002376~immune system process,GO:0002520~immune system development,GO:0006950~response to stress,GO:0006979~response to oxidative stress,GO:0007275~multicellular organism development,GO:0007507~heart development,GO:0008152~metabolic process,GO:0009987~cellular process,GO:0010035~response to inorganic substance…	GO:0005622~intracellular,GO:0005623~cell,GO:0005737~cytoplasm,GO:0005739~mitochondrion,GO:0030424~axon,GO:0030425~dendrite,GO:0036477~somatodendritic compartment,GO:0042995~cell projection,GO:0043005~neuron projection,GO:0043025~neuronal cell body,GO:0043226~organelle,GO:0043227~membrane-bounded organelle,GO:0043229~intracellular organelle,GO:0043231~intracellular membrane-bounded organelle,GO:00…	GO:0000166~nucleotide binding,GO:0003824~catalytic activity,GO:0004791~thioredoxin-disulfide reductase activity,GO:0005488~binding,GO:0005515~protein binding,GO:0016209~antioxidant activity,GO:0016491~oxidoreductase activity,GO:0016651~oxidoreductase activity, acting on NAD(P)H,GO:0016667~oxidoreductase activity, acting on a sulfur group of donors,GO:0016668~oxidoreductase activity, acting on a s…	IPR004099:Pyridine nucleotide-disulphide oxidoreductase, dimerisation,IPR006338:Thioredoxin/glutathione reductase selenoprotein,IPR012999:Pyridine nucleotide-disulphide oxidoreductase, class I, active site,IPR016156:FAD/NAD-linked reductase, dimerisation,IPR023753:Pyridine nucleotide-disulphide oxidoreductase, FAD/NAD(P)-binding domain,	mmu00450:Selenocompound metabolism,	PF02852:Pyridine nucleotide-disulphide oxidoreductase, dimerisation domain,PF07992:Pyridine nucleotide-disulphide oxidoreductase,	R-MMU-3299685:R-MMU-3299685,	Limb,Liver,Mammary tumor,Small intestine,Thymocyte,	3D-structure,Alternative splicing,Complete proteome,Direct protein sequencing,Disulfide bond,FAD,Flavoprotein,Mitochondrion,NADP,Oxidoreductase,Proteomics identification,Redox-active center,Reference proteome,Selenocysteine,Transit peptide,	active site:Proton acceptor,chain:Thioredoxin reductase 2, mitochondrial,cross-link:Cysteinyl-selenocysteine (Cys-Sec),disulfide bond,helix,modified residue,nucleotide phosphate-binding region:FAD,sequence conflict,splice variant,strand,transit peptide:Mitochondrion,turn,	0	0	0	0	1.8.1.9,	100043456:predicted gene 10681(Gm10681),15495:hydroxy-delta-5-steroid dehydrogenase, 3 beta- and steroid delta-isomerase 4(Hsd3b4),22627:tyrosine 3-monooxygenase/tryptophan 5-monooxygenase activation protein, epsilon polypeptide(Ywhae),23983:poly(rC) binding protein 1(Pcbp1),	0	NA	NA	Neuron-central	NA

## Sheet: Astrocyte neurotransmission
Supplementary Table 4. Differential hub genes in the astrocyte during neurotransmission, including reported fold-change for both databases and cell types (Hasel et al., 2017; Tabula Muris Consortium, 2020).
Official gene symbol	Gene Name	Ensembl Gene ID	Entrez Gene ID	Astrocyte neurotransmission (log2fold-change)	Astrocyte neurotransmission TBOA (log2fold-change)	Neuron neurotransmission (log2fold-change)	Astrocyte aging (age_coefficient)	Neuron aging (age_coefficient)	GOTERM_BP_ALL	GOTERM_CC_ALL	GOTERM_MF_ALL	INTERPRO	KEGG_PATHWAY	PFAM	REACTOME_PATHWAY	UP_TISSUE	UP_KEYWORDS	UP_SEQ_FEATURE	BIOCARTA	BIOGRID_INTERACTION	COG_ONTOLOGY	DIP	EC_NUMBER	INTACT	MINT	Neuron optimal genes	Astrocyte optimal genes	Neuron central genes	Astrocyte central genes
TST	thiosulfate sulfurtransferase, mitochondrial(Tst)	ENSMUSG00000044986	22117	0.382129	NA	-1.40682	NA	NA	GO:0006403~RNA localization,GO:0006810~transport,GO:0006839~mitochondrial transport,GO:0009888~tissue development,GO:0009987~cellular process,GO:0015931~nucleobase-containing compound transport,GO:0030154~cell differentiation,GO:0030855~epithelial cell differentiation,GO:0032502~developmental process,GO:0033036~macromolecule localization,GO:0035927~RNA import into mitochondrion,GO:0035928~rRNA im…	GO:0005576~extracellular region,GO:0005615~extracellular space,GO:0005622~intracellular,GO:0005623~cell,GO:0005737~cytoplasm,GO:0005739~mitochondrion,GO:0005740~mitochondrial envelope,GO:0005743~mitochondrial inner membrane,GO:0005759~mitochondrial matrix,GO:0016020~membrane,GO:0019866~organelle inner membrane,GO:0031090~organelle membrane,GO:0031966~mitochondrial membrane,GO:0031967~organelle en…	GO:0003676~nucleic acid binding,GO:0003723~RNA binding,GO:0003824~catalytic activity,GO:0004792~thiosulfate sulfurtransferase activity,GO:0005488~binding,GO:0008097~5S rRNA binding,GO:0016740~transferase activity,GO:0016782~transferase activity, transferring sulfur-containing groups,GO:0016783~sulfurtransferase activity,GO:0019843~rRNA binding,GO:0097159~organic cyclic compound binding,GO:1901363…	IPR001307:Thiosulphate sulfurtransferase, conserved site,IPR001763:Rhodanese-like domain,	mmu00270:Cysteine and methionine metabolism,mmu00920:Sulfur metabolism,mmu01100:Metabolic pathways,mmu04122:Sulfur relay system,	PF00581:Rhodanese-like domain,		Liver,Mammary gland,Whole body,	Acetylation,Complete proteome,Glycoprotein,Mitochondrion,Phosphoprotein,Reference proteome,Repeat,RNA-binding,Transferase,	active site:Cysteine persulfide intermediate,binding site:Substrate,chain:Thiosulfate sulfurtransferase,domain:Rhodanese 1,domain:Rhodanese 2,modified residue,region of interest:Hinge,			Inorganic ion transport and metabolism,		2.8.1.1,	100043456:predicted gene 10681(Gm10681),15495:hydroxy-delta-5-steroid dehydrogenase, 3 beta- and steroid delta-isomerase 4(Hsd3b4),22627:tyrosine 3-monooxygenase/tryptophan 5-monooxygenase activation protein, epsilon polypeptide(Ywhae),		NA	NA	Neuron-central	Astrocyte-central
SLC7A5	solute carrier family 7 (cationic amino acid transporter, y+ system), member 5(Slc7a5)	ENSMUSG00000040010	20539	0.798057	1.82945	0.554944	NA	NA	GO:0003333~amino acid transmembrane transport,GO:0006810~transport,GO:0006811~ion transport,GO:0006820~anion transport,GO:0006865~amino acid transport,GO:0007275~multicellular organism development,GO:0007399~nervous system development,GO:0009987~cellular process,GO:0015711~organic anion transport,GO:0015804~neutral amino acid transport,GO:0015807~L-amino acid transport,GO:0015849~organic acid tra…	GO:0005576~extracellular region,GO:0005622~intracellular,GO:0005623~cell,GO:0005737~cytoplasm,GO:0005829~cytosol,GO:0005886~plasma membrane,GO:0005887~integral component of plasma membrane,GO:0016020~membrane,GO:0016021~integral component of membrane,GO:0016324~apical plasma membrane,GO:0031224~intrinsic component of membrane,GO:0031226~intrinsic component of plasma membrane,GO:0031982~vesicle,GO…	GO:0005215~transporter activity,GO:0005342~organic acid transmembrane transporter activity,GO:0015171~amino acid transmembrane transporter activity,GO:0015175~neutral amino acid transmembrane transporter activity,GO:0015179~L-amino acid transmembrane transporter activity,GO:0015291~secondary active transmembrane transporter activity,GO:0015297~antiporter activity,GO:0022804~active transmembrane t…	IPR002293:Amino acid/polyamine transporter I,IPR004760:L-type amino acid transporter,	mmu05230:Central carbon metabolism in cancer,	PF13520:Amino acid permease,	R-MMU-210991:R-MMU-210991,R-MMU-352230:R-MMU-352230,	Heart,Mammary tumor metastatized to lung. Tumor arose spontaneously,Salivary gland,	Amino-acid transport,Cell membrane,Complete proteome,Cytoplasm,Developmental protein,Differentiation,Disulfide bond,Glycoprotein,Membrane,Neurogenesis,Phosphoprotein,Reference proteome,Transmembrane,Transmembrane helix,Transport,	chain:Large neutral amino acids transporter small subunit 1,glycosylation site:N-linked (GlcNAc...),modified residue,sequence conflict,transmembrane region,			Amino acid transport and metabolism,					NA	Astrocyte-optimal	NA	NA
NMNAT2	nicotinamide nucleotide adenylyltransferase 2(Nmnat2)	ENSMUSG00000042751	226518	NA	0.915305	1.31156	NA	-0.0177644	GO:0006082~organic acid metabolic process,GO:0006139~nucleobase-containing compound metabolic process,GO:0006520~cellular amino acid metabolic process,GO:0006531~aspartate metabolic process,GO:0006725~cellular aromatic compound metabolic process,GO:0006732~coenzyme metabolic process,GO:0006733~oxidoreduction coenzyme metabolic process,GO:0006753~nucleoside phosphate metabolic process,GO:0006793~p…	GO:0005622~intracellular,GO:0005623~cell,GO:0005737~cytoplasm,GO:0005768~endosome,GO:0005770~late endosome,GO:0005773~vacuole,GO:0005794~Golgi apparatus,GO:0005802~trans-Golgi network,GO:0012505~endomembrane system,GO:0031984~organelle subcompartment,GO:0043226~organelle,GO:0043227~membrane-bounded organelle,GO:0043229~intracellular organelle,GO:0043231~intracellular membrane-bounded organelle,GO…	GO:0000166~nucleotide binding,GO:0000309~nicotinamide-nucleotide adenylyltransferase activity,GO:0001882~nucleoside binding,GO:0001883~purine nucleoside binding,GO:0003824~catalytic activity,GO:0004515~nicotinate-nucleotide adenylyltransferase activity,GO:0005488~binding,GO:0005524~ATP binding,GO:0016740~transferase activity,GO:0016772~transferase activity, transferring phosphorus-containing grou…	IPR004821:Cytidyltransferase-like domain,IPR005248:Probable nicotinate-nucleotide adenylyltransferase,IPR014729:Rossmann-like alpha/beta/alpha sandwich fold,	mmu00760:Nicotinate and nicotinamide metabolism,mmu01100:Metabolic pathways,	PF01467:Cytidylyltransferase,	R-MMU-196807:R-MMU-196807,	Brain,	ATP-binding,Complete proteome,Cytoplasm,Golgi apparatus,NAD,Nucleotide-binding,Nucleotidyltransferase,Proteomics identification,Pyridine nucleotide biosynthesis,Reference proteome,Transferase,	binding site:Substrate,chain:Nicotinamide mononucleotide adenylyltransferase 2,nucleotide phosphate-binding region:ATP,					2.7.7.1,2.7.7.18,			NA	NA	NA	Astrocyte-central
SLC3A2	solute carrier family 3 (activators of dibasic and neutral amino acid transport), member 2(Slc3a2)	ENSMUSG00000010095	17254	0.381222	0.884949	1.03464	NA	-0.00864643	GO:0005975~carbohydrate metabolic process,GO:0006810~transport,GO:0006811~ion transport,GO:0006820~anion transport,GO:0006865~amino acid transport,GO:0007155~cell adhesion,GO:0008152~metabolic process,GO:0010033~response to organic substance,GO:0014070~response to organic cyclic compound,GO:0015711~organic anion transport,GO:0015801~aromatic amino acid transport,GO:0015803~branched-chain amino ac…	GO:0005576~extracellular region,GO:0005622~intracellular,GO:0005623~cell,GO:0005634~nucleus,GO:0005737~cytoplasm,GO:0005886~plasma membrane,GO:0005911~cell-cell junction,GO:0005912~adherens junction,GO:0005913~cell-cell adherens junction,GO:0009986~cell surface,GO:0016020~membrane,GO:0016021~integral component of membrane,GO:0016023~cytoplasmic, membrane-bounded vesicle,GO:0016324~apical plasma m…	GO:0003676~nucleic acid binding,GO:0003723~RNA binding,GO:0003725~double-stranded RNA binding,GO:0003824~catalytic activity,GO:0005215~transporter activity,GO:0005342~organic acid transmembrane transporter activity,GO:0005488~binding,GO:0005515~protein binding,GO:0015171~amino acid transmembrane transporter activity,GO:0015175~neutral amino acid transmembrane transporter activity,GO:0022857~trans…	IPR006047:Glycosyl hydrolase, family 13, catalytic domain,IPR013780:Glycosyl hydrolase, family 13, all-beta,IPR013781:Glycoside hydrolase, catalytic domain,IPR015902:Glycoside hydrolase, family 13,IPR017853:Glycoside hydrolase, superfamily,	mmu04974:Protein digestion and absorption,	PF00128:Alpha amylase, catalytic domain,	R-MMU-210991:R-MMU-210991,R-MMU-352230:R-MMU-352230,	Activated spleen,Brain,Kidney,Macrophage,Pre-B cell,Testis,	Alternative splicing,Amino-acid transport,Cell membrane,Complete proteome,Direct protein sequencing,Disulfide bond,Glycoprotein,Isopeptide bond,Membrane,Phosphoprotein,Proteomics identification,Reference proteome,Signal-anchor,Transmembrane,Transmembrane helix,Transport,Ubl conjugation,	chain:4F2 cell-surface antigen heavy chain,cross-link:Glycyl lysine isopeptide (Lys-Gly) (interchain with G-Cter in ubiquitin),disulfide bond,glycosylation site:N-linked (GlcNAc...),modified residue,mutagenesis site,topological domain:Cytoplasmic,topological domain:Extracellular,transmembrane region,						100043456:predicted gene 10681(Gm10681),15495:hydroxy-delta-5-steroid dehydrogenase, 3 beta- and steroid delta-isomerase 4(Hsd3b4),22627:tyrosine 3-monooxygenase/tryptophan 5-monooxygenase activation protein, epsilon polypeptide(Ywhae),22631:tyrosine 3-monooxygenase/tryptophan 5-monooxygenase activation protein, zeta polypeptide(Ywhaz),		NA	Astrocyte-optimal	NA	NA
gk	glycerol kinase(Gk)	ENSMUSG00000025059	14933	NA	0.666337	0.144536	NA	NA	GO:0005975~carbohydrate metabolic process,GO:0006066~alcohol metabolic process,GO:0006071~glycerol metabolic process,GO:0006072~glycerol-3-phosphate metabolic process,GO:0006629~lipid metabolic process,GO:0006638~neutral lipid metabolic process,GO:0006639~acylglycerol metabolic process,GO:0006641~triglyceride metabolic process,GO:0006793~phosphorus metabolic process,GO:0006796~phosphate-containin…	GO:0005622~intracellular,GO:0005623~cell,GO:0005634~nucleus,GO:0005737~cytoplasm,GO:0005739~mitochondrion,GO:0005740~mitochondrial envelope,GO:0005741~mitochondrial outer membrane,GO:0005829~cytosol,GO:0016020~membrane,GO:0019867~outer membrane,GO:0031090~organelle membrane,GO:0031966~mitochondrial membrane,GO:0031967~organelle envelope,GO:0031968~organelle outer membrane,GO:0031975~envelope,GO:0…	GO:0000166~nucleotide binding,GO:0001882~nucleoside binding,GO:0001883~purine nucleoside binding,GO:0003824~catalytic activity,GO:0004370~glycerol kinase activity,GO:0005488~binding,GO:0005515~protein binding,GO:0005524~ATP binding,GO:0016301~kinase activity,GO:0016740~transferase activity,GO:0016772~transferase activity, transferring phosphorus-containing groups,GO:0016773~phosphotransferase act…	IPR005999:Glycerol kinase,IPR018483:Carbohydrate kinase, FGGY, conserved site,IPR018484:Carbohydrate kinase, FGGY, N-terminal,IPR018485:Carbohydrate kinase, FGGY, C-terminal,	mmu00561:Glycerolipid metabolism,mmu01100:Metabolic pathways,mmu03320:PPAR signaling pathway,	PF00370:FGGY family of carbohydrate kinases, N-terminal domain,PF02782:FGGY family of carbohydrate kinases, C-terminal domain,	R-MMU-75109:R-MMU-75109,	Kidney,Mammary gland,Retina,Small intestine,Thymus,	Alternative splicing,ATP-binding,Complete proteome,Cytoplasm,Glycerol metabolism,Kinase,Membrane,Mitochondrion,Mitochondrion outer membrane,Nucleotide-binding,Proteomics identification,Reference proteome,Transferase,	binding site:ATP,binding site:ATP; via carbonyl oxygen,binding site:Substrate,chain:Glycerol kinase,nucleotide phosphate-binding region:ATP,sequence conflict,splice variant,		6622:Gk~glycerol kinase,			2.7.1.30,	100043456:predicted gene 10681(Gm10681),15495:hydroxy-delta-5-steroid dehydrogenase, 3 beta- and steroid delta-isomerase 4(Hsd3b4),22627:tyrosine 3-monooxygenase/tryptophan 5-monooxygenase activation protein, epsilon polypeptide(Ywhae),22631:tyrosine 3-monooxygenase/tryptophan 5-monooxygenase activation protein, zeta polypeptide(Ywhaz),		NA	NA	Neuron-central	Astrocyte-central
GYS1	glycogen synthase 1, muscle(Gys1)	ENSMUSG00000003865	14936	0.595387	0.654828	-0.296991	NA	NA	GO:0000271~polysaccharide biosynthetic process,GO:0005975~carbohydrate metabolic process,GO:0005976~polysaccharide metabolic process,GO:0005977~glycogen metabolic process,GO:0005978~glycogen biosynthetic process,GO:0006073~cellular glucan metabolic process,GO:0006091~generation of precursor metabolites and energy,GO:0006112~energy reserve metabolic process,GO:0007275~multicellular organism develo…	GO:0005622~intracellular,GO:0005623~cell,GO:0005737~cytoplasm,GO:0016020~membrane,GO:0016234~inclusion body,GO:0044424~intracellular part,GO:0044464~cell part,	GO:0003824~catalytic activity,GO:0004373~glycogen (starch) synthase activity,GO:0005488~binding,GO:0005515~protein binding,GO:0005536~glucose binding,GO:0008194~UDP-glycosyltransferase activity,GO:0016740~transferase activity,GO:0016757~transferase activity, transferring glycosyl groups,GO:0016758~transferase activity, transferring hexosyl groups,GO:0016772~transferase activity, transferring phos…	IPR008631:Glycogen synthase,	mmu00500:Starch and sucrose metabolism,mmu04151:PI3K-Akt signaling pathway,mmu04152:AMPK signaling pathway,mmu04910:Insulin signaling pathway,mmu04922:Glucagon signaling pathway,mmu04931:Insulin resistance,	PF05693:Glycogen synthase,	R-MMU-3322077:R-MMU-3322077,	Astrocyte,Dendritic cell,Embryo,Liver,Mammary tumor,	Allosteric enzyme,Complete proteome,Glycogen biosynthesis,Glycosyltransferase,Phosphoprotein,Proteomics identification,Reference proteome,Transferase,	binding site:UDP-glucose,chain:Glycogen [starch] synthase, muscle,modified residue,sequence conflict,		9619:Gys1~glycogen synthase 1, muscle,			2.4.1.11,	13853:epilepsy, progressive myoclonic epilepsy, type 2 gene alpha(Epm2a),22627:tyrosine 3-monooxygenase/tryptophan 5-monooxygenase activation protein, epsilon polypeptide(Ywhae),	13853:epilepsy, progressive myoclonic epilepsy, type 2 gene alpha(Epm2a),	NA	Astrocyte-optimal	NA	NA
SLC2A1	solute carrier family 2 (facilitated glucose transporter), member 1(Slc2a1)	ENSMUSG00000028645	20525	0.54085	0.647437	2.50299	NA	NA	GO:0006461~protein complex assembly,GO:0006810~transport,GO:0006811~ion transport,GO:0006820~anion transport,GO:0006950~response to stress,GO:0006970~response to osmotic stress,GO:0007154~cell communication,GO:0008643~carbohydrate transport,GO:0008645~hexose transport,GO:0009267~cellular response to starvation,GO:0009605~response to external stimulus,GO:0009628~response to abiotic stimulus,GO:000…	GO:0001939~female pronucleus,GO:0005576~extracellular region,GO:0005615~extracellular space,GO:0005622~intracellular,GO:0005623~cell,GO:0005634~nucleus,GO:0005737~cytoplasm,GO:0005829~cytosol,GO:0005856~cytoskeleton,GO:0005886~plasma membrane,GO:0005887~integral component of plasma membrane,GO:0005901~caveola,GO:0005911~cell-cell junction,GO:0005938~cell cortex,GO:0015629~actin cytoskeleton,GO:00…	GO:0005215~transporter activity,GO:0005355~glucose transmembrane transporter activity,GO:0005488~binding,GO:0005515~protein binding,GO:0015144~carbohydrate transmembrane transporter activity,GO:0015145~monosaccharide transmembrane transporter activity,GO:0015149~hexose transmembrane transporter activity,GO:0019899~enzyme binding,GO:0019900~kinase binding,GO:0022857~transmembrane transporter activ…	IPR002439:Glucose transporter, type 1 (GLUT1),IPR003663:Sugar/inositol transporter,IPR005828:General substrate transporter,IPR005829:Sugar transporter, conserved site,IPR020846:Major facilitator superfamily domain,	mmu04066:HIF-1 signaling pathway,mmu04911:Insulin secretion,mmu04919:Thyroid hormone signaling pathway,mmu04920:Adipocytokine signaling pathway,mmu04922:Glucagon signaling pathway,mmu04931:Insulin resistance,mmu04976:Bile secretion,mmu05166:HTLV-I infection,mmu05200:Pathways in cancer,mmu05211:Renal cell carcinoma,mmu05230:Central carbon metabolism in cancer,	PF00083:Sugar (and other) transporter,	R-MMU-196836:R-MMU-196836,R-MMU-422356:R-MMU-422356,R-MMU-428790:R-MMU-428790,R-MMU-5653890:R-MMU-5653890,R-MMU-70153:R-MMU-70153,	Brain,Embryo,Macrophage,	Acetylation,Cell membrane,Complete proteome,Glycoprotein,Membrane,Phosphoprotein,Proteomics identification,Reference proteome,Sugar transport,Transmembrane,Transmembrane helix,Transport,	chain:Solute carrier family 2, facilitated glucose transporter member 1,glycosylation site:N-linked (GlcNAc...),modified residue,region of interest:Defines substrate specificity,sequence conflict,topological domain:Cytoplasmic,topological domain:Extracellular,transmembrane region,	m_vitCBPathway:Vitamin C in the Brain,	13626:Slc2a1~solute carrier family 2 (facilitated glucose transporter), member 1,				13385:discs, large homolog 4 (Drosophila)(Dlg4),21937:tumor necrosis factor receptor superfamily, member 1a(Tnfrsf1a),		Neuron-optimal	Astrocyte-optimal	NA	NA
ALDH1B1	aldehyde dehydrogenase 1 family, member B1(Aldh1b1)	ENSMUSG00000035561	72535	NA	0.6005	-1.5706	NA	NA	GO:0006066~alcohol metabolic process,GO:0006067~ethanol metabolic process,GO:0006068~ethanol catabolic process,GO:0008152~metabolic process,GO:0009056~catabolic process,GO:0034308~primary alcohol metabolic process,GO:0034310~primary alcohol catabolic process,GO:0044281~small molecule metabolic process,GO:0044282~small molecule catabolic process,GO:0044699~single-organism process,GO:0044710~single…	GO:0005622~intracellular,GO:0005623~cell,GO:0005634~nucleus,GO:0005654~nucleoplasm,GO:0005737~cytoplasm,GO:0005739~mitochondrion,GO:0005759~mitochondrial matrix,GO:0031974~membrane-enclosed lumen,GO:0031981~nuclear lumen,GO:0043226~organelle,GO:0043227~membrane-bounded organelle,GO:0043229~intracellular organelle,GO:0043231~intracellular membrane-bounded organelle,GO:0043233~organelle lumen,GO:00…	GO:0003824~catalytic activity,GO:0004029~aldehyde dehydrogenase (NAD) activity,GO:0016491~oxidoreductase activity,GO:0016620~oxidoreductase activity, acting on the aldehyde or oxo group of donors, NAD or NADP as acceptor,GO:0016903~oxidoreductase activity, acting on the aldehyde or oxo group of donors,	IPR015590:Aldehyde dehydrogenase domain,IPR016160:Aldehyde dehydrogenase, conserved site,IPR016161:Aldehyde/histidinol dehydrogenase,IPR016162:Aldehyde dehydrogenase, N-terminal,IPR016163:Aldehyde dehydrogenase, C-terminal,	mmu00010:Glycolysis / Gluconeogenesis,mmu00053:Ascorbate and aldarate metabolism,mmu00071:Fatty acid degradation,mmu00280:Valine, leucine and isoleucine degradation,mmu00310:Lysine degradation,mmu00330:Arginine and proline metabolism,mmu00340:Histidine metabolism,mmu00380:Tryptophan metabolism,mmu00410:beta-Alanine metabolism,mmu00561:Glycerolipid metabolism,mmu00620:Pyruvate metabolism,mmu01100:…	PF00171:Aldehyde dehydrogenase family,	R-MMU-71384:R-MMU-71384,	Bone marrow,Brain,Colon,Embryo,Thymus,	Acetylation,Complete proteome,Mitochondrion,NAD,Oxidoreductase,Proteomics identification,Reference proteome,Signal,Transit peptide,	active site:Nucleophile,active site:Proton acceptor,chain:Aldehyde dehydrogenase X, mitochondrial,nucleotide phosphate-binding region:NAD,sequence conflict,site:Transition state stabilizer,transit peptide:Mitochondrion,					1.2.1.3,	22627:tyrosine 3-monooxygenase/tryptophan 5-monooxygenase activation protein, epsilon polypeptide(Ywhae),		NA	Astrocyte-optimal	Neuron-central	Astrocyte-central
LDHA	lactate dehydrogenase A(Ldha)	ENSMUSG00000063229	16828	0.699275	0.580698	0.285132	NA	-0.0388464	GO:0005975~carbohydrate metabolic process,GO:0005996~monosaccharide metabolic process,GO:0006006~glucose metabolic process,GO:0006007~glucose catabolic process,GO:0006082~organic acid metabolic process,GO:0006089~lactate metabolic process,GO:0006090~pyruvate metabolic process,GO:0006091~generation of precursor metabolites and energy,GO:0006113~fermentation,GO:0006139~nucleobase-containing compoun…	GO:0005576~extracellular region,GO:0005622~intracellular,GO:0005623~cell,GO:0005634~nucleus,GO:0005737~cytoplasm,GO:0005739~mitochondrion,GO:0005829~cytosol,GO:0005911~cell-cell junction,GO:0005912~adherens junction,GO:0005913~cell-cell adherens junction,GO:0005929~cilium,GO:0016020~membrane,GO:0016021~integral component of membrane,GO:0030054~cell junction,GO:0031224~intrinsic component of membr…	GO:0003824~catalytic activity,GO:0004457~lactate dehydrogenase activity,GO:0004459~L-lactate dehydrogenase activity,GO:0005488~binding,GO:0005515~protein binding,GO:0016491~oxidoreductase activity,GO:0016614~oxidoreductase activity, acting on CH-OH group of donors,GO:0016616~oxidoreductase activity, acting on the CH-OH group of donors, NAD or NADP as acceptor,GO:0045296~cadherin binding,GO:005083…	IPR001236:Lactate/malate dehydrogenase, N-terminal,IPR001557:L-lactate/malate dehydrogenase,IPR011304:L-lactate dehydrogenase,IPR015955:Lactate dehydrogenase/glycoside hydrolase, family 4, C-terminal,IPR016040:NAD(P)-binding domain,IPR018177:L-lactate dehydrogenase, active site,IPR022383:Lactate/malate dehydrogenase, C-terminal,	mmu00010:Glycolysis / Gluconeogenesis,mmu00270:Cysteine and methionine metabolism,mmu00620:Pyruvate metabolism,mmu00640:Propanoate metabolism,mmu01100:Metabolic pathways,mmu01130:Biosynthesis of antibiotics,mmu04922:Glucagon signaling pathway,	PF00056:lactate/malate dehydrogenase, NAD binding domain,PF02866:lactate/malate dehydrogenase, alpha/beta C-terminal domain,	R-MMU-70268:R-MMU-70268,	Bone marrow,Brain,Heart,Hippocampus,Kidney,Liver,Mammary tumor metastatized to lung. Tumor arose spontaneously,Mast cell,Stomach,Trophoblast stem cell,	Acetylation,Complete proteome,Cytoplasm,Direct protein sequencing,Membrane,NAD,Oxidoreductase,Phosphoprotein,Proteomics identification,Reference proteome,Transmembrane,Transmembrane helix,Ubl conjugation,	active site:Proton acceptor,binding site:NAD,binding site:NAD or substrate,binding site:Substrate,chain:L-lactate dehydrogenase A chain,modified residue,nucleotide phosphate-binding region:NAD,sequence conflict,		14389:Ldha~lactate dehydrogenase A,14681:Ldha~lactate dehydrogenase A,15194:Ldha~lactate dehydrogenase A,16531:Ldha~lactate dehydrogenase A,217331:Ldha~lactate dehydrogenase A,3028:Ldha~lactate dehydrogenase A,53885:Ldha~lactate dehydrogenase A,67731:Ldha~lactate dehydrogenase A,			1.1.1.27,	101502:hydroxy-delta-5-steroid dehydrogenase, 3 beta- and steroid delta-isomerase 7(Hsd3b7),104394:E2F transcription factor 4(E2f4),11991:heterogeneous nuclear ribonucleoprotein D(Hnrnpd),12617:centromere protein C1(Cenpc1),13385:discs, large homolog 4 (Drosophila)(Dlg4),14389:growth factor receptor bound protein 2-associated protein 2(Gab2),14534:K(lysine) acetyltransferase 2A(Kat2a),14812:gluta…	100040531:dynein light chain Tctex-type 1F(Dynlt1f),100040563:dynein light chain Tctex-type 1C(Dynlt1c),100310872:dynein light chain Tctex-type 1A(Dynlt1a),102414:CDC-like kinase 3(Clk3),102920:centromere protein I(Cenpi),104721:DEAD (Asp-Glu-Ala-Asp) box polypeptide 1(Ddx1),105203:family with sequence similarity 208, member B(Fam208b),106344:replication factor C (activator 1) 4(Rfc4),107932:chro…	NA	NA	Neuron-central	Astrocyte-central
GSR	glutathione reductase(Gsr)	ENSMUSG00000031584	14782	NA	0.580639	-0.16881	NA	-0.0120534	GO:0000003~reproduction,GO:0006518~peptide metabolic process,GO:0006575~cellular modified amino acid metabolic process,GO:0006749~glutathione metabolic process,GO:0006790~sulfur compound metabolic process,GO:0006807~nitrogen compound metabolic process,GO:0007276~gamete generation,GO:0007283~spermatogenesis,GO:0008152~metabolic process,GO:0009987~cellular process,GO:0019725~cellular homeostasis,GO…	GO:0005576~extracellular region,GO:0005622~intracellular,GO:0005623~cell,GO:0005737~cytoplasm,GO:0005739~mitochondrion,GO:0005829~cytosol,GO:0005886~plasma membrane,GO:0009897~external side of plasma membrane,GO:0009986~cell surface,GO:0016020~membrane,GO:0031982~vesicle,GO:0031988~membrane-bounded vesicle,GO:0043226~organelle,GO:0043227~membrane-bounded organelle,GO:0043229~intracellular organel…	GO:0000166~nucleotide binding,GO:0003824~catalytic activity,GO:0004362~glutathione-disulfide reductase activity,GO:0005488~binding,GO:0005515~protein binding,GO:0015036~disulfide oxidoreductase activity,GO:0015037~peptide disulfide oxidoreductase activity,GO:0015038~glutathione disulfide oxidoreductase activity,GO:0016209~antioxidant activity,GO:0016491~oxidoreductase activity,GO:0016651~oxidored…	IPR004099:Pyridine nucleotide-disulphide oxidoreductase, dimerisation,IPR006322:Glutathione reductase, eukaryote/bacterial,IPR012999:Pyridine nucleotide-disulphide oxidoreductase, class I, active site,IPR016156:FAD/NAD-linked reductase, dimerisation,IPR023753:Pyridine nucleotide-disulphide oxidoreductase, FAD/NAD(P)-binding domain,	mmu00480:Glutathione metabolism,mmu04918:Thyroid hormone synthesis,	PF02852:Pyridine nucleotide-disulphide oxidoreductase, dimerisation domain,PF07992:Pyridine nucleotide-disulphide oxidoreductase,	R-MMU-3299685:R-MMU-3299685,R-MMU-499943:R-MMU-499943,R-MMU-5628897:R-MMU-5628897,	Bone marrow,Brain,Eye,Mammary tumor metastatized to lung. Tumor arose spontaneously,Thymus,	Acetylation,Alternative initiation,Complete proteome,Cytoplasm,Disulfide bond,FAD,Flavoprotein,Mitochondrion,NADP,Oxidoreductase,Redox-active center,Reference proteome,Transit peptide,	active site:Proton acceptor,chain:Glutathione reductase, mitochondrial,disulfide bond,nucleotide phosphate-binding region:FAD,sequence conflict,splice variant,transit peptide:Mitochondrion,	m_freePathway:Free Radical Induced Apoptosis,				1.8.1.7,	100043456:predicted gene 10681(Gm10681),15495:hydroxy-delta-5-steroid dehydrogenase, 3 beta- and steroid delta-isomerase 4(Hsd3b4),22627:tyrosine 3-monooxygenase/tryptophan 5-monooxygenase activation protein, epsilon polypeptide(Ywhae),66171:6-phosphogluconolactonase(Pgls),		NA	NA	Neuron-central	Astrocyte-central
MTHFD1L	methylenetetrahydrofolate dehydrogenase (NADP+ dependent) 1-like(Mthfd1l)	ENSMUSG00000040675	270685	0.550958	0.547159	0.0958233	NA	NA	GO:0001501~skeletal system development,GO:0001838~embryonic epithelial tube formation,GO:0001841~neural tube formation,GO:0001843~neural tube closure,GO:0002009~morphogenesis of an epithelium,GO:0006082~organic acid metabolic process,GO:0006575~cellular modified amino acid metabolic process,GO:0006725~cellular aromatic compound metabolic process,GO:0006730~one-carbon metabolic process,GO:0006732~…	GO:0005622~intracellular,GO:0005623~cell,GO:0005737~cytoplasm,GO:0005739~mitochondrion,GO:0016020~membrane,GO:0043226~organelle,GO:0043227~membrane-bounded organelle,GO:0043229~intracellular organelle,GO:0043231~intracellular membrane-bounded organelle,GO:0044424~intracellular part,GO:0044444~cytoplasmic part,GO:0044464~cell part,	GO:0000166~nucleotide binding,GO:0001882~nucleoside binding,GO:0001883~purine nucleoside binding,GO:0003824~catalytic activity,GO:0004329~formate-tetrahydrofolate ligase activity,GO:0004488~methylenetetrahydrofolate dehydrogenase (NADP+) activity,GO:0005488~binding,GO:0005515~protein binding,GO:0005524~ATP binding,GO:0016491~oxidoreductase activity,GO:0016645~oxidoreductase activity, acting on th…	IPR000559:Formate-tetrahydrofolate ligase, FTHFS,IPR000672:Tetrahydrofolate dehydrogenase/cyclohydrolase,IPR016040:NAD(P)-binding domain,IPR020628:Formate-tetrahydrofolate ligase, FTHFS, conserved site,IPR020630:Tetrahydrofolate dehydrogenase/cyclohydrolase, catalytic domain,IPR020631:Tetrahydrofolate dehydrogenase/cyclohydrolase, NAD(P)-binding domain,IPR027417:P-loop containing nucleoside triph…	mmu00670:One carbon pool by folate,mmu01100:Metabolic pathways,	PF00763:Tetrahydrofolate dehydrogenase/cyclohydrolase, catalytic domain,PF01268:Formate--tetrahydrofolate ligase,PF02882:Tetrahydrofolate dehydrogenase/cyclohydrolase, NAD(P)-binding domain,	R-MMU-196757:R-MMU-196757,	Cerebellum,Hypothalamus,Mammary tumor,	3D-structure,Acetylation,ATP-binding,Complete proteome,Ligase,Mitochondrion,Nucleotide-binding,One-carbon metabolism,Phosphoprotein,Reference proteome,Transit peptide,	chain:Monofunctional C1-tetrahydrofolate synthase, mitochondrial,helix,modified residue,nucleotide phosphate-binding region:ATP,region of interest:Formyltetrahydrofolate synthetase,region of interest:Methylenetetrahydrofolate dehydrogenase and cyclohydrolase,sequence conflict,transit peptide:Mitochondrion,turn,		13626:Mthfd1l~methylenetetrahydrofolate dehydrogenase (NADP+ dependent) 1-like,801:Mthfd1l~methylenetetrahydrofolate dehydrogenase (NADP+ dependent) 1-like,			6.3.4.3,	100043456:predicted gene 10681(Gm10681),101502:hydroxy-delta-5-steroid dehydrogenase, 3 beta- and steroid delta-isomerase 7(Hsd3b7),15495:hydroxy-delta-5-steroid dehydrogenase, 3 beta- and steroid delta-isomerase 4(Hsd3b4),19324:RAB1A, member RAS oncogene family(Rab1a),19331:RAB19, member RAS oncogene family(Rab19),19339:RAB3A, member RAS oncogene family(Rab3a),19342:RAB4B, member RAS oncogene fa…		NA	NA	Neuron-central	Astrocyte-central
Pcx	pyruvate carboxylase(Pcx)	ENSMUSG00000024892	18563	NA	-0.538149	0.0684818	NA	NA	GO:0005975~carbohydrate metabolic process,GO:0005996~monosaccharide metabolic process,GO:0006006~glucose metabolic process,GO:0006082~organic acid metabolic process,GO:0006090~pyruvate metabolic process,GO:0006094~gluconeogenesis,GO:0006107~oxaloacetate metabolic process,GO:0006629~lipid metabolic process,GO:0006644~phospholipid metabolic process,GO:0006793~phosphorus metabolic process,GO:0006796…	GO:0005622~intracellular,GO:0005623~cell,GO:0005737~cytoplasm,GO:0005739~mitochondrion,GO:0005740~mitochondrial envelope,GO:0005743~mitochondrial inner membrane,GO:0005759~mitochondrial matrix,GO:0016020~membrane,GO:0019866~organelle inner membrane,GO:0031090~organelle membrane,GO:0031966~mitochondrial membrane,GO:0031967~organelle envelope,GO:0031974~membrane-enclosed lumen,GO:0031975~envelope,G…	GO:0000166~nucleotide binding,GO:0001882~nucleoside binding,GO:0001883~purine nucleoside binding,GO:0003676~nucleic acid binding,GO:0003677~DNA binding,GO:0003824~catalytic activity,GO:0004075~biotin carboxylase activity,GO:0004736~pyruvate carboxylase activity,GO:0005488~binding,GO:0005524~ATP binding,GO:0009374~biotin binding,GO:0016874~ligase activity,GO:0016879~ligase activity, forming carbon…	IPR000089:Biotin/lipoyl attachment,IPR000891:Pyruvate carboxyltransferase,IPR001882:Biotin-binding site,IPR003379:Carboxylase, conserved domain,IPR005479:Carbamoyl-phosphate synthetase large subunit-like, ATP-binding domain,IPR005481:Carbamoyl-phosphate synthase, large subunit, N-terminal,IPR005482:Biotin carboxylase, C-terminal,IPR005930:Pyruvate carboxylase,IPR009057:Homeodomain-like,IPR011053:…	mmu00020:Citrate cycle (TCA cycle),mmu00620:Pyruvate metabolism,mmu01100:Metabolic pathways,mmu01200:Carbon metabolism,mmu01230:Biosynthesis of amino acids,	PF00289:Carbamoyl-phosphate synthase L chain, N-terminal domain,PF00364:Biotin-requiring enzyme,PF00682:HMGL-like,PF02436:Conserved carboxylase domain,PF02785:Biotin carboxylase C-terminal domain,PF02786:Carbamoyl-phosphate synthase L chain, ATP binding domain,	R-MMU-196780:R-MMU-196780,R-MMU-70263:R-MMU-70263,	Activated spleen,Adipocyte,Liver,Whole body,	Acetylation,ATP-binding,Biotin,Complete proteome,Gluconeogenesis,Ligase,Lipid biosynthesis,Lipid metabolism,Manganese,Metal-binding,Mitochondrion,Multifunctional enzyme,Nucleotide-binding,Phosphoprotein,Proteomics identification,Pyruvate,Reference proteome,Transit peptide,	binding site:ATP,binding site:Substrate,chain:Pyruvate carboxylase, mitochondrial,domain:ATP-grasp,domain:Biotin carboxylation,domain:Biotinyl-binding,domain:Carboxyltransferase,metal ion-binding site:Manganese,metal ion-binding site:Manganese; via carbamate group,modified residue,region of interest:Substrate binding,transit peptide:Mitochondrion,	m_malatexPathway:Shuttle for transfer of acetyl groups from mitochondria to the cytosol,	20371:Pcx~pyruvate carboxylase,			6.4.1.1,	100043456:predicted gene 10681(Gm10681),101502:hydroxy-delta-5-steroid dehydrogenase, 3 beta- and steroid delta-isomerase 7(Hsd3b7),14056:enhancer of zeste 2 polycomb repressive complex 2 subunit(Ezh2),15495:hydroxy-delta-5-steroid dehydrogenase, 3 beta- and steroid delta-isomerase 4(Hsd3b4),19345:RAB5C, member RAS oncogene family(Rab5c),22627:tyrosine 3-monooxygenase/tryptophan 5-monooxygenase a…		NA	Astrocyte-optimal	NA	Astrocyte-central
PLPP3	phospholipid phosphatase 3(Plpp3)	ENSMUSG00000028517	67916	NA	-0.69785	2.5575	NA	NA	GO:0001568~blood vessel development,GO:0001667~ameboidal-type cell migration,GO:0001702~gastrulation with mouth forming second,GO:0001932~regulation of protein phosphorylation,GO:0001933~negative regulation of protein phosphorylation,GO:0001934~positive regulation of protein phosphorylation,GO:0001944~vasculature development,GO:0006139~nucleobase-containing compound metabolic process,GO:0006351~t…	GO:0005576~extracellular region,GO:0005622~intracellular,GO:0005623~cell,GO:0005737~cytoplasm,GO:0005783~endoplasmic reticulum,GO:0005789~endoplasmic reticulum membrane,GO:0005794~Golgi apparatus,GO:0005886~plasma membrane,GO:0005887~integral component of plasma membrane,GO:0012505~endomembrane system,GO:0016020~membrane,GO:0016021~integral component of membrane,GO:0031224~intrinsic component of …	GO:0003824~catalytic activity,GO:0005102~receptor binding,GO:0005178~integrin binding,GO:0005488~binding,GO:0005515~protein binding,GO:0008195~phosphatidate phosphatase activity,GO:0016787~hydrolase activity,GO:0016788~hydrolase activity, acting on ester bonds,GO:0016791~phosphatase activity,GO:0032403~protein complex binding,GO:0042392~sphingosine-1-phosphate phosphatase activity,GO:0042577~lipi…	IPR000326:Phosphatidic acid phosphatase type 2/haloperoxidase,	mmu00561:Glycerolipid metabolism,mmu00564:Glycerophospholipid metabolism,mmu00565:Ether lipid metabolism,mmu00600:Sphingolipid metabolism,mmu01100:Metabolic pathways,mmu04666:Fc gamma R-mediated phagocytosis,mmu04975:Fat digestion and absorption,mmu05231:Choline metabolism in cancer,	PF01569:PAP2 superfamily,	R-MMU-1660661:R-MMU-1660661,	Brain,Mammary gland,	Complete proteome,Developmental protein,Direct protein sequencing,Endoplasmic reticulum,Glycoprotein,Hydrolase,Membrane,Phosphoprotein,Reference proteome,Transmembrane,Transmembrane helix,	chain:Lipid phosphate phosphohydrolase 3,glycosylation site:N-linked (GlcNAc...),modified residue,sequence conflict,topological domain:Cytoplasmic,topological domain:Lumenal,transmembrane region,					3.1.3.4,	11964:ATPase, H+ transporting, lysosomal V1 subunit A(Atp6v1a),13385:discs, large homolog 4 (Drosophila)(Dlg4),54401:tyrosine 3-monooxygenase/tryptophan 5-monooxygenase activation protein, beta polypeptide(Ywhab),		NA	Astrocyte-optimal	Neuron-central	Astrocyte-central
ACSS1	acyl-CoA synthetase short-chain family member 1(Acss1)	ENSMUSG00000027452	68738	-0.381914	-0.910371	1.25014	NA	NA	GO:0006082~organic acid metabolic process,GO:0006083~acetate metabolic process,GO:0006084~acetyl-CoA metabolic process,GO:0006085~acetyl-CoA biosynthetic process,GO:0006629~lipid metabolic process,GO:0006631~fatty acid metabolic process,GO:0006633~fatty acid biosynthetic process,GO:0006637~acyl-CoA metabolic process,GO:0006732~coenzyme metabolic process,GO:0006790~sulfur compound metabolic proces…	GO:0005622~intracellular,GO:0005623~cell,GO:0005737~cytoplasm,GO:0005739~mitochondrion,GO:0005759~mitochondrial matrix,GO:0031974~membrane-enclosed lumen,GO:0043226~organelle,GO:0043227~membrane-bounded organelle,GO:0043229~intracellular organelle,GO:0043231~intracellular membrane-bounded organelle,GO:0043233~organelle lumen,GO:0044422~organelle part,GO:0044424~intracellular part,GO:0044429~mitoc…	GO:0000166~nucleotide binding,GO:0001882~nucleoside binding,GO:0001883~purine nucleoside binding,GO:0003824~catalytic activity,GO:0003987~acetate-CoA ligase activity,GO:0005488~binding,GO:0005524~ATP binding,GO:0016208~AMP binding,GO:0016405~CoA-ligase activity,GO:0016874~ligase activity,GO:0016877~ligase activity, forming carbon-sulfur bonds,GO:0016878~acid-thiol ligase activity,GO:0017076~purin…	IPR000873:AMP-dependent synthetase/ligase,IPR011904:Acetate-CoA ligase,IPR020845:AMP-binding, conserved site,IPR025110:Domain of unknown function DUF4009,	mmu00010:Glycolysis / Gluconeogenesis,mmu00620:Pyruvate metabolism,mmu00640:Propanoate metabolism,mmu01100:Metabolic pathways,mmu01130:Biosynthesis of antibiotics,mmu01200:Carbon metabolism,	PF00501:AMP-binding enzyme,PF13193:AMP-binding enzyme C-terminal domain,	R-MMU-71384:R-MMU-71384,	Activated spleen,Amnion,Fetal brain,Inner ear,Mammary tumor. C3,Mammary tumor. Metallothionien-TGF alpha model. 10 month old virgin mouse. Taken by biopsy.,Salivary gland,Thymus,	Acetylation,ATP-binding,Complete proteome,Ligase,Mitochondrion,Nucleotide-binding,Reference proteome,Transit peptide,	chain:Acetyl-coenzyme A synthetase 2-like, mitochondrial,modified residue,sequence conflict,transit peptide:Mitochondrion,		3028:Acss1~acyl-CoA synthetase short-chain family member 1,			6.2.1.1,	100043456:predicted gene 10681(Gm10681),15495:hydroxy-delta-5-steroid dehydrogenase, 3 beta- and steroid delta-isomerase 4(Hsd3b4),22627:tyrosine 3-monooxygenase/tryptophan 5-monooxygenase activation protein, epsilon polypeptide(Ywhae),		Neuron-optimal	NA	Neuron-central	Astrocyte-central

## Sheet: Neuron neurotransmission
Supplementary Table 5. Differential hub genes in the neuron during neurotransmission, including reported fold-change for both databases and cell types (Hasel et al., 2017; Tabula Muris Consortium, 2020).
Official gene symbol	Gene Name	Ensembl Gene ID	Entrez Gene ID	Astrocyte neurotransmission (log2fold-change)	Astrocyte neurotransmission TBOA (log2fold-change)	Neuron neurotransmission (log2fold-change)	Astrocyte aging (age_coefficient)	Neuron aging (age_coefficient)	GOTERM_BP_ALL	GOTERM_CC_ALL	GOTERM_MF_ALL	INTERPRO	KEGG_PATHWAY	PFAM	REACTOME_PATHWAY	UP_TISSUE	UP_KEYWORDS	UP_SEQ_FEATURE	BIOCARTA	BIOGRID_INTERACTION	COG_ONTOLOGY	DIP	EC_NUMBER	INTACT	MINT	Neuron optimal genes	Astrocyte optimal genes	Neuron central genes	Astrocyte central genes
PLPP3	phospholipid phosphatase 3(Plpp3)	ENSMUSG00000028517	67916	NA	-0.69785	2.5575	NA	NA	GO:0001568~blood vessel development,GO:0001667~ameboidal-type cell migration,GO:0001702~gastrulation with mouth forming second,GO:0001932~regulation of protein phosphorylation,GO:0001933~negative regulation of protein phosphorylation,GO:0001934~positive regulation of protein phosphorylation,GO:0001944~vasculature development,GO:0006139~nucleobase-containing compound metabolic process,GO:0006351~t…	GO:0005576~extracellular region,GO:0005622~intracellular,GO:0005623~cell,GO:0005737~cytoplasm,GO:0005783~endoplasmic reticulum,GO:0005789~endoplasmic reticulum membrane,GO:0005794~Golgi apparatus,GO:0005886~plasma membrane,GO:0005887~integral component of plasma membrane,GO:0012505~endomembrane system,GO:0016020~membrane,GO:0016021~integral component of membrane,GO:0031224~intrinsic component of …	GO:0003824~catalytic activity,GO:0005102~receptor binding,GO:0005178~integrin binding,GO:0005488~binding,GO:0005515~protein binding,GO:0008195~phosphatidate phosphatase activity,GO:0016787~hydrolase activity,GO:0016788~hydrolase activity, acting on ester bonds,GO:0016791~phosphatase activity,GO:0032403~protein complex binding,GO:0042392~sphingosine-1-phosphate phosphatase activity,GO:0042577~lipi…	IPR000326:Phosphatidic acid phosphatase type 2/haloperoxidase,	mmu00561:Glycerolipid metabolism,mmu00564:Glycerophospholipid metabolism,mmu00565:Ether lipid metabolism,mmu00600:Sphingolipid metabolism,mmu01100:Metabolic pathways,mmu04666:Fc gamma R-mediated phagocytosis,mmu04975:Fat digestion and absorption,mmu05231:Choline metabolism in cancer,	PF01569:PAP2 superfamily,	R-MMU-1660661:R-MMU-1660661,	Brain,Mammary gland,	Complete proteome,Developmental protein,Direct protein sequencing,Endoplasmic reticulum,Glycoprotein,Hydrolase,Membrane,Phosphoprotein,Reference proteome,Transmembrane,Transmembrane helix,	chain:Lipid phosphate phosphohydrolase 3,glycosylation site:N-linked (GlcNAc...),modified residue,sequence conflict,topological domain:Cytoplasmic,topological domain:Lumenal,transmembrane region,					3.1.3.4,	11964:ATPase, H+ transporting, lysosomal V1 subunit A(Atp6v1a),13385:discs, large homolog 4 (Drosophila)(Dlg4),54401:tyrosine 3-monooxygenase/tryptophan 5-monooxygenase activation protein, beta polypeptide(Ywhab),		NA	Astrocyte-optimal	Neuron-central	Astrocyte-central
SLC2A1	solute carrier family 2 (facilitated glucose transporter), member 1(Slc2a1)	ENSMUSG00000028645	20525	0.54085	0.647437	2.50299	NA	NA	GO:0006461~protein complex assembly,GO:0006810~transport,GO:0006811~ion transport,GO:0006820~anion transport,GO:0006950~response to stress,GO:0006970~response to osmotic stress,GO:0007154~cell communication,GO:0008643~carbohydrate transport,GO:0008645~hexose transport,GO:0009267~cellular response to starvation,GO:0009605~response to external stimulus,GO:0009628~response to abiotic stimulus,GO:000…	GO:0001939~female pronucleus,GO:0005576~extracellular region,GO:0005615~extracellular space,GO:0005622~intracellular,GO:0005623~cell,GO:0005634~nucleus,GO:0005737~cytoplasm,GO:0005829~cytosol,GO:0005856~cytoskeleton,GO:0005886~plasma membrane,GO:0005887~integral component of plasma membrane,GO:0005901~caveola,GO:0005911~cell-cell junction,GO:0005938~cell cortex,GO:0015629~actin cytoskeleton,GO:00…	GO:0005215~transporter activity,GO:0005355~glucose transmembrane transporter activity,GO:0005488~binding,GO:0005515~protein binding,GO:0015144~carbohydrate transmembrane transporter activity,GO:0015145~monosaccharide transmembrane transporter activity,GO:0015149~hexose transmembrane transporter activity,GO:0019899~enzyme binding,GO:0019900~kinase binding,GO:0022857~transmembrane transporter activ…	IPR002439:Glucose transporter, type 1 (GLUT1),IPR003663:Sugar/inositol transporter,IPR005828:General substrate transporter,IPR005829:Sugar transporter, conserved site,IPR020846:Major facilitator superfamily domain,	mmu04066:HIF-1 signaling pathway,mmu04911:Insulin secretion,mmu04919:Thyroid hormone signaling pathway,mmu04920:Adipocytokine signaling pathway,mmu04922:Glucagon signaling pathway,mmu04931:Insulin resistance,mmu04976:Bile secretion,mmu05166:HTLV-I infection,mmu05200:Pathways in cancer,mmu05211:Renal cell carcinoma,mmu05230:Central carbon metabolism in cancer,	PF00083:Sugar (and other) transporter,	R-MMU-196836:R-MMU-196836,R-MMU-422356:R-MMU-422356,R-MMU-428790:R-MMU-428790,R-MMU-5653890:R-MMU-5653890,R-MMU-70153:R-MMU-70153,	Brain,Embryo,Macrophage,	Acetylation,Cell membrane,Complete proteome,Glycoprotein,Membrane,Phosphoprotein,Proteomics identification,Reference proteome,Sugar transport,Transmembrane,Transmembrane helix,Transport,	chain:Solute carrier family 2, facilitated glucose transporter member 1,glycosylation site:N-linked (GlcNAc...),modified residue,region of interest:Defines substrate specificity,sequence conflict,topological domain:Cytoplasmic,topological domain:Extracellular,transmembrane region,	m_vitCBPathway:Vitamin C in the Brain,	13626:Slc2a1~solute carrier family 2 (facilitated glucose transporter), member 1,				13385:discs, large homolog 4 (Drosophila)(Dlg4),21937:tumor necrosis factor receptor superfamily, member 1a(Tnfrsf1a),		Neuron-optimal	Astrocyte-optimal	NA	NA
ATP1A1	ATPase, Na+/K+ transporting, alpha 1 polypeptide(Atp1a1)	ENSMUSG00000033161	11928	NA	NA	1.31408	NA	NA	GO:0002026~regulation of the force of heart contraction,GO:0002028~regulation of sodium ion transport,GO:0003008~system process,GO:0003012~muscle system process,GO:0003013~circulatory system process,GO:0003015~heart process,GO:0006629~lipid metabolic process,GO:0006694~steroid biosynthetic process,GO:0006704~glucocorticoid biosynthetic process,GO:0006810~transport,GO:0006811~ion transport,GO:0006…	GO:0005576~extracellular region,GO:0005622~intracellular,GO:0005623~cell,GO:0005737~cytoplasm,GO:0005768~endosome,GO:0005773~vacuole,GO:0005783~endoplasmic reticulum,GO:0005794~Golgi apparatus,GO:0005886~plasma membrane,GO:0005887~integral component of plasma membrane,GO:0005890~sodium:potassium-exchanging ATPase complex,GO:0005901~caveola,GO:0005911~cell-cell junction,GO:0012505~endomembrane sys…	GO:0000166~nucleotide binding,GO:0001882~nucleoside binding,GO:0001883~purine nucleoside binding,GO:0003824~catalytic activity,GO:0005215~transporter activity,GO:0005391~sodium:potassium-exchanging ATPase activity,GO:0005488~binding,GO:0005496~steroid binding,GO:0005515~protein binding,GO:0005524~ATP binding,GO:0008092~cytoskeletal protein binding,GO:0008289~lipid binding,GO:0008324~cation transm…	IPR001757:Cation-transporting P-type ATPase,IPR004014:Cation-transporting P-type ATPase, N-terminal,IPR005775:Sodium/potassium-transporting P-type ATPase, subfamily IIC,IPR006068:Cation-transporting P-type ATPase, C-terminal,IPR008250:P-type ATPase, A domain,IPR018303:P-type ATPase, phosphorylation site,IPR023214:HAD-like domain,IPR023298:P-type ATPase, transmembrane domain,IPR023299:P-type ATPas…	mmu04022:cGMP-PKG signaling pathway,mmu04024:cAMP signaling pathway,mmu04260:Cardiac muscle contraction,mmu04261:Adrenergic signaling in cardiomyocytes,mmu04911:Insulin secretion,mmu04918:Thyroid hormone synthesis,mmu04919:Thyroid hormone signaling pathway,mmu04960:Aldosterone-regulated sodium reabsorption,mmu04961:Endocrine and other factor-regulated calcium reabsorption,mmu04964:Proximal tubule…	PF00122:E1-E2 ATPase,PF00689:Cation transporting ATPase, C-terminus,PF00690:Cation transporter/ATPase, N-terminus,	R-MMU-5578775:R-MMU-5578775,R-MMU-936837:R-MMU-936837,	Bone marrow,Brain,Brain cortex,Hippocampus,Liver,Mammary gland,Mammary tumor. C3,Mammary tumor. MMTV-LTR/INT3 model. 5 month old mouse. Taken by biopsy.,Sympathetic ganglion,	Acetylation,ATP-binding,Cell membrane,Complete proteome,Direct protein sequencing,Hydrolase,Ion transport,Magnesium,Membrane,Metal-binding,Nucleotide-binding,Phosphoprotein,Potassium,Potassium transport,Reference proteome,Sodium,Sodium transport,Sodium/potassium transport,Transmembrane,Transmembrane helix,Transport,	active site:4-aspartylphosphate intermediate,chain:Sodium/potassium-transporting ATPase subunit alpha-1,metal ion-binding site:Magnesium,modified residue,region of interest:Phosphoinositide-3 kinase binding,topological domain:Cytoplasmic,topological domain:Lumenal,transmembrane region,		12289:Atp1a1~ATPase, Na+/K+ transporting, alpha 1 polypeptide,13385:Atp1a1~ATPase, Na+/K+ transporting, alpha 1 polypeptide,13626:Atp1a1~ATPase, Na+/K+ transporting, alpha 1 polypeptide,16531:Atp1a1~ATPase, Na+/K+ transporting, alpha 1 polypeptide,18999:Atp1a1~ATPase, Na+/K+ transporting, alpha 1 polypeptide,19122:Atp1a1~ATPase, Na+/K+ transporting, alpha 1 polypeptide,20541:Atp1a1~ATPase, Na+/K+…		16438:inositol 1,4,5-trisphosphate receptor 1(Itpr1),20541:solute carrier family 8 (sodium/calcium exchanger), member 1(Slc8a1),	3.6.3.-,3.6.3.9,	100043456:predicted gene 10681(Gm10681),11459:actin, alpha 1, skeletal muscle(Acta1),11931:ATPase, Na+/K+ transporting, beta 1 polypeptide(Atp1b1),14056:enhancer of zeste 2 polycomb repressive complex 2 subunit(Ezh2),14800:glutamate receptor, ionotropic, AMPA2 (alpha 2)(Gria2),14810:glutamate receptor, ionotropic, NMDA1 (zeta 1)(Grin1),14812:glutamate receptor, ionotropic, NMDA2B (epsilon 2)(Grin…	100042025:glyceraldehyde-3-phosphate dehydrogenase, pseudogene 15(Gapdh-ps15),103733:tubulin, gamma 1(Tubg1),107975:phosphofurin acidic cluster sorting protein 1(Pacs1),109674:adenosine monophosphate deaminase 2(Ampd2),11771:adaptor-related protein complex 2, alpha 1 subunit(Ap2a1),11906:zinc finger homeobox 3(Zfhx3),11944:ATPase, H+/K+ exchanging, gastric, alpha polypeptide(Atp4a),11972:ATPase, …	Neuron-optimal	NA	NA	NA
[truncated: 50 more rows]

## Sheet: Astrocyte aging
Supplementary Table 6. Differential hub genes in the astrocyte during aging, including reported fold-change for both databases and cell types (Hasel et al., 2017; Tabula Muris Consortium, 2020).
[truncated: 27 more rows]

## Sheet: Neuron aging
Supplementary Table 7. Differential hub genes in the neuron during aging, including reported fold-change for both databases and cell types (Hasel et al., 2017; Tabula Muris Consortium, 2020).
[truncated: 74 more rows]
